# Supplementary material for: Genetic Architecture and Genomic Prediction of Cooking Time in Common Bean (Phaseolus vulgaris L.)
Source: Front Plant Sci. 2021 Feb 11;11:622213. doi: 10.3389/fpls.2020.622213 (PMC7905357; doi:10.3389/fpls.2020.622213)
Supplement: Supplementary Table 5 — Complete GWAS results for all markers used in association analyses for cooking time, evaluating the MAGIC population, VEF panel and MIP panel. [file Table_5.XLSX]

## Sheet: MAGIC
Marker	Chromosome	Position	Marker ID	Reference allele	Alternative allele	p value	MAF	n	R2	FDR Adjusted p values	Effect
Pv2.1_03_983982	Pv03	983982	Pv2.1_03_983982_T/C	T	C	1.38611e-06	0.381773	203	0.343988	0.00968622	-1.98355
Pv2.1_03_984162	Pv03	984162	Pv2.1_03_984162_G/A	G	A	1.92439e-06	0.369458	203	0.341279	0.00968622	-2.01052
Pv2.1_03_983994	Pv03	983994	Pv2.1_03_983994_G/A	G	A	2.19468e-06	0.389163	203	0.340197	0.00968622	-1.94085
Pv2.1_03_984018	Pv03	984018	Pv2.1_03_984018_C/A	C	A	2.19468e-06	0.389163	203	0.340197	0.00968622	-1.94085
Pv2.1_03_1022574	Pv03	1022574	Pv2.1_03_1022574_T/C	T	C	6.04688e-06	0.369458	203	0.331914	0.016346	-1.89911
Pv2.1_03_983900	Pv03	983900	Pv2.1_03_983900_C/T	C	T	6.95359e-06	0.3867	203	0.330781	0.016346	-1.83891
Pv2.1_03_984231	Pv03	984231	Pv2.1_03_984231_A/G	A	G	7.40729e-06	0.374384	203	0.330269	0.016346	-1.87928
Pv2.1_03_984236	Pv03	984236	Pv2.1_03_984236_C/T	C	T	7.40729e-06	0.374384	203	0.330269	0.016346	-1.87928
Pv2.1_03_757795	Pv03	757795	Pv2.1_03_757795_G/A	G	A	1.15559e-05	0.243842	203	0.32668	0.0198692	-2.32359
Pv2.1_03_990270	Pv03	990270	Pv2.1_03_990270_A/T	A	T	1.19296e-05	0.369458	203	0.326424	0.0198692	-1.83608
Pv2.1_03_757735	Pv03	757735	Pv2.1_03_757735_C/A	C	A	1.23803e-05	0.241379	203	0.326126	0.0198692	-2.31811
Pv2.1_03_37139	Pv03	37139	Pv2.1_03_37139_T/C	T	C	1.4752e-05	0.238916	203	0.324719	0.0217026	-2.36984
Pv2.1_03_766014	Pv03	766014	Pv2.1_03_766014_C/T	C	T	1.96828e-05	0.246305	203	0.322412	0.0267292	-2.31185
Pv2.1_03_1033591	Pv03	1033591	Pv2.1_03_1033591_T/C	T	C	3.99664e-05	0.480296	203	0.316785	0.0490616	1.89105
Pv2.1_03_45906	Pv03	45906	Pv2.1_03_45906_C/T	C	T	4.16859e-05	0.238916	203	0.316452	0.0490616	-2.22163
Pv2.1_03_1118917	Pv03	1118917	Pv2.1_03_1118917_G/A	G	A	4.85398e-05	0.475369	203	0.315251	0.0507165	1.92192
Pv2.1_03_1069395	Pv03	1069395	Pv2.1_03_1069395_C/T	C	T	4.88377e-05	0.480296	203	0.315203	0.0507165	1.93457
Pv2.1_03_755530	Pv03	755530	Pv2.1_03_755530_G/C	G	C	5.25969e-05	0.359606	203	0.314619	0.0515859	2.15395
Pv2.1_03_1152908	Pv03	1152908	Pv2.1_03_1152908_T/G	T	G	8.40653e-05	0.46798	203	0.310942	0.0705822	1.82487
Pv2.1_03_1080561	Pv03	1080561	Pv2.1_03_1080561_T/C	T	C	8.84435e-05	0.472906	203	0.310545	0.0705822	1.78233
Pv2.1_03_1109453	Pv03	1109453	Pv2.1_03_1109453_T/C	T	C	9.01504e-05	0.472906	203	0.310396	0.0705822	-1.81464
Pv2.1_03_1109443	Pv03	1109443	Pv2.1_03_1109443_A/G	A	G	9.01504e-05	0.472906	203	0.310396	0.0705822	1.81464
Pv2.1_03_1214564	Pv03	1214564	Pv2.1_03_1214564_T/A	T	A	9.83453e-05	0.485222	203	0.309718	0.0705822	1.83241
Pv2.1_03_1278277	Pv03	1278277	Pv2.1_03_1278277_G/A	G	A	9.99522e-05	0.231527	203	0.309591	0.0705822	-2.06504
Pv2.1_03_1277962	Pv03	1277962	Pv2.1_03_1277962_C/T	C	T	9.99522e-05	0.231527	203	0.309591	0.0705822	2.06504
Pv2.1_03_789508	Pv03	789508	Pv2.1_03_789508_C/T	C	T	0.000108676	0.337438	203	0.30894	0.0737908	-2.09413
Pv2.1_03_949932	Pv03	949932	Pv2.1_03_949932_T/C	T	C	0.000141266	0.5	203	0.306903	0.0834244	-1.76019
Pv2.1_03_1245068	Pv03	1245068	Pv2.1_03_1245068_G/A	G	A	0.000141766	0.472906	203	0.306876	0.0834244	1.75995
Pv2.1_03_1245079	Pv03	1245079	Pv2.1_03_1245079_T/G	T	G	0.000141766	0.472906	203	0.306876	0.0834244	1.75995
Pv2.1_03_1245138	Pv03	1245138	Pv2.1_03_1245138_A/C	A	C	0.000141766	0.472906	203	0.306876	0.0834244	1.75995
Pv2.1_03_983901	Pv03	983901	Pv2.1_03_983901_T/C	T	C	0.000150831	0.480296	203	0.306396	0.08495	1.72034
Pv2.1_03_922089	Pv03	922089	Pv2.1_03_922089_T/C	T	C	0.000157928	0.347291	203	0.30604	0.08495	-1.88701
Pv2.1_03_1279707	Pv03	1279707	Pv2.1_03_1279707_A/T	A	T	0.000158794	0.238916	203	0.305998	0.08495	-2.03534
Pv2.1_03_1004172	Pv03	1004172	Pv2.1_03_1004172_T/A	T	A	0.000193265	0.5	203	0.304481	0.10035	-1.76916
Pv2.1_03_774784	Pv03	774784	Pv2.1_03_774784_A/C	A	C	0.000221214	0.344828	203	0.303442	0.11158	-2.06955
Pv2.1_03_1244847	Pv03	1244847	Pv2.1_03_1244847_C/T	C	T	0.000306023	0.477833	203	0.300953	0.15007	1.61925
Pv2.1_03_549370	Pv03	549370	Pv2.1_03_549370_T/C	T	C	0.000414722	0.339901	203	0.298636	0.194221	-1.97036
Pv2.1_03_968588	Pv03	968588	Pv2.1_03_968588_T/C	T	C	0.000418058	0.492611	203	0.298575	0.194221	-1.60879
Pv2.1_03_430945	Pv03	430945	Pv2.1_03_430945_T/C	T	C	0.000448277	0.32266	203	0.298044	0.201407	-1.92956
Pv2.1_03_1245220	Pv03	1245220	Pv2.1_03_1245220_A/T	A	T	0.000457082	0.487685	203	0.297897	0.201407	-1.59017
Pv2.1_03_1245221	Pv03	1245221	Pv2.1_03_1245221_A/T	A	T	0.000467751	0.492611	203	0.297722	0.201407	-1.6013
Pv2.1_03_547672	Pv03	547672	Pv2.1_03_547672_C/G	C	G	0.000495577	0.327586	203	0.297283	0.208308	-1.95136
Pv2.1_03_51082	Pv03	51082	Pv2.1_03_51082_A/C	A	C	0.000546762	0.349754	203	0.296539	0.224477	-1.96661
Pv2.1_03_812391	Pv03	812391	Pv2.1_03_812391_T/G	T	G	0.000583845	0.366995	203	0.296043	0.232368	-1.92363
Pv2.1_03_812336	Pv03	812336	Pv2.1_03_812336_A/G	A	G	0.000592306	0.362069	203	0.295934	0.232368	-1.94268
Pv2.1_03_555076	Pv03	555076	Pv2.1_03_555076_C/T	C	T	0.000631587	0.332512	203	0.29545	0.239046	-1.82556
Pv2.1_03_1166216	Pv03	1166216	Pv2.1_03_1166216_A/G	A	G	0.00063641	0.497537	203	0.295392	0.239046	-1.57809
Pv2.1_01_42449486	Pv01	42449486	Pv2.1_01_42449486_C/A	C	A	0.000681145	0.0714286	203	0.29488	0.245778	2.25258
Pv2.1_03_883197	Pv03	883197	Pv2.1_03_883197_G/C	G	C	0.000707002	0.349754	203	0.2946	0.245778	-1.84331
Pv2.1_03_883191	Pv03	883191	Pv2.1_03_883191_C/T	C	T	0.000707002	0.349754	203	0.2946	0.245778	1.84331
Pv2.1_03_37169	Pv03	37169	Pv2.1_03_37169_T/A	T	A	0.000739468	0.357143	203	0.294262	0.245778	-1.92028
Pv2.1_03_883215	Pv03	883215	Pv2.1_03_883215_A/T	A	T	0.000745293	0.352217	203	0.294203	0.245778	-1.85126
Pv2.1_03_549414	Pv03	549414	Pv2.1_03_549414_A/G	A	G	0.000749602	0.339901	203	0.29416	0.245778	-1.87468
Pv2.1_03_883507	Pv03	883507	Pv2.1_03_883507_C/T	C	T	0.000751786	0.35468	203	0.294138	0.245778	-1.80082
Pv2.1_03_526313	Pv03	526313	Pv2.1_03_526313_T/C	T	C	0.000777476	0.35468	203	0.293885	0.249556	-1.79819
Pv2.1_03_1166130	Pv03	1166130	Pv2.1_03_1166130_A/G	A	G	0.00081419	0.5	203	0.293539	0.25637	-1.5778
Pv2.1_03_398184	Pv03	398184	Pv2.1_03_398184_G/A	G	A	0.000827751	0.342365	203	0.293415	0.25637	-1.8197
Pv2.1_03_526330	Pv03	526330	Pv2.1_03_526330_T/C	T	C	0.000876879	0.352217	203	0.292982	0.266904	-1.76582
Pv2.1_03_526287	Pv03	526287	Pv2.1_03_526287_A/C	A	C	0.000914707	0.352217	203	0.292666	0.269137	-1.77947
Pv2.1_03_526288	Pv03	526288	Pv2.1_03_526288_G/T	G	T	0.000914707	0.352217	203	0.292666	0.269137	-1.77947
Pv2.1_03_812357	Pv03	812357	Pv2.1_03_812357_A/G	A	G	0.000987883	0.362069	203	0.29209	0.285903	-1.8422
Pv2.1_03_526317	Pv03	526317	Pv2.1_03_526317_T/C	T	C	0.0010845	0.349754	203	0.291393	0.308803	-1.76607
Pv2.1_03_79548	Pv03	79548	Pv2.1_03_79548_T/A	T	A	0.0011175	0.359606	203	0.29117	0.313147	-1.8276
Pv2.1_03_79532	Pv03	79532	Pv2.1_03_79532_T/A	T	A	0.00116069	0.339901	203	0.290887	0.318417	-1.72749
Pv2.1_03_19501	Pv03	19501	Pv2.1_03_19501_T/A	T	A	0.00124145	0.359606	203	0.290386	0.318417	-1.83113
Pv2.1_03_51015	Pv03	51015	Pv2.1_03_51015_A/G	A	G	0.00133182	0.362069	203	0.289864	0.318417	-1.8114
Pv2.1_07_30324340	Pv07	30324340	Pv2.1_07_30324340_T/C	T	C	0.00138965	0.458128	203	0.289548	0.318417	-1.54795
Pv2.1_03_789481	Pv03	789481	Pv2.1_03_789481_A/C	A	C	0.00140635	0.344828	203	0.289459	0.318417	-1.74829
Pv2.1_07_30324335	Pv07	30324335	Pv2.1_07_30324335_C/T	C	T	0.00143803	0.455665	203	0.289294	0.318417	-1.54773
Pv2.1_07_30324336	Pv07	30324336	Pv2.1_07_30324336_A/T	A	T	0.00143803	0.455665	203	0.289294	0.318417	-1.54773
Pv2.1_07_30324339	Pv07	30324339	Pv2.1_07_30324339_C/G	C	G	0.00143803	0.455665	203	0.289294	0.318417	-1.54773
Pv2.1_07_30324342	Pv07	30324342	Pv2.1_07_30324342_A/C	A	C	0.00143803	0.455665	203	0.289294	0.318417	-1.54773
Pv2.1_03_816132	Pv03	816132	Pv2.1_03_816132_C/T	C	T	0.00144532	0.349754	203	0.289257	0.318417	-1.74631
Pv2.1_03_816149	Pv03	816149	Pv2.1_03_816149_C/T	C	T	0.00144532	0.349754	203	0.289257	0.318417	-1.74631
Pv2.1_03_816150	Pv03	816150	Pv2.1_03_816150_G/A	G	A	0.00144532	0.349754	203	0.289257	0.318417	-1.74631
Pv2.1_03_789805	Pv03	789805	Pv2.1_03_789805_C/T	C	T	0.00144532	0.349754	203	0.289257	0.318417	1.74631
Pv2.1_03_789820	Pv03	789820	Pv2.1_03_789820_G/T	G	T	0.00144532	0.349754	203	0.289257	0.318417	1.74631
Pv2.1_03_276768	Pv03	276768	Pv2.1_03_276768_A/G	A	G	0.00146096	0.35468	203	0.289177	0.318417	-1.68412
Pv2.1_03_276795	Pv03	276795	Pv2.1_03_276795_G/C	G	C	0.00146096	0.35468	203	0.289177	0.318417	-1.68412
Pv2.1_03_276758	Pv03	276758	Pv2.1_03_276758_A/T	A	T	0.00146096	0.35468	203	0.289177	0.318417	1.68412
Pv2.1_03_276796	Pv03	276796	Pv2.1_03_276796_C/T	C	T	0.00146096	0.35468	203	0.289177	0.318417	1.68412
Pv2.1_03_424827	Pv03	424827	Pv2.1_03_424827_C/T	C	T	0.00153583	0.349754	203	0.288806	0.32712	-1.66205
Pv2.1_03_881258	Pv03	881258	Pv2.1_03_881258_T/C	T	C	0.00155228	0.357143	203	0.288728	0.32712	-1.74066
Pv2.1_03_112102	Pv03	112102	Pv2.1_03_112102_T/G	T	G	0.00157346	0.35468	203	0.288627	0.32712	-1.79137
Pv2.1_03_283344	Pv03	283344	Pv2.1_03_283344_A/G	A	G	0.00157501	0.352217	203	0.28862	0.32712	-1.6898
Pv2.1_03_115331	Pv03	115331	Pv2.1_03_115331_A/G	A	G	0.00160946	0.352217	203	0.28846	0.330389	-1.74842
Pv2.1_03_883035	Pv03	883035	Pv2.1_03_883035_G/T	G	T	0.00165151	0.362069	203	0.288269	0.335123	-1.77594
Pv2.1_07_30346959	Pv07	30346959	Pv2.1_07_30346959_G/A	G	A	0.00171959	0.453202	203	0.287971	0.340009	-1.50674
Pv2.1_07_30324313	Pv07	30324313	Pv2.1_07_30324313_A/T	A	T	0.00174265	0.453202	203	0.287872	0.340009	-1.51944
Pv2.1_03_424944	Pv03	424944	Pv2.1_03_424944_C/T	C	T	0.00175351	0.339901	203	0.287826	0.340009	1.65485
Pv2.1_03_79531	Pv03	79531	Pv2.1_03_79531_A/C	A	C	0.00177188	0.334975	203	0.287749	0.340009	1.64343
Pv2.1_03_79533	Pv03	79533	Pv2.1_03_79533_A/T	A	T	0.00177188	0.334975	203	0.287749	0.340009	1.64343
Pv2.1_08_60892537	Pv08	60892537	Pv2.1_08_60892537_T/G	T	G	0.00183741	0.261084	203	0.287481	0.343011	-1.62359
Pv2.1_03_549568	Pv03	549568	Pv2.1_03_549568_A/G	A	G	0.00184634	0.339901	203	0.287446	0.343011	-1.68121
Pv2.1_03_812217	Pv03	812217	Pv2.1_03_812217_T/C	T	C	0.00188516	0.35468	203	0.287292	0.343011	-1.75644
Pv2.1_08_62807463	Pv08	62807463	Pv2.1_08_62807463_A/T	A	T	0.0019092	0.472906	203	0.287199	0.343011	-1.42049
Pv2.1_03_867145	Pv03	867145	Pv2.1_03_867145_T/C	T	C	0.00192146	0.357143	203	0.287152	0.343011	-1.74892
Pv2.1_03_836874	Pv03	836874	Pv2.1_03_836874_T/C	T	C	0.00192719	0.349754	203	0.28713	0.343011	-1.70896
Pv2.1_03_882926	Pv03	882926	Pv2.1_03_882926_T/A	T	A	0.00194296	0.35468	203	0.28707	0.343011	-1.69792
Pv2.1_03_882920	Pv03	882920	Pv2.1_03_882920_C/T	C	T	0.00194296	0.35468	203	0.28707	0.343011	1.69792
Pv2.1_03_590574	Pv03	590574	Pv2.1_03_590574_A/C	A	C	0.00201975	0.332512	203	0.286784	0.353036	-1.67557
Pv2.1_03_1519585	Pv03	1519585	Pv2.1_03_1519585_A/G	A	G	0.00220637	0.317734	203	0.286134	0.381875	-1.44336
Pv2.1_03_2068160	Pv03	2068160	Pv2.1_03_2068160_G/C	G	C	0.00226154	0.221675	203	0.285953	0.382517	1.52089
Pv2.1_03_430573	Pv03	430573	Pv2.1_03_430573_G/A	G	A	0.00227508	0.305419	203	0.285909	0.382517	-1.62735
Pv2.1_03_430574	Pv03	430574	Pv2.1_03_430574_T/C	T	C	0.00227508	0.305419	203	0.285909	0.382517	-1.62735
Pv2.1_03_544088	Pv03	544088	Pv2.1_03_544088_C/T	C	T	0.00230858	0.349754	203	0.285802	0.384488	-1.63523
Pv2.1_03_263048	Pv03	263048	Pv2.1_03_263048_T/A	T	A	0.00237982	0.347291	203	0.285579	0.389717	-1.69162
Pv2.1_08_45858256	Pv08	45858256	Pv2.1_08_45858256_T/G	T	G	0.00238413	0.224138	203	0.285566	0.389717	-1.55448
Pv2.1_03_883107	Pv03	883107	Pv2.1_03_883107_A/G	A	G	0.00250986	0.339901	203	0.285189	0.399541	-1.6351
Pv2.1_01_42971854	Pv01	42971854	Pv2.1_01_42971854_C/A	C	A	0.00251379	0.0862069	203	0.285178	0.399541	1.88342
Pv2.1_08_60889492	Pv08	60889492	Pv2.1_08_60889492_A/G	A	G	0.00253476	0.263547	203	0.285117	0.399541	-1.51809
Pv2.1_08_60889526	Pv08	60889526	Pv2.1_08_60889526_C/T	C	T	0.00253476	0.263547	203	0.285117	0.399541	-1.51809
Pv2.1_03_115333	Pv03	115333	Pv2.1_03_115333_A/T	A	T	0.00256647	0.347291	203	0.285026	0.399613	-1.67504
Pv2.1_03_186235	Pv03	186235	Pv2.1_03_186235_A/T	A	T	0.00258049	0.352217	203	0.284986	0.399613	-1.68413
Pv2.1_03_1519557	Pv03	1519557	Pv2.1_03_1519557_C/T	C	T	0.00277103	0.317734	203	0.284465	0.425389	-1.41902
Pv2.1_03_430695	Pv03	430695	Pv2.1_03_430695_T/A	T	A	0.00291031	0.347291	203	0.284107	0.434695	-1.61147
Pv2.1_03_430706	Pv03	430706	Pv2.1_03_430706_T/C	T	C	0.00291031	0.347291	203	0.284107	0.434695	-1.61147
Pv2.1_03_1471129	Pv03	1471129	Pv2.1_03_1471129_A/G	A	G	0.00295476	0.320197	203	0.283997	0.434695	-1.41804
Pv2.1_03_1471139	Pv03	1471139	Pv2.1_03_1471139_A/G	A	G	0.00295476	0.320197	203	0.283997	0.434695	-1.41804
Pv2.1_03_1471140	Pv03	1471140	Pv2.1_03_1471140_C/T	C	T	0.00295476	0.320197	203	0.283997	0.434695	-1.41804
Pv2.1_03_103669	Pv03	103669	Pv2.1_03_103669_C/A	C	A	0.00304685	0.352217	203	0.283773	0.444538	-1.61979
Pv2.1_08_60899180	Pv08	60899180	Pv2.1_08_60899180_G/A	G	A	0.00318355	0.26601	203	0.283453	0.451441	-1.47631
Pv2.1_08_62731512	Pv08	62731512	Pv2.1_08_62731512_G/A	G	A	0.00324164	0.137931	203	0.283322	0.451441	-1.78389
Pv2.1_08_62731540	Pv08	62731540	Pv2.1_08_62731540_G/A	G	A	0.00324164	0.137931	203	0.283322	0.451441	-1.78389
Pv2.1_03_77635	Pv03	77635	Pv2.1_03_77635_G/C	G	C	0.00324232	0.352217	203	0.28332	0.451441	-1.65136
Pv2.1_03_107304	Pv03	107304	Pv2.1_03_107304_T/C	T	C	0.00324759	0.357143	203	0.283309	0.451441	-1.65739
Pv2.1_03_117709	Pv03	117709	Pv2.1_03_117709_C/A	C	A	0.00324759	0.357143	203	0.283309	0.451441	-1.65739
Pv2.1_08_60895387	Pv08	60895387	Pv2.1_08_60895387_T/A	T	A	0.00332336	0.26601	203	0.283141	0.452903	-1.49642
Pv2.1_03_1333734	Pv03	1333734	Pv2.1_03_1333734_C/T	C	T	0.00336073	0.349754	203	0.28306	0.452903	-1.46929
Pv2.1_03_1334000	Pv03	1334000	Pv2.1_03_1334000_T/C	T	C	0.00336073	0.349754	203	0.28306	0.452903	-1.46929
Pv2.1_03_1336986	Pv03	1336986	Pv2.1_03_1336986_A/G	A	G	0.00336073	0.349754	203	0.28306	0.452903	1.46929
Pv2.1_03_77712	Pv03	77712	Pv2.1_03_77712_T/A	T	A	0.00338896	0.364532	203	0.282999	0.453248	-1.62656
Pv2.1_03_77577	Pv03	77577	Pv2.1_03_77577_A/G	A	G	0.00349612	0.35468	203	0.282773	0.464064	-1.65036
Pv2.1_03_1302821	Pv03	1302821	Pv2.1_03_1302821_C/A	C	A	0.00369183	0.352217	203	0.282377	0.48471	-1.47743
Pv2.1_03_592743	Pv03	592743	Pv2.1_03_592743_G/A	G	A	0.00370657	0.342365	203	0.282348	0.48471	-1.5351
Pv2.1_03_261699	Pv03	261699	Pv2.1_03_261699_A/G	A	G	0.00394617	0.35468	203	0.281895	0.508985	-1.54472
Pv2.1_03_119489	Pv03	119489	Pv2.1_03_119489_T/C	T	C	0.00396697	0.349754	203	0.281857	0.508985	-1.57787
Pv2.1_03_77672	Pv03	77672	Pv2.1_03_77672_A/T	A	T	0.00398168	0.362069	203	0.28183	0.508985	-1.60543
Pv2.1_03_1302845	Pv03	1302845	Pv2.1_03_1302845_C/A	C	A	0.00407183	0.349754	203	0.281668	0.508985	-1.45517
Pv2.1_03_1302852	Pv03	1302852	Pv2.1_03_1302852_G/A	G	A	0.00407183	0.349754	203	0.281668	0.508985	-1.45517
Pv2.1_03_1302878	Pv03	1302878	Pv2.1_03_1302878_C/T	C	T	0.00407183	0.349754	203	0.281668	0.508985	-1.45517
Pv2.1_03_592656	Pv03	592656	Pv2.1_03_592656_G/A	G	A	0.00409402	0.332512	203	0.281629	0.508985	-1.52747
Pv2.1_08_62807624	Pv08	62807624	Pv2.1_08_62807624_C/T	C	T	0.00427718	0.438424	203	0.281312	0.528038	-1.19636
Pv2.1_01_5474208	Pv01	5474208	Pv2.1_01_5474208_C/T	C	T	0.00432647	0.0960591	203	0.28123	0.530413	-1.9492
Pv2.1_08_62663266	Pv08	62663266	Pv2.1_08_62663266_T/A	T	A	0.00446698	0.248768	203	0.280999	0.540603	-1.39211
Pv2.1_03_1336990	Pv03	1336990	Pv2.1_03_1336990_G/A	G	A	0.00447083	0.35468	203	0.280993	0.540603	-1.41851
Pv2.1_03_190315	Pv03	190315	Pv2.1_03_190315_C/T	C	T	0.00457714	0.352217	203	0.280823	0.549693	-1.53285
Pv2.1_11_50063903	Pv011	50063903	Pv2.1_11_50063903_A/T	A	T	0.00466541	0.130542	203	0.280686	0.556507	1.49238
Pv2.1_08_62853410	Pv08	62853410	Pv2.1_08_62853410_T/A	T	A	0.0051517	0.438424	203	0.279972	0.608187	1.31385
Pv2.1_03_1991791	Pv03	1991791	Pv2.1_03_1991791_A/G	A	G	0.00543423	0.216749	203	0.279589	0.608187	-1.41988
Pv2.1_03_1991811	Pv03	1991811	Pv2.1_03_1991811_A/G	A	G	0.00543423	0.216749	203	0.279589	0.608187	-1.41988
Pv2.1_03_1991812	Pv03	1991812	Pv2.1_03_1991812_G/A	G	A	0.00543423	0.216749	203	0.279589	0.608187	-1.41988
Pv2.1_03_1991827	Pv03	1991827	Pv2.1_03_1991827_C/A	C	A	0.00543423	0.216749	203	0.279589	0.608187	-1.41988
Pv2.1_03_1991890	Pv03	1991890	Pv2.1_03_1991890_T/C	T	C	0.00543423	0.216749	203	0.279589	0.608187	-1.41988
Pv2.1_03_1991896	Pv03	1991896	Pv2.1_03_1991896_A/G	A	G	0.00543423	0.216749	203	0.279589	0.608187	-1.41988
Pv2.1_03_1991901	Pv03	1991901	Pv2.1_03_1991901_G/A	G	A	0.00543423	0.216749	203	0.279589	0.608187	-1.41988
Pv2.1_03_2003155	Pv03	2003155	Pv2.1_03_2003155_A/G	A	G	0.00543423	0.216749	203	0.279589	0.608187	-1.41988
Pv2.1_03_2001942	Pv03	2001942	Pv2.1_03_2001942_C/T	C	T	0.00545201	0.219212	203	0.279565	0.608187	-1.44682
Pv2.1_03_1303436	Pv03	1303436	Pv2.1_03_1303436_T/G	T	G	0.00551206	0.352217	203	0.279487	0.608187	-1.40141
Pv2.1_03_1303451	Pv03	1303451	Pv2.1_03_1303451_T/C	T	C	0.00551206	0.352217	203	0.279487	0.608187	-1.40141
Pv2.1_07_32673492	Pv07	32673492	Pv2.1_07_32673492_T/C	T	C	0.00557479	0.475369	203	0.279406	0.611288	-1.5192
Pv2.1_03_2029839	Pv03	2029839	Pv2.1_03_2029839_T/A	T	A	0.00578566	0.219212	203	0.27914	0.621533	-1.41141
Pv2.1_09_14033859	Pv09	14033859	Pv2.1_09_14033859_G/A	G	A	0.00580905	0.0837438	203	0.279111	0.621533	1.70254
Pv2.1_09_14034041	Pv09	14034041	Pv2.1_09_14034041_T/C	T	C	0.00580905	0.0837438	203	0.279111	0.621533	1.70254
Pv2.1_09_14041994	Pv09	14041994	Pv2.1_09_14041994_T/G	T	G	0.00580905	0.0837438	203	0.279111	0.621533	1.70254
Pv2.1_03_190374	Pv03	190374	Pv2.1_03_190374_A/G	A	G	0.00595634	0.349754	203	0.278931	0.633453	-1.47916
Pv2.1_08_60451285	Pv08	60451285	Pv2.1_08_60451285_T/C	T	C	0.00617919	0.376847	203	0.278669	0.653218	1.31072
Pv2.1_03_2006121	Pv03	2006121	Pv2.1_03_2006121_A/G	A	G	0.00628623	0.219212	203	0.278546	0.660578	-1.39168
Pv2.1_08_62732944	Pv08	62732944	Pv2.1_08_62732944_A/G	A	G	0.00668329	0.26601	203	0.278109	0.692678	-1.43035
Pv2.1_03_2006050	Pv03	2006050	Pv2.1_03_2006050_T/A	T	A	0.00670412	0.221675	203	0.278087	0.692678	-1.38232
Pv2.1_03_2003296	Pv03	2003296	Pv2.1_03_2003296_T/C	T	C	0.00680414	0.221675	203	0.277981	0.692678	-1.36872
Pv2.1_07_32673723	Pv07	32673723	Pv2.1_07_32673723_A/C	A	C	0.00682712	0.472906	203	0.277957	0.692678	-1.46951
Pv2.1_07_32673725	Pv07	32673725	Pv2.1_07_32673725_T/G	T	G	0.00682712	0.472906	203	0.277957	0.692678	-1.46951
Pv2.1_07_32673743	Pv07	32673743	Pv2.1_07_32673743_A/C	A	C	0.00682712	0.472906	203	0.277957	0.692678	-1.46951
Pv2.1_03_186991	Pv03	186991	Pv2.1_03_186991_A/G	A	G	0.0070331	0.344828	203	0.277745	0.709499	1.45807
Pv2.1_07_32234533	Pv07	32234533	Pv2.1_07_32234533_G/A	G	A	0.00744141	0.3867	203	0.277344	0.736804	1.46085
Pv2.1_02_30639738	Pv02	30639738	Pv2.1_02_30639738_A/G	A	G	0.00744482	0.162562	203	0.277341	0.736804	-1.4078
Pv2.1_03_1337048	Pv03	1337048	Pv2.1_03_1337048_T/A	T	A	0.00747071	0.347291	203	0.277316	0.736804	-1.33595
Pv2.1_03_1337051	Pv03	1337051	Pv2.1_03_1337051_A/G	A	G	0.00747071	0.347291	203	0.277316	0.736804	-1.33595
Pv2.1_08_60887669	Pv08	60887669	Pv2.1_08_60887669_T/G	T	G	0.00788848	0.300493	203	0.27693	0.773684	-1.31105
Pv2.1_04_41740002	Pv04	41740002	Pv2.1_04_41740002_G/T	G	T	0.00817294	0.194581	203	0.276679	0.797156	-1.27647
Pv2.1_08_62661010	Pv08	62661010	Pv2.1_08_62661010_G/C	G	C	0.00838148	0.238916	203	0.2765	0.807199	-1.32579
Pv2.1_08_60448228	Pv08	60448228	Pv2.1_08_60448228_G/C	G	C	0.00844374	0.342365	203	0.276448	0.807199	1.27751
Pv2.1_08_60874359	Pv08	60874359	Pv2.1_08_60874359_C/T	C	T	0.00845881	0.305419	203	0.276435	0.807199	-1.27239
Pv2.1_08_60874376	Pv08	60874376	Pv2.1_08_60874376_C/T	C	T	0.00845881	0.305419	203	0.276435	0.807199	-1.27239
Pv2.1_02_48453090	Pv02	48453090	Pv2.1_02_48453090_C/A	C	A	0.00866974	0.374384	203	0.276261	0.816428	1.19757
Pv2.1_08_62838284	Pv08	62838284	Pv2.1_08_62838284_G/A	G	A	0.00872068	0.374384	203	0.276219	0.816428	-1.26081
Pv2.1_07_30170545	Pv07	30170545	Pv2.1_07_30170545_T/G	T	G	0.0087405	0.091133	203	0.276203	0.816428	1.75644
Pv2.1_07_30170546	Pv07	30170546	Pv2.1_07_30170546_A/T	A	T	0.0087405	0.091133	203	0.276203	0.816428	1.75644
Pv2.1_07_32658494	Pv07	32658494	Pv2.1_07_32658494_T/C	T	C	0.00901758	0.472906	203	0.275983	0.837875	-1.41742
Pv2.1_02_48417686	Pv02	48417686	Pv2.1_02_48417686_T/C	T	C	0.00927718	0.374384	203	0.275782	0.857484	-1.19584
Pv2.1_08_62733113	Pv08	62733113	Pv2.1_08_62733113_T/C	T	C	0.00940147	0.280788	203	0.275689	0.864445	-1.32316
Pv2.1_07_32675024	Pv07	32675024	Pv2.1_07_32675024_C/T	C	T	0.00964427	0.487685	203	0.275509	0.871205	-1.43192
Pv2.1_03_816528	Pv03	816528	Pv2.1_03_816528_C/G	C	G	0.00966752	0.423645	203	0.275492	0.871205	-1.2484
Pv2.1_03_816534	Pv03	816534	Pv2.1_03_816534_G/T	G	T	0.00966752	0.423645	203	0.275492	0.871205	-1.2484
Pv2.1_08_60889481	Pv08	60889481	Pv2.1_08_60889481_T/G	T	G	0.00971393	0.305419	203	0.275458	0.871205	-1.24756
Pv2.1_07_34447184	Pv07	34447184	Pv2.1_07_34447184_T/A	T	A	0.00977107	0.0985222	203	0.275417	0.871205	1.67818
Pv2.1_07_34462694	Pv07	34462694	Pv2.1_07_34462694_C/G	C	G	0.00977107	0.0985222	203	0.275417	0.871205	-1.67818
Pv2.1_01_11350361	Pv01	11350361	Pv2.1_01_11350361_A/T	A	T	0.00996644	0.110837	203	0.275277	0.884158	1.60681
Pv2.1_07_32234499	Pv07	32234499	Pv2.1_07_32234499_C/T	C	T	0.0100376	0.389163	203	0.275227	0.88602	1.42577
Pv2.1_08_62853666	Pv08	62853666	Pv2.1_08_62853666_T/C	T	C	0.0103452	0.374384	203	0.275015	0.908629	-1.21975
Pv2.1_10_41983120	Pv010	41983120	Pv2.1_10_41983120_G/T	G	T	0.010598	0.0566502	203	0.274845	0.916352	-1.89716
Pv2.1_10_41985483	Pv010	41985483	Pv2.1_10_41985483_A/G	A	G	0.010598	0.0566502	203	0.274845	0.916352	-1.89716
Pv2.1_01_47052830	Pv01	47052830	Pv2.1_01_47052830_T/A	T	A	0.0106408	0.0935961	203	0.274817	0.916352	1.5138
Pv2.1_01_47052831	Pv01	47052831	Pv2.1_01_47052831_C/A	C	A	0.0106408	0.0935961	203	0.274817	0.916352	1.5138
Pv2.1_04_44825791	Pv04	44825791	Pv2.1_04_44825791_C/T	C	T	0.0106943	0.211823	203	0.274782	0.916488	-1.29207
Pv2.1_11_49896427	Pv011	49896427	Pv2.1_11_49896427_A/T	A	T	0.0108663	0.123153	203	0.27467	0.926734	-1.38326
Pv2.1_03_1214997	Pv03	1214997	Pv2.1_03_1214997_A/G	A	G	0.0114446	0.359606	203	0.274306	0.971365	-1.28391
Pv2.1_09_20882211	Pv09	20882211	Pv2.1_09_20882211_G/T	G	T	0.0115938	0.12069	203	0.274215	0.976236	-1.41107
Pv2.1_08_54849409	Pv08	54849409	Pv2.1_08_54849409_C/T	C	T	0.0116126	0.236453	203	0.274204	0.976236	1.00352
Pv2.1_11_1349920	Pv011	1349920	Pv2.1_11_1349920_C/T	C	T	0.011776	0.0295567	203	0.274106	0.985276	2.671
Pv2.1_03_1340854	Pv03	1340854	Pv2.1_03_1340854_T/G	T	G	0.0120421	0.359606	203	0.27395	0.988987	-1.26509
Pv2.1_03_1340888	Pv03	1340888	Pv2.1_03_1340888_T/A	T	A	0.0120421	0.359606	203	0.27395	0.988987	-1.26509
Pv2.1_08_62787568	Pv08	62787568	Pv2.1_08_62787568_G/C	G	C	0.0124721	0.241379	203	0.273705	0.988987	-1.2317
Pv2.1_01_5641713	Pv01	5641713	Pv2.1_01_5641713_C/T	C	T	0.0126059	0.0960591	203	0.27363	0.988987	-1.63559
Pv2.1_01_5641736	Pv01	5641736	Pv2.1_01_5641736_C/T	C	T	0.0126059	0.0960591	203	0.27363	0.988987	-1.63559
Pv2.1_08_60838487	Pv08	60838487	Pv2.1_08_60838487_G/C	G	C	0.0126236	0.300493	203	0.27362	0.988987	-1.27158
Pv2.1_09_14081833	Pv09	14081833	Pv2.1_09_14081833_G/T	G	T	0.012698	0.08867	203	0.273579	0.988987	-1.52211
Pv2.1_09_14060500	Pv09	14060500	Pv2.1_09_14060500_C/T	C	T	0.012698	0.08867	203	0.273579	0.988987	1.52211
Pv2.1_09_14084796	Pv09	14084796	Pv2.1_09_14084796_A/G	A	G	0.012698	0.08867	203	0.273579	0.988987	1.52211
Pv2.1_09_14084902	Pv09	14084902	Pv2.1_09_14084902_C/A	C	A	0.012698	0.08867	203	0.273579	0.988987	1.52211
Pv2.1_09_14106674	Pv09	14106674	Pv2.1_09_14106674_A/T	A	T	0.012698	0.08867	203	0.273579	0.988987	1.52211
Pv2.1_07_39861960	Pv07	39861960	Pv2.1_07_39861960_C/T	C	T	0.0128604	0.243842	203	0.273491	0.988987	1.09452
Pv2.1_08_62043203	Pv08	62043203	Pv2.1_08_62043203_A/C	A	C	0.0128915	0.463054	203	0.273474	0.988987	-1.35692
Pv2.1_04_41777236	Pv04	41777236	Pv2.1_04_41777236_T/C	T	C	0.013064	0.204433	203	0.273381	0.988987	-1.19834
Pv2.1_08_62662815	Pv08	62662815	Pv2.1_08_62662815_C/T	C	T	0.013183	0.470443	203	0.273318	0.988987	1.1991
Pv2.1_04_2138242	Pv04	2138242	Pv2.1_04_2138242_T/C	T	C	0.0132349	0.374384	203	0.273291	0.988987	-1.11296
Pv2.1_04_2138487	Pv04	2138487	Pv2.1_04_2138487_A/G	A	G	0.0132349	0.374384	203	0.273291	0.988987	-1.11296
Pv2.1_04_2138509	Pv04	2138509	Pv2.1_04_2138509_C/G	C	G	0.0132349	0.374384	203	0.273291	0.988987	-1.11296
Pv2.1_08_54849410	Pv08	54849410	Pv2.1_08_54849410_T/C	T	C	0.0135513	0.238916	203	0.273126	0.988987	0.978211
Pv2.1_05_32387918	Pv05	32387918	Pv2.1_05_32387918_T/A	T	A	0.0136852	0.413793	203	0.273058	0.988987	0.983361
Pv2.1_08_61502178	Pv08	61502178	Pv2.1_08_61502178_A/G	A	G	0.0137002	0.458128	203	0.27305	0.988987	-1.30428
Pv2.1_11_50063877	Pv011	50063877	Pv2.1_11_50063877_A/T	A	T	0.0137719	0.135468	203	0.273014	0.988987	1.27865
Pv2.1_08_51592946	Pv08	51592946	Pv2.1_08_51592946_C/T	C	T	0.0143559	0.26601	203	0.272725	0.988987	-1.19432
Pv2.1_10_5317234	Pv010	5317234	Pv2.1_10_5317234_A/G	A	G	0.0145681	0.0714286	203	0.272623	0.988987	1.9052
Pv2.1_11_50054854	Pv011	50054854	Pv2.1_11_50054854_G/A	G	A	0.0149578	0.142857	203	0.27244	0.988987	1.26806
Pv2.1_08_61502892	Pv08	61502892	Pv2.1_08_61502892_G/C	G	C	0.0149863	0.463054	203	0.272427	0.988987	1.2951
Pv2.1_02_48539658	Pv02	48539658	Pv2.1_02_48539658_C/T	C	T	0.0150708	0.369458	203	0.272388	0.988987	1.10161
Pv2.1_08_62807439	Pv08	62807439	Pv2.1_08_62807439_C/T	C	T	0.0153897	0.438424	203	0.272242	0.988987	-1.10556
Pv2.1_11_50035713	Pv011	50035713	Pv2.1_11_50035713_T/C	T	C	0.0154131	0.142857	203	0.272232	0.988987	1.23224
Pv2.1_01_5641669	Pv01	5641669	Pv2.1_01_5641669_G/A	G	A	0.0156865	0.0985222	203	0.27211	0.988987	-1.5745
Pv2.1_02_48321198	Pv02	48321198	Pv2.1_02_48321198_A/C	A	C	0.0157738	0.384236	203	0.272072	0.988987	-1.11059
Pv2.1_02_48321226	Pv02	48321226	Pv2.1_02_48321226_G/T	G	T	0.0157738	0.384236	203	0.272072	0.988987	-1.11059
Pv2.1_02_48321243	Pv02	48321243	Pv2.1_02_48321243_C/T	C	T	0.0157738	0.384236	203	0.272072	0.988987	-1.11059
Pv2.1_02_48346984	Pv02	48346984	Pv2.1_02_48346984_G/A	G	A	0.0157738	0.384236	203	0.272072	0.988987	-1.11059
Pv2.1_02_48347010	Pv02	48347010	Pv2.1_02_48347010_A/G	A	G	0.0157738	0.384236	203	0.272072	0.988987	1.11059
Pv2.1_02_48347015	Pv02	48347015	Pv2.1_02_48347015_A/T	A	T	0.0157738	0.384236	203	0.272072	0.988987	1.11059
Pv2.1_08_60451159	Pv08	60451159	Pv2.1_08_60451159_C/T	C	T	0.016066	0.337438	203	0.271945	0.988987	1.21121
Pv2.1_08_35501128	Pv08	35501128	Pv2.1_08_35501128_T/C	T	C	0.0162941	0.357143	203	0.271847	0.988987	1.13029
Pv2.1_08_61503123	Pv08	61503123	Pv2.1_08_61503123_A/G	A	G	0.016496	0.408867	203	0.271762	0.988987	1.23974
Pv2.1_07_39870467	Pv07	39870467	Pv2.1_07_39870467_G/C	G	C	0.0169139	0.23399	203	0.271589	0.988987	1.07231
Pv2.1_07_39870491	Pv07	39870491	Pv2.1_07_39870491_T/A	T	A	0.0169139	0.23399	203	0.271589	0.988987	1.07231
Pv2.1_09_14082844	Pv09	14082844	Pv2.1_09_14082844_C/T	C	T	0.0175009	0.0862069	203	0.271354	0.988987	1.49318
Pv2.1_02_48682281	Pv02	48682281	Pv2.1_02_48682281_T/C	T	C	0.0180281	0.389163	203	0.271149	0.988987	1.12114
Pv2.1_07_33580187	Pv07	33580187	Pv2.1_07_33580187_C/T	C	T	0.0180318	0.0985222	203	0.271148	0.988987	1.53888
Pv2.1_02_48347081	Pv02	48347081	Pv2.1_02_48347081_T/A	T	A	0.0181055	0.37931	203	0.27112	0.988987	-1.0826
Pv2.1_07_32722975	Pv07	32722975	Pv2.1_07_32722975_A/T	A	T	0.018411	0.46798	203	0.271005	0.988987	1.33115
Pv2.1_08_60504126	Pv08	60504126	Pv2.1_08_60504126_G/C	G	C	0.0185819	0.497537	203	0.270941	0.988987	1.09422
Pv2.1_01_6516947	Pv01	6516947	Pv2.1_01_6516947_G/A	G	A	0.0186522	0.100985	203	0.270915	0.988987	-1.54935
Pv2.1_01_6516974	Pv01	6516974	Pv2.1_01_6516974_C/A	C	A	0.0186522	0.100985	203	0.270915	0.988987	-1.54935
Pv2.1_02_48719788	Pv02	48719788	Pv2.1_02_48719788_T/C	T	C	0.018798	0.399015	203	0.270862	0.988987	-1.101
Pv2.1_08_37668781	Pv08	37668781	Pv2.1_08_37668781_G/C	G	C	0.0188689	0.369458	203	0.270836	0.988987	1.11669
Pv2.1_07_39862112	Pv07	39862112	Pv2.1_07_39862112_T/C	T	C	0.0188721	0.238916	203	0.270835	0.988987	1.0565
Pv2.1_11_50054929	Pv011	50054929	Pv2.1_11_50054929_C/T	C	T	0.0191307	0.140394	203	0.270741	0.988987	1.20347
Pv2.1_01_5619921	Pv01	5619921	Pv2.1_01_5619921_A/G	A	G	0.019378	0.100985	203	0.270653	0.988987	-1.55138
Pv2.1_01_5619923	Pv01	5619923	Pv2.1_01_5619923_A/G	A	G	0.019378	0.100985	203	0.270653	0.988987	-1.55138
Pv2.1_01_5641860	Pv01	5641860	Pv2.1_01_5641860_T/C	T	C	0.019378	0.100985	203	0.270653	0.988987	-1.55138
Pv2.1_02_48346957	Pv02	48346957	Pv2.1_02_48346957_A/G	A	G	0.0193816	0.381773	203	0.270652	0.988987	1.06669
Pv2.1_02_48346961	Pv02	48346961	Pv2.1_02_48346961_G/C	G	C	0.0193816	0.381773	203	0.270652	0.988987	1.06669
Pv2.1_01_992724	Pv01	992724	Pv2.1_01_992724_A/T	A	T	0.0194507	0.211823	203	0.270627	0.988987	1.28086
Pv2.1_07_38987107	Pv07	38987107	Pv2.1_07_38987107_A/C	A	C	0.0195852	0.0935961	203	0.27058	0.988987	1.70418
Pv2.1_07_38987108	Pv07	38987108	Pv2.1_07_38987108_G/A	G	A	0.0195852	0.0935961	203	0.27058	0.988987	1.70418
Pv2.1_07_38987136	Pv07	38987136	Pv2.1_07_38987136_C/T	C	T	0.0195852	0.0935961	203	0.27058	0.988987	1.70418
Pv2.1_11_49693143	Pv011	49693143	Pv2.1_11_49693143_A/G	A	G	0.019662	0.130542	203	0.270553	0.988987	1.25792
Pv2.1_08_61503075	Pv08	61503075	Pv2.1_08_61503075_A/G	A	G	0.0197594	0.458128	203	0.270519	0.988987	-1.22022
Pv2.1_08_61503069	Pv08	61503069	Pv2.1_08_61503069_T/A	T	A	0.0197594	0.458128	203	0.270519	0.988987	1.22022
Pv2.1_07_180141	Pv07	180141	Pv2.1_07_180141_A/C	A	C	0.0198549	0.123153	203	0.270486	0.988987	-1.56345
Pv2.1_08_61445512	Pv08	61445512	Pv2.1_08_61445512_T/C	T	C	0.0198618	0.263547	203	0.270484	0.988987	-1.21053
Pv2.1_03_1168762	Pv03	1168762	Pv2.1_03_1168762_T/C	T	C	0.0199432	0.357143	203	0.270456	0.988987	-1.1886
Pv2.1_10_42019985	Pv010	42019985	Pv2.1_10_42019985_A/T	A	T	0.0200228	0.0492611	203	0.270429	0.988987	1.82796
Pv2.1_03_1303175	Pv03	1303175	Pv2.1_03_1303175_T/C	T	C	0.0200256	0.352217	203	0.270428	0.988987	-1.18592
Pv2.1_08_61501189	Pv08	61501189	Pv2.1_08_61501189_T/A	T	A	0.0200403	0.408867	203	0.270423	0.988987	-1.20349
Pv2.1_09_29085332	Pv09	29085332	Pv2.1_09_29085332_G/A	G	A	0.0201845	0.152709	203	0.270373	0.988987	-1.13542
Pv2.1_07_33616200	Pv07	33616200	Pv2.1_07_33616200_C/A	C	A	0.0205554	0.100985	203	0.270249	0.988987	1.5354
Pv2.1_01_1005658	Pv01	1005658	Pv2.1_01_1005658_T/C	T	C	0.0205754	0.216749	203	0.270242	0.988987	-1.23839
Pv2.1_01_1005686	Pv01	1005686	Pv2.1_01_1005686_A/C	A	C	0.0205754	0.216749	203	0.270242	0.988987	-1.23839
Pv2.1_01_992050	Pv01	992050	Pv2.1_01_992050_T/A	T	A	0.0205754	0.216749	203	0.270242	0.988987	1.23839
Pv2.1_04_8324966	Pv04	8324966	Pv2.1_04_8324966_A/T	A	T	0.0205856	0.110837	203	0.270239	0.988987	-1.60398
Pv2.1_04_8339912	Pv04	8339912	Pv2.1_04_8339912_C/T	C	T	0.0205856	0.110837	203	0.270239	0.988987	-1.60398
Pv2.1_04_7972986	Pv04	7972986	Pv2.1_04_7972986_C/T	C	T	0.0206028	0.108374	203	0.270233	0.988987	-1.60956
Pv2.1_04_8333965	Pv04	8333965	Pv2.1_04_8333965_A/T	A	T	0.0206028	0.108374	203	0.270233	0.988987	-1.60956
Pv2.1_04_8641006	Pv04	8641006	Pv2.1_04_8641006_G/A	G	A	0.0206028	0.108374	203	0.270233	0.988987	-1.60956
Pv2.1_04_7950783	Pv04	7950783	Pv2.1_04_7950783_T/G	T	G	0.0206028	0.108374	203	0.270233	0.988987	1.60956
Pv2.1_04_8471863	Pv04	8471863	Pv2.1_04_8471863_T/A	T	A	0.0206028	0.108374	203	0.270233	0.988987	1.60956
Pv2.1_07_9346504	Pv07	9346504	Pv2.1_07_9346504_A/G	A	G	0.0207006	0.497537	203	0.270201	0.988987	-1.06816
Pv2.1_07_34448064	Pv07	34448064	Pv2.1_07_34448064_C/G	C	G	0.0207635	0.0985222	203	0.27018	0.988987	1.58236
Pv2.1_07_9309955	Pv07	9309955	Pv2.1_07_9309955_A/T	A	T	0.0208929	0.492611	203	0.270137	0.988987	-1.09549
Pv2.1_11_49714876	Pv011	49714876	Pv2.1_11_49714876_T/C	T	C	0.0218336	0.123153	203	0.269836	0.988987	1.27608
Pv2.1_02_48736095	Pv02	48736095	Pv2.1_02_48736095_A/G	A	G	0.021843	0.391626	203	0.269833	0.988987	1.07451
Pv2.1_08_62807760	Pv08	62807760	Pv2.1_08_62807760_T/G	T	G	0.0219757	0.366995	203	0.269792	0.988987	-1.11534
Pv2.1_02_48290465	Pv02	48290465	Pv2.1_02_48290465_T/G	T	G	0.0219981	0.3867	203	0.269785	0.988987	1.05154
Pv2.1_02_48290470	Pv02	48290470	Pv2.1_02_48290470_T/G	T	G	0.0219981	0.3867	203	0.269785	0.988987	1.05154
Pv2.1_07_180030	Pv07	180030	Pv2.1_07_180030_A/G	A	G	0.0221239	0.123153	203	0.269746	0.988987	-1.52562
Pv2.1_07_184372	Pv07	184372	Pv2.1_07_184372_T/A	T	A	0.0221239	0.123153	203	0.269746	0.988987	-1.52562
Pv2.1_07_9229646	Pv07	9229646	Pv2.1_07_9229646_T/C	T	C	0.0223218	0.150246	203	0.269685	0.988987	1.27614
Pv2.1_01_1000696	Pv01	1000696	Pv2.1_01_1000696_C/T	C	T	0.0225924	0.214286	203	0.269603	0.988987	1.23074
Pv2.1_01_1009040	Pv01	1009040	Pv2.1_01_1009040_C/T	C	T	0.0225924	0.214286	203	0.269603	0.988987	1.23074
Pv2.1_01_1009043	Pv01	1009043	Pv2.1_01_1009043_C/G	C	G	0.0225924	0.214286	203	0.269603	0.988987	1.23074
Pv2.1_04_43641306	Pv04	43641306	Pv2.1_04_43641306_T/C	T	C	0.0228169	0.044335	203	0.269536	0.988987	1.85595
Pv2.1_07_184255	Pv07	184255	Pv2.1_07_184255_A/T	A	T	0.0229368	0.12069	203	0.2695	0.988987	-1.5425
Pv2.1_07_184258	Pv07	184258	Pv2.1_07_184258_A/T	A	T	0.0229368	0.12069	203	0.2695	0.988987	-1.5425
Pv2.1_02_48736237	Pv02	48736237	Pv2.1_02_48736237_G/A	G	A	0.0230887	0.408867	203	0.269455	0.988987	1.0615
Pv2.1_01_955952	Pv01	955952	Pv2.1_01_955952_T/A	T	A	0.0232211	0.44335	203	0.269416	0.988987	0.940671
Pv2.1_02_48720848	Pv02	48720848	Pv2.1_02_48720848_C/T	C	T	0.0232491	0.394089	203	0.269408	0.988987	1.06105
Pv2.1_02_48720995	Pv02	48720995	Pv2.1_02_48720995_A/T	A	T	0.0232491	0.394089	203	0.269408	0.988987	1.06105
Pv2.1_04_8717201	Pv04	8717201	Pv2.1_04_8717201_A/G	A	G	0.0234982	0.1133	203	0.269335	0.988987	-1.52848
Pv2.1_02_48755405	Pv02	48755405	Pv2.1_02_48755405_T/C	T	C	0.0235927	0.399015	203	0.269308	0.988987	1.05642
Pv2.1_02_48755406	Pv02	48755406	Pv2.1_02_48755406_A/C	A	C	0.0235927	0.399015	203	0.269308	0.988987	1.05642
Pv2.1_02_48763416	Pv02	48763416	Pv2.1_02_48763416_T/A	T	A	0.0238083	0.401478	203	0.269246	0.988987	1.07171
Pv2.1_02_48763417	Pv02	48763417	Pv2.1_02_48763417_G/A	G	A	0.0238083	0.401478	203	0.269246	0.988987	1.07171
Pv2.1_11_50090488	Pv011	50090488	Pv2.1_11_50090488_G/T	G	T	0.0239525	0.140394	203	0.269205	0.988987	1.18237
Pv2.1_08_62838311	Pv08	62838311	Pv2.1_08_62838311_A/G	A	G	0.0239901	0.46798	203	0.269194	0.988987	-1.07029
Pv2.1_07_32673643	Pv07	32673643	Pv2.1_07_32673643_T/A	T	A	0.0240575	0.091133	203	0.269175	0.988987	1.48802
Pv2.1_05_35669274	Pv05	35669274	Pv2.1_05_35669274_T/G	T	G	0.0242672	0.263547	203	0.269116	0.988987	-1.02962
Pv2.1_02_48736106	Pv02	48736106	Pv2.1_02_48736106_A/G	A	G	0.0243608	0.3867	203	0.26909	0.988987	1.05624
Pv2.1_08_62082085	Pv08	62082085	Pv2.1_08_62082085_T/A	T	A	0.024365	0.08867	203	0.269089	0.988987	1.99138
Pv2.1_07_9326964	Pv07	9326964	Pv2.1_07_9326964_G/T	G	T	0.0243936	0.413793	203	0.269081	0.988987	1.06436
Pv2.1_08_62239565	Pv08	62239565	Pv2.1_08_62239565_C/T	C	T	0.0254035	0.470443	203	0.268806	0.988987	-1.15846
Pv2.1_07_32693307	Pv07	32693307	Pv2.1_07_32693307_A/G	A	G	0.0255436	0.0837438	203	0.268768	0.988987	-1.49134
Pv2.1_07_32693250	Pv07	32693250	Pv2.1_07_32693250_G/A	G	A	0.0255436	0.0837438	203	0.268768	0.988987	1.49134
Pv2.1_07_32693309	Pv07	32693309	Pv2.1_07_32693309_C/A	C	A	0.0255436	0.0837438	203	0.268768	0.988987	1.49134
Pv2.1_11_49896748	Pv011	49896748	Pv2.1_11_49896748_T/C	T	C	0.025545	0.137931	203	0.268768	0.988987	1.14337
Pv2.1_11_50054900	Pv011	50054900	Pv2.1_11_50054900_C/T	C	T	0.025545	0.137931	203	0.268768	0.988987	1.14337
Pv2.1_02_48696480	Pv02	48696480	Pv2.1_02_48696480_A/G	A	G	0.0257328	0.389163	203	0.268718	0.988987	1.0629
Pv2.1_01_46383217	Pv01	46383217	Pv2.1_01_46383217_G/A	G	A	0.0262577	0.0935961	203	0.268582	0.988987	1.33221
Pv2.1_04_41773896	Pv04	41773896	Pv2.1_04_41773896_C/T	C	T	0.0262658	0.204433	203	0.26858	0.988987	-1.04352
Pv2.1_07_39430	Pv07	39430	Pv2.1_07_39430_C/T	C	T	0.0266795	0.118227	203	0.268474	0.988987	-1.49864
Pv2.1_07_9346593	Pv07	9346593	Pv2.1_07_9346593_T/C	T	C	0.0267235	0.492611	203	0.268463	0.988987	-1.01427
Pv2.1_08_61450482	Pv08	61450482	Pv2.1_08_61450482_A/T	A	T	0.0271	0.317734	203	0.268368	0.988987	-1.15961
Pv2.1_07_29626923	Pv07	29626923	Pv2.1_07_29626923_T/G	T	G	0.0271728	0.137931	203	0.26835	0.988987	-1.16039
Pv2.1_01_6558305	Pv01	6558305	Pv2.1_01_6558305_T/C	T	C	0.027217	0.103448	203	0.268339	0.988987	-1.39678
Pv2.1_05_35663066	Pv05	35663066	Pv2.1_05_35663066_T/C	T	C	0.0275056	0.261084	203	0.268268	0.988987	-1.01173
Pv2.1_02_48776262	Pv02	48776262	Pv2.1_02_48776262_T/C	T	C	0.0275262	0.401478	203	0.268263	0.988987	1.04768
Pv2.1_02_48776265	Pv02	48776265	Pv2.1_02_48776265_T/C	T	C	0.0275262	0.401478	203	0.268263	0.988987	1.04768
Pv2.1_01_46498415	Pv01	46498415	Pv2.1_01_46498415_T/G	T	G	0.0276663	0.091133	203	0.268228	0.988987	1.34978
Pv2.1_01_980487	Pv01	980487	Pv2.1_01_980487_A/G	A	G	0.027784	0.20936	203	0.2682	0.988987	1.20428
Pv2.1_01_5559095	Pv01	5559095	Pv2.1_01_5559095_T/C	T	C	0.0280087	0.0935961	203	0.268145	0.988987	-1.4374
Pv2.1_01_5559097	Pv01	5559097	Pv2.1_01_5559097_T/C	T	C	0.0280087	0.0935961	203	0.268145	0.988987	-1.4374
Pv2.1_01_5559135	Pv01	5559135	Pv2.1_01_5559135_T/C	T	C	0.0280087	0.0935961	203	0.268145	0.988987	-1.4374
Pv2.1_01_5562634	Pv01	5562634	Pv2.1_01_5562634_T/C	T	C	0.0280087	0.0935961	203	0.268145	0.988987	-1.4374
Pv2.1_01_5562657	Pv01	5562657	Pv2.1_01_5562657_G/A	G	A	0.0280087	0.0935961	203	0.268145	0.988987	-1.4374
Pv2.1_01_5562694	Pv01	5562694	Pv2.1_01_5562694_G/A	G	A	0.0280087	0.0935961	203	0.268145	0.988987	-1.4374
Pv2.1_01_5570781	Pv01	5570781	Pv2.1_01_5570781_A/G	A	G	0.0280087	0.0935961	203	0.268145	0.988987	-1.4374
Pv2.1_01_5645079	Pv01	5645079	Pv2.1_01_5645079_G/A	G	A	0.0280087	0.0935961	203	0.268145	0.988987	-1.4374
Pv2.1_01_992793	Pv01	992793	Pv2.1_01_992793_A/G	A	G	0.0281802	0.211823	203	0.268104	0.988987	1.20782
Pv2.1_01_6482680	Pv01	6482680	Pv2.1_01_6482680_T/G	T	G	0.0283369	0.103448	203	0.268067	0.988987	-1.41776
Pv2.1_08_62753698	Pv08	62753698	Pv2.1_08_62753698_T/C	T	C	0.0285017	0.349754	203	0.268027	0.988987	-1.02877
Pv2.1_01_1002626	Pv01	1002626	Pv2.1_01_1002626_T/C	T	C	0.0285063	0.226601	203	0.268026	0.988987	1.11659
Pv2.1_01_1002644	Pv01	1002644	Pv2.1_01_1002644_A/C	A	C	0.0285063	0.226601	203	0.268026	0.988987	1.11659
Pv2.1_01_1002653	Pv01	1002653	Pv2.1_01_1002653_A/T	A	T	0.0285063	0.226601	203	0.268026	0.988987	1.11659
Pv2.1_05_152246	Pv05	152246	Pv2.1_05_152246_G/A	G	A	0.0289126	0.123153	203	0.267931	0.988987	-1.17446
Pv2.1_05_152182	Pv05	152182	Pv2.1_05_152182_A/T	A	T	0.0289126	0.123153	203	0.267931	0.988987	1.17446
Pv2.1_05_152218	Pv05	152218	Pv2.1_05_152218_C/T	C	T	0.0289126	0.123153	203	0.267931	0.988987	1.17446
Pv2.1_05_153532	Pv05	153532	Pv2.1_05_153532_A/T	A	T	0.0289126	0.123153	203	0.267931	0.988987	1.17446
Pv2.1_08_9426823	Pv08	9426823	Pv2.1_08_9426823_G/A	G	A	0.0289723	0.110837	203	0.267917	0.988987	1.47185
Pv2.1_04_41774132	Pv04	41774132	Pv2.1_04_41774132_A/T	A	T	0.0291551	0.20936	203	0.267875	0.988987	-1.02125
Pv2.1_04_45113793	Pv04	45113793	Pv2.1_04_45113793_G/A	G	A	0.0292581	0.384236	203	0.267851	0.988987	-0.91216
Pv2.1_07_9346327	Pv07	9346327	Pv2.1_07_9346327_G/A	G	A	0.0292911	0.490148	203	0.267843	0.988987	-1.02628
Pv2.1_07_188386	Pv07	188386	Pv2.1_07_188386_T/G	T	G	0.0295222	0.118227	203	0.26779	0.988987	-1.51633
Pv2.1_10_42209279	Pv010	42209279	Pv2.1_10_42209279_G/T	G	T	0.0295818	0.300493	203	0.267777	0.988987	0.99029
Pv2.1_10_42209549	Pv010	42209549	Pv2.1_10_42209549_T/C	T	C	0.0295818	0.300493	203	0.267777	0.988987	0.99029
Pv2.1_04_7949850	Pv04	7949850	Pv2.1_04_7949850_G/A	G	A	0.0298019	0.118227	203	0.267727	0.988987	-1.4418
Pv2.1_01_1059348	Pv01	1059348	Pv2.1_01_1059348_C/T	C	T	0.0298949	0.206897	203	0.267706	0.988987	1.21206
Pv2.1_04_43640862	Pv04	43640862	Pv2.1_04_43640862_T/A	T	A	0.0299371	0.0320197	203	0.267697	0.988987	-2.14294
Pv2.1_02_48295300	Pv02	48295300	Pv2.1_02_48295300_G/A	G	A	0.0301174	0.389163	203	0.267656	0.988987	0.999348
Pv2.1_08_61500922	Pv08	61500922	Pv2.1_08_61500922_A/G	A	G	0.0309769	0.413793	203	0.267467	0.988987	-1.12157
Pv2.1_08_62430982	Pv08	62430982	Pv2.1_08_62430982_T/A	T	A	0.0310993	0.275862	203	0.267441	0.988987	-1.19521
Pv2.1_02_30436238	Pv02	30436238	Pv2.1_02_30436238_G/A	G	A	0.0313671	0.487685	203	0.267383	0.988987	0.884108
Pv2.1_09_13933890	Pv09	13933890	Pv2.1_09_13933890_G/A	G	A	0.0315411	0.142857	203	0.267346	0.988987	-1.27274
Pv2.1_09_13940749	Pv09	13940749	Pv2.1_09_13940749_T/A	T	A	0.0315411	0.142857	203	0.267346	0.988987	-1.27274
Pv2.1_07_39862128	Pv07	39862128	Pv2.1_07_39862128_A/T	A	T	0.0315844	0.253695	203	0.267337	0.988987	0.944069
Pv2.1_08_62827048	Pv08	62827048	Pv2.1_08_62827048_C/G	C	G	0.0316537	0.0985222	203	0.267322	0.988987	1.75105
Pv2.1_08_62552934	Pv08	62552934	Pv2.1_08_62552934_G/A	G	A	0.0317411	0.147783	203	0.267304	0.988987	-1.33922
Pv2.1_07_38986900	Pv07	38986900	Pv2.1_07_38986900_G/A	G	A	0.03196	0.0960591	203	0.267257	0.988987	1.57623
Pv2.1_07_38986937	Pv07	38986937	Pv2.1_07_38986937_C/T	C	T	0.03196	0.0960591	203	0.267257	0.988987	1.57623
Pv2.1_07_38986938	Pv07	38986938	Pv2.1_07_38986938_C/T	C	T	0.03196	0.0960591	203	0.267257	0.988987	1.57623
Pv2.1_07_38986950	Pv07	38986950	Pv2.1_07_38986950_A/G	A	G	0.03196	0.0960591	203	0.267257	0.988987	1.57623
Pv2.1_07_38986995	Pv07	38986995	Pv2.1_07_38986995_C/G	C	G	0.03196	0.0960591	203	0.267257	0.988987	1.57623
Pv2.1_07_38987037	Pv07	38987037	Pv2.1_07_38987037_A/G	A	G	0.03196	0.0960591	203	0.267257	0.988987	1.57623
Pv2.1_05_152546	Pv05	152546	Pv2.1_05_152546_A/C	A	C	0.0321075	0.12069	203	0.267227	0.988987	1.16388
Pv2.1_05_152575	Pv05	152575	Pv2.1_05_152575_A/C	A	C	0.0321075	0.12069	203	0.267227	0.988987	1.16388
Pv2.1_05_152586	Pv05	152586	Pv2.1_05_152586_G/T	G	T	0.0321075	0.12069	203	0.267227	0.988987	1.16388
Pv2.1_07_54250	Pv07	54250	Pv2.1_07_54250_A/G	A	G	0.0321213	0.123153	203	0.267224	0.988987	-1.46145
Pv2.1_07_97948	Pv07	97948	Pv2.1_07_97948_G/C	G	C	0.0321213	0.123153	203	0.267224	0.988987	-1.46145
Pv2.1_08_62895183	Pv08	62895183	Pv2.1_08_62895183_C/G	C	G	0.0321645	0.310345	203	0.267215	0.988987	-0.965641
Pv2.1_08_62895194	Pv08	62895194	Pv2.1_08_62895194_C/T	C	T	0.0321645	0.310345	203	0.267215	0.988987	-0.965641
Pv2.1_08_62239449	Pv08	62239449	Pv2.1_08_62239449_G/C	G	C	0.0321693	0.472906	203	0.267214	0.988987	-1.10834
Pv2.1_02_48324858	Pv02	48324858	Pv2.1_02_48324858_C/A	C	A	0.0323049	0.3867	203	0.267186	0.988987	0.986106
Pv2.1_07_38946804	Pv07	38946804	Pv2.1_07_38946804_T/G	T	G	0.0323733	0.0788177	203	0.267171	0.988987	1.71136
Pv2.1_07_36691269	Pv07	36691269	Pv2.1_07_36691269_T/C	T	C	0.0323778	0.408867	203	0.26717	0.988987	1.0106
Pv2.1_02_30380020	Pv02	30380020	Pv2.1_02_30380020_G/C	G	C	0.0323828	0.497537	203	0.267169	0.988987	0.867799
Pv2.1_08_62239404	Pv08	62239404	Pv2.1_08_62239404_T/C	T	C	0.0325431	0.46798	203	0.267136	0.988987	-1.11541
Pv2.1_01_46382463	Pv01	46382463	Pv2.1_01_46382463_A/C	A	C	0.0326622	0.0985222	203	0.267112	0.988987	1.24227
Pv2.1_01_46404737	Pv01	46404737	Pv2.1_01_46404737_C/G	C	G	0.0326622	0.0985222	203	0.267112	0.988987	1.24227
Pv2.1_01_46426418	Pv01	46426418	Pv2.1_01_46426418_C/T	C	T	0.0326622	0.0985222	203	0.267112	0.988987	1.24227
Pv2.1_01_46476617	Pv01	46476617	Pv2.1_01_46476617_T/A	T	A	0.0326622	0.0985222	203	0.267112	0.988987	1.24227
Pv2.1_01_46498251	Pv01	46498251	Pv2.1_01_46498251_T/A	T	A	0.0326622	0.0985222	203	0.267112	0.988987	1.24227
Pv2.1_01_46498284	Pv01	46498284	Pv2.1_01_46498284_A/T	A	T	0.0326622	0.0985222	203	0.267112	0.988987	1.24227
Pv2.1_01_46379980	Pv01	46379980	Pv2.1_01_46379980_G/C	G	C	0.0326622	0.0985222	203	0.267112	0.988987	-1.24227
Pv2.1_01_46504115	Pv01	46504115	Pv2.1_01_46504115_T/C	T	C	0.0326622	0.0985222	203	0.267112	0.988987	-1.24227
Pv2.1_07_189067	Pv07	189067	Pv2.1_07_189067_A/G	A	G	0.0328549	0.118227	203	0.267072	0.988987	-1.47354
Pv2.1_07_189094	Pv07	189094	Pv2.1_07_189094_T/C	T	C	0.0328549	0.118227	203	0.267072	0.988987	-1.47354
Pv2.1_07_36687466	Pv07	36687466	Pv2.1_07_36687466_T/G	T	G	0.0328653	0.403941	203	0.26707	0.988987	1.0133
Pv2.1_08_62727864	Pv08	62727864	Pv2.1_08_62727864_C/T	C	T	0.0328826	0.426108	203	0.267067	0.988987	-1.00075
Pv2.1_02_48315169	Pv02	48315169	Pv2.1_02_48315169_C/G	C	G	0.0329291	0.391626	203	0.267057	0.988987	0.987427
Pv2.1_01_18035794	Pv01	18035794	Pv2.1_01_18035794_G/A	G	A	0.0330939	0.091133	203	0.267024	0.988987	-1.40952
Pv2.1_02_48290482	Pv02	48290482	Pv2.1_02_48290482_T/A	T	A	0.0331593	0.391626	203	0.267011	0.988987	0.984162
Pv2.1_08_62731528	Pv08	62731528	Pv2.1_08_62731528_G/A	G	A	0.0332432	0.428571	203	0.266994	0.988987	-1.00041
Pv2.1_08_62731571	Pv08	62731571	Pv2.1_08_62731571_A/G	A	G	0.0332432	0.428571	203	0.266994	0.988987	-1.00041
Pv2.1_09_14534237	Pv09	14534237	Pv2.1_09_14534237_G/A	G	A	0.0332527	0.231527	203	0.266992	0.988987	0.874665
Pv2.1_01_4620921	Pv01	4620921	Pv2.1_01_4620921_G/T	G	T	0.0332983	0.123153	203	0.266983	0.988987	1.23182
Pv2.1_06_25490436	Pv06	25490436	Pv2.1_06_25490436_A/G	A	G	0.0335033	0.0689655	203	0.266942	0.988987	-1.31549
Pv2.1_06_25490437	Pv06	25490437	Pv2.1_06_25490437_A/C	A	C	0.0335033	0.0689655	203	0.266942	0.988987	-1.31549
Pv2.1_03_816465	Pv03	816465	Pv2.1_03_816465_G/C	G	C	0.0337722	0.428571	203	0.266888	0.988987	-0.989676
Pv2.1_03_816489	Pv03	816489	Pv2.1_03_816489_G/C	G	C	0.0337722	0.428571	203	0.266888	0.988987	-0.989676
Pv2.1_11_5177837	Pv011	5177837	Pv2.1_11_5177837_C/A	C	A	0.033837	0.179803	203	0.266875	0.988987	1.10483
Pv2.1_11_49674477	Pv011	49674477	Pv2.1_11_49674477_A/T	A	T	0.0339593	0.221675	203	0.266851	0.988987	-0.931665
Pv2.1_11_49674486	Pv011	49674486	Pv2.1_11_49674486_A/C	A	C	0.0339593	0.221675	203	0.266851	0.988987	-0.931665
Pv2.1_01_5530659	Pv01	5530659	Pv2.1_01_5530659_G/T	G	T	0.0340962	0.0960591	203	0.266824	0.988987	-1.37734
Pv2.1_02_48687716	Pv02	48687716	Pv2.1_02_48687716_A/G	A	G	0.0341429	0.3867	203	0.266815	0.988987	0.994476
Pv2.1_08_62042601	Pv08	62042601	Pv2.1_08_62042601_C/T	C	T	0.0341877	0.325123	203	0.266807	0.988987	-1.08656
Pv2.1_08_62042713	Pv08	62042713	Pv2.1_08_62042713_A/C	A	C	0.0341877	0.325123	203	0.266807	0.988987	1.08656
Pv2.1_08_62895179	Pv08	62895179	Pv2.1_08_62895179_A/T	A	T	0.0342106	0.248768	203	0.266802	0.988987	-0.994728
Pv2.1_08_13219522	Pv08	13219522	Pv2.1_08_13219522_G/A	G	A	0.0342962	0.399015	203	0.266785	0.988987	1.04595
Pv2.1_11_52435864	Pv011	52435864	Pv2.1_11_52435864_A/G	A	G	0.0343834	0.445813	203	0.266768	0.988987	-0.940653
Pv2.1_01_6523866	Pv01	6523866	Pv2.1_01_6523866_G/A	G	A	0.0343857	0.0985222	203	0.266768	0.988987	-1.38896
Pv2.1_10_3885917	Pv010	3885917	Pv2.1_10_3885917_C/A	C	A	0.0344427	0.448276	203	0.266757	0.988987	0.92348
Pv2.1_10_3885933	Pv010	3885933	Pv2.1_10_3885933_T/A	T	A	0.0344427	0.448276	203	0.266757	0.988987	0.92348
Pv2.1_10_4917942	Pv010	4917942	Pv2.1_10_4917942_A/T	A	T	0.0352027	0.0591133	203	0.266611	0.988987	-1.64002
Pv2.1_07_594329	Pv07	594329	Pv2.1_07_594329_A/G	A	G	0.0353633	0.125616	203	0.266581	0.988987	-1.39181
Pv2.1_02_48755210	Pv02	48755210	Pv2.1_02_48755210_C/G	C	G	0.0355717	0.408867	203	0.266542	0.988987	0.981866
Pv2.1_02_48755216	Pv02	48755216	Pv2.1_02_48755216_T/A	T	A	0.0355717	0.408867	203	0.266542	0.988987	0.981866
Pv2.1_08_61450420	Pv08	61450420	Pv2.1_08_61450420_G/A	G	A	0.0356378	0.263547	203	0.266529	0.988987	-1.09377
Pv2.1_08_62787892	Pv08	62787892	Pv2.1_08_62787892_A/T	A	T	0.03565	0.46798	203	0.266527	0.988987	1.00745
Pv2.1_02_30434774	Pv02	30434774	Pv2.1_02_30434774_G/A	G	A	0.0356577	0.497537	203	0.266526	0.988987	0.846842
Pv2.1_02_30434777	Pv02	30434777	Pv2.1_02_30434777_T/C	T	C	0.0356577	0.497537	203	0.266526	0.988987	0.846842
Pv2.1_02_30435031	Pv02	30435031	Pv2.1_02_30435031_C/A	C	A	0.0356577	0.497537	203	0.266526	0.988987	0.846842
Pv2.1_02_30523269	Pv02	30523269	Pv2.1_02_30523269_G/A	G	A	0.0356577	0.497537	203	0.266526	0.988987	0.846842
Pv2.1_07_9346592	Pv07	9346592	Pv2.1_07_9346592_G/T	G	T	0.0356792	0.418719	203	0.266522	0.988987	0.98452
Pv2.1_07_9346601	Pv07	9346601	Pv2.1_07_9346601_G/T	G	T	0.0356792	0.418719	203	0.266522	0.988987	0.98452
Pv2.1_01_46425173	Pv01	46425173	Pv2.1_01_46425173_C/G	C	G	0.0361623	0.0960591	203	0.266432	0.988987	1.22822
Pv2.1_01_46498263	Pv01	46498263	Pv2.1_01_46498263_T/A	T	A	0.0361623	0.0960591	203	0.266432	0.988987	1.22822
Pv2.1_08_62895077	Pv08	62895077	Pv2.1_08_62895077_T/C	T	C	0.0362767	0.241379	203	0.266411	0.988987	-1.00451
Pv2.1_02_48763312	Pv02	48763312	Pv2.1_02_48763312_T/C	T	C	0.0363777	0.413793	203	0.266392	0.988987	0.966495
Pv2.1_02_48763353	Pv02	48763353	Pv2.1_02_48763353_A/G	A	G	0.0363777	0.413793	203	0.266392	0.988987	0.966495
Pv2.1_02_48755486	Pv02	48755486	Pv2.1_02_48755486_T/G	T	G	0.0363777	0.413793	203	0.266392	0.988987	-0.966495
Pv2.1_02_48763286	Pv02	48763286	Pv2.1_02_48763286_T/C	T	C	0.0363777	0.413793	203	0.266392	0.988987	-0.966495
Pv2.1_05_298542	Pv05	298542	Pv2.1_05_298542_C/T	C	T	0.0364055	0.130542	203	0.266387	0.988987	1.10876
Pv2.1_01_6502156	Pv01	6502156	Pv2.1_01_6502156_C/A	C	A	0.0364923	0.103448	203	0.266372	0.988987	-1.32817
Pv2.1_01_6502160	Pv01	6502160	Pv2.1_01_6502160_G/A	G	A	0.0364923	0.103448	203	0.266372	0.988987	-1.32817
Pv2.1_01_6502176	Pv01	6502176	Pv2.1_01_6502176_A/T	A	T	0.0364923	0.103448	203	0.266372	0.988987	-1.32817
Pv2.1_01_6502178	Pv01	6502178	Pv2.1_01_6502178_T/A	T	A	0.0364923	0.103448	203	0.266372	0.988987	-1.32817
Pv2.1_07_9346509	Pv07	9346509	Pv2.1_07_9346509_G/T	G	T	0.0367264	0.418719	203	0.266329	0.988987	0.985308
Pv2.1_08_14477570	Pv08	14477570	Pv2.1_08_14477570_C/G	C	G	0.036827	0.403941	203	0.266311	0.988987	0.953309
Pv2.1_08_14690813	Pv08	14690813	Pv2.1_08_14690813_T/C	T	C	0.0369808	0.391626	203	0.266283	0.988987	1.01407
Pv2.1_04_44730769	Pv04	44730769	Pv2.1_04_44730769_C/T	C	T	0.036994	0.214286	203	0.266281	0.988987	-1.02074
Pv2.1_01_1100329	Pv01	1100329	Pv2.1_01_1100329_A/T	A	T	0.0370605	0.20936	203	0.266269	0.988987	1.11283
Pv2.1_07_24934	Pv07	24934	Pv2.1_07_24934_T/A	T	A	0.0371381	0.12069	203	0.266255	0.988987	-1.43568
Pv2.1_07_77762	Pv07	77762	Pv2.1_07_77762_C/G	C	G	0.0371381	0.12069	203	0.266255	0.988987	-1.43568
Pv2.1_02_30638340	Pv02	30638340	Pv2.1_02_30638340_A/C	A	C	0.0373245	0.487685	203	0.266222	0.988987	-0.835627
Pv2.1_04_8454022	Pv04	8454022	Pv2.1_04_8454022_A/T	A	T	0.0373694	0.110837	203	0.266214	0.988987	-1.44006
Pv2.1_02_48776274	Pv02	48776274	Pv2.1_02_48776274_A/T	A	T	0.0373822	0.408867	203	0.266211	0.988987	0.977107
Pv2.1_11_5272264	Pv011	5272264	Pv2.1_11_5272264_G/A	G	A	0.0375557	0.184729	203	0.26618	0.988987	1.05647
Pv2.1_09_36533215	Pv09	36533215	Pv2.1_09_36533215_A/T	A	T	0.037631	0.157635	203	0.266167	0.988987	1.22077
Pv2.1_08_36404833	Pv08	36404833	Pv2.1_08_36404833_G/A	G	A	0.0377701	0.0837438	203	0.266143	0.988987	1.31839
Pv2.1_04_279346	Pv04	279346	Pv2.1_04_279346_A/C	A	C	0.0381035	0.142857	203	0.266084	0.988987	-1.12394
Pv2.1_10_3885893	Pv010	3885893	Pv2.1_10_3885893_T/C	T	C	0.0381346	0.453202	203	0.266079	0.988987	0.898566
Pv2.1_01_1000726	Pv01	1000726	Pv2.1_01_1000726_G/T	G	T	0.038256	0.211823	203	0.266058	0.988987	1.13675
Pv2.1_01_46498330	Pv01	46498330	Pv2.1_01_46498330_T/G	T	G	0.0384466	0.0935961	203	0.266025	0.988987	1.23897
Pv2.1_07_38863655	Pv07	38863655	Pv2.1_07_38863655_A/T	A	T	0.0385052	0.0960591	203	0.266015	0.988987	1.5457
Pv2.1_11_5173392	Pv011	5173392	Pv2.1_11_5173392_T/C	T	C	0.038532	0.182266	203	0.26601	0.988987	1.0404
Pv2.1_11_5176086	Pv011	5176086	Pv2.1_11_5176086_A/G	A	G	0.038532	0.182266	203	0.26601	0.988987	1.0404
Pv2.1_11_5176119	Pv011	5176119	Pv2.1_11_5176119_G/A	G	A	0.038532	0.182266	203	0.26601	0.988987	-1.0404
Pv2.1_02_30526000	Pv02	30526000	Pv2.1_02_30526000_C/T	C	T	0.038544	0.399015	203	0.266008	0.988987	-0.905394
Pv2.1_04_7660725	Pv04	7660725	Pv2.1_04_7660725_A/G	A	G	0.0387041	0.1133	203	0.26598	0.988987	1.39386
Pv2.1_08_62753875	Pv08	62753875	Pv2.1_08_62753875_A/G	A	G	0.0387626	0.278325	203	0.26597	0.988987	-1.04471
Pv2.1_08_4996328	Pv08	4996328	Pv2.1_08_4996328_G/A	G	A	0.0388682	0.426108	203	0.265952	0.988987	0.874381
Pv2.1_07_9261288	Pv07	9261288	Pv2.1_07_9261288_A/G	A	G	0.0390407	0.472906	203	0.265923	0.988987	-0.966571
Pv2.1_07_9261289	Pv07	9261289	Pv2.1_07_9261289_A/G	A	G	0.0390407	0.472906	203	0.265923	0.988987	-0.966571
Pv2.1_02_40132809	Pv02	40132809	Pv2.1_02_40132809_C/A	C	A	0.0393018	0.08867	203	0.265879	0.988987	-1.45546
Pv2.1_02_40132813	Pv02	40132813	Pv2.1_02_40132813_G/T	G	T	0.0393018	0.08867	203	0.265879	0.988987	-1.45546
Pv2.1_02_30525844	Pv02	30525844	Pv2.1_02_30525844_A/T	A	T	0.0393049	0.487685	203	0.265878	0.988987	0.845205
Pv2.1_07_39995715	Pv07	39995715	Pv2.1_07_39995715_T/G	T	G	0.0396847	0.123153	203	0.265815	0.988987	-1.1562
Pv2.1_10_43782340	Pv010	43782340	Pv2.1_10_43782340_T/G	T	G	0.0397034	0.108374	203	0.265811	0.988987	1.32434
Pv2.1_10_43782359	Pv010	43782359	Pv2.1_10_43782359_T/G	T	G	0.0397034	0.108374	203	0.265811	0.988987	1.32434
Pv2.1_10_43796610	Pv010	43796610	Pv2.1_10_43796610_T/C	T	C	0.0397034	0.108374	203	0.265811	0.988987	1.32434
Pv2.1_10_43819232	Pv010	43819232	Pv2.1_10_43819232_G/A	G	A	0.0397034	0.108374	203	0.265811	0.988987	1.32434
Pv2.1_08_62838551	Pv08	62838551	Pv2.1_08_62838551_T/G	T	G	0.0398766	0.339901	203	0.265783	0.988987	-0.985455
Pv2.1_08_62838552	Pv08	62838552	Pv2.1_08_62838552_G/A	G	A	0.0398766	0.339901	203	0.265783	0.988987	-0.985455
Pv2.1_07_9346499	Pv07	9346499	Pv2.1_07_9346499_C/T	C	T	0.0399352	0.421182	203	0.265773	0.988987	0.966789
Pv2.1_08_62807553	Pv08	62807553	Pv2.1_08_62807553_G/A	G	A	0.0399535	0.46798	203	0.26577	0.988987	0.993643
Pv2.1_07_33560301	Pv07	33560301	Pv2.1_07_33560301_A/T	A	T	0.0399634	0.103448	203	0.265768	0.988987	1.40507
Pv2.1_02_30520856	Pv02	30520856	Pv2.1_02_30520856_G/T	G	T	0.0401661	0.492611	203	0.265735	0.988987	-0.821976
Pv2.1_01_46404614	Pv01	46404614	Pv2.1_01_46404614_G/T	G	T	0.0403356	0.0935961	203	0.265707	0.988987	1.2204
Pv2.1_08_62573405	Pv08	62573405	Pv2.1_08_62573405_T/A	T	A	0.0403888	0.157635	203	0.265698	0.988987	-1.25889
Pv2.1_08_58524563	Pv08	58524563	Pv2.1_08_58524563_T/G	T	G	0.0407953	0.0369458	203	0.265632	0.988987	2.26465
Pv2.1_08_62533637	Pv08	62533637	Pv2.1_08_62533637_T/G	T	G	0.0408652	0.438424	203	0.265621	0.988987	1.02421
Pv2.1_02_40106863	Pv02	40106863	Pv2.1_02_40106863_A/T	A	T	0.0410086	0.08867	203	0.265597	0.988987	-1.48617
Pv2.1_09_13933700	Pv09	13933700	Pv2.1_09_13933700_T/C	T	C	0.0410378	0.14532	203	0.265593	0.988987	-1.20686
Pv2.1_08_62850185	Pv08	62850185	Pv2.1_08_62850185_A/G	A	G	0.0410905	0.339901	203	0.265584	0.988987	-0.96346
Pv2.1_07_39886207	Pv07	39886207	Pv2.1_07_39886207_A/G	A	G	0.0411473	0.241379	203	0.265575	0.988987	0.901729
Pv2.1_07_39886221	Pv07	39886221	Pv2.1_07_39886221_A/C	A	C	0.0411473	0.241379	203	0.265575	0.988987	0.901729
Pv2.1_08_9410002	Pv08	9410002	Pv2.1_08_9410002_A/G	A	G	0.0412534	0.1133	203	0.265558	0.988987	1.40625
Pv2.1_07_33560322	Pv07	33560322	Pv2.1_07_33560322_A/G	A	G	0.041446	0.105911	203	0.265527	0.988987	1.37036
Pv2.1_07_9346625	Pv07	9346625	Pv2.1_07_9346625_C/T	C	T	0.0415672	0.497537	203	0.265508	0.988987	-0.924562
Pv2.1_11_49693108	Pv011	49693108	Pv2.1_11_49693108_G/C	G	C	0.0416032	0.231527	203	0.265502	0.988987	0.916434
Pv2.1_04_41774120	Pv04	41774120	Pv2.1_04_41774120_T/G	T	G	0.0419478	0.256158	203	0.265448	0.988987	-0.84848
Pv2.1_09_13771869	Pv09	13771869	Pv2.1_09_13771869_T/A	T	A	0.0420097	0.147783	203	0.265438	0.988987	-1.18179
Pv2.1_10_43810821	Pv010	43810821	Pv2.1_10_43810821_C/T	C	T	0.0424821	0.105911	203	0.265364	0.988987	1.32946
Pv2.1_10_43810856	Pv010	43810856	Pv2.1_10_43810856_T/C	T	C	0.0424821	0.105911	203	0.265364	0.988987	1.32946
Pv2.1_08_62868922	Pv08	62868922	Pv2.1_08_62868922_C/T	C	T	0.0427443	0.275862	203	0.265324	0.988987	-0.95006
Pv2.1_07_81654	Pv07	81654	Pv2.1_07_81654_C/T	C	T	0.0428412	0.115764	203	0.265309	0.988987	-1.41682
Pv2.1_07_81664	Pv07	81664	Pv2.1_07_81664_A/G	A	G	0.0428412	0.115764	203	0.265309	0.988987	-1.41682
Pv2.1_07_97888	Pv07	97888	Pv2.1_07_97888_A/T	A	T	0.0428412	0.115764	203	0.265309	0.988987	-1.41682
Pv2.1_01_6631826	Pv01	6631826	Pv2.1_01_6631826_T/C	T	C	0.043121	0.268473	203	0.265266	0.988987	-0.943869
Pv2.1_01_6631857	Pv01	6631857	Pv2.1_01_6631857_G/A	G	A	0.043121	0.268473	203	0.265266	0.988987	-0.943869
Pv2.1_07_32673716	Pv07	32673716	Pv2.1_07_32673716_T/G	T	G	0.043361	0.0935961	203	0.265229	0.988987	1.37982
Pv2.1_07_33548470	Pv07	33548470	Pv2.1_07_33548470_A/T	A	T	0.0435444	0.100985	203	0.265201	0.988987	1.34438
Pv2.1_07_33548566	Pv07	33548566	Pv2.1_07_33548566_C/T	C	T	0.0435444	0.100985	203	0.265201	0.988987	1.34438
Pv2.1_07_33663502	Pv07	33663502	Pv2.1_07_33663502_G/A	G	A	0.0435444	0.100985	203	0.265201	0.988987	1.34438
Pv2.1_02_28214395	Pv02	28214395	Pv2.1_02_28214395_A/T	A	T	0.0436075	0.280788	203	0.265192	0.988987	0.890283
Pv2.1_02_29882356	Pv02	29882356	Pv2.1_02_29882356_T/A	T	A	0.0436075	0.280788	203	0.265192	0.988987	0.890283
Pv2.1_01_1034649	Pv01	1034649	Pv2.1_01_1034649_T/A	T	A	0.0437981	0.20936	203	0.265163	0.988987	1.11387
Pv2.1_01_1034697	Pv01	1034697	Pv2.1_01_1034697_A/T	A	T	0.0437981	0.20936	203	0.265163	0.988987	1.11387
Pv2.1_01_1108852	Pv01	1108852	Pv2.1_01_1108852_C/T	C	T	0.0441732	0.20936	203	0.265107	0.988987	1.06723
Pv2.1_10_43814482	Pv010	43814482	Pv2.1_10_43814482_T/C	T	C	0.0442117	0.0960591	203	0.265101	0.988987	1.3725
Pv2.1_11_53551921	Pv011	53551921	Pv2.1_11_53551921_T/C	T	C	0.0442901	0.105911	203	0.26509	0.988987	-1.49963
Pv2.1_11_53551952	Pv011	53551952	Pv2.1_11_53551952_A/G	A	G	0.0442901	0.105911	203	0.26509	0.988987	-1.49963
Pv2.1_01_1099099	Pv01	1099099	Pv2.1_01_1099099_G/A	G	A	0.0442982	0.204433	203	0.265088	0.988987	1.08308
Pv2.1_01_1105083	Pv01	1105083	Pv2.1_01_1105083_G/A	G	A	0.0442982	0.204433	203	0.265088	0.988987	1.08308
Pv2.1_01_1105106	Pv01	1105106	Pv2.1_01_1105106_G/A	G	A	0.0442982	0.204433	203	0.265088	0.988987	1.08308
Pv2.1_02_30608825	Pv02	30608825	Pv2.1_02_30608825_C/T	C	T	0.0443989	0.487685	203	0.265073	0.988987	-0.801594
Pv2.1_02_30608834	Pv02	30608834	Pv2.1_02_30608834_C/T	C	T	0.0443989	0.487685	203	0.265073	0.988987	-0.801594
Pv2.1_02_48755861	Pv02	48755861	Pv2.1_02_48755861_T/G	T	G	0.0444493	0.408867	203	0.265066	0.988987	0.924452
Pv2.1_03_235034	Pv03	235034	Pv2.1_03_235034_G/C	G	C	0.0447709	0.487685	203	0.265019	0.988987	0.734321
Pv2.1_01_4852835	Pv01	4852835	Pv2.1_01_4852835_A/C	A	C	0.0449033	0.110837	203	0.264999	0.988987	1.26585
Pv2.1_01_42610727	Pv01	42610727	Pv2.1_01_42610727_C/A	C	A	0.0449752	0.130542	203	0.264989	0.988987	-1.0807
Pv2.1_02_30593499	Pv02	30593499	Pv2.1_02_30593499_A/T	A	T	0.0450555	0.497537	203	0.264977	0.988987	0.803764
Pv2.1_07_9261287	Pv07	9261287	Pv2.1_07_9261287_G/A	G	A	0.0450805	0.470443	203	0.264973	0.988987	-0.93588
Pv2.1_08_61526066	Pv08	61526066	Pv2.1_08_61526066_C/A	C	A	0.0460267	0.26601	203	0.264837	0.988987	-1.09246
Pv2.1_09_13681364	Pv09	13681364	Pv2.1_09_13681364_G/A	G	A	0.0460728	0.150246	203	0.26483	0.988987	-1.14679
Pv2.1_09_13687701	Pv09	13687701	Pv2.1_09_13687701_T/A	T	A	0.0460728	0.150246	203	0.26483	0.988987	-1.14679
Pv2.1_03_2465448	Pv03	2465448	Pv2.1_03_2465448_T/A	T	A	0.046126	0.140394	203	0.264823	0.988987	-1.13787
Pv2.1_03_2465452	Pv03	2465452	Pv2.1_03_2465452_A/G	A	G	0.046126	0.140394	203	0.264823	0.988987	-1.13787
Pv2.1_02_23064663	Pv02	23064663	Pv2.1_02_23064663_T/C	T	C	0.0462191	0.300493	203	0.264809	0.988987	1.03855
Pv2.1_08_56259534	Pv08	56259534	Pv2.1_08_56259534_T/A	T	A	0.0464707	0.152709	203	0.264774	0.988987	-0.991023
Pv2.1_04_7718367	Pv04	7718367	Pv2.1_04_7718367_C/T	C	T	0.0464728	0.118227	203	0.264773	0.988987	-1.34936
Pv2.1_04_7718517	Pv04	7718517	Pv2.1_04_7718517_A/C	A	C	0.0464728	0.118227	203	0.264773	0.988987	-1.34936
Pv2.1_07_9330384	Pv07	9330384	Pv2.1_07_9330384_C/T	C	T	0.0468948	0.423645	203	0.264714	0.988987	0.92916
Pv2.1_07_9330514	Pv07	9330514	Pv2.1_07_9330514_C/T	C	T	0.0468948	0.423645	203	0.264714	0.988987	0.92916
Pv2.1_01_1009184	Pv01	1009184	Pv2.1_01_1009184_G/A	G	A	0.0469015	0.20936	203	0.264713	0.988987	1.09614
Pv2.1_02_30043664	Pv02	30043664	Pv2.1_02_30043664_G/A	G	A	0.0474095	0.288177	203	0.264643	0.988987	0.873401
Pv2.1_07_38830177	Pv07	38830177	Pv2.1_07_38830177_A/G	A	G	0.0474923	0.0960591	203	0.264631	0.988987	1.53958
Pv2.1_08_62021990	Pv08	62021990	Pv2.1_08_62021990_C/T	C	T	0.0478946	0.369458	203	0.264576	0.988987	-1.03208
Pv2.1_02_30593664	Pv02	30593664	Pv2.1_02_30593664_C/A	C	A	0.0479236	0.495074	203	0.264572	0.988987	0.795338
Pv2.1_02_30593668	Pv02	30593668	Pv2.1_02_30593668_G/T	G	T	0.0479236	0.495074	203	0.264572	0.988987	0.795338
Pv2.1_09_36619618	Pv09	36619618	Pv2.1_09_36619618_A/G	A	G	0.0481013	0.197044	203	0.264548	0.988987	-1.04757
Pv2.1_11_53315691	Pv011	53315691	Pv2.1_11_53315691_C/T	C	T	0.0481614	0.105911	203	0.26454	0.988987	-1.48793
Pv2.1_11_53315693	Pv011	53315693	Pv2.1_11_53315693_T/A	T	A	0.0481614	0.105911	203	0.26454	0.988987	-1.48793
Pv2.1_11_53315695	Pv011	53315695	Pv2.1_11_53315695_C/T	C	T	0.0481614	0.105911	203	0.26454	0.988987	-1.48793
Pv2.1_11_53315700	Pv011	53315700	Pv2.1_11_53315700_C/T	C	T	0.0481614	0.105911	203	0.26454	0.988987	-1.48793
Pv2.1_11_53315707	Pv011	53315707	Pv2.1_11_53315707_G/T	G	T	0.0481614	0.105911	203	0.26454	0.988987	-1.48793
Pv2.1_04_45475458	Pv04	45475458	Pv2.1_04_45475458_G/A	G	A	0.0486974	0.231527	203	0.264467	0.988987	-1.11438
Pv2.1_02_40029748	Pv02	40029748	Pv2.1_02_40029748_A/T	A	T	0.0487963	0.091133	203	0.264454	0.988987	-1.39137
Pv2.1_02_40029752	Pv02	40029752	Pv2.1_02_40029752_G/T	G	T	0.0487963	0.091133	203	0.264454	0.988987	-1.39137
Pv2.1_04_11333501	Pv04	11333501	Pv2.1_04_11333501_G/A	G	A	0.0489001	0.108374	203	0.26444	0.988987	-1.34976
Pv2.1_07_194840	Pv07	194840	Pv2.1_07_194840_G/A	G	A	0.0489412	0.1133	203	0.264434	0.988987	-1.41365
Pv2.1_03_234732	Pv03	234732	Pv2.1_03_234732_A/G	A	G	0.0490093	0.389163	203	0.264425	0.988987	0.781146
Pv2.1_07_36758114	Pv07	36758114	Pv2.1_07_36758114_C/A	C	A	0.0493434	0.401478	203	0.264381	0.988987	0.967321
Pv2.1_06_27696089	Pv06	27696089	Pv2.1_06_27696089_C/T	C	T	0.0493688	0.44335	203	0.264378	0.988987	0.923362
Pv2.1_06_27696107	Pv06	27696107	Pv2.1_06_27696107_C/T	C	T	0.0493688	0.44335	203	0.264378	0.988987	0.923362
Pv2.1_06_27696117	Pv06	27696117	Pv2.1_06_27696117_A/C	A	C	0.0493688	0.44335	203	0.264378	0.988987	0.923362
Pv2.1_07_65858	Pv07	65858	Pv2.1_07_65858_T/C	T	C	0.0494251	0.1133	203	0.26437	0.988987	-1.3702
Pv2.1_07_65874	Pv07	65874	Pv2.1_07_65874_T/C	T	C	0.0494251	0.1133	203	0.26437	0.988987	-1.3702
Pv2.1_07_80599	Pv07	80599	Pv2.1_07_80599_A/T	A	T	0.0494251	0.1133	203	0.26437	0.988987	-1.3702
Pv2.1_07_81811	Pv07	81811	Pv2.1_07_81811_G/A	G	A	0.0494251	0.1133	203	0.26437	0.988987	-1.3702
Pv2.1_07_81828	Pv07	81828	Pv2.1_07_81828_G/C	G	C	0.0494251	0.1133	203	0.26437	0.988987	-1.3702
Pv2.1_07_96263	Pv07	96263	Pv2.1_07_96263_T/G	T	G	0.0494251	0.1133	203	0.26437	0.988987	-1.3702
Pv2.1_07_97543	Pv07	97543	Pv2.1_07_97543_G/A	G	A	0.0494251	0.1133	203	0.26437	0.988987	-1.3702
Pv2.1_07_106027	Pv07	106027	Pv2.1_07_106027_C/T	C	T	0.0494251	0.1133	203	0.26437	0.988987	-1.3702
Pv2.1_07_78269	Pv07	78269	Pv2.1_07_78269_T/C	T	C	0.0494251	0.1133	203	0.26437	0.988987	1.3702
Pv2.1_07_96252	Pv07	96252	Pv2.1_07_96252_G/T	G	T	0.0494251	0.1133	203	0.26437	0.988987	1.3702
Pv2.1_07_96253	Pv07	96253	Pv2.1_07_96253_A/G	A	G	0.0494251	0.1133	203	0.26437	0.988987	1.3702
Pv2.1_07_97538	Pv07	97538	Pv2.1_07_97538_G/A	G	A	0.0494251	0.1133	203	0.26437	0.988987	1.3702
Pv2.1_07_97629	Pv07	97629	Pv2.1_07_97629_T/A	T	A	0.0494251	0.1133	203	0.26437	0.988987	1.3702
Pv2.1_06_18646101	Pv06	18646101	Pv2.1_06_18646101_A/T	A	T	0.049656	0.142857	203	0.26434	0.988987	1.65566
Pv2.1_02_48724543	Pv02	48724543	Pv2.1_02_48724543_T/C	T	C	0.0500478	0.366995	203	0.264288	0.988987	0.888267
Pv2.1_01_6523837	Pv01	6523837	Pv2.1_01_6523837_G/C	G	C	0.0501148	0.100985	203	0.26428	0.988987	-1.2626
Pv2.1_01_6523841	Pv01	6523841	Pv2.1_01_6523841_C/T	C	T	0.0501148	0.100985	203	0.26428	0.988987	-1.2626
Pv2.1_08_62046627	Pv08	62046627	Pv2.1_08_62046627_G/C	G	C	0.0509379	0.270936	203	0.264173	0.988987	-1.04077
Pv2.1_08_61220200	Pv08	61220200	Pv2.1_08_61220200_T/A	T	A	0.0509565	0.0985222	203	0.264171	0.988987	-1.36122
Pv2.1_07_483681	Pv07	483681	Pv2.1_07_483681_G/A	G	A	0.051006	0.157635	203	0.264164	0.988987	1.03534
Pv2.1_07_485048	Pv07	485048	Pv2.1_07_485048_T/C	T	C	0.051006	0.157635	203	0.264164	0.988987	1.03534
Pv2.1_07_485062	Pv07	485062	Pv2.1_07_485062_C/A	C	A	0.051006	0.157635	203	0.264164	0.988987	1.03534
Pv2.1_07_485084	Pv07	485084	Pv2.1_07_485084_T/A	T	A	0.051006	0.157635	203	0.264164	0.988987	1.03534
Pv2.1_07_485213	Pv07	485213	Pv2.1_07_485213_A/C	A	C	0.051006	0.157635	203	0.264164	0.988987	1.03534
Pv2.1_04_10915712	Pv04	10915712	Pv2.1_04_10915712_A/T	A	T	0.0511431	0.105911	203	0.264147	0.988987	-1.36614
Pv2.1_04_11272001	Pv04	11272001	Pv2.1_04_11272001_A/C	A	C	0.0511431	0.105911	203	0.264147	0.988987	-1.36614
Pv2.1_10_6588632	Pv010	6588632	Pv2.1_10_6588632_A/T	A	T	0.0516002	0.472906	203	0.264089	0.988987	0.838405
Pv2.1_08_2965553	Pv08	2965553	Pv2.1_08_2965553_A/G	A	G	0.0517877	0.37931	203	0.264065	0.988987	-0.879226
Pv2.1_08_2965577	Pv08	2965577	Pv2.1_08_2965577_T/C	T	C	0.0517877	0.37931	203	0.264065	0.988987	-0.879226
Pv2.1_07_510246	Pv07	510246	Pv2.1_07_510246_A/G	A	G	0.0518434	0.401478	203	0.264058	0.988987	0.732379
Pv2.1_09_13689167	Pv09	13689167	Pv2.1_09_13689167_C/T	C	T	0.0518651	0.155172	203	0.264056	0.988987	-1.10727
Pv2.1_09_31071725	Pv09	31071725	Pv2.1_09_31071725_C/A	C	A	0.0520179	0.128079	203	0.264036	0.988987	1.16244
Pv2.1_03_1033660	Pv03	1033660	Pv2.1_03_1033660_G/A	G	A	0.052404	0.135468	203	0.263988	0.988987	1.09104
Pv2.1_02_48688260	Pv02	48688260	Pv2.1_02_48688260_T/C	T	C	0.0524884	0.357143	203	0.263978	0.988987	0.871326
Pv2.1_02_48688275	Pv02	48688275	Pv2.1_02_48688275_T/A	T	A	0.0524884	0.357143	203	0.263978	0.988987	0.871326
Pv2.1_04_43640857	Pv04	43640857	Pv2.1_04_43640857_G/C	G	C	0.0526213	0.0270936	203	0.263961	0.988987	-2.02319
Pv2.1_04_11184400	Pv04	11184400	Pv2.1_04_11184400_C/T	C	T	0.0528089	0.100985	203	0.263938	0.988987	-1.38069
Pv2.1_04_9656289	Pv04	9656289	Pv2.1_04_9656289_T/C	T	C	0.0528611	0.1133	203	0.263932	0.988987	-1.29263
Pv2.1_04_1593324	Pv04	1593324	Pv2.1_04_1593324_C/A	C	A	0.0530469	0.485222	203	0.263909	0.988987	-0.865721
Pv2.1_09_13609156	Pv09	13609156	Pv2.1_09_13609156_G/A	G	A	0.0530572	0.147783	203	0.263908	0.988987	-1.11597
Pv2.1_09_13655184	Pv09	13655184	Pv2.1_09_13655184_C/G	C	G	0.0530572	0.147783	203	0.263908	0.988987	-1.11597
Pv2.1_09_13687583	Pv09	13687583	Pv2.1_09_13687583_C/T	C	T	0.0530572	0.147783	203	0.263908	0.988987	-1.11597
Pv2.1_09_13688994	Pv09	13688994	Pv2.1_09_13688994_T/C	T	C	0.0530572	0.147783	203	0.263908	0.988987	-1.11597
Pv2.1_09_13688996	Pv09	13688996	Pv2.1_09_13688996_T/C	T	C	0.0530572	0.147783	203	0.263908	0.988987	-1.11597
Pv2.1_09_13716608	Pv09	13716608	Pv2.1_09_13716608_T/C	T	C	0.0530572	0.147783	203	0.263908	0.988987	-1.11597
Pv2.1_09_13747588	Pv09	13747588	Pv2.1_09_13747588_G/A	G	A	0.0530572	0.147783	203	0.263908	0.988987	-1.11597
Pv2.1_09_13860810	Pv09	13860810	Pv2.1_09_13860810_C/T	C	T	0.0530572	0.147783	203	0.263908	0.988987	1.11597
Pv2.1_07_40005075	Pv07	40005075	Pv2.1_07_40005075_A/T	A	T	0.053096	0.118227	203	0.263903	0.988987	1.11413
Pv2.1_07_102763	Pv07	102763	Pv2.1_07_102763_G/A	G	A	0.0531177	0.118227	203	0.2639	0.988987	-1.3376
Pv2.1_07_102786	Pv07	102786	Pv2.1_07_102786_A/G	A	G	0.0531177	0.118227	203	0.2639	0.988987	-1.3376
Pv2.1_10_5821255	Pv010	5821255	Pv2.1_10_5821255_C/T	C	T	0.0533548	0.310345	203	0.263871	0.988987	0.925199
Pv2.1_08_61456104	Pv08	61456104	Pv2.1_08_61456104_A/G	A	G	0.053797	0.270936	203	0.263818	0.988987	1.00017
Pv2.1_07_594367	Pv07	594367	Pv2.1_07_594367_T/C	T	C	0.0541608	0.12069	203	0.263774	0.988987	-1.28738
Pv2.1_07_594569	Pv07	594569	Pv2.1_07_594569_G/A	G	A	0.0541608	0.12069	203	0.263774	0.988987	-1.28738
Pv2.1_08_61901010	Pv08	61901010	Pv2.1_08_61901010_A/G	A	G	0.0542567	0.226601	203	0.263762	0.988987	1.20998
Pv2.1_07_485585	Pv07	485585	Pv2.1_07_485585_T/C	T	C	0.0544487	0.155172	203	0.263739	0.988987	1.03974
Pv2.1_03_994812	Pv03	994812	Pv2.1_03_994812_A/G	A	G	0.0547803	0.137931	203	0.2637	0.988987	1.06575
Pv2.1_03_994813	Pv03	994813	Pv2.1_03_994813_T/G	T	G	0.0547803	0.137931	203	0.2637	0.988987	1.06575
Pv2.1_03_1169617	Pv03	1169617	Pv2.1_03_1169617_G/A	G	A	0.0547868	0.305419	203	0.263699	0.988987	-0.925859
Pv2.1_03_228901	Pv03	228901	Pv2.1_03_228901_C/T	C	T	0.0552629	0.391626	203	0.263643	0.988987	0.756928
Pv2.1_03_235036	Pv03	235036	Pv2.1_03_235036_T/A	T	A	0.0552629	0.391626	203	0.263643	0.988987	0.756928
Pv2.1_03_9103256	Pv03	9103256	Pv2.1_03_9103256_G/A	G	A	0.0553795	0.231527	203	0.263629	0.988987	1.17765
Pv2.1_02_48724549	Pv02	48724549	Pv2.1_02_48724549_C/T	C	T	0.0559987	0.364532	203	0.263557	0.988987	0.864785
Pv2.1_03_2474503	Pv03	2474503	Pv2.1_03_2474503_C/T	C	T	0.0561948	0.12069	203	0.263535	0.988987	-1.20506
Pv2.1_02_40045091	Pv02	40045091	Pv2.1_02_40045091_A/T	A	T	0.0563842	0.0837438	203	0.263513	0.988987	-1.33551
Pv2.1_02_40045128	Pv02	40045128	Pv2.1_02_40045128_T/C	T	C	0.0563842	0.0837438	203	0.263513	0.988987	-1.33551
Pv2.1_02_40103834	Pv02	40103834	Pv2.1_02_40103834_A/G	A	G	0.0563842	0.0837438	203	0.263513	0.988987	-1.33551
Pv2.1_02_40104882	Pv02	40104882	Pv2.1_02_40104882_G/A	G	A	0.0563842	0.0837438	203	0.263513	0.988987	-1.33551
Pv2.1_02_40104891	Pv02	40104891	Pv2.1_02_40104891_C/T	C	T	0.0563842	0.0837438	203	0.263513	0.988987	-1.33551
Pv2.1_02_40051131	Pv02	40051131	Pv2.1_02_40051131_A/T	A	T	0.0563842	0.0837438	203	0.263513	0.988987	1.33551
Pv2.1_02_40104886	Pv02	40104886	Pv2.1_02_40104886_C/T	C	T	0.0563842	0.0837438	203	0.263513	0.988987	1.33551
Pv2.1_02_48755283	Pv02	48755283	Pv2.1_02_48755283_C/T	C	T	0.0563917	0.413793	203	0.263512	0.988987	0.890258
Pv2.1_01_725075	Pv01	725075	Pv2.1_01_725075_A/T	A	T	0.0567457	0.251232	203	0.263471	0.988987	-0.814219
Pv2.1_11_47925605	Pv011	47925605	Pv2.1_11_47925605_T/G	T	G	0.0568422	0.246305	203	0.26346	0.988987	1.08359
Pv2.1_02_39783365	Pv02	39783365	Pv2.1_02_39783365_C/T	C	T	0.0570157	0.0788177	203	0.263441	0.988987	-1.48872
Pv2.1_01_1109091	Pv01	1109091	Pv2.1_01_1109091_A/T	A	T	0.0572391	0.206897	203	0.263415	0.988987	1.00574
Pv2.1_10_43814500	Pv010	43814500	Pv2.1_10_43814500_A/G	A	G	0.0577429	0.100985	203	0.263359	0.988987	1.24222
Pv2.1_01_6523690	Pv01	6523690	Pv2.1_01_6523690_A/G	A	G	0.0577667	0.100985	203	0.263356	0.988987	-1.22476
Pv2.1_09_36508155	Pv09	36508155	Pv2.1_09_36508155_A/C	A	C	0.0578992	0.162562	203	0.263341	0.988987	1.09353
Pv2.1_09_36508167	Pv09	36508167	Pv2.1_09_36508167_T/C	T	C	0.0578992	0.162562	203	0.263341	0.988987	1.09353
Pv2.1_07_170430	Pv07	170430	Pv2.1_07_170430_C/T	C	T	0.0582106	0.399015	203	0.263306	0.988987	-0.745334
Pv2.1_08_17158846	Pv08	17158846	Pv2.1_08_17158846_A/G	A	G	0.0582875	0.305419	203	0.263298	0.988987	0.822684
Pv2.1_08_19410100	Pv08	19410100	Pv2.1_08_19410100_G/A	G	A	0.0582875	0.305419	203	0.263298	0.988987	-0.822684
Pv2.1_08_19410128	Pv08	19410128	Pv2.1_08_19410128_G/A	G	A	0.0582875	0.305419	203	0.263298	0.988987	-0.822684
Pv2.1_08_19410129	Pv08	19410129	Pv2.1_08_19410129_T/C	T	C	0.0582875	0.305419	203	0.263298	0.988987	-0.822684
Pv2.1_01_1193823	Pv01	1193823	Pv2.1_01_1193823_A/G	A	G	0.0584134	0.192118	203	0.263284	0.988987	1.04144
Pv2.1_07_34546869	Pv07	34546869	Pv2.1_07_34546869_A/T	A	T	0.0587949	0.455665	203	0.263242	0.988987	-1.07699
Pv2.1_04_10800442	Pv04	10800442	Pv2.1_04_10800442_C/T	C	T	0.0590648	0.103448	203	0.263212	0.988987	-1.32186
Pv2.1_04_11096028	Pv04	11096028	Pv2.1_04_11096028_T/C	T	C	0.0590648	0.103448	203	0.263212	0.988987	-1.32186
Pv2.1_04_11161016	Pv04	11161016	Pv2.1_04_11161016_A/G	A	G	0.0590648	0.103448	203	0.263212	0.988987	-1.32186
Pv2.1_04_11333261	Pv04	11333261	Pv2.1_04_11333261_G/A	G	A	0.0590648	0.103448	203	0.263212	0.988987	1.32186
Pv2.1_04_11333305	Pv04	11333305	Pv2.1_04_11333305_G/T	G	T	0.0590648	0.103448	203	0.263212	0.988987	1.32186
Pv2.1_04_11333335	Pv04	11333335	Pv2.1_04_11333335_G/A	G	A	0.0590648	0.103448	203	0.263212	0.988987	1.32186
Pv2.1_06_20455076	Pv06	20455076	Pv2.1_06_20455076_T/C	T	C	0.0591205	0.0960591	203	0.263206	0.988987	-1.625
Pv2.1_04_7661242	Pv04	7661242	Pv2.1_04_7661242_T/A	T	A	0.0592304	0.1133	203	0.263194	0.988987	-1.30412
Pv2.1_02_48727339	Pv02	48727339	Pv2.1_02_48727339_G/A	G	A	0.0594926	0.369458	203	0.263166	0.988987	0.854748
Pv2.1_02_48682269	Pv02	48682269	Pv2.1_02_48682269_G/A	G	A	0.0594955	0.150246	203	0.263165	0.988987	0.986681
Pv2.1_10_5855830	Pv010	5855830	Pv2.1_10_5855830_G/A	G	A	0.0599186	0.310345	203	0.26312	0.988987	0.897246
Pv2.1_09_13648106	Pv09	13648106	Pv2.1_09_13648106_C/T	C	T	0.0601671	0.152709	203	0.263093	0.988987	-1.05202
Pv2.1_09_13648109	Pv09	13648109	Pv2.1_09_13648109_C/G	C	G	0.0601671	0.152709	203	0.263093	0.988987	-1.05202
Pv2.1_09_13648111	Pv09	13648111	Pv2.1_09_13648111_G/A	G	A	0.0601671	0.152709	203	0.263093	0.988987	-1.05202
Pv2.1_09_13648113	Pv09	13648113	Pv2.1_09_13648113_G/A	G	A	0.0601671	0.152709	203	0.263093	0.988987	-1.05202
Pv2.1_11_5178006	Pv011	5178006	Pv2.1_11_5178006_A/T	A	T	0.0607611	0.187192	203	0.26303	0.988987	0.958983
Pv2.1_08_62201528	Pv08	62201528	Pv2.1_08_62201528_A/T	A	T	0.0609461	0.261084	203	0.26301	0.988987	-0.995453
Pv2.1_08_62201540	Pv08	62201540	Pv2.1_08_62201540_G/C	G	C	0.0609461	0.261084	203	0.26301	0.988987	-0.995453
Pv2.1_09_13689155	Pv09	13689155	Pv2.1_09_13689155_G/A	G	A	0.0609523	0.150246	203	0.263009	0.988987	-1.08059
Pv2.1_02_30608506	Pv02	30608506	Pv2.1_02_30608506_C/T	C	T	0.0614287	0.490148	203	0.262959	0.988987	0.758846
Pv2.1_02_2100795	Pv02	2100795	Pv2.1_02_2100795_C/G	C	G	0.0616362	0.41133	203	0.262938	0.988987	-0.77755
Pv2.1_02_2100798	Pv02	2100798	Pv2.1_02_2100798_C/G	C	G	0.0616362	0.41133	203	0.262938	0.988987	-0.77755
Pv2.1_09_36891636	Pv09	36891636	Pv2.1_09_36891636_T/C	T	C	0.0616979	0.490148	203	0.262931	0.988987	0.83084
Pv2.1_04_461858	Pv04	461858	Pv2.1_04_461858_G/A	G	A	0.0617339	0.133005	203	0.262927	0.988987	-1.07278
Pv2.1_04_515379	Pv04	515379	Pv2.1_04_515379_T/C	T	C	0.0617339	0.133005	203	0.262927	0.988987	-1.07278
Pv2.1_07_39258383	Pv07	39258383	Pv2.1_07_39258383_T/G	T	G	0.0618831	0.226601	203	0.262912	0.988987	0.895194
Pv2.1_03_37170461	Pv03	37170461	Pv2.1_03_37170461_T/G	T	G	0.0619095	0.192118	203	0.262909	0.988987	1.07989
Pv2.1_05_39742359	Pv05	39742359	Pv2.1_05_39742359_T/A	T	A	0.0622072	0.403941	203	0.262878	0.988987	-0.792603
Pv2.1_08_61220265	Pv08	61220265	Pv2.1_08_61220265_A/G	A	G	0.0622797	0.320197	203	0.262871	0.988987	-1.06099
Pv2.1_02_48688740	Pv02	48688740	Pv2.1_02_48688740_A/G	A	G	0.0624832	0.359606	203	0.26285	0.988987	0.837869
Pv2.1_03_2475808	Pv03	2475808	Pv2.1_03_2475808_T/G	T	G	0.062697	0.118227	203	0.262828	0.988987	-1.17959
Pv2.1_03_2475811	Pv03	2475811	Pv2.1_03_2475811_G/A	G	A	0.062697	0.118227	203	0.262828	0.988987	-1.17959
Pv2.1_03_2475824	Pv03	2475824	Pv2.1_03_2475824_G/A	G	A	0.062697	0.118227	203	0.262828	0.988987	-1.17959
Pv2.1_08_60442564	Pv08	60442564	Pv2.1_08_60442564_A/T	A	T	0.0627014	0.310345	203	0.262827	0.988987	0.874117
Pv2.1_07_39886067	Pv07	39886067	Pv2.1_07_39886067_C/T	C	T	0.0629234	0.251232	203	0.262805	0.988987	0.802025
Pv2.1_02_30759143	Pv02	30759143	Pv2.1_02_30759143_T/A	T	A	0.0633048	0.470443	203	0.262766	0.988987	0.738354
Pv2.1_08_17146459	Pv08	17146459	Pv2.1_08_17146459_G/A	G	A	0.0636679	0.29803	203	0.262729	0.988987	-0.812698
Pv2.1_10_5133041	Pv010	5133041	Pv2.1_10_5133041_C/T	C	T	0.0637554	0.0837438	203	0.26272	0.988987	-1.33619
Pv2.1_04_41895594	Pv04	41895594	Pv2.1_04_41895594_A/T	A	T	0.063814	0.204433	203	0.262714	0.988987	-0.900359
Pv2.1_03_41534701	Pv03	41534701	Pv2.1_03_41534701_C/A	C	A	0.0638592	0.332512	203	0.26271	0.988987	-0.843599
Pv2.1_04_9531013	Pv04	9531013	Pv2.1_04_9531013_T/C	T	C	0.0638933	0.108374	203	0.262706	0.988987	1.26141
Pv2.1_04_9656221	Pv04	9656221	Pv2.1_04_9656221_G/T	G	T	0.0638933	0.108374	203	0.262706	0.988987	1.26141
Pv2.1_07_39886358	Pv07	39886358	Pv2.1_07_39886358_A/G	A	G	0.0640105	0.256158	203	0.262695	0.988987	0.798416
Pv2.1_08_2996206	Pv08	2996206	Pv2.1_08_2996206_C/T	C	T	0.0641478	0.369458	203	0.262681	0.988987	-0.841713
Pv2.1_08_56216440	Pv08	56216440	Pv2.1_08_56216440_T/A	T	A	0.0643207	0.150246	203	0.262664	0.988987	0.954128
Pv2.1_08_56268545	Pv08	56268545	Pv2.1_08_56268545_T/C	T	C	0.0643207	0.150246	203	0.262664	0.988987	0.954128
Pv2.1_08_61254705	Pv08	61254705	Pv2.1_08_61254705_C/T	C	T	0.0643881	0.0492611	203	0.262657	0.988987	1.7515
Pv2.1_02_40052531	Pv02	40052531	Pv2.1_02_40052531_G/A	G	A	0.0645749	0.0862069	203	0.262638	0.988987	-1.29902
Pv2.1_04_45494249	Pv04	45494249	Pv2.1_04_45494249_A/G	A	G	0.0646655	0.241379	203	0.262629	0.988987	-1.00441
Pv2.1_04_45494244	Pv04	45494244	Pv2.1_04_45494244_G/A	G	A	0.0646655	0.241379	203	0.262629	0.988987	1.00441
Pv2.1_08_62868891	Pv08	62868891	Pv2.1_08_62868891_A/C	A	C	0.0647837	0.211823	203	0.262618	0.988987	0.912145
Pv2.1_11_49714860	Pv011	49714860	Pv2.1_11_49714860_A/G	A	G	0.0649717	0.221675	203	0.262599	0.988987	0.82237
Pv2.1_08_62807406	Pv08	62807406	Pv2.1_08_62807406_A/G	A	G	0.0651474	0.482759	203	0.262582	0.988987	-0.815845
Pv2.1_08_62807415	Pv08	62807415	Pv2.1_08_62807415_G/C	G	C	0.0651474	0.482759	203	0.262582	0.988987	-0.815845
Pv2.1_06_20279156	Pv06	20279156	Pv2.1_06_20279156_G/A	G	A	0.0651661	0.221675	203	0.26258	0.988987	-1.61353
Pv2.1_03_979941	Pv03	979941	Pv2.1_03_979941_C/G	C	G	0.0653468	0.137931	203	0.262562	0.988987	1.01942
Pv2.1_06_24219653	Pv06	24219653	Pv2.1_06_24219653_T/G	T	G	0.0654556	0.14532	203	0.262551	0.988987	-1.39391
Pv2.1_08_62795308	Pv08	62795308	Pv2.1_08_62795308_C/T	C	T	0.0655933	0.142857	203	0.262538	0.988987	-1.04214
Pv2.1_04_45342976	Pv04	45342976	Pv2.1_04_45342976_T/C	T	C	0.0656225	0.246305	203	0.262535	0.988987	-0.958176
Pv2.1_09_13746675	Pv09	13746675	Pv2.1_09_13746675_C/A	C	A	0.0656276	0.14532	203	0.262535	0.988987	-1.07482
Pv2.1_07_39330886	Pv07	39330886	Pv2.1_07_39330886_G/A	G	A	0.0658968	0.211823	203	0.262508	0.988987	0.913628
Pv2.1_07_39330903	Pv07	39330903	Pv2.1_07_39330903_C/T	C	T	0.0658968	0.211823	203	0.262508	0.988987	0.913628
Pv2.1_08_61264579	Pv08	61264579	Pv2.1_08_61264579_C/T	C	T	0.0659749	0.37931	203	0.262501	0.988987	0.924505
Pv2.1_08_32843412	Pv08	32843412	Pv2.1_08_32843412_G/A	G	A	0.0660637	0.320197	203	0.262492	0.988987	0.849373
Pv2.1_08_19377706	Pv08	19377706	Pv2.1_08_19377706_T/C	T	C	0.0661782	0.310345	203	0.262481	0.988987	-0.790681
Pv2.1_09_10614963	Pv09	10614963	Pv2.1_09_10614963_C/T	C	T	0.0664292	0.08867	203	0.262457	0.988987	1.10701
Pv2.1_09_10603632	Pv09	10603632	Pv2.1_09_10603632_T/A	T	A	0.0664292	0.08867	203	0.262457	0.988987	-1.10701
Pv2.1_08_16672814	Pv08	16672814	Pv2.1_08_16672814_G/A	G	A	0.0664787	0.300493	203	0.262452	0.988987	-0.803991
Pv2.1_08_16673099	Pv08	16673099	Pv2.1_08_16673099_T/C	T	C	0.0664787	0.300493	203	0.262452	0.988987	-0.803991
Pv2.1_01_1193820	Pv01	1193820	Pv2.1_01_1193820_G/A	G	A	0.0665409	0.189655	203	0.262446	0.988987	1.00798
Pv2.1_01_1193855	Pv01	1193855	Pv2.1_01_1193855_A/G	A	G	0.0665409	0.189655	203	0.262446	0.988987	1.00798
Pv2.1_06_27017801	Pv06	27017801	Pv2.1_06_27017801_T/C	T	C	0.0666511	0.396552	203	0.262436	0.988987	-0.753878
Pv2.1_04_156195	Pv04	156195	Pv2.1_04_156195_A/G	A	G	0.066698	0.128079	203	0.262431	0.988987	-1.07518
Pv2.1_04_156244	Pv04	156244	Pv2.1_04_156244_A/T	A	T	0.066698	0.128079	203	0.262431	0.988987	-1.07518
Pv2.1_08_62043105	Pv08	62043105	Pv2.1_08_62043105_T/A	T	A	0.0667124	0.174877	203	0.26243	0.988987	-1.18233
Pv2.1_09_17712054	Pv09	17712054	Pv2.1_09_17712054_T/C	T	C	0.066825	0.108374	203	0.262419	0.988987	1.01802
Pv2.1_07_34552652	Pv07	34552652	Pv2.1_07_34552652_C/A	C	A	0.0674424	0.453202	203	0.26236	0.988987	-1.04175
Pv2.1_08_17399898	Pv08	17399898	Pv2.1_08_17399898_T/G	T	G	0.0674607	0.302956	203	0.262358	0.988987	-0.80446
Pv2.1_08_62787592	Pv08	62787592	Pv2.1_08_62787592_T/C	T	C	0.0674878	0.403941	203	0.262356	0.988987	-0.816676
Pv2.1_07_206149	Pv07	206149	Pv2.1_07_206149_C/A	C	A	0.0675545	0.1133	203	0.262349	0.988987	-1.28954
Pv2.1_07_206155	Pv07	206155	Pv2.1_07_206155_T/C	T	C	0.0675545	0.1133	203	0.262349	0.988987	-1.28954
Pv2.1_07_205955	Pv07	205955	Pv2.1_07_205955_A/T	A	T	0.0675545	0.1133	203	0.262349	0.988987	1.28954
Pv2.1_02_30738330	Pv02	30738330	Pv2.1_02_30738330_A/G	A	G	0.0676267	0.463054	203	0.262343	0.988987	0.742803
Pv2.1_02_48688684	Pv02	48688684	Pv2.1_02_48688684_A/C	A	C	0.0677126	0.362069	203	0.262334	0.988987	0.838239
Pv2.1_03_3703500	Pv03	3703500	Pv2.1_03_3703500_G/A	G	A	0.0677151	0.256158	203	0.262334	0.988987	0.782176
Pv2.1_07_21496207	Pv07	21496207	Pv2.1_07_21496207_G/T	G	T	0.0677495	0.246305	203	0.262331	0.988987	0.929957
Pv2.1_03_2465328	Pv03	2465328	Pv2.1_03_2465328_T/G	T	G	0.0678088	0.128079	203	0.262325	0.988987	-1.10195
Pv2.1_03_2465313	Pv03	2465313	Pv2.1_03_2465313_G/T	G	T	0.0678088	0.128079	203	0.262325	0.988987	1.10195
Pv2.1_08_16271376	Pv08	16271376	Pv2.1_08_16271376_T/C	T	C	0.067952	0.300493	203	0.262312	0.988987	-0.830497
Pv2.1_08_61264479	Pv08	61264479	Pv2.1_08_61264479_A/G	A	G	0.0679756	0.320197	203	0.26231	0.988987	1.09792
Pv2.1_08_61825678	Pv08	61825678	Pv2.1_08_61825678_T/C	T	C	0.0680772	0.275862	203	0.2623	0.988987	1.06319
Pv2.1_08_61825711	Pv08	61825711	Pv2.1_08_61825711_A/G	A	G	0.0680772	0.275862	203	0.2623	0.988987	1.06319
Pv2.1_04_11057127	Pv04	11057127	Pv2.1_04_11057127_A/G	A	G	0.0681476	0.108374	203	0.262294	0.988987	-1.28383
Pv2.1_11_53315857	Pv011	53315857	Pv2.1_11_53315857_T/C	T	C	0.0683424	0.1133	203	0.262275	0.988987	-1.35838
Pv2.1_11_53367214	Pv011	53367214	Pv2.1_11_53367214_G/A	G	A	0.0683424	0.1133	203	0.262275	0.988987	-1.35838
Pv2.1_11_52861184	Pv011	52861184	Pv2.1_11_52861184_A/G	A	G	0.0683424	0.1133	203	0.262275	0.988987	1.35838
Pv2.1_11_52890170	Pv011	52890170	Pv2.1_11_52890170_A/G	A	G	0.0683424	0.1133	203	0.262275	0.988987	1.35838
Pv2.1_11_53315938	Pv011	53315938	Pv2.1_11_53315938_G/A	G	A	0.0683424	0.1133	203	0.262275	0.988987	1.35838
Pv2.1_08_59001908	Pv08	59001908	Pv2.1_08_59001908_A/C	A	C	0.0683673	0.0270936	203	0.262273	0.988987	2.3892
Pv2.1_09_10577134	Pv09	10577134	Pv2.1_09_10577134_G/C	G	C	0.0683908	0.08867	203	0.262271	0.988987	1.10826
Pv2.1_01_1109013	Pv01	1109013	Pv2.1_01_1109013_A/G	A	G	0.0685004	0.204433	203	0.262261	0.988987	0.970627
Pv2.1_11_53430609	Pv011	53430609	Pv2.1_11_53430609_T/C	T	C	0.0686146	0.125616	203	0.26225	0.988987	-1.34168
Pv2.1_11_53430622	Pv011	53430622	Pv2.1_11_53430622_C/T	C	T	0.0686146	0.125616	203	0.26225	0.988987	-1.34168
Pv2.1_02_2101008	Pv02	2101008	Pv2.1_02_2101008_C/G	C	G	0.068686	0.416256	203	0.262243	0.988987	-0.757063
Pv2.1_08_58446094	Pv08	58446094	Pv2.1_08_58446094_T/G	T	G	0.0687822	0.0369458	203	0.262234	0.988987	2.1322
Pv2.1_08_58446097	Pv08	58446097	Pv2.1_08_58446097_G/A	G	A	0.0687822	0.0369458	203	0.262234	0.988987	2.1322
Pv2.1_07_28923775	Pv07	28923775	Pv2.1_07_28923775_C/T	C	T	0.0688294	0.125616	203	0.26223	0.988987	-1.0118
Pv2.1_07_28923789	Pv07	28923789	Pv2.1_07_28923789_T/A	T	A	0.0688294	0.125616	203	0.26223	0.988987	-1.0118
Pv2.1_07_28923819	Pv07	28923819	Pv2.1_07_28923819_A/T	A	T	0.0688294	0.125616	203	0.26223	0.988987	-1.0118
Pv2.1_08_3086176	Pv08	3086176	Pv2.1_08_3086176_T/A	T	A	0.0690987	0.369458	203	0.262205	0.988987	-0.836156
Pv2.1_08_58524570	Pv08	58524570	Pv2.1_08_58524570_T/C	T	C	0.0694877	0.0320197	203	0.262169	0.988987	2.19985
Pv2.1_04_45784419	Pv04	45784419	Pv2.1_04_45784419_G/C	G	C	0.0698258	0.241379	203	0.262138	0.988987	1.00163
Pv2.1_04_45784407	Pv04	45784407	Pv2.1_04_45784407_G/T	G	T	0.0698258	0.241379	203	0.262138	0.988987	-1.00163
Pv2.1_10_4627862	Pv010	4627862	Pv2.1_10_4627862_T/G	T	G	0.0700037	0.315271	203	0.262122	0.988987	-1.0404
Pv2.1_02_581241	Pv02	581241	Pv2.1_02_581241_C/T	C	T	0.0701465	0.187192	203	0.262109	0.988987	-0.879768
Pv2.1_07_195160	Pv07	195160	Pv2.1_07_195160_C/T	C	T	0.0702562	0.110837	203	0.262099	0.988987	-1.3043
Pv2.1_09_30891927	Pv09	30891927	Pv2.1_09_30891927_T/G	T	G	0.0703116	0.08867	203	0.262094	0.988987	1.10812
Pv2.1_07_34543758	Pv07	34543758	Pv2.1_07_34543758_T/C	T	C	0.0704559	0.460591	203	0.262081	0.988987	-1.01561
Pv2.1_08_3575697	Pv08	3575697	Pv2.1_08_3575697_T/C	T	C	0.0709977	0.140394	203	0.262032	0.988987	1.01493
Pv2.1_08_3611939	Pv08	3611939	Pv2.1_08_3611939_T/A	T	A	0.0709977	0.140394	203	0.262032	0.988987	1.01493
Pv2.1_01_51227097	Pv01	51227097	Pv2.1_01_51227097_A/G	A	G	0.0710066	0.431034	203	0.262031	0.988987	-0.644469
Pv2.1_02_39814335	Pv02	39814335	Pv2.1_02_39814335_T/A	T	A	0.0710712	0.0812808	203	0.262026	0.988987	-1.38943
Pv2.1_08_14370616	Pv08	14370616	Pv2.1_08_14370616_C/A	C	A	0.071077	0.394089	203	0.262025	0.988987	0.843378
Pv2.1_08_55531814	Pv08	55531814	Pv2.1_08_55531814_G/C	G	C	0.071217	0.137931	203	0.262013	0.988987	0.945068
Pv2.1_09_13687641	Pv09	13687641	Pv2.1_09_13687641_T/C	T	C	0.0712351	0.14532	203	0.262011	0.988987	-1.05299
Pv2.1_08_56216458	Pv08	56216458	Pv2.1_08_56216458_C/T	C	T	0.0713079	0.155172	203	0.262004	0.988987	0.906646
Pv2.1_08_59868995	Pv08	59868995	Pv2.1_08_59868995_C/T	C	T	0.0714127	0.275862	203	0.261995	0.988987	-0.846147
Pv2.1_08_59868996	Pv08	59868996	Pv2.1_08_59868996_T/A	T	A	0.0714127	0.275862	203	0.261995	0.988987	0.846147
Pv2.1_11_52612019	Pv011	52612019	Pv2.1_11_52612019_T/C	T	C	0.0714338	0.115764	203	0.261993	0.988987	-1.3751
Pv2.1_10_5889866	Pv010	5889866	Pv2.1_10_5889866_A/C	A	C	0.0714765	0.206897	203	0.261989	0.988987	0.967131
Pv2.1_02_40032600	Pv02	40032600	Pv2.1_02_40032600_T/C	T	C	0.0715136	0.091133	203	0.261986	0.988987	-1.21645
Pv2.1_11_52861142	Pv011	52861142	Pv2.1_11_52861142_T/A	T	A	0.0715268	0.110837	203	0.261985	0.988987	-1.35933
Pv2.1_07_28915708	Pv07	28915708	Pv2.1_07_28915708_C/T	C	T	0.0716561	0.128079	203	0.261973	0.988987	-0.988983
Pv2.1_04_425495	Pv04	425495	Pv2.1_04_425495_A/T	A	T	0.0718696	0.280788	203	0.261954	0.988987	-0.79085
Pv2.1_01_2524699	Pv01	2524699	Pv2.1_01_2524699_T/G	T	G	0.0719228	0.29064	203	0.26195	0.988987	-0.851457
Pv2.1_11_52830435	Pv011	52830435	Pv2.1_11_52830435_A/G	A	G	0.0720286	0.197044	203	0.26194	0.988987	-0.918805
Pv2.1_10_5819773	Pv010	5819773	Pv2.1_10_5819773_C/T	C	T	0.0721274	0.325123	203	0.261932	0.988987	0.807946
Pv2.1_04_45494624	Pv04	45494624	Pv2.1_04_45494624_T/G	T	G	0.0721635	0.236453	203	0.261929	0.988987	-1.04524
Pv2.1_08_62807412	Pv08	62807412	Pv2.1_08_62807412_C/T	C	T	0.0725971	0.485222	203	0.26189	0.988987	-0.788186
Pv2.1_10_5809146	Pv010	5809146	Pv2.1_10_5809146_G/A	G	A	0.0726093	0.325123	203	0.261889	0.988987	0.807008
Pv2.1_10_5809186	Pv010	5809186	Pv2.1_10_5809186_A/G	A	G	0.0726093	0.325123	203	0.261889	0.988987	0.807008
Pv2.1_10_5819323	Pv010	5819323	Pv2.1_10_5819323_T/C	T	C	0.0727174	0.315271	203	0.26188	0.988987	0.835365
Pv2.1_06_28066186	Pv06	28066186	Pv2.1_06_28066186_C/T	C	T	0.0729816	0.418719	203	0.261857	0.988987	-0.920729
Pv2.1_08_2978798	Pv08	2978798	Pv2.1_08_2978798_C/T	C	T	0.0732189	0.366995	203	0.261836	0.988987	-0.815774
Pv2.1_04_3957279	Pv04	3957279	Pv2.1_04_3957279_C/G	C	G	0.0733181	0.0960591	203	0.261828	0.988987	-1.28077
Pv2.1_04_3957280	Pv04	3957280	Pv2.1_04_3957280_T/A	T	A	0.0733181	0.0960591	203	0.261828	0.988987	-1.28077
Pv2.1_04_3957297	Pv04	3957297	Pv2.1_04_3957297_G/T	G	T	0.0733181	0.0960591	203	0.261828	0.988987	-1.28077
Pv2.1_04_3964169	Pv04	3964169	Pv2.1_04_3964169_C/T	C	T	0.0733181	0.0960591	203	0.261828	0.988987	-1.28077
Pv2.1_04_3975303	Pv04	3975303	Pv2.1_04_3975303_T/G	T	G	0.0733181	0.0960591	203	0.261828	0.988987	-1.28077
Pv2.1_04_523179	Pv04	523179	Pv2.1_04_523179_C/T	C	T	0.0734661	0.135468	203	0.261815	0.988987	1.02781
Pv2.1_04_523183	Pv04	523183	Pv2.1_04_523183_A/G	A	G	0.0734661	0.135468	203	0.261815	0.988987	1.02781
Pv2.1_07_28945206	Pv07	28945206	Pv2.1_07_28945206_T/A	T	A	0.0738441	0.123153	203	0.261782	0.988987	-1.01119
Pv2.1_07_28945244	Pv07	28945244	Pv2.1_07_28945244_G/A	G	A	0.0738441	0.123153	203	0.261782	0.988987	-1.01119
Pv2.1_11_51503021	Pv011	51503021	Pv2.1_11_51503021_T/C	T	C	0.0744153	0.458128	203	0.261733	0.988987	-0.809657
Pv2.1_11_51503022	Pv011	51503022	Pv2.1_11_51503022_G/A	G	A	0.0744153	0.458128	203	0.261733	0.988987	-0.809657
Pv2.1_08_9419256	Pv08	9419256	Pv2.1_08_9419256_G/A	G	A	0.0747053	0.110837	203	0.261709	0.988987	1.16288
Pv2.1_01_51229012	Pv01	51229012	Pv2.1_01_51229012_A/T	A	T	0.0747497	0.431034	203	0.261705	0.988987	-0.637408
Pv2.1_08_62553615	Pv08	62553615	Pv2.1_08_62553615_C/T	C	T	0.0748644	0.152709	203	0.261695	0.988987	1.0893
Pv2.1_08_3611672	Pv08	3611672	Pv2.1_08_3611672_G/A	G	A	0.0749936	0.135468	203	0.261684	0.988987	1.01783
Pv2.1_08_53392886	Pv08	53392886	Pv2.1_08_53392886_C/T	C	T	0.0750032	0.261084	203	0.261683	0.988987	-0.747411
Pv2.1_04_41761707	Pv04	41761707	Pv2.1_04_41761707_T/A	T	A	0.0750768	0.256158	203	0.261677	0.988987	0.736409
Pv2.1_06_19454526	Pv06	19454526	Pv2.1_06_19454526_A/C	A	C	0.0751002	0.418719	203	0.261675	0.988987	-0.968301
Pv2.1_04_12120986	Pv04	12120986	Pv2.1_04_12120986_T/G	T	G	0.0751267	0.0960591	203	0.261673	0.988987	-1.28038
Pv2.1_05_22438889	Pv05	22438889	Pv2.1_05_22438889_G/C	G	C	0.0753094	0.243842	203	0.261658	0.988987	0.876229
Pv2.1_08_61870969	Pv08	61870969	Pv2.1_08_61870969_A/T	A	T	0.0753866	0.229064	203	0.261651	0.988987	1.11629
Pv2.1_08_61889725	Pv08	61889725	Pv2.1_08_61889725_T/C	T	C	0.0755424	0.224138	203	0.261638	0.988987	-1.04537
Pv2.1_07_10712903	Pv07	10712903	Pv2.1_07_10712903_G/A	G	A	0.0756112	0.0665025	203	0.261632	0.988987	-1.2548
Pv2.1_07_509393	Pv07	509393	Pv2.1_07_509393_A/G	A	G	0.0756202	0.150246	203	0.261632	0.988987	0.978764
Pv2.1_08_58418083	Pv08	58418083	Pv2.1_08_58418083_T/C	T	C	0.0756875	0.0344828	203	0.261626	0.988987	2.10781
Pv2.1_08_58418096	Pv08	58418096	Pv2.1_08_58418096_G/T	G	T	0.0756875	0.0344828	203	0.261626	0.988987	2.10781
Pv2.1_08_60965999	Pv08	60965999	Pv2.1_08_60965999_C/T	C	T	0.0757333	0.0295567	203	0.261622	0.988987	-2.29112
Pv2.1_08_60967854	Pv08	60967854	Pv2.1_08_60967854_G/T	G	T	0.0757333	0.0295567	203	0.261622	0.988987	-2.29112
Pv2.1_08_60973964	Pv08	60973964	Pv2.1_08_60973964_A/G	A	G	0.0757333	0.0295567	203	0.261622	0.988987	-2.29112
Pv2.1_08_60973722	Pv08	60973722	Pv2.1_08_60973722_T/G	T	G	0.0757333	0.0295567	203	0.261622	0.988987	2.29112
Pv2.1_08_60973763	Pv08	60973763	Pv2.1_08_60973763_C/A	C	A	0.0757333	0.0295567	203	0.261622	0.988987	2.29112
Pv2.1_10_5857765	Pv010	5857765	Pv2.1_10_5857765_T/G	T	G	0.0758663	0.477833	203	0.261611	0.988987	0.894981
Pv2.1_08_16674248	Pv08	16674248	Pv2.1_08_16674248_A/G	A	G	0.0761314	0.29064	203	0.261589	0.988987	-0.803177
Pv2.1_08_16674251	Pv08	16674251	Pv2.1_08_16674251_G/A	G	A	0.0761314	0.29064	203	0.261589	0.988987	-0.803177
Pv2.1_11_53295199	Pv011	53295199	Pv2.1_11_53295199_C/T	C	T	0.076191	0.110837	203	0.261584	0.988987	-1.38046
Pv2.1_11_53369430	Pv011	53369430	Pv2.1_11_53369430_G/A	G	A	0.076191	0.110837	203	0.261584	0.988987	-1.38046
Pv2.1_09_36892758	Pv09	36892758	Pv2.1_09_36892758_A/T	A	T	0.0764867	0.460591	203	0.261559	0.988987	-0.761077
Pv2.1_01_40706125	Pv01	40706125	Pv2.1_01_40706125_A/T	A	T	0.076765	0.394089	203	0.261536	0.988987	-0.743913
Pv2.1_11_52611030	Pv011	52611030	Pv2.1_11_52611030_T/C	T	C	0.0768761	0.20197	203	0.261527	0.988987	-0.948285
Pv2.1_04_2031081	Pv04	2031081	Pv2.1_04_2031081_T/A	T	A	0.0769188	0.35468	203	0.261524	0.988987	-0.851689
Pv2.1_04_2031306	Pv04	2031306	Pv2.1_04_2031306_C/G	C	G	0.0769188	0.35468	203	0.261524	0.988987	-0.851689
Pv2.1_04_2031066	Pv04	2031066	Pv2.1_04_2031066_C/T	C	T	0.0769188	0.35468	203	0.261524	0.988987	0.851689
Pv2.1_09_38095827	Pv09	38095827	Pv2.1_09_38095827_C/T	C	T	0.0771611	0.369458	203	0.261504	0.988987	0.725884
Pv2.1_02_581031	Pv02	581031	Pv2.1_02_581031_A/C	A	C	0.0771669	0.192118	203	0.261503	0.988987	-0.849066
Pv2.1_08_61671434	Pv08	61671434	Pv2.1_08_61671434_C/T	C	T	0.0772767	0.315271	203	0.261494	0.988987	0.966498
Pv2.1_04_44805189	Pv04	44805189	Pv2.1_04_44805189_A/G	A	G	0.0772864	0.103448	203	0.261494	0.988987	1.27088
Pv2.1_04_44805209	Pv04	44805209	Pv2.1_04_44805209_A/G	A	G	0.0772864	0.103448	203	0.261494	0.988987	1.27088
Pv2.1_08_60490406	Pv08	60490406	Pv2.1_08_60490406_A/G	A	G	0.077388	0.342365	203	0.261485	0.988987	-0.848394
Pv2.1_08_61891712	Pv08	61891712	Pv2.1_08_61891712_T/G	T	G	0.0774646	0.229064	203	0.261479	0.988987	-1.03933
Pv2.1_07_38945146	Pv07	38945146	Pv2.1_07_38945146_C/T	C	T	0.0775357	0.103448	203	0.261473	0.988987	1.23889
Pv2.1_07_39360899	Pv07	39360899	Pv2.1_07_39360899_A/G	A	G	0.0778375	0.211823	203	0.261449	0.988987	0.875619
Pv2.1_03_8784224	Pv03	8784224	Pv2.1_03_8784224_T/C	T	C	0.0780153	0.246305	203	0.261434	0.988987	1.05764
Pv2.1_08_61502023	Pv08	61502023	Pv2.1_08_61502023_C/G	C	G	0.078256	0.270936	203	0.261415	0.988987	0.919089
Pv2.1_09_13708513	Pv09	13708513	Pv2.1_09_13708513_C/A	C	A	0.07826	0.14532	203	0.261414	0.988987	-1.02168
Pv2.1_11_47185842	Pv011	47185842	Pv2.1_11_47185842_C/T	C	T	0.0783905	0.258621	203	0.261404	0.988987	1.03262
Pv2.1_11_47185843	Pv011	47185843	Pv2.1_11_47185843_T/C	T	C	0.0783905	0.258621	203	0.261404	0.988987	1.03262
Pv2.1_04_1743683	Pv04	1743683	Pv2.1_04_1743683_C/T	C	T	0.0784346	0.179803	203	0.2614	0.988987	0.916907
Pv2.1_04_1743707	Pv04	1743707	Pv2.1_04_1743707_T/G	T	G	0.0784346	0.179803	203	0.2614	0.988987	0.916907
Pv2.1_05_40841287	Pv05	40841287	Pv2.1_05_40841287_C/T	C	T	0.0785539	0.140394	203	0.261391	0.988987	-1.01049
Pv2.1_07_184198	Pv07	184198	Pv2.1_07_184198_C/T	C	T	0.0785935	0.280788	203	0.261388	0.988987	-0.808043
Pv2.1_07_184363	Pv07	184363	Pv2.1_07_184363_G/A	G	A	0.0785935	0.280788	203	0.261388	0.988987	-0.808043
Pv2.1_01_855624	Pv01	855624	Pv2.1_01_855624_T/C	T	C	0.0786029	0.236453	203	0.261387	0.988987	0.890218
Pv2.1_01_855626	Pv01	855626	Pv2.1_01_855626_A/G	A	G	0.0786029	0.236453	203	0.261387	0.988987	0.890218
Pv2.1_01_855629	Pv01	855629	Pv2.1_01_855629_G/A	G	A	0.0786029	0.236453	203	0.261387	0.988987	0.890218
Pv2.1_01_855607	Pv01	855607	Pv2.1_01_855607_C/T	C	T	0.0786029	0.236453	203	0.261387	0.988987	-0.890218
Pv2.1_04_11111822	Pv04	11111822	Pv2.1_04_11111822_T/A	T	A	0.078737	0.105911	203	0.261376	0.988987	-1.24625
Pv2.1_08_61825607	Pv08	61825607	Pv2.1_08_61825607_A/C	A	C	0.0789118	0.280788	203	0.261362	0.988987	-1.01341
Pv2.1_08_61825611	Pv08	61825611	Pv2.1_08_61825611_T/C	T	C	0.0789118	0.280788	203	0.261362	0.988987	1.01341
Pv2.1_08_61825638	Pv08	61825638	Pv2.1_08_61825638_G/A	G	A	0.0789118	0.280788	203	0.261362	0.988987	1.01341
Pv2.1_04_45285347	Pv04	45285347	Pv2.1_04_45285347_C/T	C	T	0.0789545	0.130542	203	0.261359	0.988987	1.04851
Pv2.1_11_52841809	Pv011	52841809	Pv2.1_11_52841809_A/T	A	T	0.0792581	0.192118	203	0.261334	0.988987	-0.95449
Pv2.1_08_17415553	Pv08	17415553	Pv2.1_08_17415553_G/A	G	A	0.0793174	0.29803	203	0.26133	0.988987	-0.806556
Pv2.1_03_53076880	Pv03	53076880	Pv2.1_03_53076880_T/G	T	G	0.0795709	0.194581	203	0.26131	0.988987	-0.932606
Pv2.1_03_53076882	Pv03	53076882	Pv2.1_03_53076882_T/G	T	G	0.0795709	0.194581	203	0.26131	0.988987	-0.932606
Pv2.1_03_53076886	Pv03	53076886	Pv2.1_03_53076886_C/T	C	T	0.0795709	0.194581	203	0.26131	0.988987	-0.932606
Pv2.1_03_53076889	Pv03	53076889	Pv2.1_03_53076889_T/C	T	C	0.0795709	0.194581	203	0.26131	0.988987	-0.932606
Pv2.1_03_53076901	Pv03	53076901	Pv2.1_03_53076901_A/C	A	C	0.0795709	0.194581	203	0.26131	0.988987	-0.932606
Pv2.1_03_53076917	Pv03	53076917	Pv2.1_03_53076917_A/G	A	G	0.0795709	0.194581	203	0.26131	0.988987	-0.932606
Pv2.1_08_62239554	Pv08	62239554	Pv2.1_08_62239554_G/C	G	C	0.079762	0.317734	203	0.261294	0.988987	-0.948033
Pv2.1_04_45663666	Pv04	45663666	Pv2.1_04_45663666_A/T	A	T	0.0800622	0.248768	203	0.261271	0.988987	-0.974449
Pv2.1_04_45663952	Pv04	45663952	Pv2.1_04_45663952_T/G	T	G	0.0800622	0.248768	203	0.261271	0.988987	-0.974449
Pv2.1_04_45670658	Pv04	45670658	Pv2.1_04_45670658_T/A	T	A	0.0800622	0.248768	203	0.261271	0.988987	-0.974449
Pv2.1_07_34553614	Pv07	34553614	Pv2.1_07_34553614_C/A	C	A	0.0801834	0.453202	203	0.261261	0.988987	-0.971455
Pv2.1_07_34553644	Pv07	34553644	Pv2.1_07_34553644_A/G	A	G	0.0801834	0.453202	203	0.261261	0.988987	-0.971455
Pv2.1_04_1371850	Pv04	1371850	Pv2.1_04_1371850_C/G	C	G	0.0802065	0.497537	203	0.261259	0.988987	-0.791339
Pv2.1_11_53431717	Pv011	53431717	Pv2.1_11_53431717_A/G	A	G	0.0802826	0.118227	203	0.261253	0.988987	-1.3198
Pv2.1_11_53431743	Pv011	53431743	Pv2.1_11_53431743_T/G	T	G	0.0802826	0.118227	203	0.261253	0.988987	-1.3198
Pv2.1_11_53440949	Pv011	53440949	Pv2.1_11_53440949_T/C	T	C	0.0802826	0.118227	203	0.261253	0.988987	-1.3198
Pv2.1_08_3706371	Pv08	3706371	Pv2.1_08_3706371_C/T	C	T	0.080367	0.391626	203	0.261247	0.988987	-0.750058
Pv2.1_07_38971209	Pv07	38971209	Pv2.1_07_38971209_A/G	A	G	0.0803943	0.08867	203	0.261245	0.988987	1.32957
Pv2.1_08_9419046	Pv08	9419046	Pv2.1_08_9419046_A/T	A	T	0.0804421	0.1133	203	0.261241	0.988987	-1.11863
Pv2.1_04_507833	Pv04	507833	Pv2.1_04_507833_T/A	T	A	0.0805235	0.246305	203	0.261235	0.988987	-0.885993
Pv2.1_04_507864	Pv04	507864	Pv2.1_04_507864_A/T	A	T	0.0805235	0.246305	203	0.261235	0.988987	-0.885993
Pv2.1_08_61828235	Pv08	61828235	Pv2.1_08_61828235_G/A	G	A	0.0805669	0.362069	203	0.261231	0.988987	-0.919642
Pv2.1_07_445415	Pv07	445415	Pv2.1_07_445415_T/C	T	C	0.0808696	0.295567	203	0.261207	0.988987	0.705519
Pv2.1_07_38824964	Pv07	38824964	Pv2.1_07_38824964_A/G	A	G	0.0808733	0.091133	203	0.261207	0.988987	1.40997
Pv2.1_10_5889995	Pv010	5889995	Pv2.1_10_5889995_T/C	T	C	0.080916	0.206897	203	0.261204	0.988987	0.924576
Pv2.1_10_5890000	Pv010	5890000	Pv2.1_10_5890000_G/A	G	A	0.080916	0.206897	203	0.261204	0.988987	0.924576
Pv2.1_09_28072612	Pv09	28072612	Pv2.1_09_28072612_C/T	C	T	0.0812019	0.137931	203	0.261182	0.988987	-0.900776
Pv2.1_09_14556251	Pv09	14556251	Pv2.1_09_14556251_A/G	A	G	0.0812373	0.125616	203	0.261179	0.988987	-1.06467
Pv2.1_09_14556261	Pv09	14556261	Pv2.1_09_14556261_G/A	G	A	0.0812373	0.125616	203	0.261179	0.988987	-1.06467
Pv2.1_09_14586676	Pv09	14586676	Pv2.1_09_14586676_G/A	G	A	0.0812373	0.125616	203	0.261179	0.988987	-1.06467
Pv2.1_07_38830465	Pv07	38830465	Pv2.1_07_38830465_C/A	C	A	0.0814675	0.0935961	203	0.261161	0.988987	1.39763
Pv2.1_08_49861531	Pv08	49861531	Pv2.1_08_49861531_A/G	A	G	0.0815689	0.152709	203	0.261153	0.988987	0.878698
Pv2.1_04_7718302	Pv04	7718302	Pv2.1_04_7718302_G/A	G	A	0.0815996	0.0763547	203	0.261151	0.988987	1.16913
Pv2.1_04_7718303	Pv04	7718303	Pv2.1_04_7718303_T/G	T	G	0.0815996	0.0763547	203	0.261151	0.988987	1.16913
Pv2.1_08_62021993	Pv08	62021993	Pv2.1_08_62021993_C/T	C	T	0.0816211	0.364532	203	0.261149	0.988987	-0.910266
Pv2.1_08_62022042	Pv08	62022042	Pv2.1_08_62022042_G/C	G	C	0.0816211	0.364532	203	0.261149	0.988987	-0.910266
Pv2.1_08_62022101	Pv08	62022101	Pv2.1_08_62022101_G/T	G	T	0.0816211	0.364532	203	0.261149	0.988987	0.910266
Pv2.1_11_52612142	Pv011	52612142	Pv2.1_11_52612142_A/G	A	G	0.0816302	0.197044	203	0.261149	0.988987	-0.939203
Pv2.1_03_8746487	Pv03	8746487	Pv2.1_03_8746487_G/T	G	T	0.0816548	0.251232	203	0.261147	0.988987	1.07033
Pv2.1_10_8061010	Pv010	8061010	Pv2.1_10_8061010_C/T	C	T	0.0816856	0.0541872	203	0.261144	0.988987	-1.36249
Pv2.1_04_2356775	Pv04	2356775	Pv2.1_04_2356775_A/G	A	G	0.0818274	0.29803	203	0.261133	0.988987	-0.83931
Pv2.1_04_3964125	Pv04	3964125	Pv2.1_04_3964125_A/G	A	G	0.0818725	0.0935961	203	0.26113	0.988987	-1.25356
Pv2.1_04_3968000	Pv04	3968000	Pv2.1_04_3968000_G/A	G	A	0.0818725	0.0935961	203	0.26113	0.988987	-1.25356
Pv2.1_04_4560460	Pv04	4560460	Pv2.1_04_4560460_T/C	T	C	0.0818725	0.0935961	203	0.26113	0.988987	-1.25356
Pv2.1_02_23066321	Pv02	23066321	Pv2.1_02_23066321_A/G	A	G	0.0819335	0.310345	203	0.261125	0.988987	0.872688
Pv2.1_09_26358704	Pv09	26358704	Pv2.1_09_26358704_C/G	C	G	0.0821223	0.137931	203	0.261111	0.988987	-0.888631
Pv2.1_01_6607432	Pv01	6607432	Pv2.1_01_6607432_A/T	A	T	0.082562	0.273399	203	0.261077	0.988987	-0.795158
Pv2.1_01_6607453	Pv01	6607453	Pv2.1_01_6607453_C/T	C	T	0.082562	0.273399	203	0.261077	0.988987	-0.795158
Pv2.1_01_6607466	Pv01	6607466	Pv2.1_01_6607466_G/A	G	A	0.082562	0.273399	203	0.261077	0.988987	-0.795158
Pv2.1_07_189064	Pv07	189064	Pv2.1_07_189064_G/A	G	A	0.0826994	0.278325	203	0.261067	0.988987	-0.80068
Pv2.1_04_53825	Pv04	53825	Pv2.1_04_53825_T/A	T	A	0.0830528	0.118227	203	0.26104	0.988987	-1.05886
Pv2.1_04_55170	Pv04	55170	Pv2.1_04_55170_C/G	C	G	0.0830528	0.118227	203	0.26104	0.988987	-1.05886
Pv2.1_04_145855	Pv04	145855	Pv2.1_04_145855_C/T	C	T	0.0830528	0.118227	203	0.26104	0.988987	-1.05886
Pv2.1_04_36912	Pv04	36912	Pv2.1_04_36912_G/A	G	A	0.0830528	0.118227	203	0.26104	0.988987	1.05886
Pv2.1_08_3611622	Pv08	3611622	Pv2.1_08_3611622_G/A	G	A	0.0831113	0.135468	203	0.261035	0.988987	0.995929
Pv2.1_11_52890037	Pv011	52890037	Pv2.1_11_52890037_C/G	C	G	0.0831303	0.20197	203	0.261034	0.988987	-0.907002
Pv2.1_11_53489943	Pv011	53489943	Pv2.1_11_53489943_C/A	C	A	0.0831812	0.1133	203	0.26103	0.988987	-1.2915
Pv2.1_11_53496464	Pv011	53496464	Pv2.1_11_53496464_C/A	C	A	0.0831812	0.1133	203	0.26103	0.988987	-1.2915
Pv2.1_11_53496487	Pv011	53496487	Pv2.1_11_53496487_A/C	A	C	0.0831812	0.1133	203	0.26103	0.988987	-1.2915
Pv2.1_11_53496494	Pv011	53496494	Pv2.1_11_53496494_T/C	T	C	0.0831812	0.1133	203	0.26103	0.988987	-1.2915
Pv2.1_11_53497340	Pv011	53497340	Pv2.1_11_53497340_T/A	T	A	0.0831812	0.1133	203	0.26103	0.988987	-1.2915
Pv2.1_11_53497836	Pv011	53497836	Pv2.1_11_53497836_T/A	T	A	0.0831812	0.1133	203	0.26103	0.988987	-1.2915
Pv2.1_11_53497859	Pv011	53497859	Pv2.1_11_53497859_A/C	A	C	0.0831812	0.1133	203	0.26103	0.988987	-1.2915
Pv2.1_11_53498318	Pv011	53498318	Pv2.1_11_53498318_G/T	G	T	0.0831812	0.1133	203	0.26103	0.988987	-1.2915
Pv2.1_11_53498320	Pv011	53498320	Pv2.1_11_53498320_A/T	A	T	0.0831812	0.1133	203	0.26103	0.988987	-1.2915
Pv2.1_11_53498352	Pv011	53498352	Pv2.1_11_53498352_T/C	T	C	0.0831812	0.1133	203	0.26103	0.988987	-1.2915
Pv2.1_11_53519180	Pv011	53519180	Pv2.1_11_53519180_T/A	T	A	0.0831812	0.1133	203	0.26103	0.988987	-1.2915
Pv2.1_11_53529900	Pv011	53529900	Pv2.1_11_53529900_C/A	C	A	0.0831812	0.1133	203	0.26103	0.988987	-1.2915
Pv2.1_11_53543510	Pv011	53543510	Pv2.1_11_53543510_A/G	A	G	0.0831812	0.1133	203	0.26103	0.988987	-1.2915
Pv2.1_11_53480573	Pv011	53480573	Pv2.1_11_53480573_T/C	T	C	0.0831812	0.1133	203	0.26103	0.988987	1.2915
Pv2.1_11_53497330	Pv011	53497330	Pv2.1_11_53497330_A/G	A	G	0.0831812	0.1133	203	0.26103	0.988987	1.2915
Pv2.1_11_53529911	Pv011	53529911	Pv2.1_11_53529911_G/A	G	A	0.0831812	0.1133	203	0.26103	0.988987	1.2915
Pv2.1_11_53529929	Pv011	53529929	Pv2.1_11_53529929_A/C	A	C	0.0831812	0.1133	203	0.26103	0.988987	1.2915
Pv2.1_11_53562043	Pv011	53562043	Pv2.1_11_53562043_A/C	A	C	0.0831812	0.1133	203	0.26103	0.988987	1.2915
Pv2.1_11_53562082	Pv011	53562082	Pv2.1_11_53562082_C/T	C	T	0.0831812	0.1133	203	0.26103	0.988987	1.2915
Pv2.1_03_2490120	Pv03	2490120	Pv2.1_03_2490120_T/C	T	C	0.0835308	0.118227	203	0.261004	0.988987	-1.10628
Pv2.1_03_2494112	Pv03	2494112	Pv2.1_03_2494112_A/G	A	G	0.0835308	0.118227	203	0.261004	0.988987	-1.10628
Pv2.1_03_2494141	Pv03	2494141	Pv2.1_03_2494141_G/A	G	A	0.0835308	0.118227	203	0.261004	0.988987	-1.10628
Pv2.1_03_2504233	Pv03	2504233	Pv2.1_03_2504233_A/G	A	G	0.0835308	0.118227	203	0.261004	0.988987	-1.10628
Pv2.1_03_2504314	Pv03	2504314	Pv2.1_03_2504314_G/A	G	A	0.0835308	0.118227	203	0.261004	0.988987	-1.10628
Pv2.1_04_45663366	Pv04	45663366	Pv2.1_04_45663366_T/C	T	C	0.0837517	0.238916	203	0.260987	0.988987	-0.995197
Pv2.1_07_40005134	Pv07	40005134	Pv2.1_07_40005134_A/G	A	G	0.0841326	0.135468	203	0.260959	0.988987	0.930694
Pv2.1_01_725840	Pv01	725840	Pv2.1_01_725840_T/C	T	C	0.08425	0.26601	203	0.26095	0.988987	-0.720739
Pv2.1_04_11942903	Pv04	11942903	Pv2.1_04_11942903_T/A	T	A	0.0842778	0.0985222	203	0.260948	0.988987	-1.21483
Pv2.1_04_11942912	Pv04	11942912	Pv2.1_04_11942912_T/G	T	G	0.0842778	0.0985222	203	0.260948	0.988987	-1.21483
Pv2.1_04_12122962	Pv04	12122962	Pv2.1_04_12122962_T/G	T	G	0.0842778	0.0985222	203	0.260948	0.988987	-1.21483
Pv2.1_04_12122976	Pv04	12122976	Pv2.1_04_12122976_A/G	A	G	0.0842778	0.0985222	203	0.260948	0.988987	-1.21483
Pv2.1_08_61589684	Pv08	61589684	Pv2.1_08_61589684_G/A	G	A	0.0844286	0.226601	203	0.260937	0.988987	1.09586
Pv2.1_08_61589704	Pv08	61589704	Pv2.1_08_61589704_G/C	G	C	0.0844286	0.226601	203	0.260937	0.988987	1.09586
Pv2.1_08_3098637	Pv08	3098637	Pv2.1_08_3098637_C/T	C	T	0.0844783	0.366995	203	0.260933	0.988987	-0.786509
Pv2.1_06_20165708	Pv06	20165708	Pv2.1_06_20165708_G/C	G	C	0.0844851	0.221675	203	0.260932	0.988987	-1.51349
Pv2.1_08_58532333	Pv08	58532333	Pv2.1_08_58532333_C/T	C	T	0.0846307	0.0418719	203	0.260922	0.988987	1.8064
Pv2.1_04_425517	Pv04	425517	Pv2.1_04_425517_G/A	G	A	0.0847925	0.128079	203	0.26091	0.988987	-0.994292
Pv2.1_05_39742326	Pv05	39742326	Pv2.1_05_39742326_T/A	T	A	0.0848445	0.403941	203	0.260906	0.988987	-0.717795
Pv2.1_04_1855076	Pv04	1855076	Pv2.1_04_1855076_G/C	G	C	0.0849065	0.251232	203	0.260901	0.988987	-0.840597
Pv2.1_04_1855107	Pv04	1855107	Pv2.1_04_1855107_T/C	T	C	0.0849065	0.251232	203	0.260901	0.988987	-0.840597
Pv2.1_04_1849201	Pv04	1849201	Pv2.1_04_1849201_T/A	T	A	0.0849065	0.251232	203	0.260901	0.988987	0.840597
Pv2.1_07_34558257	Pv07	34558257	Pv2.1_07_34558257_C/T	C	T	0.0851615	0.455665	203	0.260882	0.988987	-0.981723
Pv2.1_08_61903983	Pv08	61903983	Pv2.1_08_61903983_G/C	G	C	0.0851856	0.231527	203	0.260881	0.988987	1.0589
Pv2.1_09_13933836	Pv09	13933836	Pv2.1_09_13933836_G/A	G	A	0.0853478	0.140394	203	0.260869	0.988987	-1.02417
Pv2.1_10_4917709	Pv010	4917709	Pv2.1_10_4917709_A/T	A	T	0.0853484	0.369458	203	0.260869	0.988987	0.822906
Pv2.1_11_52890212	Pv011	52890212	Pv2.1_11_52890212_T/G	T	G	0.0853787	0.197044	203	0.260866	0.988987	0.884655
Pv2.1_08_17212648	Pv08	17212648	Pv2.1_08_17212648_C/T	C	T	0.085738	0.29803	203	0.26084	0.988987	-0.777755
Pv2.1_04_9626833	Pv04	9626833	Pv2.1_04_9626833_C/A	C	A	0.0857802	0.110837	203	0.260837	0.988987	-1.19411
Pv2.1_04_9649750	Pv04	9649750	Pv2.1_04_9649750_T/C	T	C	0.0857802	0.110837	203	0.260837	0.988987	-1.19411
Pv2.1_04_9649784	Pv04	9649784	Pv2.1_04_9649784_C/T	C	T	0.0857802	0.110837	203	0.260837	0.988987	-1.19411
Pv2.1_04_9704101	Pv04	9704101	Pv2.1_04_9704101_C/T	C	T	0.0857802	0.110837	203	0.260837	0.988987	-1.19411
Pv2.1_04_9704223	Pv04	9704223	Pv2.1_04_9704223_A/T	A	T	0.0857802	0.110837	203	0.260837	0.988987	-1.19411
Pv2.1_08_61889706	Pv08	61889706	Pv2.1_08_61889706_A/G	A	G	0.0859375	0.167488	203	0.260826	0.988987	-1.13276
Pv2.1_08_61889738	Pv08	61889738	Pv2.1_08_61889738_G/C	G	C	0.0859375	0.167488	203	0.260826	0.988987	-1.13276
Pv2.1_03_1023355	Pv03	1023355	Pv2.1_03_1023355_T/C	T	C	0.0862505	0.133005	203	0.260803	0.988987	0.960694
Pv2.1_03_8805009	Pv03	8805009	Pv2.1_03_8805009_G/A	G	A	0.086342	0.243842	203	0.260796	0.988987	1.03709
Pv2.1_04_43641252	Pv04	43641252	Pv2.1_04_43641252_A/C	A	C	0.0865268	0.0665025	203	0.260783	0.988987	-1.17793
Pv2.1_04_10801613	Pv04	10801613	Pv2.1_04_10801613_G/A	G	A	0.0867234	0.108374	203	0.260769	0.988987	-1.19298
Pv2.1_04_10801742	Pv04	10801742	Pv2.1_04_10801742_G/A	G	A	0.0867234	0.108374	203	0.260769	0.988987	-1.19298
Pv2.1_04_11044472	Pv04	11044472	Pv2.1_04_11044472_C/T	C	T	0.0867234	0.108374	203	0.260769	0.988987	-1.19298
Pv2.1_04_11135614	Pv04	11135614	Pv2.1_04_11135614_G/A	G	A	0.0867234	0.108374	203	0.260769	0.988987	-1.19298
Pv2.1_04_11271937	Pv04	11271937	Pv2.1_04_11271937_T/A	T	A	0.0867234	0.108374	203	0.260769	0.988987	-1.19298
Pv2.1_04_11357640	Pv04	11357640	Pv2.1_04_11357640_C/T	C	T	0.0867234	0.108374	203	0.260769	0.988987	-1.19298
Pv2.1_04_11357646	Pv04	11357646	Pv2.1_04_11357646_C/G	C	G	0.0867234	0.108374	203	0.260769	0.988987	-1.19298
Pv2.1_04_11357649	Pv04	11357649	Pv2.1_04_11357649_T/C	T	C	0.0867234	0.108374	203	0.260769	0.988987	-1.19298
Pv2.1_04_11405248	Pv04	11405248	Pv2.1_04_11405248_T/A	T	A	0.0867234	0.108374	203	0.260769	0.988987	-1.19298
Pv2.1_04_11405390	Pv04	11405390	Pv2.1_04_11405390_G/A	G	A	0.0867234	0.108374	203	0.260769	0.988987	-1.19298
Pv2.1_11_52861144	Pv011	52861144	Pv2.1_11_52861144_G/A	G	A	0.0867305	0.115764	203	0.260768	0.988987	-1.26456
Pv2.1_04_2304040	Pv04	2304040	Pv2.1_04_2304040_A/T	A	T	0.0867729	0.263547	203	0.260765	0.988987	-0.835082
Pv2.1_02_48699500	Pv02	48699500	Pv2.1_02_48699500_T/C	T	C	0.0867732	0.371921	203	0.260765	0.988987	0.771022
Pv2.1_08_56226611	Pv08	56226611	Pv2.1_08_56226611_C/T	C	T	0.086995	0.14532	203	0.260749	0.988987	0.904897
Pv2.1_04_2707027	Pv04	2707027	Pv2.1_04_2707027_T/A	T	A	0.0870149	0.0837438	203	0.260748	0.988987	-1.17138
Pv2.1_08_62022031	Pv08	62022031	Pv2.1_08_62022031_A/T	A	T	0.0871477	0.241379	203	0.260738	0.988987	-1.0319
Pv2.1_08_62022113	Pv08	62022113	Pv2.1_08_62022113_G/A	G	A	0.0871477	0.241379	203	0.260738	0.988987	1.0319
Pv2.1_08_61881879	Pv08	61881879	Pv2.1_08_61881879_A/G	A	G	0.0871629	0.226601	203	0.260737	0.988987	-1.081
Pv2.1_01_2503427	Pv01	2503427	Pv2.1_01_2503427_G/T	G	T	0.0872003	0.305419	203	0.260734	0.988987	-0.793811
Pv2.1_01_2503460	Pv01	2503460	Pv2.1_01_2503460_G/A	G	A	0.0872003	0.305419	203	0.260734	0.988987	-0.793811
Pv2.1_11_52611050	Pv011	52611050	Pv2.1_11_52611050_T/C	T	C	0.0872089	0.199507	203	0.260734	0.988987	-0.918871
Pv2.1_03_2490178	Pv03	2490178	Pv2.1_03_2490178_C/A	C	A	0.0873708	0.115764	203	0.260722	0.988987	-1.11177
Pv2.1_03_2490186	Pv03	2490186	Pv2.1_03_2490186_G/T	G	T	0.0873708	0.115764	203	0.260722	0.988987	-1.11177
Pv2.1_04_2030452	Pv04	2030452	Pv2.1_04_2030452_G/T	G	T	0.0874176	0.35468	203	0.260719	0.988987	-0.833531
Pv2.1_08_61826003	Pv08	61826003	Pv2.1_08_61826003_G/C	G	C	0.0875391	0.236453	203	0.26071	0.988987	1.06459
Pv2.1_08_61826038	Pv08	61826038	Pv2.1_08_61826038_G/A	G	A	0.0875391	0.236453	203	0.26071	0.988987	1.06459
Pv2.1_02_48727456	Pv02	48727456	Pv2.1_02_48727456_C/T	C	T	0.0876002	0.374384	203	0.260706	0.988987	0.765961
Pv2.1_04_45673783	Pv04	45673783	Pv2.1_04_45673783_G/A	G	A	0.0876213	0.246305	203	0.260704	0.988987	-0.946815
Pv2.1_07_21106176	Pv07	21106176	Pv2.1_07_21106176_C/G	C	G	0.087688	0.256158	203	0.260699	0.988987	0.852163
Pv2.1_07_21379917	Pv07	21379917	Pv2.1_07_21379917_G/C	G	C	0.087688	0.256158	203	0.260699	0.988987	0.852163
Pv2.1_07_21439563	Pv07	21439563	Pv2.1_07_21439563_T/G	T	G	0.087688	0.256158	203	0.260699	0.988987	0.852163
Pv2.1_07_36796001	Pv07	36796001	Pv2.1_07_36796001_A/G	A	G	0.0877342	0.418719	203	0.260696	0.988987	0.777876
Pv2.1_07_36796008	Pv07	36796008	Pv2.1_07_36796008_C/G	C	G	0.0877342	0.418719	203	0.260696	0.988987	0.777876
Pv2.1_09_36508137	Pv09	36508137	Pv2.1_09_36508137_G/C	G	C	0.0880359	0.268473	203	0.260675	0.988987	0.870608
Pv2.1_09_36508142	Pv09	36508142	Pv2.1_09_36508142_G/C	G	C	0.0880359	0.268473	203	0.260675	0.988987	0.870608
Pv2.1_09_36508179	Pv09	36508179	Pv2.1_09_36508179_C/T	C	T	0.0880359	0.268473	203	0.260675	0.988987	0.870608
Pv2.1_09_14534494	Pv09	14534494	Pv2.1_09_14534494_C/T	C	T	0.0881773	0.128079	203	0.260665	0.988987	-1.02891
Pv2.1_09_14586028	Pv09	14586028	Pv2.1_09_14586028_T/C	T	C	0.0881773	0.128079	203	0.260665	0.988987	-1.02891
Pv2.1_09_14586289	Pv09	14586289	Pv2.1_09_14586289_G/A	G	A	0.0881773	0.128079	203	0.260665	0.988987	-1.02891
Pv2.1_09_14586322	Pv09	14586322	Pv2.1_09_14586322_G/A	G	A	0.0881773	0.128079	203	0.260665	0.988987	-1.02891
Pv2.1_09_14620967	Pv09	14620967	Pv2.1_09_14620967_C/A	C	A	0.0881773	0.128079	203	0.260665	0.988987	-1.02891
Pv2.1_09_14637617	Pv09	14637617	Pv2.1_09_14637617_A/G	A	G	0.0881773	0.128079	203	0.260665	0.988987	-1.02891
Pv2.1_09_14645261	Pv09	14645261	Pv2.1_09_14645261_C/T	C	T	0.0881773	0.128079	203	0.260665	0.988987	-1.02891
Pv2.1_09_14645273	Pv09	14645273	Pv2.1_09_14645273_T/C	T	C	0.0881773	0.128079	203	0.260665	0.988987	-1.02891
Pv2.1_09_14538837	Pv09	14538837	Pv2.1_09_14538837_T/C	T	C	0.0881773	0.128079	203	0.260665	0.988987	1.02891
Pv2.1_10_43957399	Pv010	43957399	Pv2.1_10_43957399_T/C	T	C	0.0881964	0.302956	203	0.260663	0.988987	0.725507
Pv2.1_08_61844294	Pv08	61844294	Pv2.1_08_61844294_A/T	A	T	0.0882055	0.169951	203	0.260663	0.988987	-1.09125
Pv2.1_06_27714989	Pv06	27714989	Pv2.1_06_27714989_G/A	G	A	0.0883104	0.46798	203	0.260655	0.988987	-0.834942
Pv2.1_06_27715168	Pv06	27715168	Pv2.1_06_27715168_A/G	A	G	0.0883104	0.46798	203	0.260655	0.988987	-0.834942
Pv2.1_06_27749167	Pv06	27749167	Pv2.1_06_27749167_C/T	C	T	0.0883104	0.46798	203	0.260655	0.988987	-0.834942
Pv2.1_04_45663352	Pv04	45663352	Pv2.1_04_45663352_C/T	C	T	0.0884239	0.241379	203	0.260647	0.988987	-0.972761
Pv2.1_08_62827033	Pv08	62827033	Pv2.1_08_62827033_A/G	A	G	0.0887997	0.0935961	203	0.260621	0.988987	1.48787
Pv2.1_10_44169457	Pv010	44169457	Pv2.1_10_44169457_G/A	G	A	0.0888288	0.128079	203	0.260619	0.988987	1.02837
Pv2.1_09_10462700	Pv09	10462700	Pv2.1_09_10462700_C/T	C	T	0.0889686	0.103448	203	0.260609	0.988987	0.963138
Pv2.1_09_10496926	Pv09	10496926	Pv2.1_09_10496926_G/A	G	A	0.0889686	0.103448	203	0.260609	0.988987	0.963138
Pv2.1_01_451992	Pv01	451992	Pv2.1_01_451992_A/G	A	G	0.089287	0.35468	203	0.260586	0.988987	0.660563
Pv2.1_01_452055	Pv01	452055	Pv2.1_01_452055_A/T	A	T	0.089287	0.35468	203	0.260586	0.988987	0.660563
Pv2.1_08_62732955	Pv08	62732955	Pv2.1_08_62732955_C/A	C	A	0.0894764	0.423645	203	0.260573	0.988987	-0.779591
Pv2.1_01_43071539	Pv01	43071539	Pv2.1_01_43071539_A/G	A	G	0.089556	0.458128	203	0.260568	0.988987	0.715452
Pv2.1_08_62239378	Pv08	62239378	Pv2.1_08_62239378_T/C	T	C	0.0896801	0.32266	203	0.260559	0.988987	-0.905382
Pv2.1_08_2907111	Pv08	2907111	Pv2.1_08_2907111_T/C	T	C	0.0896991	0.364532	203	0.260558	0.988987	-0.793881
Pv2.1_07_34547095	Pv07	34547095	Pv2.1_07_34547095_C/A	C	A	0.0897251	0.458128	203	0.260556	0.988987	-0.944631
Pv2.1_07_34558570	Pv07	34558570	Pv2.1_07_34558570_G/A	G	A	0.0897251	0.458128	203	0.260556	0.988987	-0.944631
Pv2.1_08_61266705	Pv08	61266705	Pv2.1_08_61266705_A/T	A	T	0.0898311	0.307882	203	0.260548	0.988987	1.01453
Pv2.1_11_3755032	Pv011	3755032	Pv2.1_11_3755032_A/G	A	G	0.0898754	0.334975	203	0.260545	0.988987	0.840807
Pv2.1_07_286091	Pv07	286091	Pv2.1_07_286091_G/C	G	C	0.0904809	0.243842	203	0.260504	0.988987	-0.779638
Pv2.1_09_25494297	Pv09	25494297	Pv2.1_09_25494297_A/T	A	T	0.0904893	0.135468	203	0.260503	0.988987	-0.902673
Pv2.1_04_7272416	Pv04	7272416	Pv2.1_04_7272416_A/T	A	T	0.090789	0.115764	203	0.260482	0.988987	-1.15935
Pv2.1_04_7272479	Pv04	7272479	Pv2.1_04_7272479_C/T	C	T	0.090789	0.115764	203	0.260482	0.988987	-1.15935
Pv2.1_04_44784868	Pv04	44784868	Pv2.1_04_44784868_C/T	C	T	0.0907899	0.103448	203	0.260482	0.988987	1.23152
Pv2.1_01_144112	Pv01	144112	Pv2.1_01_144112_G/A	G	A	0.0908444	0.458128	203	0.260479	0.988987	0.619672
Pv2.1_03_33548159	Pv03	33548159	Pv2.1_03_33548159_G/A	G	A	0.0911743	0.251232	203	0.260456	0.988987	0.774106
Pv2.1_08_61828279	Pv08	61828279	Pv2.1_08_61828279_T/C	T	C	0.0912768	0.364532	203	0.260449	0.988987	-0.890663
Pv2.1_08_61828294	Pv08	61828294	Pv2.1_08_61828294_T/C	T	C	0.0912768	0.364532	203	0.260449	0.988987	-0.890663
Pv2.1_08_62573337	Pv08	62573337	Pv2.1_08_62573337_T/G	T	G	0.0915755	0.219212	203	0.260429	0.988987	-0.931468
Pv2.1_08_16103387	Pv08	16103387	Pv2.1_08_16103387_T/A	T	A	0.0915821	0.315271	203	0.260428	0.988987	-0.731663
Pv2.1_07_956003	Pv07	956003	Pv2.1_07_956003_C/G	C	G	0.0917009	0.142857	203	0.26042	0.988987	0.910321
Pv2.1_07_956040	Pv07	956040	Pv2.1_07_956040_G/A	G	A	0.0917009	0.142857	203	0.26042	0.988987	0.910321
Pv2.1_07_956042	Pv07	956042	Pv2.1_07_956042_G/A	G	A	0.0917009	0.142857	203	0.26042	0.988987	0.910321
Pv2.1_07_444014	Pv07	444014	Pv2.1_07_444014_C/T	C	T	0.0918887	0.29064	203	0.260407	0.988987	0.698786
Pv2.1_04_8787434	Pv04	8787434	Pv2.1_04_8787434_A/T	A	T	0.0920349	0.1133	203	0.260397	0.988987	-1.14208
Pv2.1_07_40010965	Pv07	40010965	Pv2.1_07_40010965_A/T	A	T	0.0922024	0.135468	203	0.260386	0.988987	0.905944
Pv2.1_01_1202888	Pv01	1202888	Pv2.1_01_1202888_C/T	C	T	0.0925519	0.192118	203	0.260363	0.988987	-0.895347
Pv2.1_01_1204142	Pv01	1204142	Pv2.1_01_1204142_T/C	T	C	0.0925519	0.192118	203	0.260363	0.988987	-0.895347
Pv2.1_01_1193335	Pv01	1193335	Pv2.1_01_1193335_A/T	A	T	0.0925519	0.192118	203	0.260363	0.988987	0.895347
Pv2.1_01_1204184	Pv01	1204184	Pv2.1_01_1204184_T/A	T	A	0.0925519	0.192118	203	0.260363	0.988987	0.895347
Pv2.1_01_1204205	Pv01	1204205	Pv2.1_01_1204205_T/G	T	G	0.0925519	0.192118	203	0.260363	0.988987	0.895347
Pv2.1_01_1208761	Pv01	1208761	Pv2.1_01_1208761_T/C	T	C	0.0925519	0.192118	203	0.260363	0.988987	0.895347
Pv2.1_01_1209136	Pv01	1209136	Pv2.1_01_1209136_T/A	T	A	0.0925519	0.192118	203	0.260363	0.988987	0.895347
Pv2.1_10_4624743	Pv010	4624743	Pv2.1_10_4624743_T/A	T	A	0.0927866	0.315271	203	0.260347	0.988987	-0.985165
Pv2.1_06_27759264	Pv06	27759264	Pv2.1_06_27759264_T/C	T	C	0.0931075	0.465517	203	0.260325	0.988987	-0.825225
Pv2.1_06_18765757	Pv06	18765757	Pv2.1_06_18765757_A/G	A	G	0.0934502	0.137931	203	0.260302	0.988987	1.46395
Pv2.1_06_18802080	Pv06	18802080	Pv2.1_06_18802080_A/C	A	C	0.0934502	0.137931	203	0.260302	0.988987	1.46395
Pv2.1_06_18802089	Pv06	18802089	Pv2.1_06_18802089_G/A	G	A	0.0934502	0.137931	203	0.260302	0.988987	1.46395
Pv2.1_06_18830166	Pv06	18830166	Pv2.1_06_18830166_T/C	T	C	0.0934502	0.137931	203	0.260302	0.988987	1.46395
Pv2.1_06_18741514	Pv06	18741514	Pv2.1_06_18741514_A/G	A	G	0.0934502	0.137931	203	0.260302	0.988987	-1.46395
Pv2.1_06_18802293	Pv06	18802293	Pv2.1_06_18802293_C/T	C	T	0.0934502	0.137931	203	0.260302	0.988987	-1.46395
Pv2.1_08_60284039	Pv08	60284039	Pv2.1_08_60284039_A/T	A	T	0.0934759	0.349754	203	0.260301	0.988987	0.750256
Pv2.1_04_43652538	Pv04	43652538	Pv2.1_04_43652538_T/A	T	A	0.093508	0.0517241	203	0.260299	0.988987	-1.3293
Pv2.1_02_23066358	Pv02	23066358	Pv2.1_02_23066358_A/C	A	C	0.0936227	0.305419	203	0.260291	0.988987	0.872317
Pv2.1_04_156688	Pv04	156688	Pv2.1_04_156688_A/T	A	T	0.0936257	0.128079	203	0.260291	0.988987	-0.989576
Pv2.1_04_156700	Pv04	156700	Pv2.1_04_156700_A/G	A	G	0.0936257	0.128079	203	0.260291	0.988987	-0.989576
Pv2.1_03_2494267	Pv03	2494267	Pv2.1_03_2494267_A/G	A	G	0.0936927	0.1133	203	0.260286	0.988987	-1.09915
Pv2.1_02_584655	Pv02	584655	Pv2.1_02_584655_T/A	T	A	0.093785	0.184729	203	0.26028	0.988987	-0.835683
Pv2.1_02_23133463	Pv02	23133463	Pv2.1_02_23133463_A/T	A	T	0.0937979	0.310345	203	0.260279	0.988987	-0.835178
Pv2.1_02_23339827	Pv02	23339827	Pv2.1_02_23339827_C/A	C	A	0.0937979	0.310345	203	0.260279	0.988987	0.835178
Pv2.1_07_21437380	Pv07	21437380	Pv2.1_07_21437380_C/A	C	A	0.093808	0.258621	203	0.260279	0.988987	0.838161
Pv2.1_01_37766581	Pv01	37766581	Pv2.1_01_37766581_A/G	A	G	0.0938403	0.0837438	203	0.260277	0.988987	1.08998
Pv2.1_07_39816199	Pv07	39816199	Pv2.1_07_39816199_A/G	A	G	0.0940777	0.133005	203	0.260261	0.988987	0.919279
Pv2.1_07_39830015	Pv07	39830015	Pv2.1_07_39830015_G/A	G	A	0.0940777	0.133005	203	0.260261	0.988987	-0.919279
Pv2.1_02_2389798	Pv02	2389798	Pv2.1_02_2389798_C/T	C	T	0.0941034	0.413793	203	0.260259	0.988987	-0.709346
Pv2.1_02_2389818	Pv02	2389818	Pv2.1_02_2389818_G/C	G	C	0.0941034	0.413793	203	0.260259	0.988987	-0.709346
Pv2.1_07_21118916	Pv07	21118916	Pv2.1_07_21118916_A/G	A	G	0.0942526	0.258621	203	0.260249	0.988987	0.855797
Pv2.1_08_61256201	Pv08	61256201	Pv2.1_08_61256201_G/A	G	A	0.0942657	0.37931	203	0.260248	0.988987	-0.849544
Pv2.1_04_1359289	Pv04	1359289	Pv2.1_04_1359289_C/A	C	A	0.0944765	0.357143	203	0.260235	0.988987	-0.810143
Pv2.1_04_2032767	Pv04	2032767	Pv2.1_04_2032767_A/G	A	G	0.0944765	0.357143	203	0.260235	0.988987	-0.810143
Pv2.1_04_2032776	Pv04	2032776	Pv2.1_04_2032776_G/A	G	A	0.0944765	0.357143	203	0.260235	0.988987	-0.810143
Pv2.1_04_7272375	Pv04	7272375	Pv2.1_04_7272375_G/A	G	A	0.0945362	0.118227	203	0.260231	0.988987	-1.14281
Pv2.1_04_7272406	Pv04	7272406	Pv2.1_04_7272406_A/T	A	T	0.0945362	0.118227	203	0.260231	0.988987	-1.14281
Pv2.1_08_60975831	Pv08	60975831	Pv2.1_08_60975831_A/G	A	G	0.0947797	0.140394	203	0.260215	0.988987	-1.0984
Pv2.1_10_43801083	Pv010	43801083	Pv2.1_10_43801083_G/C	G	C	0.0949468	0.1133	203	0.260204	0.988987	1.07073
Pv2.1_10_43801088	Pv010	43801088	Pv2.1_10_43801088_C/G	C	G	0.0949468	0.1133	203	0.260204	0.988987	1.07073
Pv2.1_01_2503661	Pv01	2503661	Pv2.1_01_2503661_A/C	A	C	0.0955881	0.310345	203	0.260162	0.988987	-0.773626
Pv2.1_06_26045152	Pv06	26045152	Pv2.1_06_26045152_A/T	A	T	0.0956215	0.172414	203	0.26016	0.988987	0.999659
Pv2.1_08_3086119	Pv08	3086119	Pv2.1_08_3086119_G/A	G	A	0.0956508	0.371921	203	0.260158	0.988987	-0.773861
Pv2.1_08_62311090	Pv08	62311090	Pv2.1_08_62311090_C/A	C	A	0.0957257	0.091133	203	0.260153	0.988987	1.58714
Pv2.1_08_54347236	Pv08	54347236	Pv2.1_08_54347236_G/A	G	A	0.0957342	0.044335	203	0.260152	0.988987	1.51216
Pv2.1_01_6558695	Pv01	6558695	Pv2.1_01_6558695_C/A	C	A	0.0957663	0.0985222	203	0.26015	0.988987	1.07335
Pv2.1_01_6558743	Pv01	6558743	Pv2.1_01_6558743_T/C	T	C	0.0957663	0.0985222	203	0.26015	0.988987	1.07335
Pv2.1_01_6558755	Pv01	6558755	Pv2.1_01_6558755_A/C	A	C	0.0957663	0.0985222	203	0.26015	0.988987	-1.07335
Pv2.1_11_36105541	Pv011	36105541	Pv2.1_11_36105541_G/A	G	A	0.0958139	0.103448	203	0.260147	0.988987	-1.08805
Pv2.1_07_36702830	Pv07	36702830	Pv2.1_07_36702830_C/G	C	G	0.0958162	0.152709	203	0.260147	0.988987	-0.956311
Pv2.1_07_36707595	Pv07	36707595	Pv2.1_07_36707595_T/C	T	C	0.0958162	0.152709	203	0.260147	0.988987	0.956311
Pv2.1_08_2965107	Pv08	2965107	Pv2.1_08_2965107_G/T	G	T	0.0959832	0.364532	203	0.260136	0.988987	-0.757926
Pv2.1_08_2965141	Pv08	2965141	Pv2.1_08_2965141_T/A	T	A	0.0959832	0.364532	203	0.260136	0.988987	-0.757926
Pv2.1_08_2965403	Pv08	2965403	Pv2.1_08_2965403_C/A	C	A	0.0959832	0.364532	203	0.260136	0.988987	-0.757926
Pv2.1_08_2965427	Pv08	2965427	Pv2.1_08_2965427_G/T	G	T	0.0959832	0.364532	203	0.260136	0.988987	-0.757926
Pv2.1_08_2965431	Pv08	2965431	Pv2.1_08_2965431_T/A	T	A	0.0959832	0.364532	203	0.260136	0.988987	-0.757926
Pv2.1_08_2965439	Pv08	2965439	Pv2.1_08_2965439_A/C	A	C	0.0959832	0.364532	203	0.260136	0.988987	-0.757926
Pv2.1_08_3106373	Pv08	3106373	Pv2.1_08_3106373_C/A	C	A	0.0959832	0.364532	203	0.260136	0.988987	-0.757926
Pv2.1_06_19626047	Pv06	19626047	Pv2.1_06_19626047_T/G	T	G	0.0960689	0.214286	203	0.260131	0.988987	-1.62971
Pv2.1_02_2325251	Pv02	2325251	Pv2.1_02_2325251_C/T	C	T	0.0961009	0.413793	203	0.260129	0.988987	-0.713037
Pv2.1_10_4674180	Pv010	4674180	Pv2.1_10_4674180_G/A	G	A	0.096142	0.325123	203	0.260126	0.988987	-0.972966
Pv2.1_07_33533023	Pv07	33533023	Pv2.1_07_33533023_G/A	G	A	0.096309	0.105911	203	0.260115	0.988987	1.09627
Pv2.1_02_45119858	Pv02	45119858	Pv2.1_02_45119858_G/A	G	A	0.0967644	0.300493	203	0.260086	0.988987	-0.723424
Pv2.1_02_8612289	Pv02	8612289	Pv2.1_02_8612289_T/G	T	G	0.0967669	0.219212	203	0.260086	0.988987	-0.804898
Pv2.1_10_4468474	Pv010	4468474	Pv2.1_10_4468474_A/T	A	T	0.0967931	0.315271	203	0.260084	0.988987	-0.946173
Pv2.1_10_4468524	Pv010	4468524	Pv2.1_10_4468524_A/C	A	C	0.0967931	0.315271	203	0.260084	0.988987	-0.946173
Pv2.1_10_4468526	Pv010	4468526	Pv2.1_10_4468526_T/A	T	A	0.0967931	0.315271	203	0.260084	0.988987	-0.946173
Pv2.1_11_51908599	Pv011	51908599	Pv2.1_11_51908599_T/A	T	A	0.0971657	0.115764	203	0.260061	0.988987	-1.21909
Pv2.1_11_51908609	Pv011	51908609	Pv2.1_11_51908609_G/T	G	T	0.0971657	0.115764	203	0.260061	0.988987	-1.21909
Pv2.1_11_48008296	Pv011	48008296	Pv2.1_11_48008296_A/G	A	G	0.0976172	0.238916	203	0.260032	0.988987	-1.00429
Pv2.1_04_45177713	Pv04	45177713	Pv2.1_04_45177713_A/G	A	G	0.0976214	0.369458	203	0.260032	0.988987	-0.705396
Pv2.1_11_53418590	Pv011	53418590	Pv2.1_11_53418590_T/A	T	A	0.0976586	0.12069	203	0.260029	0.988987	-1.23577
Pv2.1_11_53418601	Pv011	53418601	Pv2.1_11_53418601_C/T	C	T	0.0976586	0.12069	203	0.260029	0.988987	-1.23577
Pv2.1_11_53418612	Pv011	53418612	Pv2.1_11_53418612_G/A	G	A	0.0976586	0.12069	203	0.260029	0.988987	-1.23577
Pv2.1_11_53418617	Pv011	53418617	Pv2.1_11_53418617_T/G	T	G	0.0976586	0.12069	203	0.260029	0.988987	-1.23577
Pv2.1_08_62428166	Pv08	62428166	Pv2.1_08_62428166_T/G	T	G	0.0976613	0.128079	203	0.260029	0.988987	1.32444
Pv2.1_08_62428184	Pv08	62428184	Pv2.1_08_62428184_G/A	G	A	0.0976613	0.128079	203	0.260029	0.988987	1.32444
Pv2.1_04_44784965	Pv04	44784965	Pv2.1_04_44784965_T/C	T	C	0.0977105	0.103448	203	0.260026	0.988987	1.17989
Pv2.1_04_44784976	Pv04	44784976	Pv2.1_04_44784976_G/A	G	A	0.0977105	0.103448	203	0.260026	0.988987	1.17989
Pv2.1_09_13689047	Pv09	13689047	Pv2.1_09_13689047_G/A	G	A	0.0981304	0.147783	203	0.259999	0.988987	-0.956765
Pv2.1_10_42039002	Pv010	42039002	Pv2.1_10_42039002_T/C	T	C	0.0981771	0.174877	203	0.259996	0.988987	0.943469
Pv2.1_10_42039007	Pv010	42039007	Pv2.1_10_42039007_G/T	G	T	0.0981771	0.174877	203	0.259996	0.988987	0.943469
Pv2.1_09_17688607	Pv09	17688607	Pv2.1_09_17688607_G/C	G	C	0.0982323	0.1133	203	0.259993	0.988987	-0.903793
Pv2.1_05_4712278	Pv05	4712278	Pv2.1_05_4712278_T/C	T	C	0.0983289	0.091133	203	0.259987	0.988987	-1.09336
Pv2.1_08_61266207	Pv08	61266207	Pv2.1_08_61266207_G/T	G	T	0.0983562	0.364532	203	0.259985	0.988987	-0.857119
Pv2.1_04_45948088	Pv04	45948088	Pv2.1_04_45948088_G/C	G	C	0.0987958	0.337438	203	0.259958	0.988987	-0.859254
Pv2.1_04_11044436	Pv04	11044436	Pv2.1_04_11044436_C/T	C	T	0.098834	0.105911	203	0.259955	0.988987	-1.14921
Pv2.1_01_43027224	Pv01	43027224	Pv2.1_01_43027224_A/T	A	T	0.0991541	0.465517	203	0.259935	0.988987	0.694998
Pv2.1_01_43027263	Pv01	43027263	Pv2.1_01_43027263_A/G	A	G	0.0991541	0.465517	203	0.259935	0.988987	0.694998
Pv2.1_03_9319577	Pv03	9319577	Pv2.1_03_9319577_A/G	A	G	0.099195	0.241379	203	0.259933	0.988987	1.03174
Pv2.1_02_23288558	Pv02	23288558	Pv2.1_02_23288558_T/A	T	A	0.0992891	0.307882	203	0.259927	0.988987	0.864752
Pv2.1_10_5915432	Pv010	5915432	Pv2.1_10_5915432_T/G	T	G	0.0993229	0.219212	203	0.259925	0.988987	0.891365
Pv2.1_06_25490439	Pv06	25490439	Pv2.1_06_25490439_G/T	G	T	0.0994023	0.0640394	203	0.25992	0.988987	-1.04793
Pv2.1_08_61639172	Pv08	61639172	Pv2.1_08_61639172_A/T	A	T	0.0994809	0.229064	203	0.259915	0.988987	1.04375
Pv2.1_07_4480126	Pv07	4480126	Pv2.1_07_4480126_A/G	A	G	0.0995077	0.455665	203	0.259913	0.988987	0.925833
Pv2.1_09_10457126	Pv09	10457126	Pv2.1_09_10457126_G/T	G	T	0.0996523	0.105911	203	0.259904	0.988987	0.93013
Pv2.1_09_10457131	Pv09	10457131	Pv2.1_09_10457131_G/T	G	T	0.0996523	0.105911	203	0.259904	0.988987	0.93013
Pv2.1_08_3086030	Pv08	3086030	Pv2.1_08_3086030_G/C	G	C	0.0998911	0.366995	203	0.259889	0.988987	-0.760768
Pv2.1_08_62827039	Pv08	62827039	Pv2.1_08_62827039_A/G	A	G	0.099933	0.463054	203	0.259887	0.988987	-0.739639
Pv2.1_11_51322320	Pv011	51322320	Pv2.1_11_51322320_C/T	C	T	0.0999532	0.1133	203	0.259886	0.988987	-1.20613
Pv2.1_11_51692618	Pv011	51692618	Pv2.1_11_51692618_C/T	C	T	0.0999532	0.1133	203	0.259886	0.988987	-1.20613
Pv2.1_11_51692624	Pv011	51692624	Pv2.1_11_51692624_C/T	C	T	0.0999532	0.1133	203	0.259886	0.988987	-1.20613
Pv2.1_08_16674311	Pv08	16674311	Pv2.1_08_16674311_G/A	G	A	0.100002	0.29803	203	0.259883	0.988987	-0.744491
Pv2.1_08_16674362	Pv08	16674362	Pv2.1_08_16674362_T/C	T	C	0.100002	0.29803	203	0.259883	0.988987	-0.744491
Pv2.1_01_2550503	Pv01	2550503	Pv2.1_01_2550503_G/T	G	T	0.100002	0.293103	203	0.259883	0.988987	-0.781638
Pv2.1_07_40011075	Pv07	40011075	Pv2.1_07_40011075_C/T	C	T	0.100127	0.133005	203	0.259875	0.988987	0.892478
Pv2.1_07_40017631	Pv07	40017631	Pv2.1_07_40017631_T/A	T	A	0.100127	0.133005	203	0.259875	0.988987	0.892478
Pv2.1_08_61870999	Pv08	61870999	Pv2.1_08_61870999_T/A	T	A	0.100423	0.221675	203	0.259857	0.988987	1.02192
Pv2.1_03_9184247	Pv03	9184247	Pv2.1_03_9184247_C/T	C	T	0.100483	0.241379	203	0.259853	0.988987	1.05184
Pv2.1_04_43637441	Pv04	43637441	Pv2.1_04_43637441_A/G	A	G	0.100577	0.0640394	203	0.259847	0.988987	-1.18103
Pv2.1_04_43637453	Pv04	43637453	Pv2.1_04_43637453_C/T	C	T	0.100577	0.0640394	203	0.259847	0.988987	-1.18103
Pv2.1_04_43637466	Pv04	43637466	Pv2.1_04_43637466_A/G	A	G	0.100577	0.0640394	203	0.259847	0.988987	-1.18103
Pv2.1_06_7027806	Pv06	7027806	Pv2.1_06_7027806_A/T	A	T	0.100624	0.280788	203	0.259844	0.988987	0.778777
Pv2.1_08_61091263	Pv08	61091263	Pv2.1_08_61091263_G/A	G	A	0.100669	0.0394089	203	0.259841	0.988987	1.91955
Pv2.1_08_61185945	Pv08	61185945	Pv2.1_08_61185945_C/T	C	T	0.100669	0.0394089	203	0.259841	0.988987	1.91955
Pv2.1_02_40106182	Pv02	40106182	Pv2.1_02_40106182_C/T	C	T	0.10067	0.0788177	203	0.259841	0.988987	-1.15871
Pv2.1_08_61185186	Pv08	61185186	Pv2.1_08_61185186_A/T	A	T	0.100713	0.305419	203	0.259839	0.988987	0.980203
Pv2.1_02_48755307	Pv02	48755307	Pv2.1_02_48755307_G/A	G	A	0.100793	0.413793	203	0.259834	0.988987	0.760824
Pv2.1_10_43957412	Pv010	43957412	Pv2.1_10_43957412_G/A	G	A	0.100801	0.29803	203	0.259833	0.988987	0.700312
Pv2.1_04_45285331	Pv04	45285331	Pv2.1_04_45285331_A/G	A	G	0.100809	0.366995	203	0.259833	0.988987	-0.664922
Pv2.1_08_15351113	Pv08	15351113	Pv2.1_08_15351113_A/T	A	T	0.10093	0.403941	203	0.259825	0.988987	-0.804621
Pv2.1_09_14765198	Pv09	14765198	Pv2.1_09_14765198_T/C	T	C	0.101124	0.123153	203	0.259814	0.988987	-0.994138
Pv2.1_04_15958164	Pv04	15958164	Pv2.1_04_15958164_C/T	C	T	0.101127	0.0837438	203	0.259813	0.988987	0.943141
Pv2.1_05_5042766	Pv05	5042766	Pv2.1_05_5042766_G/A	G	A	0.101153	0.0935961	203	0.259812	0.988987	-1.08309
Pv2.1_05_5042419	Pv05	5042419	Pv2.1_05_5042419_T/C	T	C	0.101153	0.0935961	203	0.259812	0.988987	1.08309
Pv2.1_09_10332339	Pv09	10332339	Pv2.1_09_10332339_G/A	G	A	0.101528	0.100985	203	0.259789	0.988987	0.946594
Pv2.1_10_4627942	Pv010	4627942	Pv2.1_10_4627942_G/C	G	C	0.101566	0.317734	203	0.259787	0.988987	-0.941627
Pv2.1_10_4627960	Pv010	4627960	Pv2.1_10_4627960_G/T	G	T	0.101566	0.317734	203	0.259787	0.988987	-0.941627
Pv2.1_10_4628002	Pv010	4628002	Pv2.1_10_4628002_T/G	T	G	0.101566	0.317734	203	0.259787	0.988987	-0.941627
Pv2.1_08_60472137	Pv08	60472137	Pv2.1_08_60472137_G/A	G	A	0.1017	0.332512	203	0.259779	0.988987	-0.802289
Pv2.1_01_3370918	Pv01	3370918	Pv2.1_01_3370918_C/G	C	G	0.10179	0.32266	203	0.259773	0.988987	0.739602
Pv2.1_10_4449454	Pv010	4449454	Pv2.1_10_4449454_C/T	C	T	0.101825	0.305419	203	0.259771	0.988987	-0.924822
Pv2.1_10_4461745	Pv010	4461745	Pv2.1_10_4461745_C/T	C	T	0.101825	0.305419	203	0.259771	0.988987	-0.924822
Pv2.1_06_21772316	Pv06	21772316	Pv2.1_06_21772316_T/C	T	C	0.101933	0.123153	203	0.259765	0.988987	1.65955
Pv2.1_08_62953164	Pv08	62953164	Pv2.1_08_62953164_T/C	T	C	0.102656	0.0837438	203	0.259721	0.988987	1.59317
Pv2.1_08_62588962	Pv08	62588962	Pv2.1_08_62588962_T/C	T	C	0.102665	0.08867	203	0.25972	0.988987	1.52722
Pv2.1_08_62659920	Pv08	62659920	Pv2.1_08_62659920_C/T	C	T	0.102665	0.08867	203	0.25972	0.988987	1.52722
Pv2.1_08_62659927	Pv08	62659927	Pv2.1_08_62659927_G/T	G	T	0.102665	0.08867	203	0.25972	0.988987	1.52722
Pv2.1_08_62659932	Pv08	62659932	Pv2.1_08_62659932_T/C	T	C	0.102665	0.08867	203	0.25972	0.988987	1.52722
Pv2.1_08_62778953	Pv08	62778953	Pv2.1_08_62778953_G/C	G	C	0.102665	0.08867	203	0.25972	0.988987	1.52722
Pv2.1_11_51675644	Pv011	51675644	Pv2.1_11_51675644_T/C	T	C	0.102927	0.108374	203	0.259705	0.988987	-1.18208
Pv2.1_08_62807694	Pv08	62807694	Pv2.1_08_62807694_T/A	T	A	0.103148	0.0812808	203	0.259691	0.988987	1.6129
Pv2.1_08_62807751	Pv08	62807751	Pv2.1_08_62807751_G/A	G	A	0.103214	0.46798	203	0.259688	0.988987	0.776056
Pv2.1_11_35064446	Pv011	35064446	Pv2.1_11_35064446_C/G	C	G	0.103295	0.1133	203	0.259683	0.988987	-1.00766
Pv2.1_11_35064447	Pv011	35064447	Pv2.1_11_35064447_T/C	T	C	0.103295	0.1133	203	0.259683	0.988987	-1.00766
Pv2.1_04_1317030	Pv04	1317030	Pv2.1_04_1317030_G/A	G	A	0.103561	0.344828	203	0.259667	0.988987	-0.775888
Pv2.1_01_43071632	Pv01	43071632	Pv2.1_01_43071632_G/T	G	T	0.104175	0.475369	203	0.259631	0.988987	0.668257
Pv2.1_02_44881098	Pv02	44881098	Pv2.1_02_44881098_C/T	C	T	0.104299	0.182266	203	0.259623	0.988987	0.875695
Pv2.1_07_184192	Pv07	184192	Pv2.1_07_184192_T/A	T	A	0.104366	0.278325	203	0.259619	0.988987	-0.743792
Pv2.1_02_12941392	Pv02	12941392	Pv2.1_02_12941392_C/T	C	T	0.104371	0.08867	203	0.259619	0.988987	-1.24716
Pv2.1_01_854339	Pv01	854339	Pv2.1_01_854339_C/T	C	T	0.104378	0.46798	203	0.259619	0.988987	0.694556
Pv2.1_11_52413259	Pv011	52413259	Pv2.1_11_52413259_C/A	C	A	0.104512	0.12069	203	0.259611	0.988987	-1.21076
Pv2.1_04_2047816	Pv04	2047816	Pv2.1_04_2047816_G/C	G	C	0.104823	0.35468	203	0.259592	0.988987	-0.788927
Pv2.1_09_36670710	Pv09	36670710	Pv2.1_09_36670710_T/C	T	C	0.105151	0.312808	203	0.259573	0.988987	-0.77781
Pv2.1_03_9110000	Pv03	9110000	Pv2.1_03_9110000_C/G	C	G	0.105271	0.238916	203	0.259566	0.988987	1.04142
Pv2.1_03_2624270	Pv03	2624270	Pv2.1_03_2624270_G/A	G	A	0.105331	0.394089	203	0.259563	0.988987	-0.65397
Pv2.1_04_541805	Pv04	541805	Pv2.1_04_541805_G/A	G	A	0.105805	0.251232	203	0.259535	0.988987	-0.762932
Pv2.1_02_48692527	Pv02	48692527	Pv2.1_02_48692527_C/G	C	G	0.10586	0.371921	203	0.259532	0.988987	0.733968
Pv2.1_02_48692537	Pv02	48692537	Pv2.1_02_48692537_C/T	C	T	0.10586	0.371921	203	0.259532	0.988987	0.733968
Pv2.1_10_6588716	Pv010	6588716	Pv2.1_10_6588716_G/A	G	A	0.10601	0.374384	203	0.259523	0.988987	-0.711497
Pv2.1_11_48008085	Pv011	48008085	Pv2.1_11_48008085_A/C	A	C	0.10602	0.248768	203	0.259523	0.988987	-0.916301
Pv2.1_11_48008090	Pv011	48008090	Pv2.1_11_48008090_C/T	C	T	0.10602	0.248768	203	0.259523	0.988987	-0.916301
Pv2.1_11_48008106	Pv011	48008106	Pv2.1_11_48008106_G/C	G	C	0.10602	0.248768	203	0.259523	0.988987	-0.916301
Pv2.1_03_53339164	Pv03	53339164	Pv2.1_03_53339164_G/A	G	A	0.106163	0.179803	203	0.259514	0.988987	-0.851793
Pv2.1_04_4239303	Pv04	4239303	Pv2.1_04_4239303_G/T	G	T	0.10624	0.211823	203	0.25951	0.988987	0.745564
Pv2.1_10_6648657	Pv010	6648657	Pv2.1_10_6648657_A/T	A	T	0.106246	0.226601	203	0.25951	0.988987	0.806234
Pv2.1_08_62280466	Pv08	62280466	Pv2.1_08_62280466_G/C	G	C	0.10642	0.0837438	203	0.2595	0.988987	1.58313
Pv2.1_08_62961909	Pv08	62961909	Pv2.1_08_62961909_G/C	G	C	0.10642	0.0837438	203	0.2595	0.988987	1.58313
Pv2.1_08_3706315	Pv08	3706315	Pv2.1_08_3706315_A/C	A	C	0.106554	0.37931	203	0.259492	0.988987	-0.710864
Pv2.1_11_51916386	Pv011	51916386	Pv2.1_11_51916386_C/G	C	G	0.106634	0.1133	203	0.259487	0.988987	-1.23883
Pv2.1_11_51916393	Pv011	51916393	Pv2.1_11_51916393_A/T	A	T	0.106634	0.1133	203	0.259487	0.988987	-1.23883
Pv2.1_11_52289441	Pv011	52289441	Pv2.1_11_52289441_C/T	C	T	0.106634	0.1133	203	0.259487	0.988987	-1.23883
Pv2.1_11_52379640	Pv011	52379640	Pv2.1_11_52379640_G/A	G	A	0.106634	0.1133	203	0.259487	0.988987	-1.23883
Pv2.1_11_52379720	Pv011	52379720	Pv2.1_11_52379720_G/A	G	A	0.106634	0.1133	203	0.259487	0.988987	-1.23883
Pv2.1_11_52413236	Pv011	52413236	Pv2.1_11_52413236_A/G	A	G	0.106634	0.1133	203	0.259487	0.988987	-1.23883
Pv2.1_11_52611026	Pv011	52611026	Pv2.1_11_52611026_A/G	A	G	0.106634	0.1133	203	0.259487	0.988987	-1.23883
Pv2.1_11_52750051	Pv011	52750051	Pv2.1_11_52750051_T/C	T	C	0.106634	0.1133	203	0.259487	0.988987	-1.23883
Pv2.1_11_52754398	Pv011	52754398	Pv2.1_11_52754398_G/T	G	T	0.106634	0.1133	203	0.259487	0.988987	-1.23883
Pv2.1_11_52889982	Pv011	52889982	Pv2.1_11_52889982_C/T	C	T	0.106634	0.1133	203	0.259487	0.988987	-1.23883
Pv2.1_11_52973823	Pv011	52973823	Pv2.1_11_52973823_T/A	T	A	0.106634	0.1133	203	0.259487	0.988987	-1.23883
Pv2.1_11_52974568	Pv011	52974568	Pv2.1_11_52974568_G/A	G	A	0.106634	0.1133	203	0.259487	0.988987	-1.23883
Pv2.1_11_52975503	Pv011	52975503	Pv2.1_11_52975503_T/A	T	A	0.106634	0.1133	203	0.259487	0.988987	-1.23883
Pv2.1_11_52984538	Pv011	52984538	Pv2.1_11_52984538_G/A	G	A	0.106634	0.1133	203	0.259487	0.988987	-1.23883
Pv2.1_11_53000861	Pv011	53000861	Pv2.1_11_53000861_A/G	A	G	0.106634	0.1133	203	0.259487	0.988987	-1.23883
Pv2.1_11_53107257	Pv011	53107257	Pv2.1_11_53107257_T/C	T	C	0.106634	0.1133	203	0.259487	0.988987	-1.23883
Pv2.1_11_53107260	Pv011	53107260	Pv2.1_11_53107260_C/T	C	T	0.106634	0.1133	203	0.259487	0.988987	-1.23883
Pv2.1_11_53132369	Pv011	53132369	Pv2.1_11_53132369_G/A	G	A	0.106634	0.1133	203	0.259487	0.988987	-1.23883
Pv2.1_11_53132564	Pv011	53132564	Pv2.1_11_53132564_C/T	C	T	0.106634	0.1133	203	0.259487	0.988987	-1.23883
Pv2.1_11_53132600	Pv011	53132600	Pv2.1_11_53132600_G/A	G	A	0.106634	0.1133	203	0.259487	0.988987	-1.23883
Pv2.1_11_53242939	Pv011	53242939	Pv2.1_11_53242939_G/T	G	T	0.106634	0.1133	203	0.259487	0.988987	-1.23883
Pv2.1_11_53242979	Pv011	53242979	Pv2.1_11_53242979_G/C	G	C	0.106634	0.1133	203	0.259487	0.988987	-1.23883
Pv2.1_11_53248080	Pv011	53248080	Pv2.1_11_53248080_A/G	A	G	0.106634	0.1133	203	0.259487	0.988987	-1.23883
Pv2.1_11_53295163	Pv011	53295163	Pv2.1_11_53295163_T/G	T	G	0.106634	0.1133	203	0.259487	0.988987	-1.23883
Pv2.1_11_53298322	Pv011	53298322	Pv2.1_11_53298322_G/A	G	A	0.106634	0.1133	203	0.259487	0.988987	-1.23883
Pv2.1_11_53369410	Pv011	53369410	Pv2.1_11_53369410_A/C	A	C	0.106634	0.1133	203	0.259487	0.988987	-1.23883
Pv2.1_11_53379179	Pv011	53379179	Pv2.1_11_53379179_G/A	G	A	0.106634	0.1133	203	0.259487	0.988987	-1.23883
Pv2.1_11_53379190	Pv011	53379190	Pv2.1_11_53379190_G/C	G	C	0.106634	0.1133	203	0.259487	0.988987	-1.23883
Pv2.1_11_53385158	Pv011	53385158	Pv2.1_11_53385158_C/T	C	T	0.106634	0.1133	203	0.259487	0.988987	-1.23883
Pv2.1_11_53452133	Pv011	53452133	Pv2.1_11_53452133_C/G	C	G	0.106902	0.115764	203	0.259472	0.988987	-1.20951
Pv2.1_11_53467728	Pv011	53467728	Pv2.1_11_53467728_G/A	G	A	0.106902	0.115764	203	0.259472	0.988987	-1.20951
Pv2.1_11_53480534	Pv011	53480534	Pv2.1_11_53480534_C/T	C	T	0.106902	0.115764	203	0.259472	0.988987	-1.20951
Pv2.1_11_53480558	Pv011	53480558	Pv2.1_11_53480558_T/A	T	A	0.106902	0.115764	203	0.259472	0.988987	-1.20951
Pv2.1_11_53487705	Pv011	53487705	Pv2.1_11_53487705_A/T	A	T	0.106902	0.115764	203	0.259472	0.988987	-1.20951
Pv2.1_11_53497093	Pv011	53497093	Pv2.1_11_53497093_A/C	A	C	0.106902	0.115764	203	0.259472	0.988987	-1.20951
Pv2.1_11_53497157	Pv011	53497157	Pv2.1_11_53497157_G/A	G	A	0.106902	0.115764	203	0.259472	0.988987	-1.20951
Pv2.1_11_53497167	Pv011	53497167	Pv2.1_11_53497167_T/C	T	C	0.106902	0.115764	203	0.259472	0.988987	-1.20951
Pv2.1_11_53497567	Pv011	53497567	Pv2.1_11_53497567_A/G	A	G	0.106902	0.115764	203	0.259472	0.988987	-1.20951
Pv2.1_11_53507063	Pv011	53507063	Pv2.1_11_53507063_T/C	T	C	0.106902	0.115764	203	0.259472	0.988987	-1.20951
Pv2.1_11_53519092	Pv011	53519092	Pv2.1_11_53519092_C/G	C	G	0.106902	0.115764	203	0.259472	0.988987	-1.20951
Pv2.1_11_53519236	Pv011	53519236	Pv2.1_11_53519236_C/A	C	A	0.106902	0.115764	203	0.259472	0.988987	-1.20951
Pv2.1_11_53519259	Pv011	53519259	Pv2.1_11_53519259_A/C	A	C	0.106902	0.115764	203	0.259472	0.988987	-1.20951
Pv2.1_11_53530055	Pv011	53530055	Pv2.1_11_53530055_C/T	C	T	0.106902	0.115764	203	0.259472	0.988987	-1.20951
Pv2.1_11_53562151	Pv011	53562151	Pv2.1_11_53562151_C/T	C	T	0.106902	0.115764	203	0.259472	0.988987	-1.20951
Pv2.1_09_28714589	Pv09	28714589	Pv2.1_09_28714589_C/G	C	G	0.107134	0.128079	203	0.259459	0.988987	-0.989096
Pv2.1_08_61502202	Pv08	61502202	Pv2.1_08_61502202_C/A	C	A	0.107251	0.221675	203	0.259452	0.988987	1.02194
Pv2.1_04_1743713	Pv04	1743713	Pv2.1_04_1743713_G/T	G	T	0.107342	0.17734	203	0.259447	0.988987	0.839781
Pv2.1_06_18803162	Pv06	18803162	Pv2.1_06_18803162_A/C	A	C	0.107547	0.211823	203	0.259435	0.988987	1.20653
Pv2.1_08_62753903	Pv08	62753903	Pv2.1_08_62753903_A/T	A	T	0.107769	0.435961	203	0.259422	0.988987	-0.740269
Pv2.1_10_43902383	Pv010	43902383	Pv2.1_10_43902383_T/G	T	G	0.107771	0.293103	203	0.259422	0.988987	0.705907
Pv2.1_10_43902389	Pv010	43902389	Pv2.1_10_43902389_T/A	T	A	0.107771	0.293103	203	0.259422	0.988987	0.705907
Pv2.1_10_43902393	Pv010	43902393	Pv2.1_10_43902393_G/A	G	A	0.107771	0.293103	203	0.259422	0.988987	0.705907
Pv2.1_07_39271310	Pv07	39271310	Pv2.1_07_39271310_C/T	C	T	0.107936	0.221675	203	0.259413	0.988987	0.763014
Pv2.1_07_39271433	Pv07	39271433	Pv2.1_07_39271433_T/A	T	A	0.107936	0.221675	203	0.259413	0.988987	0.763014
Pv2.1_02_44976354	Pv02	44976354	Pv2.1_02_44976354_C/T	C	T	0.108448	0.192118	203	0.259384	0.988987	0.83912
Pv2.1_06_28066127	Pv06	28066127	Pv2.1_06_28066127_C/T	C	T	0.108544	0.315271	203	0.259378	0.988987	0.876965
Pv2.1_07_21113633	Pv07	21113633	Pv2.1_07_21113633_T/C	T	C	0.109064	0.256158	203	0.259349	0.988987	0.809348
Pv2.1_04_2030577	Pv04	2030577	Pv2.1_04_2030577_G/T	G	T	0.109074	0.497537	203	0.259349	0.988987	0.742669
Pv2.1_08_61170427	Pv08	61170427	Pv2.1_08_61170427_T/C	T	C	0.109305	0.315271	203	0.259336	0.988987	0.932384
Pv2.1_08_61200351	Pv08	61200351	Pv2.1_08_61200351_G/A	G	A	0.109305	0.315271	203	0.259336	0.988987	0.932384
Pv2.1_04_45192955	Pv04	45192955	Pv2.1_04_45192955_T/G	T	G	0.109559	0.371921	203	0.259321	0.988987	-0.679013
Pv2.1_04_1359433	Pv04	1359433	Pv2.1_04_1359433_C/A	C	A	0.109951	0.236453	203	0.2593	0.988987	-0.812376
Pv2.1_04_1991965	Pv04	1991965	Pv2.1_04_1991965_G/A	G	A	0.109951	0.236453	203	0.2593	0.988987	-0.812376
Pv2.1_04_2032755	Pv04	2032755	Pv2.1_04_2032755_A/T	A	T	0.109951	0.236453	203	0.2593	0.988987	-0.812376
Pv2.1_04_1359299	Pv04	1359299	Pv2.1_04_1359299_T/C	T	C	0.109997	0.35468	203	0.259297	0.988987	-0.773966
Pv2.1_11_52196026	Pv011	52196026	Pv2.1_11_52196026_A/G	A	G	0.110078	0.108374	203	0.259293	0.988987	1.21133
Pv2.1_11_52287428	Pv011	52287428	Pv2.1_11_52287428_C/T	C	T	0.110078	0.108374	203	0.259293	0.988987	1.21133
Pv2.1_11_52352363	Pv011	52352363	Pv2.1_11_52352363_A/C	A	C	0.110078	0.108374	203	0.259293	0.988987	1.21133
Pv2.1_11_52413770	Pv011	52413770	Pv2.1_11_52413770_C/T	C	T	0.110078	0.108374	203	0.259293	0.988987	1.21133
Pv2.1_11_52905234	Pv011	52905234	Pv2.1_11_52905234_C/A	C	A	0.110078	0.108374	203	0.259293	0.988987	1.21133
Pv2.1_11_52968750	Pv011	52968750	Pv2.1_11_52968750_T/C	T	C	0.110078	0.108374	203	0.259293	0.988987	1.21133
Pv2.1_11_53068004	Pv011	53068004	Pv2.1_11_53068004_A/G	A	G	0.110078	0.108374	203	0.259293	0.988987	1.21133
Pv2.1_11_52196387	Pv011	52196387	Pv2.1_11_52196387_C/G	C	G	0.110078	0.108374	203	0.259293	0.988987	-1.21133
Pv2.1_11_52318298	Pv011	52318298	Pv2.1_11_52318298_C/G	C	G	0.110078	0.108374	203	0.259293	0.988987	-1.21133
Pv2.1_11_52352405	Pv011	52352405	Pv2.1_11_52352405_A/C	A	C	0.110078	0.108374	203	0.259293	0.988987	-1.21133
Pv2.1_11_52968707	Pv011	52968707	Pv2.1_11_52968707_G/C	G	C	0.110078	0.108374	203	0.259293	0.988987	-1.21133
Pv2.1_11_52968726	Pv011	52968726	Pv2.1_11_52968726_T/A	T	A	0.110078	0.108374	203	0.259293	0.988987	-1.21133
Pv2.1_02_40036859	Pv02	40036859	Pv2.1_02_40036859_G/A	G	A	0.110112	0.08867	203	0.259291	0.988987	1.07302
Pv2.1_02_40037166	Pv02	40037166	Pv2.1_02_40037166_G/A	G	A	0.110112	0.08867	203	0.259291	0.988987	1.07302
Pv2.1_02_40036877	Pv02	40036877	Pv2.1_02_40036877_A/G	A	G	0.110112	0.08867	203	0.259291	0.988987	-1.07302
Pv2.1_04_541085	Pv04	541085	Pv2.1_04_541085_T/C	T	C	0.11013	0.366995	203	0.25929	0.988987	-0.770945
Pv2.1_01_43071620	Pv01	43071620	Pv2.1_01_43071620_C/T	C	T	0.1102	0.458128	203	0.259286	0.988987	0.669976
Pv2.1_08_62869026	Pv08	62869026	Pv2.1_08_62869026_G/A	G	A	0.110312	0.349754	203	0.25928	0.988987	-0.710292
Pv2.1_04_448849	Pv04	448849	Pv2.1_04_448849_T/C	T	C	0.110401	0.128079	203	0.259275	0.988987	0.9544
Pv2.1_07_39361049	Pv07	39361049	Pv2.1_07_39361049_A/T	A	T	0.110486	0.20936	203	0.25927	0.988987	0.792705
Pv2.1_11_36419048	Pv011	36419048	Pv2.1_11_36419048_G/C	G	C	0.110547	0.0985222	203	0.259267	0.988987	1.05324
Pv2.1_04_41834664	Pv04	41834664	Pv2.1_04_41834664_G/A	G	A	0.110638	0.253695	203	0.259261	0.988987	-0.669006
Pv2.1_05_39687095	Pv05	39687095	Pv2.1_05_39687095_A/G	A	G	0.111048	0.167488	203	0.259239	0.988987	-0.86751
Pv2.1_01_43005687	Pv01	43005687	Pv2.1_01_43005687_A/T	A	T	0.111089	0.463054	203	0.259237	0.988987	0.669627
Pv2.1_01_43071701	Pv01	43071701	Pv2.1_01_43071701_T/A	T	A	0.111089	0.463054	203	0.259237	0.988987	0.669627
Pv2.1_01_43071734	Pv01	43071734	Pv2.1_01_43071734_G/C	G	C	0.111089	0.463054	203	0.259237	0.988987	0.669627
Pv2.1_01_43071761	Pv01	43071761	Pv2.1_01_43071761_T/C	T	C	0.111089	0.463054	203	0.259237	0.988987	0.669627
Pv2.1_03_9249000	Pv03	9249000	Pv2.1_03_9249000_A/T	A	T	0.111093	0.243842	203	0.259236	0.988987	0.978216
Pv2.1_03_9249073	Pv03	9249073	Pv2.1_03_9249073_A/C	A	C	0.111093	0.243842	203	0.259236	0.988987	0.978216
Pv2.1_11_3750125	Pv011	3750125	Pv2.1_11_3750125_A/G	A	G	0.111143	0.332512	203	0.259234	0.988987	0.793219
Pv2.1_11_3750143	Pv011	3750143	Pv2.1_11_3750143_T/C	T	C	0.111143	0.332512	203	0.259234	0.988987	0.793219
Pv2.1_04_44419473	Pv04	44419473	Pv2.1_04_44419473_G/T	G	T	0.1113	0.206897	203	0.259225	0.988987	-0.804687
Pv2.1_04_11056968	Pv04	11056968	Pv2.1_04_11056968_G/T	G	T	0.111333	0.103448	203	0.259223	0.988987	-1.14309
Pv2.1_04_156104	Pv04	156104	Pv2.1_04_156104_T/C	T	C	0.11155	0.125616	203	0.259211	0.988987	-0.947993
Pv2.1_04_156106	Pv04	156106	Pv2.1_04_156106_A/C	A	C	0.11155	0.125616	203	0.259211	0.988987	-0.947993
Pv2.1_03_1003015	Pv03	1003015	Pv2.1_03_1003015_T/C	T	C	0.111576	0.133005	203	0.25921	0.988987	0.874683
Pv2.1_07_594323	Pv07	594323	Pv2.1_07_594323_G/A	G	A	0.111604	0.118227	203	0.259208	0.988987	-1.0912
Pv2.1_07_607529	Pv07	607529	Pv2.1_07_607529_C/T	C	T	0.111604	0.118227	203	0.259208	0.988987	-1.0912
Pv2.1_07_607553	Pv07	607553	Pv2.1_07_607553_A/C	A	C	0.111604	0.118227	203	0.259208	0.988987	-1.0912
Pv2.1_08_62205271	Pv08	62205271	Pv2.1_08_62205271_C/T	C	T	0.111687	0.37931	203	0.259204	0.988987	0.80786
Pv2.1_04_541846	Pv04	541846	Pv2.1_04_541846_A/G	A	G	0.111818	0.352217	203	0.259197	0.988987	-0.754802
Pv2.1_04_541857	Pv04	541857	Pv2.1_04_541857_G/A	G	A	0.111818	0.352217	203	0.259197	0.988987	-0.754802
Pv2.1_05_36202553	Pv05	36202553	Pv2.1_05_36202553_T/A	T	A	0.112079	0.399015	203	0.259182	0.988987	0.638109
Pv2.1_11_53419878	Pv011	53419878	Pv2.1_11_53419878_T/G	T	G	0.112234	0.12069	203	0.259174	0.988987	-1.17669
Pv2.1_11_53419932	Pv011	53419932	Pv2.1_11_53419932_A/T	A	T	0.112234	0.12069	203	0.259174	0.988987	-1.17669
Pv2.1_11_53419933	Pv011	53419933	Pv2.1_11_53419933_T/A	T	A	0.112234	0.12069	203	0.259174	0.988987	-1.17669
Pv2.1_11_53419968	Pv011	53419968	Pv2.1_11_53419968_G/C	G	C	0.112234	0.12069	203	0.259174	0.988987	-1.17669
Pv2.1_11_52413269	Pv011	52413269	Pv2.1_11_52413269_T/A	T	A	0.112418	0.110837	203	0.259164	0.988987	-1.23241
Pv2.1_03_2580077	Pv03	2580077	Pv2.1_03_2580077_G/A	G	A	0.112493	0.394089	203	0.25916	0.988987	-0.638619
Pv2.1_04_1371820	Pv04	1371820	Pv2.1_04_1371820_T/A	T	A	0.112513	0.226601	203	0.259159	0.988987	-0.810519
Pv2.1_05_4918537	Pv05	4918537	Pv2.1_05_4918537_A/T	A	T	0.112668	0.0960591	203	0.25915	0.988987	-1.08433
Pv2.1_08_62899516	Pv08	62899516	Pv2.1_08_62899516_G/C	G	C	0.11288	0.0837438	203	0.259139	0.988987	1.564
Pv2.1_03_2624294	Pv03	2624294	Pv2.1_03_2624294_T/G	T	G	0.113026	0.396552	203	0.259131	0.988987	-0.638968
Pv2.1_06_28066169	Pv06	28066169	Pv2.1_06_28066169_G/A	G	A	0.113204	0.317734	203	0.259122	0.988987	-0.857639
Pv2.1_03_9408164	Pv03	9408164	Pv2.1_03_9408164_G/A	G	A	0.113514	0.238916	203	0.259105	0.988987	0.98183
Pv2.1_02_44970458	Pv02	44970458	Pv2.1_02_44970458_T/A	T	A	0.113571	0.189655	203	0.259102	0.988987	0.847742
Pv2.1_02_44970486	Pv02	44970486	Pv2.1_02_44970486_T/C	T	C	0.113571	0.189655	203	0.259102	0.988987	0.847742
Pv2.1_09_10480503	Pv09	10480503	Pv2.1_09_10480503_A/G	A	G	0.113626	0.103448	203	0.259099	0.988987	0.912326
Pv2.1_11_51322177	Pv011	51322177	Pv2.1_11_51322177_A/G	A	G	0.113643	0.118227	203	0.259098	0.988987	1.1178
Pv2.1_06_18778843	Pv06	18778843	Pv2.1_06_18778843_C/T	C	T	0.113688	0.219212	203	0.259096	0.988987	1.23167
Pv2.1_02_1750470	Pv02	1750470	Pv2.1_02_1750470_A/T	A	T	0.114094	0.342365	203	0.259074	0.988987	-0.679761
Pv2.1_03_33564054	Pv03	33564054	Pv2.1_03_33564054_A/G	A	G	0.114132	0.243842	203	0.259072	0.988987	0.722999
Pv2.1_01_823556	Pv01	823556	Pv2.1_01_823556_G/A	G	A	0.114152	0.236453	203	0.259071	0.988987	0.797755
Pv2.1_10_6597841	Pv010	6597841	Pv2.1_10_6597841_T/G	T	G	0.114209	0.236453	203	0.259068	0.988987	0.77687
Pv2.1_06_18802485	Pv06	18802485	Pv2.1_06_18802485_C/G	C	G	0.114284	0.140394	203	0.259064	0.988987	1.35218
Pv2.1_06_18802526	Pv06	18802526	Pv2.1_06_18802526_C/T	C	T	0.114284	0.140394	203	0.259064	0.988987	1.35218
Pv2.1_06_18822018	Pv06	18822018	Pv2.1_06_18822018_A/G	A	G	0.114284	0.140394	203	0.259064	0.988987	1.35218
Pv2.1_06_18830053	Pv06	18830053	Pv2.1_06_18830053_A/T	A	T	0.114284	0.140394	203	0.259064	0.988987	1.35218
Pv2.1_01_825912	Pv01	825912	Pv2.1_01_825912_C/G	C	G	0.114303	0.46798	203	0.259063	0.988987	0.663148
Pv2.1_08_62313824	Pv08	62313824	Pv2.1_08_62313824_G/A	G	A	0.114311	0.0788177	203	0.259062	0.988987	1.58672
Pv2.1_08_60095377	Pv08	60095377	Pv2.1_08_60095377_C/A	C	A	0.114383	0.167488	203	0.259058	0.988987	-0.917259
Pv2.1_07_21127349	Pv07	21127349	Pv2.1_07_21127349_T/C	T	C	0.114653	0.256158	203	0.259044	0.988987	0.795754
Pv2.1_02_2325366	Pv02	2325366	Pv2.1_02_2325366_A/C	A	C	0.115114	0.421182	203	0.25902	0.988987	-0.678002
Pv2.1_02_2325374	Pv02	2325374	Pv2.1_02_2325374_C/T	C	T	0.115114	0.421182	203	0.25902	0.988987	-0.678002
Pv2.1_02_44921970	Pv02	44921970	Pv2.1_02_44921970_G/C	G	C	0.115194	0.187192	203	0.259015	0.988987	-0.841638
Pv2.1_02_1335171	Pv02	1335171	Pv2.1_02_1335171_C/A	C	A	0.115329	0.408867	203	0.259008	0.988987	0.623206
Pv2.1_08_62577073	Pv08	62577073	Pv2.1_08_62577073_C/A	C	A	0.115476	0.152709	203	0.259001	0.988987	-0.973381
Pv2.1_08_62577100	Pv08	62577100	Pv2.1_08_62577100_A/G	A	G	0.115476	0.152709	203	0.259001	0.988987	-0.973381
Pv2.1_07_520254	Pv07	520254	Pv2.1_07_520254_A/C	A	C	0.115583	0.384236	203	0.258995	0.988987	0.660329
Pv2.1_07_515852	Pv07	515852	Pv2.1_07_515852_A/C	A	C	0.115583	0.384236	203	0.258995	0.988987	-0.660329
Pv2.1_04_1371707	Pv04	1371707	Pv2.1_04_1371707_A/T	A	T	0.115739	0.344828	203	0.258987	0.988987	0.739994
Pv2.1_08_61872744	Pv08	61872744	Pv2.1_08_61872744_T/C	T	C	0.115835	0.221675	203	0.258982	0.988987	0.900049
Pv2.1_08_61872878	Pv08	61872878	Pv2.1_08_61872878_G/A	G	A	0.115835	0.221675	203	0.258982	0.988987	-0.900049
Pv2.1_02_4339386	Pv02	4339386	Pv2.1_02_4339386_A/T	A	T	0.115841	0.0714286	203	0.258981	0.988987	1.11153
Pv2.1_04_44784865	Pv04	44784865	Pv2.1_04_44784865_A/T	A	T	0.115871	0.100985	203	0.25898	0.988987	1.15124
Pv2.1_09_28533035	Pv09	28533035	Pv2.1_09_28533035_G/A	G	A	0.115909	0.12069	203	0.258978	0.988987	0.97631
Pv2.1_09_28596762	Pv09	28596762	Pv2.1_09_28596762_A/G	A	G	0.115909	0.12069	203	0.258978	0.988987	0.97631
Pv2.1_10_4624868	Pv010	4624868	Pv2.1_10_4624868_T/G	T	G	0.11591	0.315271	203	0.258978	0.988987	-0.923793
Pv2.1_10_43645598	Pv010	43645598	Pv2.1_10_43645598_A/G	A	G	0.115934	0.118227	203	0.258976	0.988987	-0.973906
Pv2.1_10_43645633	Pv010	43645633	Pv2.1_10_43645633_T/C	T	C	0.115934	0.118227	203	0.258976	0.988987	-0.973906
Pv2.1_10_43647153	Pv010	43647153	Pv2.1_10_43647153_A/G	A	G	0.115934	0.118227	203	0.258976	0.988987	-0.973906
Pv2.1_10_43647185	Pv010	43647185	Pv2.1_10_43647185_G/T	G	T	0.115934	0.118227	203	0.258976	0.988987	-0.973906
Pv2.1_10_43646745	Pv010	43646745	Pv2.1_10_43646745_T/C	T	C	0.115934	0.118227	203	0.258976	0.988987	0.973906
Pv2.1_10_43646753	Pv010	43646753	Pv2.1_10_43646753_T/C	T	C	0.115934	0.118227	203	0.258976	0.988987	0.973906
Pv2.1_10_43647198	Pv010	43647198	Pv2.1_10_43647198_T/A	T	A	0.115934	0.118227	203	0.258976	0.988987	0.973906
Pv2.1_10_43648290	Pv010	43648290	Pv2.1_10_43648290_T/G	T	G	0.115934	0.118227	203	0.258976	0.988987	0.973906
Pv2.1_02_12698288	Pv02	12698288	Pv2.1_02_12698288_G/A	G	A	0.116028	0.0862069	203	0.258972	0.988987	-1.25899
Pv2.1_07_39356252	Pv07	39356252	Pv2.1_07_39356252_T/C	T	C	0.116098	0.221675	203	0.258968	0.988987	0.782934
Pv2.1_07_36718734	Pv07	36718734	Pv2.1_07_36718734_A/G	A	G	0.116128	0.147783	203	0.258966	0.988987	-0.926337
Pv2.1_03_9319368	Pv03	9319368	Pv2.1_03_9319368_C/T	C	T	0.116202	0.241379	203	0.258962	0.988987	0.999311
Pv2.1_03_9319379	Pv03	9319379	Pv2.1_03_9319379_A/T	A	T	0.116202	0.241379	203	0.258962	0.988987	0.999311
Pv2.1_07_39361182	Pv07	39361182	Pv2.1_07_39361182_G/A	G	A	0.116249	0.219212	203	0.25896	0.988987	0.784905
Pv2.1_07_39361190	Pv07	39361190	Pv2.1_07_39361190_C/G	C	G	0.116249	0.219212	203	0.25896	0.988987	0.784905
Pv2.1_08_19410156	Pv08	19410156	Pv2.1_08_19410156_A/G	A	G	0.116271	0.29803	203	0.258959	0.988987	-0.686494
Pv2.1_04_45177610	Pv04	45177610	Pv2.1_04_45177610_C/T	C	T	0.11637	0.376847	203	0.258954	0.988987	-0.670959
Pv2.1_03_53339061	Pv03	53339061	Pv2.1_03_53339061_C/T	C	T	0.116586	0.17734	203	0.258942	0.988987	-0.827645
Pv2.1_03_53399286	Pv03	53399286	Pv2.1_03_53399286_G/A	G	A	0.116586	0.17734	203	0.258942	0.988987	-0.827645
Pv2.1_03_53400827	Pv03	53400827	Pv2.1_03_53400827_C/T	C	T	0.116586	0.17734	203	0.258942	0.988987	-0.827645
Pv2.1_02_10511763	Pv02	10511763	Pv2.1_02_10511763_A/G	A	G	0.116602	0.219212	203	0.258942	0.988987	-0.75626
Pv2.1_02_10519991	Pv02	10519991	Pv2.1_02_10519991_C/T	C	T	0.116602	0.219212	203	0.258942	0.988987	-0.75626
Pv2.1_02_10520084	Pv02	10520084	Pv2.1_02_10520084_C/G	C	G	0.116602	0.219212	203	0.258942	0.988987	-0.75626
Pv2.1_07_594227	Pv07	594227	Pv2.1_07_594227_A/C	A	C	0.11671	0.115764	203	0.258936	0.988987	-1.09818
Pv2.1_07_616775	Pv07	616775	Pv2.1_07_616775_A/T	A	T	0.11671	0.115764	203	0.258936	0.988987	-1.09818
Pv2.1_07_616793	Pv07	616793	Pv2.1_07_616793_C/T	C	T	0.11671	0.115764	203	0.258936	0.988987	-1.09818
Pv2.1_07_616817	Pv07	616817	Pv2.1_07_616817_C/T	C	T	0.11671	0.115764	203	0.258936	0.988987	-1.09818
Pv2.1_10_43902359	Pv010	43902359	Pv2.1_10_43902359_C/G	C	G	0.116864	0.29064	203	0.258928	0.988987	0.686388
Pv2.1_10_43903211	Pv010	43903211	Pv2.1_10_43903211_T/C	T	C	0.116864	0.29064	203	0.258928	0.988987	0.686388
Pv2.1_04_448957	Pv04	448957	Pv2.1_04_448957_G/A	G	A	0.117029	0.492611	203	0.258919	0.988987	0.698882
Pv2.1_09_35520413	Pv09	35520413	Pv2.1_09_35520413_G/A	G	A	0.117034	0.226601	203	0.258919	0.988987	0.720697
Pv2.1_08_60472043	Pv08	60472043	Pv2.1_08_60472043_G/T	G	T	0.117201	0.339901	203	0.25891	0.988987	-0.782176
Pv2.1_10_4651745	Pv010	4651745	Pv2.1_10_4651745_G/T	G	T	0.117219	0.221675	203	0.258909	0.988987	0.873438
Pv2.1_03_8884206	Pv03	8884206	Pv2.1_03_8884206_C/T	C	T	0.117323	0.241379	203	0.258904	0.988987	-0.961931
Pv2.1_03_9246823	Pv03	9246823	Pv2.1_03_9246823_G/A	G	A	0.117323	0.241379	203	0.258904	0.988987	-0.961931
Pv2.1_03_10064265	Pv03	10064265	Pv2.1_03_10064265_G/T	G	T	0.117323	0.241379	203	0.258904	0.988987	-0.961931
Pv2.1_03_8859571	Pv03	8859571	Pv2.1_03_8859571_G/A	G	A	0.117323	0.241379	203	0.258904	0.988987	0.961931
Pv2.1_03_8860832	Pv03	8860832	Pv2.1_03_8860832_G/A	G	A	0.117323	0.241379	203	0.258904	0.988987	0.961931
Pv2.1_03_8884217	Pv03	8884217	Pv2.1_03_8884217_C/A	C	A	0.117323	0.241379	203	0.258904	0.988987	0.961931
Pv2.1_03_9232039	Pv03	9232039	Pv2.1_03_9232039_C/A	C	A	0.117323	0.241379	203	0.258904	0.988987	0.961931
Pv2.1_03_9319109	Pv03	9319109	Pv2.1_03_9319109_T/A	T	A	0.117323	0.241379	203	0.258904	0.988987	0.961931
Pv2.1_03_9319129	Pv03	9319129	Pv2.1_03_9319129_T/C	T	C	0.117323	0.241379	203	0.258904	0.988987	0.961931
Pv2.1_03_9319138	Pv03	9319138	Pv2.1_03_9319138_A/G	A	G	0.117323	0.241379	203	0.258904	0.988987	0.961931
Pv2.1_03_9376641	Pv03	9376641	Pv2.1_03_9376641_A/G	A	G	0.117323	0.241379	203	0.258904	0.988987	0.961931
Pv2.1_03_9633554	Pv03	9633554	Pv2.1_03_9633554_A/G	A	G	0.117323	0.241379	203	0.258904	0.988987	0.961931
Pv2.1_03_10065690	Pv03	10065690	Pv2.1_03_10065690_G/A	G	A	0.117323	0.241379	203	0.258904	0.988987	0.961931
Pv2.1_03_10065712	Pv03	10065712	Pv2.1_03_10065712_C/A	C	A	0.117323	0.241379	203	0.258904	0.988987	0.961931
Pv2.1_03_10066016	Pv03	10066016	Pv2.1_03_10066016_T/C	T	C	0.117323	0.241379	203	0.258904	0.988987	0.961931
Pv2.1_07_260832	Pv07	260832	Pv2.1_07_260832_G/T	G	T	0.117545	0.140394	203	0.258893	0.988987	-0.844338
Pv2.1_08_15383121	Pv08	15383121	Pv2.1_08_15383121_A/C	A	C	0.117613	0.401478	203	0.258889	0.988987	-0.771358
Pv2.1_04_450776	Pv04	450776	Pv2.1_04_450776_G/A	G	A	0.117632	0.14532	203	0.258888	0.988987	0.865325
Pv2.1_05_4964092	Pv05	4964092	Pv2.1_05_4964092_A/T	A	T	0.117684	0.0985222	203	0.258885	0.988987	-1.04828
Pv2.1_04_541480	Pv04	541480	Pv2.1_04_541480_A/G	A	G	0.117786	0.238916	203	0.25888	0.988987	-0.809842
Pv2.1_08_62767104	Pv08	62767104	Pv2.1_08_62767104_C/T	C	T	0.117818	0.0812808	203	0.258879	0.988987	1.55687
Pv2.1_08_62939553	Pv08	62939553	Pv2.1_08_62939553_G/A	G	A	0.117818	0.0812808	203	0.258879	0.988987	1.55687
Pv2.1_08_62939556	Pv08	62939556	Pv2.1_08_62939556_A/G	A	G	0.117818	0.0812808	203	0.258879	0.988987	1.55687
Pv2.1_08_62939561	Pv08	62939561	Pv2.1_08_62939561_G/C	G	C	0.117818	0.0812808	203	0.258879	0.988987	1.55687
Pv2.1_08_62957009	Pv08	62957009	Pv2.1_08_62957009_T/G	T	G	0.117818	0.0812808	203	0.258879	0.988987	1.55687
Pv2.1_01_42972011	Pv01	42972011	Pv2.1_01_42972011_G/A	G	A	0.117837	0.465517	203	0.258878	0.988987	0.655685
Pv2.1_02_39970077	Pv02	39970077	Pv2.1_02_39970077_C/G	C	G	0.117872	0.0837438	203	0.258876	0.988987	-1.12945
Pv2.1_02_39973437	Pv02	39973437	Pv2.1_02_39973437_A/T	A	T	0.117872	0.0837438	203	0.258876	0.988987	-1.12945
Pv2.1_10_41872268	Pv010	41872268	Pv2.1_10_41872268_C/G	C	G	0.118171	0.26601	203	0.25886	0.988987	0.72703
Pv2.1_07_35754971	Pv07	35754971	Pv2.1_07_35754971_G/A	G	A	0.118237	0.46798	203	0.258857	0.988987	-0.946534
Pv2.1_08_61186578	Pv08	61186578	Pv2.1_08_61186578_A/T	A	T	0.118375	0.046798	203	0.25885	0.988987	1.82327
Pv2.1_04_2032983	Pv04	2032983	Pv2.1_04_2032983_T/C	T	C	0.118569	0.37931	203	0.25884	0.988987	-0.74317
Pv2.1_09_10496962	Pv09	10496962	Pv2.1_09_10496962_T/C	T	C	0.118745	0.108374	203	0.258831	0.988987	0.907432
Pv2.1_06_27696013	Pv06	27696013	Pv2.1_06_27696013_A/G	A	G	0.118821	0.458128	203	0.258827	0.988987	-0.743067
Pv2.1_08_60471968	Pv08	60471968	Pv2.1_08_60471968_T/C	T	C	0.119084	0.344828	203	0.258814	0.988987	0.735598
Pv2.1_10_38355524	Pv010	38355524	Pv2.1_10_38355524_A/C	A	C	0.119084	0.044335	203	0.258814	0.988987	-1.38555
Pv2.1_10_38355527	Pv010	38355527	Pv2.1_10_38355527_C/G	C	G	0.119084	0.044335	203	0.258814	0.988987	-1.38555
Pv2.1_10_38437322	Pv010	38437322	Pv2.1_10_38437322_T/C	T	C	0.119084	0.044335	203	0.258814	0.988987	-1.38555
Pv2.1_10_38246955	Pv010	38246955	Pv2.1_10_38246955_G/C	G	C	0.119084	0.044335	203	0.258814	0.988987	1.38555
Pv2.1_10_38355525	Pv010	38355525	Pv2.1_10_38355525_T/A	T	A	0.119084	0.044335	203	0.258814	0.988987	1.38555
Pv2.1_10_38355526	Pv010	38355526	Pv2.1_10_38355526_G/T	G	T	0.119084	0.044335	203	0.258814	0.988987	1.38555
Pv2.1_10_38355558	Pv010	38355558	Pv2.1_10_38355558_G/A	G	A	0.119084	0.044335	203	0.258814	0.988987	1.38555
Pv2.1_10_38355566	Pv010	38355566	Pv2.1_10_38355566_C/A	C	A	0.119084	0.044335	203	0.258814	0.988987	1.38555
Pv2.1_10_38355722	Pv010	38355722	Pv2.1_10_38355722_C/T	C	T	0.119084	0.044335	203	0.258814	0.988987	1.38555
Pv2.1_10_38393838	Pv010	38393838	Pv2.1_10_38393838_C/T	C	T	0.119084	0.044335	203	0.258814	0.988987	1.38555
Pv2.1_11_52413782	Pv011	52413782	Pv2.1_11_52413782_G/A	G	A	0.119207	0.349754	203	0.258807	0.988987	-0.622812
Pv2.1_04_1371677	Pv04	1371677	Pv2.1_04_1371677_C/T	C	T	0.119324	0.359606	203	0.258801	0.988987	0.751202
Pv2.1_04_1359417	Pv04	1359417	Pv2.1_04_1359417_G/T	G	T	0.119324	0.359606	203	0.258801	0.988987	-0.751202
Pv2.1_04_1359465	Pv04	1359465	Pv2.1_04_1359465_A/G	A	G	0.119324	0.359606	203	0.258801	0.988987	-0.751202
Pv2.1_04_1371692	Pv04	1371692	Pv2.1_04_1371692_T/C	T	C	0.119324	0.359606	203	0.258801	0.988987	-0.751202
Pv2.1_04_45177678	Pv04	45177678	Pv2.1_04_45177678_A/C	A	C	0.11943	0.374384	203	0.258796	0.988987	-0.662215
Pv2.1_02_48766009	Pv02	48766009	Pv2.1_02_48766009_C/A	C	A	0.119655	0.428571	203	0.258785	0.988987	-0.692004
Pv2.1_08_2964676	Pv08	2964676	Pv2.1_08_2964676_T/C	T	C	0.119818	0.359606	203	0.258776	0.988987	0.707178
Pv2.1_08_58430187	Pv08	58430187	Pv2.1_08_58430187_A/C	A	C	0.12	0.0394089	203	0.258767	0.988987	-1.61781
Pv2.1_08_58433811	Pv08	58433811	Pv2.1_08_58433811_A/T	A	T	0.12	0.0394089	203	0.258767	0.988987	-1.61781
Pv2.1_08_58433955	Pv08	58433955	Pv2.1_08_58433955_C/T	C	T	0.12	0.0394089	203	0.258767	0.988987	-1.61781
Pv2.1_08_58433863	Pv08	58433863	Pv2.1_08_58433863_C/A	C	A	0.12	0.0394089	203	0.258767	0.988987	1.61781
Pv2.1_08_58433973	Pv08	58433973	Pv2.1_08_58433973_T/C	T	C	0.12	0.0394089	203	0.258767	0.988987	1.61781
Pv2.1_02_48698691	Pv02	48698691	Pv2.1_02_48698691_T/G	T	G	0.120007	0.381773	203	0.258767	0.988987	0.697321
Pv2.1_02_48698736	Pv02	48698736	Pv2.1_02_48698736_T/C	T	C	0.120007	0.381773	203	0.258767	0.988987	0.697321
Pv2.1_02_48698754	Pv02	48698754	Pv2.1_02_48698754_A/G	A	G	0.120007	0.381773	203	0.258767	0.988987	0.697321
Pv2.1_04_4135608	Pv04	4135608	Pv2.1_04_4135608_T/C	T	C	0.120162	0.174877	203	0.258759	0.988987	0.798565
Pv2.1_04_4135614	Pv04	4135614	Pv2.1_04_4135614_C/T	C	T	0.120162	0.174877	203	0.258759	0.988987	0.798565
Pv2.1_04_4135634	Pv04	4135634	Pv2.1_04_4135634_C/A	C	A	0.120162	0.174877	203	0.258759	0.988987	0.798565
Pv2.1_03_2643523	Pv03	2643523	Pv2.1_03_2643523_T/G	T	G	0.120185	0.1133	203	0.258758	0.988987	-0.992259
Pv2.1_03_2593314	Pv03	2593314	Pv2.1_03_2593314_C/G	C	G	0.120185	0.1133	203	0.258758	0.988987	0.992259
Pv2.1_03_2593358	Pv03	2593358	Pv2.1_03_2593358_C/G	C	G	0.120185	0.1133	203	0.258758	0.988987	0.992259
Pv2.1_03_2624244	Pv03	2624244	Pv2.1_03_2624244_A/G	A	G	0.120185	0.1133	203	0.258758	0.988987	0.992259
Pv2.1_07_39363646	Pv07	39363646	Pv2.1_07_39363646_A/G	A	G	0.120252	0.221675	203	0.258755	0.988987	0.76493
Pv2.1_04_9649732	Pv04	9649732	Pv2.1_04_9649732_G/A	G	A	0.120307	0.108374	203	0.258752	0.988987	-1.09221
Pv2.1_04_22011675	Pv04	22011675	Pv2.1_04_22011675_G/T	G	T	0.120315	0.460591	203	0.258751	0.988987	-0.571437
Pv2.1_08_62249226	Pv08	62249226	Pv2.1_08_62249226_C/T	C	T	0.120388	0.29803	203	0.258748	0.988987	0.86555
Pv2.1_09_29239427	Pv09	29239427	Pv2.1_09_29239427_A/T	A	T	0.120418	0.08867	203	0.258746	0.988987	-0.936891
Pv2.1_03_33548077	Pv03	33548077	Pv2.1_03_33548077_C/A	C	A	0.120426	0.243842	203	0.258746	0.988987	0.714092
Pv2.1_03_33548089	Pv03	33548089	Pv2.1_03_33548089_G/T	G	T	0.120426	0.243842	203	0.258746	0.988987	0.714092
Pv2.1_08_61872876	Pv08	61872876	Pv2.1_08_61872876_A/T	A	T	0.120592	0.224138	203	0.258737	0.988987	-0.885378
Pv2.1_07_4755422	Pv07	4755422	Pv2.1_07_4755422_A/G	A	G	0.120715	0.0985222	203	0.258731	0.988987	1.19365
Pv2.1_07_514888	Pv07	514888	Pv2.1_07_514888_G/C	G	C	0.120841	0.37931	203	0.258725	0.988987	-0.652679
Pv2.1_08_2867863	Pv08	2867863	Pv2.1_08_2867863_G/T	G	T	0.120905	0.128079	203	0.258722	0.988987	-0.847369
Pv2.1_01_954793	Pv01	954793	Pv2.1_01_954793_G/A	G	A	0.120999	0.226601	203	0.258717	0.988987	0.803982
Pv2.1_01_954801	Pv01	954801	Pv2.1_01_954801_G/A	G	A	0.120999	0.226601	203	0.258717	0.988987	0.803982
Pv2.1_01_954818	Pv01	954818	Pv2.1_01_954818_C/T	C	T	0.120999	0.226601	203	0.258717	0.988987	0.803982
Pv2.1_11_51655758	Pv011	51655758	Pv2.1_11_51655758_C/T	C	T	0.121049	0.465517	203	0.258715	0.988987	-0.698267
Pv2.1_07_38018719	Pv07	38018719	Pv2.1_07_38018719_C/T	C	T	0.121096	0.256158	203	0.258712	0.988987	0.745241
Pv2.1_07_38018740	Pv07	38018740	Pv2.1_07_38018740_T/G	T	G	0.121096	0.256158	203	0.258712	0.988987	0.745241
Pv2.1_04_2047832	Pv04	2047832	Pv2.1_04_2047832_C/T	C	T	0.121176	0.23399	203	0.258708	0.988987	-0.793452
Pv2.1_11_46687542	Pv011	46687542	Pv2.1_11_46687542_A/G	A	G	0.121285	0.256158	203	0.258703	0.988987	0.897471
Pv2.1_11_46687555	Pv011	46687555	Pv2.1_11_46687555_C/G	C	G	0.121285	0.256158	203	0.258703	0.988987	0.897471
Pv2.1_04_11379887	Pv04	11379887	Pv2.1_04_11379887_A/G	A	G	0.121395	0.105911	203	0.258697	0.988987	-1.09202
Pv2.1_04_3407878	Pv04	3407878	Pv2.1_04_3407878_T/C	T	C	0.121473	0.128079	203	0.258693	0.988987	-0.905312
Pv2.1_04_3407810	Pv04	3407810	Pv2.1_04_3407810_G/A	G	A	0.121473	0.128079	203	0.258693	0.988987	0.905312
Pv2.1_04_45663390	Pv04	45663390	Pv2.1_04_45663390_A/G	A	G	0.121774	0.241379	203	0.258678	0.988987	-0.882835
Pv2.1_07_4307230	Pv07	4307230	Pv2.1_07_4307230_G/T	G	T	0.121846	0.123153	203	0.258675	0.988987	0.977886
Pv2.1_10_39731623	Pv010	39731623	Pv2.1_10_39731623_C/G	C	G	0.121871	0.243842	203	0.258674	0.988987	0.733142
Pv2.1_11_52774163	Pv011	52774163	Pv2.1_11_52774163_A/G	A	G	0.122025	0.118227	203	0.258666	0.988987	-1.14039
Pv2.1_11_52774173	Pv011	52774173	Pv2.1_11_52774173_G/A	G	A	0.122025	0.118227	203	0.258666	0.988987	-1.14039
Pv2.1_11_53132705	Pv011	53132705	Pv2.1_11_53132705_G/A	G	A	0.122025	0.118227	203	0.258666	0.988987	-1.14039
Pv2.1_11_53256257	Pv011	53256257	Pv2.1_11_53256257_T/A	T	A	0.122025	0.118227	203	0.258666	0.988987	-1.14039
Pv2.1_11_53256262	Pv011	53256262	Pv2.1_11_53256262_T/C	T	C	0.122025	0.118227	203	0.258666	0.988987	-1.14039
Pv2.1_11_53295118	Pv011	53295118	Pv2.1_11_53295118_G/A	G	A	0.122025	0.118227	203	0.258666	0.988987	-1.14039
Pv2.1_11_53381603	Pv011	53381603	Pv2.1_11_53381603_A/T	A	T	0.122025	0.118227	203	0.258666	0.988987	-1.14039
Pv2.1_11_53385194	Pv011	53385194	Pv2.1_11_53385194_A/T	A	T	0.122025	0.118227	203	0.258666	0.988987	-1.14039
Pv2.1_11_53385214	Pv011	53385214	Pv2.1_11_53385214_C/T	C	T	0.122025	0.118227	203	0.258666	0.988987	-1.14039
Pv2.1_11_53385216	Pv011	53385216	Pv2.1_11_53385216_G/T	G	T	0.122025	0.118227	203	0.258666	0.988987	-1.14039
Pv2.1_11_52641127	Pv011	52641127	Pv2.1_11_52641127_T/A	T	A	0.122025	0.118227	203	0.258666	0.988987	1.14039
Pv2.1_11_52773943	Pv011	52773943	Pv2.1_11_52773943_C/T	C	T	0.122025	0.118227	203	0.258666	0.988987	1.14039
Pv2.1_11_52774026	Pv011	52774026	Pv2.1_11_52774026_A/G	A	G	0.122025	0.118227	203	0.258666	0.988987	1.14039
Pv2.1_11_52975210	Pv011	52975210	Pv2.1_11_52975210_C/G	C	G	0.122025	0.118227	203	0.258666	0.988987	1.14039
Pv2.1_11_53132984	Pv011	53132984	Pv2.1_11_53132984_C/T	C	T	0.122025	0.118227	203	0.258666	0.988987	1.14039
Pv2.1_11_53294787	Pv011	53294787	Pv2.1_11_53294787_C/G	C	G	0.122025	0.118227	203	0.258666	0.988987	1.14039
Pv2.1_11_53381739	Pv011	53381739	Pv2.1_11_53381739_G/A	G	A	0.122025	0.118227	203	0.258666	0.988987	1.14039
Pv2.1_10_39753267	Pv010	39753267	Pv2.1_10_39753267_G/A	G	A	0.122093	0.238916	203	0.258663	0.988987	0.733203
Pv2.1_10_39753300	Pv010	39753300	Pv2.1_10_39753300_A/T	A	T	0.122093	0.238916	203	0.258663	0.988987	0.733203
Pv2.1_09_29067483	Pv09	29067483	Pv2.1_09_29067483_G/A	G	A	0.122155	0.115764	203	0.25866	0.988987	0.989483
Pv2.1_11_53567316	Pv011	53567316	Pv2.1_11_53567316_T/C	T	C	0.122469	0.105911	203	0.258644	0.988987	-1.18789
Pv2.1_08_62390887	Pv08	62390887	Pv2.1_08_62390887_C/T	C	T	0.12261	0.133005	203	0.258637	0.988987	-1.22273
Pv2.1_08_62367346	Pv08	62367346	Pv2.1_08_62367346_A/G	A	G	0.12261	0.133005	203	0.258637	0.988987	1.22273
Pv2.1_03_33548123	Pv03	33548123	Pv2.1_03_33548123_G/A	G	A	0.122632	0.241379	203	0.258636	0.988987	0.702914
Pv2.1_08_60744202	Pv08	60744202	Pv2.1_08_60744202_C/A	C	A	0.122723	0.29064	203	0.258632	0.988987	-0.793463
Pv2.1_08_60744246	Pv08	60744246	Pv2.1_08_60744246_T/G	T	G	0.122723	0.29064	203	0.258632	0.988987	-0.793463
Pv2.1_08_60745302	Pv08	60745302	Pv2.1_08_60745302_T/C	T	C	0.122723	0.29064	203	0.258632	0.988987	-0.793463
Pv2.1_08_60745340	Pv08	60745340	Pv2.1_08_60745340_G/A	G	A	0.122723	0.29064	203	0.258632	0.988987	-0.793463
Pv2.1_08_60745314	Pv08	60745314	Pv2.1_08_60745314_G/A	G	A	0.122723	0.29064	203	0.258632	0.988987	0.793463
Pv2.1_03_33537090	Pv03	33537090	Pv2.1_03_33537090_G/A	G	A	0.122964	0.243842	203	0.25862	0.988987	0.716215
Pv2.1_09_10485729	Pv09	10485729	Pv2.1_09_10485729_T/G	T	G	0.123043	0.110837	203	0.258616	0.988987	0.881553
Pv2.1_07_39799922	Pv07	39799922	Pv2.1_07_39799922_G/C	G	C	0.123069	0.128079	203	0.258615	0.988987	0.866242
Pv2.1_07_39801825	Pv07	39801825	Pv2.1_07_39801825_G/A	G	A	0.123069	0.128079	203	0.258615	0.988987	0.866242
Pv2.1_06_19554074	Pv06	19554074	Pv2.1_06_19554074_A/G	A	G	0.12312	0.226601	203	0.258612	0.988987	-1.38516
Pv2.1_10_39731534	Pv010	39731534	Pv2.1_10_39731534_G/A	G	A	0.1232	0.241379	203	0.258608	0.988987	0.733746
Pv2.1_01_929990	Pv01	929990	Pv2.1_01_929990_C/T	C	T	0.123202	0.465517	203	0.258608	0.988987	0.64799
Pv2.1_01_40820470	Pv01	40820470	Pv2.1_01_40820470_T/C	T	C	0.12323	0.389163	203	0.258607	0.988987	-0.626761
Pv2.1_01_40879655	Pv01	40879655	Pv2.1_01_40879655_T/A	T	A	0.12323	0.389163	203	0.258607	0.988987	-0.626761
Pv2.1_01_40882759	Pv01	40882759	Pv2.1_01_40882759_T/C	T	C	0.12323	0.389163	203	0.258607	0.988987	-0.626761
Pv2.1_08_61639149	Pv08	61639149	Pv2.1_08_61639149_T/A	T	A	0.123386	0.231527	203	0.258599	0.988987	0.955842
Pv2.1_08_61642577	Pv08	61642577	Pv2.1_08_61642577_C/T	C	T	0.123386	0.231527	203	0.258599	0.988987	0.955842
Pv2.1_11_53325161	Pv011	53325161	Pv2.1_11_53325161_A/T	A	T	0.123691	0.118227	203	0.258584	0.988987	-1.15113
Pv2.1_08_60266780	Pv08	60266780	Pv2.1_08_60266780_A/T	A	T	0.123774	0.347291	203	0.25858	0.988987	0.696812
Pv2.1_03_34973	Pv03	34973	Pv2.1_03_34973_C/A	C	A	0.12381	0.118227	203	0.258578	0.988987	0.896791
Pv2.1_02_20278841	Pv02	20278841	Pv2.1_02_20278841_T/C	T	C	0.123822	0.0788177	203	0.258578	0.988987	-1.33907
Pv2.1_02_2321070	Pv02	2321070	Pv2.1_02_2321070_A/G	A	G	0.123846	0.300493	203	0.258577	0.988987	-0.678881
Pv2.1_02_2321056	Pv02	2321056	Pv2.1_02_2321056_C/T	C	T	0.123846	0.300493	203	0.258577	0.988987	0.678881
Pv2.1_02_2321068	Pv02	2321068	Pv2.1_02_2321068_G/C	G	C	0.123846	0.300493	203	0.258577	0.988987	0.678881
Pv2.1_02_44976350	Pv02	44976350	Pv2.1_02_44976350_T/G	T	G	0.123908	0.189655	203	0.258574	0.988987	0.81864
Pv2.1_09_28972599	Pv09	28972599	Pv2.1_09_28972599_C/T	C	T	0.124003	0.125616	203	0.258569	0.988987	0.958385
Pv2.1_07_518375	Pv07	518375	Pv2.1_07_518375_T/C	T	C	0.124258	0.3867	203	0.258557	0.988987	-0.647553
Pv2.1_03_53324978	Pv03	53324978	Pv2.1_03_53324978_T/A	T	A	0.124418	0.182266	203	0.258549	0.988987	-0.819871
Pv2.1_03_53339294	Pv03	53339294	Pv2.1_03_53339294_T/G	T	G	0.124418	0.182266	203	0.258549	0.988987	-0.819871
Pv2.1_05_37857802	Pv05	37857802	Pv2.1_05_37857802_C/T	C	T	0.124483	0.349754	203	0.258546	0.988987	0.712918
Pv2.1_05_37857853	Pv05	37857853	Pv2.1_05_37857853_A/T	A	T	0.124483	0.349754	203	0.258546	0.988987	0.712918
Pv2.1_05_37858074	Pv05	37858074	Pv2.1_05_37858074_C/T	C	T	0.124483	0.349754	203	0.258546	0.988987	0.712918
Pv2.1_05_37858077	Pv05	37858077	Pv2.1_05_37858077_G/C	G	C	0.124483	0.349754	203	0.258546	0.988987	0.712918
Pv2.1_05_37858317	Pv05	37858317	Pv2.1_05_37858317_C/A	C	A	0.124483	0.349754	203	0.258546	0.988987	0.712918
Pv2.1_05_37858353	Pv05	37858353	Pv2.1_05_37858353_G/A	G	A	0.124483	0.349754	203	0.258546	0.988987	0.712918
Pv2.1_05_37997436	Pv05	37997436	Pv2.1_05_37997436_A/T	A	T	0.124483	0.349754	203	0.258546	0.988987	0.712918
Pv2.1_04_1920699	Pv04	1920699	Pv2.1_04_1920699_A/G	A	G	0.124659	0.475369	203	0.258537	0.988987	0.703021
Pv2.1_08_58532467	Pv08	58532467	Pv2.1_08_58532467_T/C	T	C	0.124703	0.0344828	203	0.258535	0.988987	1.84551
Pv2.1_02_39932009	Pv02	39932009	Pv2.1_02_39932009_G/A	G	A	0.124903	0.0837438	203	0.258525	0.988987	-1.14546
Pv2.1_09_14645201	Pv09	14645201	Pv2.1_09_14645201_T/C	T	C	0.124908	0.125616	203	0.258525	0.988987	-0.928435
Pv2.1_09_14645220	Pv09	14645220	Pv2.1_09_14645220_G/A	G	A	0.124908	0.125616	203	0.258525	0.988987	-0.928435
Pv2.1_07_39214698	Pv07	39214698	Pv2.1_07_39214698_C/T	C	T	0.124918	0.221675	203	0.258525	0.988987	0.740533
Pv2.1_02_22971334	Pv02	22971334	Pv2.1_02_22971334_C/A	C	A	0.125037	0.307882	203	0.258519	0.988987	0.804756
Pv2.1_05_11941848	Pv05	11941848	Pv2.1_05_11941848_A/G	A	G	0.125122	0.165025	203	0.258515	0.988987	0.93395
Pv2.1_07_9337520	Pv07	9337520	Pv2.1_07_9337520_T/A	T	A	0.125289	0.231527	203	0.258507	0.988987	-0.768177
Pv2.1_03_33533775	Pv03	33533775	Pv2.1_03_33533775_C/G	C	G	0.125355	0.241379	203	0.258504	0.988987	0.704347
Pv2.1_08_13361119	Pv08	13361119	Pv2.1_08_13361119_A/G	A	G	0.125718	0.421182	203	0.258486	0.988987	-0.806487
Pv2.1_05_5470591	Pv05	5470591	Pv2.1_05_5470591_G/A	G	A	0.125816	0.256158	203	0.258481	0.988987	0.70782
Pv2.1_08_57239846	Pv08	57239846	Pv2.1_08_57239846_G/A	G	A	0.125878	0.495074	203	0.258478	0.988987	0.574807
Pv2.1_10_38418353	Pv010	38418353	Pv2.1_10_38418353_C/A	C	A	0.12606	0.046798	203	0.25847	0.988987	1.32655
Pv2.1_07_36713275	Pv07	36713275	Pv2.1_07_36713275_T/C	T	C	0.126148	0.157635	203	0.258466	0.988987	-0.92555
Pv2.1_07_36725752	Pv07	36725752	Pv2.1_07_36725752_A/G	A	G	0.126148	0.157635	203	0.258466	0.988987	-0.92555
Pv2.1_07_36725753	Pv07	36725753	Pv2.1_07_36725753_C/G	C	G	0.126148	0.157635	203	0.258466	0.988987	-0.92555
Pv2.1_08_61266468	Pv08	61266468	Pv2.1_08_61266468_C/T	C	T	0.126166	0.362069	203	0.258465	0.988987	0.817968
Pv2.1_08_61266490	Pv08	61266490	Pv2.1_08_61266490_T/A	T	A	0.126166	0.362069	203	0.258465	0.988987	0.817968
Pv2.1_08_61266523	Pv08	61266523	Pv2.1_08_61266523_C/T	C	T	0.126166	0.362069	203	0.258465	0.988987	0.817968
Pv2.1_11_52609842	Pv011	52609842	Pv2.1_11_52609842_A/T	A	T	0.126313	0.115764	203	0.258458	0.988987	-1.16769
Pv2.1_11_52609864	Pv011	52609864	Pv2.1_11_52609864_A/C	A	C	0.126313	0.115764	203	0.258458	0.988987	-1.16769
Pv2.1_01_929939	Pv01	929939	Pv2.1_01_929939_T/A	T	A	0.12643	0.46798	203	0.258452	0.988987	0.644547
Pv2.1_01_929956	Pv01	929956	Pv2.1_01_929956_C/A	C	A	0.12643	0.46798	203	0.258452	0.988987	0.644547
Pv2.1_01_920815	Pv01	920815	Pv2.1_01_920815_T/A	T	A	0.126573	0.465517	203	0.258445	0.988987	0.639663
Pv2.1_01_920819	Pv01	920819	Pv2.1_01_920819_G/T	G	T	0.126573	0.465517	203	0.258445	0.988987	0.639663
Pv2.1_04_2047846	Pv04	2047846	Pv2.1_04_2047846_A/C	A	C	0.126824	0.359606	203	0.258433	0.988987	-0.741281
Pv2.1_01_863994	Pv01	863994	Pv2.1_01_863994_A/C	A	C	0.126883	0.472906	203	0.258431	0.988987	0.633487
Pv2.1_09_7738508	Pv09	7738508	Pv2.1_09_7738508_T/G	T	G	0.126895	0.251232	203	0.25843	0.988987	-0.637329
Pv2.1_09_7738479	Pv09	7738479	Pv2.1_09_7738479_A/C	A	C	0.126895	0.251232	203	0.25843	0.988987	0.637329
Pv2.1_09_7738507	Pv09	7738507	Pv2.1_09_7738507_C/T	C	T	0.126895	0.251232	203	0.25843	0.988987	0.637329
Pv2.1_02_585569	Pv02	585569	Pv2.1_02_585569_G/A	G	A	0.127381	0.194581	203	0.258407	0.988987	-0.744829
Pv2.1_03_8860025	Pv03	8860025	Pv2.1_03_8860025_A/T	A	T	0.127471	0.241379	203	0.258403	0.988987	0.980761
Pv2.1_10_44210332	Pv010	44210332	Pv2.1_10_44210332_C/T	C	T	0.127645	0.133005	203	0.258395	0.988987	0.903346
Pv2.1_04_45177589	Pv04	45177589	Pv2.1_04_45177589_T/C	T	C	0.127673	0.376847	203	0.258393	0.988987	-0.654978
Pv2.1_08_61260646	Pv08	61260646	Pv2.1_08_61260646_C/T	C	T	0.127837	0.211823	203	0.258386	0.988987	-0.799108
Pv2.1_06_20029403	Pv06	20029403	Pv2.1_06_20029403_G/C	G	C	0.127857	0.216749	203	0.258385	0.988987	1.4168
Pv2.1_02_41768892	Pv02	41768892	Pv2.1_02_41768892_A/C	A	C	0.12788	0.091133	203	0.258384	0.988987	-1.07442
Pv2.1_02_41768915	Pv02	41768915	Pv2.1_02_41768915_C/A	C	A	0.12788	0.091133	203	0.258384	0.988987	-1.07442
Pv2.1_02_41768916	Pv02	41768916	Pv2.1_02_41768916_A/C	A	C	0.12788	0.091133	203	0.258384	0.988987	-1.07442
Pv2.1_11_53567318	Pv011	53567318	Pv2.1_11_53567318_C/T	C	T	0.127892	0.103448	203	0.258383	0.988987	-1.19018
Pv2.1_11_53537554	Pv011	53537554	Pv2.1_11_53537554_T/C	T	C	0.127916	0.118227	203	0.258382	0.988987	-1.13011
Pv2.1_08_61450539	Pv08	61450539	Pv2.1_08_61450539_A/G	A	G	0.127924	0.221675	203	0.258381	0.988987	0.93542
Pv2.1_08_61450573	Pv08	61450573	Pv2.1_08_61450573_C/A	C	A	0.127924	0.221675	203	0.258381	0.988987	0.93542
Pv2.1_07_38093875	Pv07	38093875	Pv2.1_07_38093875_G/A	G	A	0.127967	0.256158	203	0.258379	0.988987	0.714873
Pv2.1_08_42393372	Pv08	42393372	Pv2.1_08_42393372_G/A	G	A	0.128039	0.044335	203	0.258376	0.988987	-1.24137
Pv2.1_09_37920888	Pv09	37920888	Pv2.1_09_37920888_T/C	T	C	0.128279	0.105911	203	0.258365	0.988987	1.40363
Pv2.1_03_7908214	Pv03	7908214	Pv2.1_03_7908214_T/G	T	G	0.128289	0.248768	203	0.258364	0.988987	0.937267
Pv2.1_08_60973936	Pv08	60973936	Pv2.1_08_60973936_G/T	G	T	0.128293	0.137931	203	0.258364	0.988987	0.996956
Pv2.1_08_16175959	Pv08	16175959	Pv2.1_08_16175959_T/A	T	A	0.12847	0.312808	203	0.258356	0.988987	-0.671871
Pv2.1_02_23293664	Pv02	23293664	Pv2.1_02_23293664_C/T	C	T	0.1285	0.307882	203	0.258354	0.988987	0.783677
Pv2.1_10_8060960	Pv010	8060960	Pv2.1_10_8060960_A/G	A	G	0.128828	0.0492611	203	0.258339	0.988987	-1.22754
Pv2.1_07_36655574	Pv07	36655574	Pv2.1_07_36655574_T/G	T	G	0.129112	0.438424	203	0.258326	0.988987	-0.829533
Pv2.1_07_4082708	Pv07	4082708	Pv2.1_07_4082708_C/G	C	G	0.129317	0.428571	203	0.258316	0.988987	0.84437
Pv2.1_07_4082760	Pv07	4082760	Pv2.1_07_4082760_A/C	A	C	0.129317	0.428571	203	0.258316	0.988987	0.84437
Pv2.1_07_4082711	Pv07	4082711	Pv2.1_07_4082711_G/A	G	A	0.129317	0.428571	203	0.258316	0.988987	-0.84437
Pv2.1_07_4082747	Pv07	4082747	Pv2.1_07_4082747_T/A	T	A	0.129317	0.428571	203	0.258316	0.988987	-0.84437
Pv2.1_07_4082957	Pv07	4082957	Pv2.1_07_4082957_T/C	T	C	0.129317	0.428571	203	0.258316	0.988987	-0.84437
Pv2.1_07_4082965	Pv07	4082965	Pv2.1_07_4082965_T/A	T	A	0.129317	0.428571	203	0.258316	0.988987	-0.84437
Pv2.1_10_44079935	Pv010	44079935	Pv2.1_10_44079935_G/C	G	C	0.129392	0.123153	203	0.258313	0.988987	0.907642
Pv2.1_02_44970387	Pv02	44970387	Pv2.1_02_44970387_C/G	C	G	0.12942	0.194581	203	0.258312	0.988987	0.811137
Pv2.1_02_44970388	Pv02	44970388	Pv2.1_02_44970388_A/G	A	G	0.12942	0.194581	203	0.258312	0.988987	0.811137
Pv2.1_11_4719098	Pv011	4719098	Pv2.1_11_4719098_A/T	A	T	0.129736	0.263547	203	0.258297	0.988987	0.641854
Pv2.1_02_10021143	Pv02	10021143	Pv2.1_02_10021143_C/T	C	T	0.129826	0.221675	203	0.258293	0.988987	-0.724819
Pv2.1_02_10517743	Pv02	10517743	Pv2.1_02_10517743_A/G	A	G	0.129826	0.221675	203	0.258293	0.988987	-0.724819
Pv2.1_02_8424079	Pv02	8424079	Pv2.1_02_8424079_C/T	C	T	0.129826	0.221675	203	0.258293	0.988987	0.724819
Pv2.1_06_19542509	Pv06	19542509	Pv2.1_06_19542509_T/A	T	A	0.129951	0.37931	203	0.258287	0.988987	-1.02054
Pv2.1_09_35995485	Pv09	35995485	Pv2.1_09_35995485_A/G	A	G	0.130157	0.137931	203	0.258278	0.988987	0.944899
Pv2.1_09_35995491	Pv09	35995491	Pv2.1_09_35995491_G/T	G	T	0.130157	0.137931	203	0.258278	0.988987	0.944899
Pv2.1_03_34481044	Pv03	34481044	Pv2.1_03_34481044_A/G	A	G	0.130554	0.251232	203	0.258259	0.988987	-0.672522
Pv2.1_03_34481416	Pv03	34481416	Pv2.1_03_34481416_C/G	C	G	0.130554	0.251232	203	0.258259	0.988987	-0.672522
Pv2.1_03_34472381	Pv03	34472381	Pv2.1_03_34472381_T/C	T	C	0.130554	0.251232	203	0.258259	0.988987	0.672522
Pv2.1_01_901902	Pv01	901902	Pv2.1_01_901902_G/C	G	C	0.130821	0.458128	203	0.258247	0.988987	0.636748
Pv2.1_02_39811409	Pv02	39811409	Pv2.1_02_39811409_T/C	T	C	0.130977	0.08867	203	0.25824	0.988987	-1.04047
Pv2.1_03_3610047	Pv03	3610047	Pv2.1_03_3610047_C/T	C	T	0.131083	0.0935961	203	0.258235	0.988987	-1.00021
Pv2.1_02_13946392	Pv02	13946392	Pv2.1_02_13946392_G/A	G	A	0.131132	0.251232	203	0.258233	0.988987	0.775217
Pv2.1_05_36225390	Pv05	36225390	Pv2.1_05_36225390_C/A	C	A	0.131266	0.394089	203	0.258227	0.988987	0.600464
Pv2.1_05_36225413	Pv05	36225413	Pv2.1_05_36225413_T/C	T	C	0.131266	0.394089	203	0.258227	0.988987	0.600464
Pv2.1_05_36225416	Pv05	36225416	Pv2.1_05_36225416_G/A	G	A	0.131266	0.394089	203	0.258227	0.988987	0.600464
Pv2.1_05_36225444	Pv05	36225444	Pv2.1_05_36225444_C/T	C	T	0.131266	0.394089	203	0.258227	0.988987	0.600464
Pv2.1_05_36225638	Pv05	36225638	Pv2.1_05_36225638_T/C	T	C	0.131266	0.394089	203	0.258227	0.988987	0.600464
Pv2.1_02_23328719	Pv02	23328719	Pv2.1_02_23328719_G/A	G	A	0.131268	0.310345	203	0.258227	0.988987	0.790025
Pv2.1_08_62950750	Pv08	62950750	Pv2.1_08_62950750_C/T	C	T	0.131281	0.26601	203	0.258226	0.988987	0.805733
Pv2.1_08_3321180	Pv08	3321180	Pv2.1_08_3321180_T/C	T	C	0.131359	0.135468	203	0.258222	0.988987	0.850409
Pv2.1_04_7281637	Pv04	7281637	Pv2.1_04_7281637_C/T	C	T	0.13136	0.115764	203	0.258222	0.988987	-1.04258
Pv2.1_04_2617088	Pv04	2617088	Pv2.1_04_2617088_G/A	G	A	0.131395	0.465517	203	0.258221	0.988987	0.577172
Pv2.1_04_2617102	Pv04	2617102	Pv2.1_04_2617102_C/T	C	T	0.131395	0.465517	203	0.258221	0.988987	0.577172
Pv2.1_04_2617107	Pv04	2617107	Pv2.1_04_2617107_T/C	T	C	0.131395	0.465517	203	0.258221	0.988987	0.577172
Pv2.1_07_509239	Pv07	509239	Pv2.1_07_509239_G/A	G	A	0.131455	0.376847	203	0.258218	0.988987	-0.637267
Pv2.1_07_514770	Pv07	514770	Pv2.1_07_514770_G/C	G	C	0.131455	0.376847	203	0.258218	0.988987	-0.637267
Pv2.1_07_514777	Pv07	514777	Pv2.1_07_514777_G/A	G	A	0.131455	0.376847	203	0.258218	0.988987	-0.637267
Pv2.1_08_55430355	Pv08	55430355	Pv2.1_08_55430355_A/T	A	T	0.131485	0.320197	203	0.258217	0.988987	0.644391
Pv2.1_03_36404474	Pv03	36404474	Pv2.1_03_36404474_G/A	G	A	0.131678	0.187192	203	0.258208	0.988987	0.898347
Pv2.1_03_36404533	Pv03	36404533	Pv2.1_03_36404533_C/A	C	A	0.131678	0.187192	203	0.258208	0.988987	0.898347
Pv2.1_03_36404543	Pv03	36404543	Pv2.1_03_36404543_C/G	C	G	0.131678	0.187192	203	0.258208	0.988987	0.898347
Pv2.1_03_36404545	Pv03	36404545	Pv2.1_03_36404545_A/G	A	G	0.131678	0.187192	203	0.258208	0.988987	0.898347
Pv2.1_03_36438964	Pv03	36438964	Pv2.1_03_36438964_A/G	A	G	0.131678	0.187192	203	0.258208	0.988987	0.898347
Pv2.1_03_36534875	Pv03	36534875	Pv2.1_03_36534875_C/T	C	T	0.131678	0.187192	203	0.258208	0.988987	0.898347
Pv2.1_03_37126504	Pv03	37126504	Pv2.1_03_37126504_A/G	A	G	0.132028	0.194581	203	0.258192	0.988987	0.860507
Pv2.1_03_37134044	Pv03	37134044	Pv2.1_03_37134044_A/G	A	G	0.132028	0.194581	203	0.258192	0.988987	0.860507
Pv2.1_08_62328085	Pv08	62328085	Pv2.1_08_62328085_A/C	A	C	0.132167	0.08867	203	0.258186	0.988987	1.43644
Pv2.1_08_62863891	Pv08	62863891	Pv2.1_08_62863891_A/G	A	G	0.132167	0.08867	203	0.258186	0.988987	1.43644
Pv2.1_08_61701788	Pv08	61701788	Pv2.1_08_61701788_C/T	C	T	0.132168	0.0640394	203	0.258186	0.988987	1.42125
Pv2.1_04_467210	Pv04	467210	Pv2.1_04_467210_G/T	G	T	0.132412	0.241379	203	0.258175	0.988987	0.774692
Pv2.1_04_455754	Pv04	455754	Pv2.1_04_455754_A/G	A	G	0.132412	0.241379	203	0.258175	0.988987	-0.774692
Pv2.1_04_455755	Pv04	455755	Pv2.1_04_455755_A/G	A	G	0.132412	0.241379	203	0.258175	0.988987	-0.774692
Pv2.1_04_461859	Pv04	461859	Pv2.1_04_461859_T/C	T	C	0.132412	0.241379	203	0.258175	0.988987	-0.774692
Pv2.1_04_467258	Pv04	467258	Pv2.1_04_467258_T/A	T	A	0.132412	0.241379	203	0.258175	0.988987	-0.774692
Pv2.1_04_475918	Pv04	475918	Pv2.1_04_475918_T/C	T	C	0.132412	0.241379	203	0.258175	0.988987	-0.774692
Pv2.1_04_541523	Pv04	541523	Pv2.1_04_541523_T/C	T	C	0.132412	0.241379	203	0.258175	0.988987	-0.774692
Pv2.1_04_541559	Pv04	541559	Pv2.1_04_541559_C/T	C	T	0.132412	0.241379	203	0.258175	0.988987	-0.774692
Pv2.1_08_61200414	Pv08	61200414	Pv2.1_08_61200414_C/A	C	A	0.132451	0.320197	203	0.258173	0.988987	0.880242
Pv2.1_04_3218283	Pv04	3218283	Pv2.1_04_3218283_T/A	T	A	0.132562	0.128079	203	0.258168	0.988987	-0.868313
Pv2.1_04_3202606	Pv04	3202606	Pv2.1_04_3202606_T/C	T	C	0.132562	0.128079	203	0.258168	0.988987	0.868313
Pv2.1_03_34553164	Pv03	34553164	Pv2.1_03_34553164_C/G	C	G	0.132603	0.0541872	203	0.258166	0.988987	-1.12118
Pv2.1_04_2623804	Pv04	2623804	Pv2.1_04_2623804_C/T	C	T	0.132688	0.470443	203	0.258162	0.988987	0.583827
Pv2.1_11_52889907	Pv011	52889907	Pv2.1_11_52889907_C/G	C	G	0.132716	0.206897	203	0.258161	0.988987	-0.760708
Pv2.1_05_4712346	Pv05	4712346	Pv2.1_05_4712346_T/C	T	C	0.13282	0.0960591	203	0.258156	0.988987	-0.977957
Pv2.1_03_9427487	Pv03	9427487	Pv2.1_03_9427487_G/A	G	A	0.132953	0.238916	203	0.25815	0.988987	0.937206
Pv2.1_10_39689580	Pv010	39689580	Pv2.1_10_39689580_G/C	G	C	0.132976	0.241379	203	0.258149	0.988987	0.713585
Pv2.1_10_39735420	Pv010	39735420	Pv2.1_10_39735420_G/A	G	A	0.132976	0.241379	203	0.258149	0.988987	0.713585
Pv2.1_10_39734999	Pv010	39734999	Pv2.1_10_39734999_T/C	T	C	0.132976	0.241379	203	0.258149	0.988987	-0.713585
Pv2.1_07_410092	Pv07	410092	Pv2.1_07_410092_T/C	T	C	0.133018	0.115764	203	0.258147	0.988987	-1.06328
Pv2.1_07_78284	Pv07	78284	Pv2.1_07_78284_C/T	C	T	0.133046	0.133005	203	0.258146	0.988987	-0.889378
Pv2.1_09_36899431	Pv09	36899431	Pv2.1_09_36899431_A/T	A	T	0.133051	0.472906	203	0.258146	0.988987	-0.666722
Pv2.1_07_518354	Pv07	518354	Pv2.1_07_518354_C/T	C	T	0.133094	0.389163	203	0.258144	0.988987	-0.63586
Pv2.1_08_62895181	Pv08	62895181	Pv2.1_08_62895181_T/C	T	C	0.133098	0.394089	203	0.258144	0.988987	-0.667208
Pv2.1_11_52609671	Pv011	52609671	Pv2.1_11_52609671_A/G	A	G	0.133123	0.118227	203	0.258143	0.988987	-1.13738
Pv2.1_10_32118671	Pv010	32118671	Pv2.1_10_32118671_C/T	C	T	0.133324	0.0640394	203	0.258134	0.988987	1.21818
Pv2.1_09_28834820	Pv09	28834820	Pv2.1_09_28834820_T/G	T	G	0.133368	0.125616	203	0.258132	0.988987	0.946147
Pv2.1_02_23210992	Pv02	23210992	Pv2.1_02_23210992_C/A	C	A	0.133419	0.305419	203	0.258129	0.988987	0.768261
Pv2.1_08_60779846	Pv08	60779846	Pv2.1_08_60779846_G/A	G	A	0.133445	0.160099	203	0.258128	0.988987	-0.915795
Pv2.1_02_1650578	Pv02	1650578	Pv2.1_02_1650578_C/T	C	T	0.133796	0.32266	203	0.258112	0.988987	-0.661941
Pv2.1_04_44825390	Pv04	44825390	Pv2.1_04_44825390_A/C	A	C	0.134082	0.108374	203	0.2581	0.988987	1.0182
Pv2.1_11_48080918	Pv011	48080918	Pv2.1_11_48080918_A/C	A	C	0.134101	0.369458	203	0.258099	0.988987	-0.724729
Pv2.1_11_48080933	Pv011	48080933	Pv2.1_11_48080933_C/T	C	T	0.134101	0.369458	203	0.258099	0.988987	-0.724729
Pv2.1_09_29155830	Pv09	29155830	Pv2.1_09_29155830_G/T	G	T	0.134308	0.123153	203	0.25809	0.988987	0.927163
Pv2.1_03_33533735	Pv03	33533735	Pv2.1_03_33533735_T/C	T	C	0.134511	0.238916	203	0.258081	0.988987	0.692479
Pv2.1_05_40795843	Pv05	40795843	Pv2.1_05_40795843_C/T	C	T	0.134603	0.133005	203	0.258076	0.988987	-0.892527
Pv2.1_05_40795851	Pv05	40795851	Pv2.1_05_40795851_T/A	T	A	0.134603	0.133005	203	0.258076	0.988987	-0.892527
Pv2.1_05_40795849	Pv05	40795849	Pv2.1_05_40795849_A/G	A	G	0.134603	0.133005	203	0.258076	0.988987	0.892527
Pv2.1_05_40795857	Pv05	40795857	Pv2.1_05_40795857_T/C	T	C	0.134603	0.133005	203	0.258076	0.988987	0.892527
Pv2.1_05_40795858	Pv05	40795858	Pv2.1_05_40795858_A/G	A	G	0.134603	0.133005	203	0.258076	0.988987	0.892527
Pv2.1_09_37495287	Pv09	37495287	Pv2.1_09_37495287_A/T	A	T	0.1347	0.103448	203	0.258072	0.988987	1.47676
Pv2.1_03_2637636	Pv03	2637636	Pv2.1_03_2637636_T/G	T	G	0.134789	0.1133	203	0.258068	0.988987	-0.963331
Pv2.1_01_43043007	Pv01	43043007	Pv2.1_01_43043007_A/T	A	T	0.134872	0.463054	203	0.258065	0.988987	-0.623752
Pv2.1_01_42986507	Pv01	42986507	Pv2.1_01_42986507_T/A	T	A	0.134872	0.463054	203	0.258065	0.988987	0.623752
Pv2.1_01_43025032	Pv01	43025032	Pv2.1_01_43025032_T/G	T	G	0.134872	0.463054	203	0.258065	0.988987	0.623752
Pv2.1_01_43042981	Pv01	43042981	Pv2.1_01_43042981_G/A	G	A	0.134872	0.463054	203	0.258065	0.988987	0.623752
Pv2.1_01_43073152	Pv01	43073152	Pv2.1_01_43073152_T/A	T	A	0.134872	0.463054	203	0.258065	0.988987	0.623752
Pv2.1_04_448921	Pv04	448921	Pv2.1_04_448921_C/T	C	T	0.135051	0.23399	203	0.258057	0.988987	-0.785937
Pv2.1_06_23576251	Pv06	23576251	Pv2.1_06_23576251_G/C	G	C	0.13525	0.214286	203	0.258048	0.988987	-0.865253
Pv2.1_07_4174334	Pv07	4174334	Pv2.1_07_4174334_G/A	G	A	0.135463	0.20936	203	0.258038	0.988987	0.826527
Pv2.1_07_414945	Pv07	414945	Pv2.1_07_414945_T/C	T	C	0.135487	0.115764	203	0.258037	0.988987	-1.07014
Pv2.1_07_414951	Pv07	414951	Pv2.1_07_414951_G/C	G	C	0.135487	0.115764	203	0.258037	0.988987	-1.07014
Pv2.1_07_414965	Pv07	414965	Pv2.1_07_414965_C/T	C	T	0.135487	0.115764	203	0.258037	0.988987	-1.07014
Pv2.1_07_414971	Pv07	414971	Pv2.1_07_414971_T/G	T	G	0.135487	0.115764	203	0.258037	0.988987	-1.07014
Pv2.1_07_414972	Pv07	414972	Pv2.1_07_414972_A/C	A	C	0.135487	0.115764	203	0.258037	0.988987	-1.07014
Pv2.1_10_4906655	Pv010	4906655	Pv2.1_10_4906655_A/T	A	T	0.135524	0.362069	203	0.258036	0.988987	0.749776
Pv2.1_09_29132506	Pv09	29132506	Pv2.1_09_29132506_A/G	A	G	0.135619	0.128079	203	0.258032	0.988987	0.916843
Pv2.1_09_29132580	Pv09	29132580	Pv2.1_09_29132580_C/A	C	A	0.135619	0.128079	203	0.258032	0.988987	0.916843
Pv2.1_04_1322187	Pv04	1322187	Pv2.1_04_1322187_A/C	A	C	0.135888	0.371921	203	0.25802	0.988987	-0.717959
Pv2.1_10_43183736	Pv010	43183736	Pv2.1_10_43183736_A/G	A	G	0.13594	0.0985222	203	0.258017	0.988987	0.992137
Pv2.1_10_43185841	Pv010	43185841	Pv2.1_10_43185841_A/G	A	G	0.13594	0.0985222	203	0.258017	0.988987	0.992137
Pv2.1_10_43151303	Pv010	43151303	Pv2.1_10_43151303_C/T	C	T	0.13594	0.0985222	203	0.258017	0.988987	-0.992137
Pv2.1_10_43185833	Pv010	43185833	Pv2.1_10_43185833_G/A	G	A	0.13594	0.0985222	203	0.258017	0.988987	-0.992137
Pv2.1_04_1317120	Pv04	1317120	Pv2.1_04_1317120_T/A	T	A	0.136023	0.364532	203	0.258014	0.988987	-0.725217
Pv2.1_03_52961221	Pv03	52961221	Pv2.1_03_52961221_A/G	A	G	0.136044	0.0935961	203	0.258013	0.988987	-0.995917
Pv2.1_08_60284230	Pv08	60284230	Pv2.1_08_60284230_C/A	C	A	0.136188	0.357143	203	0.258007	0.988987	0.660283
Pv2.1_08_60284261	Pv08	60284261	Pv2.1_08_60284261_G/A	G	A	0.136188	0.357143	203	0.258007	0.988987	0.660283
Pv2.1_04_1359571	Pv04	1359571	Pv2.1_04_1359571_C/T	C	T	0.136188	0.362069	203	0.258007	0.988987	-0.719529
Pv2.1_09_28750301	Pv09	28750301	Pv2.1_09_28750301_G/C	G	C	0.136261	0.123153	203	0.258003	0.988987	0.944304
Pv2.1_07_32331988	Pv07	32331988	Pv2.1_07_32331988_G/T	G	T	0.136554	0.433498	203	0.257991	0.988987	0.937764
Pv2.1_10_42038264	Pv010	42038264	Pv2.1_10_42038264_A/G	A	G	0.136562	0.182266	203	0.25799	0.988987	0.838759
Pv2.1_10_42038430	Pv010	42038430	Pv2.1_10_42038430_C/T	C	T	0.136562	0.182266	203	0.25799	0.988987	0.838759
Pv2.1_07_4243650	Pv07	4243650	Pv2.1_07_4243650_G/A	G	A	0.136563	0.118227	203	0.25799	0.988987	0.943757
Pv2.1_03_7150944	Pv03	7150944	Pv2.1_03_7150944_C/T	C	T	0.13662	0.325123	203	0.257988	0.988987	0.709631
Pv2.1_03_7151020	Pv03	7151020	Pv2.1_03_7151020_A/G	A	G	0.13662	0.325123	203	0.257988	0.988987	0.709631
Pv2.1_10_43607255	Pv010	43607255	Pv2.1_10_43607255_A/G	A	G	0.137019	0.12069	203	0.25797	0.988987	0.921381
Pv2.1_03_36213112	Pv03	36213112	Pv2.1_03_36213112_A/G	A	G	0.13722	0.0270936	203	0.257962	0.988987	1.54182
Pv2.1_08_3406987	Pv08	3406987	Pv2.1_08_3406987_C/T	C	T	0.137393	0.14532	203	0.257954	0.988987	0.811126
Pv2.1_08_3407003	Pv08	3407003	Pv2.1_08_3407003_T/G	T	G	0.137393	0.14532	203	0.257954	0.988987	0.811126
Pv2.1_09_29268109	Pv09	29268109	Pv2.1_09_29268109_G/A	G	A	0.137401	0.128079	203	0.257954	0.988987	0.896407
Pv2.1_04_1359293	Pv04	1359293	Pv2.1_04_1359293_A/C	A	C	0.137652	0.357143	203	0.257943	0.988987	-0.716105
Pv2.1_08_61725379	Pv08	61725379	Pv2.1_08_61725379_T/C	T	C	0.137803	0.29803	203	0.257936	0.988987	0.901851
Pv2.1_04_12205267	Pv04	12205267	Pv2.1_04_12205267_A/G	A	G	0.137822	0.103448	203	0.257936	0.988987	0.993198
Pv2.1_10_40961442	Pv010	40961442	Pv2.1_10_40961442_T/C	T	C	0.137874	0.192118	203	0.257933	0.988987	0.795826
Pv2.1_10_40961443	Pv010	40961443	Pv2.1_10_40961443_C/A	C	A	0.137874	0.192118	203	0.257933	0.988987	0.795826
Pv2.1_10_40961448	Pv010	40961448	Pv2.1_10_40961448_G/A	G	A	0.137874	0.192118	203	0.257933	0.988987	0.795826
Pv2.1_10_40968715	Pv010	40968715	Pv2.1_10_40968715_T/C	T	C	0.137874	0.192118	203	0.257933	0.988987	0.795826
Pv2.1_02_1895484	Pv02	1895484	Pv2.1_02_1895484_T/A	T	A	0.137932	0.182266	203	0.257931	0.988987	-0.762526
Pv2.1_08_60451009	Pv08	60451009	Pv2.1_08_60451009_A/G	A	G	0.138086	0.295567	203	0.257924	0.988987	-0.755787
Pv2.1_03_7073904	Pv03	7073904	Pv2.1_03_7073904_C/G	C	G	0.138311	0.332512	203	0.257914	0.988987	0.718368
Pv2.1_03_7073916	Pv03	7073916	Pv2.1_03_7073916_G/C	G	C	0.138311	0.332512	203	0.257914	0.988987	0.718368
Pv2.1_02_44970381	Pv02	44970381	Pv2.1_02_44970381_C/A	C	A	0.138382	0.194581	203	0.257911	0.988987	0.796567
Pv2.1_02_44970383	Pv02	44970383	Pv2.1_02_44970383_A/G	A	G	0.138382	0.194581	203	0.257911	0.988987	0.796567
Pv2.1_02_23291462	Pv02	23291462	Pv2.1_02_23291462_G/A	G	A	0.138393	0.302956	203	0.257911	0.988987	0.759144
Pv2.1_04_476033	Pv04	476033	Pv2.1_04_476033_T/A	T	A	0.138421	0.241379	203	0.25791	0.988987	-0.74328
Pv2.1_10_23308018	Pv010	23308018	Pv2.1_10_23308018_T/C	T	C	0.138464	0.0615764	203	0.257908	0.988987	1.23727
Pv2.1_09_29132437	Pv09	29132437	Pv2.1_09_29132437_G/C	G	C	0.138511	0.125616	203	0.257906	0.988987	0.914926
Pv2.1_09_29132457	Pv09	29132457	Pv2.1_09_29132457_G/A	G	A	0.138511	0.125616	203	0.257906	0.988987	0.914926
Pv2.1_09_29132464	Pv09	29132464	Pv2.1_09_29132464_G/A	G	A	0.138511	0.125616	203	0.257906	0.988987	0.914926
Pv2.1_03_8119148	Pv03	8119148	Pv2.1_03_8119148_G/A	G	A	0.138791	0.253695	203	0.257894	0.988987	0.876465
Pv2.1_03_8119152	Pv03	8119152	Pv2.1_03_8119152_A/G	A	G	0.138791	0.253695	203	0.257894	0.988987	0.876465
Pv2.1_04_4571558	Pv04	4571558	Pv2.1_04_4571558_A/T	A	T	0.138819	0.396552	203	0.257893	0.988987	-0.641406
Pv2.1_09_28252973	Pv09	28252973	Pv2.1_09_28252973_G/A	G	A	0.138991	0.118227	203	0.257885	0.988987	0.934191
Pv2.1_09_28287391	Pv09	28287391	Pv2.1_09_28287391_G/A	G	A	0.138991	0.118227	203	0.257885	0.988987	0.934191
Pv2.1_05_40443819	Pv05	40443819	Pv2.1_05_40443819_C/T	C	T	0.139004	0.371921	203	0.257885	0.988987	-0.579203
Pv2.1_05_40443849	Pv05	40443849	Pv2.1_05_40443849_T/G	T	G	0.139004	0.371921	203	0.257885	0.988987	-0.579203
Pv2.1_08_61872731	Pv08	61872731	Pv2.1_08_61872731_T/G	T	G	0.139121	0.172414	203	0.25788	0.988987	-0.936363
Pv2.1_08_61872771	Pv08	61872771	Pv2.1_08_61872771_T/C	T	C	0.139121	0.172414	203	0.25788	0.988987	-0.936363
Pv2.1_04_4571506	Pv04	4571506	Pv2.1_04_4571506_G/T	G	T	0.139192	0.401478	203	0.257877	0.988987	-0.640974
Pv2.1_08_60284240	Pv08	60284240	Pv2.1_08_60284240_A/G	A	G	0.1392	0.317734	203	0.257876	0.988987	0.692932
Pv2.1_08_60284258	Pv08	60284258	Pv2.1_08_60284258_C/T	C	T	0.1392	0.317734	203	0.257876	0.988987	0.692932
Pv2.1_08_60284273	Pv08	60284273	Pv2.1_08_60284273_C/T	C	T	0.1392	0.317734	203	0.257876	0.988987	0.692932
Pv2.1_05_4712215	Pv05	4712215	Pv2.1_05_4712215_T/C	T	C	0.139282	0.08867	203	0.257873	0.988987	-1.00363
Pv2.1_05_4712246	Pv05	4712246	Pv2.1_05_4712246_T/G	T	G	0.139282	0.08867	203	0.257873	0.988987	-1.00363
Pv2.1_09_36725423	Pv09	36725423	Pv2.1_09_36725423_G/A	G	A	0.139298	0.320197	203	0.257872	0.988987	-0.704278
Pv2.1_09_36703621	Pv09	36703621	Pv2.1_09_36703621_C/G	C	G	0.139298	0.320197	203	0.257872	0.988987	0.704278
Pv2.1_04_63566	Pv04	63566	Pv2.1_04_63566_T/G	T	G	0.139367	0.115764	203	0.257869	0.988987	-0.918167
Pv2.1_04_146620	Pv04	146620	Pv2.1_04_146620_A/G	A	G	0.139367	0.115764	203	0.257869	0.988987	-0.918167
Pv2.1_11_50568997	Pv011	50568997	Pv2.1_11_50568997_G/T	G	T	0.139372	0.224138	203	0.257869	0.988987	-0.922772
Pv2.1_02_1630087	Pv02	1630087	Pv2.1_02_1630087_A/C	A	C	0.139597	0.317734	203	0.257859	0.988987	-0.658638
Pv2.1_08_61185281	Pv08	61185281	Pv2.1_08_61185281_C/T	C	T	0.139627	0.495074	203	0.257858	0.988987	0.709587
Pv2.1_01_854123	Pv01	854123	Pv2.1_01_854123_A/G	A	G	0.139737	0.463054	203	0.257853	0.988987	0.624257
Pv2.1_05_37949318	Pv05	37949318	Pv2.1_05_37949318_A/T	A	T	0.139788	0.349754	203	0.257851	0.988987	0.690994
Pv2.1_02_23277575	Pv02	23277575	Pv2.1_02_23277575_T/A	T	A	0.139789	0.305419	203	0.257851	0.988987	0.772217
Pv2.1_06_19454518	Pv06	19454518	Pv2.1_06_19454518_C/A	C	A	0.1398	0.37931	203	0.257851	0.988987	-1.03907
Pv2.1_06_19454520	Pv06	19454520	Pv2.1_06_19454520_A/T	A	T	0.1398	0.37931	203	0.257851	0.988987	-1.03907
Pv2.1_07_1371071	Pv07	1371071	Pv2.1_07_1371071_C/T	C	T	0.139818	0.123153	203	0.25785	0.988987	-0.821353
Pv2.1_03_34469565	Pv03	34469565	Pv2.1_03_34469565_C/A	C	A	0.139913	0.251232	203	0.257846	0.988987	0.663195
Pv2.1_07_514900	Pv07	514900	Pv2.1_07_514900_G/A	G	A	0.139922	0.381773	203	0.257846	0.988987	-0.620476
Pv2.1_07_514917	Pv07	514917	Pv2.1_07_514917_A/G	A	G	0.139922	0.381773	203	0.257846	0.988987	-0.620476
Pv2.1_08_62183520	Pv08	62183520	Pv2.1_08_62183520_C/T	C	T	0.139939	0.172414	203	0.257845	0.988987	-0.888463
Pv2.1_07_38735026	Pv07	38735026	Pv2.1_07_38735026_G/C	G	C	0.140171	0.08867	203	0.257835	0.988987	-1.14212
Pv2.1_07_38734831	Pv07	38734831	Pv2.1_07_38734831_C/T	C	T	0.140171	0.08867	203	0.257835	0.988987	1.14212
Pv2.1_07_38735032	Pv07	38735032	Pv2.1_07_38735032_A/C	A	C	0.140171	0.08867	203	0.257835	0.988987	1.14212
Pv2.1_07_38735034	Pv07	38735034	Pv2.1_07_38735034_A/G	A	G	0.140171	0.08867	203	0.257835	0.988987	1.14212
Pv2.1_10_5850976	Pv010	5850976	Pv2.1_10_5850976_C/T	C	T	0.140283	0.231527	203	0.25783	0.988987	-0.810006
Pv2.1_11_51916480	Pv011	51916480	Pv2.1_11_51916480_C/T	C	T	0.140322	0.110837	203	0.257829	0.988987	-1.12538
Pv2.1_11_52318151	Pv011	52318151	Pv2.1_11_52318151_A/G	A	G	0.140322	0.110837	203	0.257829	0.988987	-1.12538
Pv2.1_11_52984655	Pv011	52984655	Pv2.1_11_52984655_A/T	A	T	0.140322	0.110837	203	0.257829	0.988987	-1.12538
Pv2.1_04_11379818	Pv04	11379818	Pv2.1_04_11379818_A/T	A	T	0.140705	0.1133	203	0.257812	0.988987	-0.97615
Pv2.1_04_11405725	Pv04	11405725	Pv2.1_04_11405725_A/G	A	G	0.140705	0.1133	203	0.257812	0.988987	-0.97615
Pv2.1_04_11405792	Pv04	11405792	Pv2.1_04_11405792_A/T	A	T	0.140705	0.1133	203	0.257812	0.988987	-0.97615
Pv2.1_03_31137998	Pv03	31137998	Pv2.1_03_31137998_A/C	A	C	0.141039	0.0935961	203	0.257798	0.988987	0.961777
Pv2.1_07_39202205	Pv07	39202205	Pv2.1_07_39202205_C/G	C	G	0.141151	0.100985	203	0.257794	0.988987	0.97364
Pv2.1_09_28322824	Pv09	28322824	Pv2.1_09_28322824_A/T	A	T	0.141188	0.118227	203	0.257792	0.988987	-0.911095
Pv2.1_09_28322833	Pv09	28322833	Pv2.1_09_28322833_C/T	C	T	0.141188	0.118227	203	0.257792	0.988987	-0.911095
Pv2.1_09_28617837	Pv09	28617837	Pv2.1_09_28617837_C/A	C	A	0.141188	0.118227	203	0.257792	0.988987	-0.911095
Pv2.1_09_28322890	Pv09	28322890	Pv2.1_09_28322890_A/T	A	T	0.141188	0.118227	203	0.257792	0.988987	0.911095
Pv2.1_09_28322918	Pv09	28322918	Pv2.1_09_28322918_T/C	T	C	0.141188	0.118227	203	0.257792	0.988987	0.911095
Pv2.1_09_28617492	Pv09	28617492	Pv2.1_09_28617492_T/C	T	C	0.141188	0.118227	203	0.257792	0.988987	0.911095
Pv2.1_06_21414358	Pv06	21414358	Pv2.1_06_21414358_C/T	C	T	0.141208	0.123153	203	0.257791	0.988987	-1.48964
Pv2.1_06_21414425	Pv06	21414425	Pv2.1_06_21414425_C/A	C	A	0.141208	0.123153	203	0.257791	0.988987	1.48964
Pv2.1_07_30293242	Pv07	30293242	Pv2.1_07_30293242_A/C	A	C	0.141229	0.44335	203	0.25779	0.988987	0.743187
Pv2.1_03_33564201	Pv03	33564201	Pv2.1_03_33564201_C/T	C	T	0.141239	0.229064	203	0.25779	0.988987	0.689882
Pv2.1_04_1919927	Pv04	1919927	Pv2.1_04_1919927_G/A	G	A	0.141299	0.477833	203	0.257787	0.988987	0.68988
Pv2.1_02_39814212	Pv02	39814212	Pv2.1_02_39814212_A/G	A	G	0.141351	0.0862069	203	0.257785	0.988987	-1.06292
Pv2.1_02_39814232	Pv02	39814232	Pv2.1_02_39814232_C/T	C	T	0.141351	0.0862069	203	0.257785	0.988987	-1.06292
Pv2.1_02_39969892	Pv02	39969892	Pv2.1_02_39969892_A/G	A	G	0.141351	0.0862069	203	0.257785	0.988987	-1.06292
Pv2.1_02_39973332	Pv02	39973332	Pv2.1_02_39973332_A/G	A	G	0.141351	0.0862069	203	0.257785	0.988987	-1.06292
Pv2.1_10_7761991	Pv010	7761991	Pv2.1_10_7761991_T/C	T	C	0.141593	0.0960591	203	0.257775	0.988987	0.960031
Pv2.1_03_33567570	Pv03	33567570	Pv2.1_03_33567570_G/A	G	A	0.141659	0.243842	203	0.257772	0.988987	0.671213
Pv2.1_01_35997897	Pv01	35997897	Pv2.1_01_35997897_G/A	G	A	0.141667	0.256158	203	0.257772	0.988987	-0.61614
Pv2.1_06_2580479	Pv06	2580479	Pv2.1_06_2580479_T/A	T	A	0.141695	0.465517	203	0.257771	0.988987	0.692932
Pv2.1_03_2631624	Pv03	2631624	Pv2.1_03_2631624_T/C	T	C	0.1417	0.389163	203	0.257771	0.988987	-0.595902
Pv2.1_09_28287133	Pv09	28287133	Pv2.1_09_28287133_G/T	G	T	0.141769	0.115764	203	0.257768	0.988987	0.933355
Pv2.1_04_1686917	Pv04	1686917	Pv2.1_04_1686917_A/T	A	T	0.141822	0.172414	203	0.257765	0.988987	0.794803
Pv2.1_02_11948793	Pv02	11948793	Pv2.1_02_11948793_T/A	T	A	0.141906	0.0837438	203	0.257762	0.988987	1.19195
Pv2.1_02_11891545	Pv02	11891545	Pv2.1_02_11891545_C/T	C	T	0.141906	0.0837438	203	0.257762	0.988987	-1.19195
Pv2.1_02_11930438	Pv02	11930438	Pv2.1_02_11930438_A/G	A	G	0.141906	0.0837438	203	0.257762	0.988987	-1.19195
Pv2.1_02_11948590	Pv02	11948590	Pv2.1_02_11948590_T/C	T	C	0.141906	0.0837438	203	0.257762	0.988987	-1.19195
Pv2.1_02_11949238	Pv02	11949238	Pv2.1_02_11949238_C/T	C	T	0.141906	0.0837438	203	0.257762	0.988987	-1.19195
Pv2.1_02_11951988	Pv02	11951988	Pv2.1_02_11951988_G/C	G	C	0.141906	0.0837438	203	0.257762	0.988987	-1.19195
Pv2.1_02_11952761	Pv02	11952761	Pv2.1_02_11952761_A/G	A	G	0.141906	0.0837438	203	0.257762	0.988987	-1.19195
Pv2.1_02_11952764	Pv02	11952764	Pv2.1_02_11952764_G/T	G	T	0.141906	0.0837438	203	0.257762	0.988987	-1.19195
Pv2.1_02_12455171	Pv02	12455171	Pv2.1_02_12455171_C/A	C	A	0.141906	0.0837438	203	0.257762	0.988987	-1.19195
Pv2.1_02_12633756	Pv02	12633756	Pv2.1_02_12633756_G/A	G	A	0.141906	0.0837438	203	0.257762	0.988987	-1.19195
Pv2.1_02_12634002	Pv02	12634002	Pv2.1_02_12634002_G/A	G	A	0.141906	0.0837438	203	0.257762	0.988987	-1.19195
Pv2.1_02_12667004	Pv02	12667004	Pv2.1_02_12667004_G/T	G	T	0.141906	0.0837438	203	0.257762	0.988987	-1.19195
Pv2.1_02_12667007	Pv02	12667007	Pv2.1_02_12667007_G/T	G	T	0.141906	0.0837438	203	0.257762	0.988987	-1.19195
Pv2.1_02_12698357	Pv02	12698357	Pv2.1_02_12698357_G/A	G	A	0.141906	0.0837438	203	0.257762	0.988987	-1.19195
Pv2.1_02_13367807	Pv02	13367807	Pv2.1_02_13367807_G/A	G	A	0.141906	0.0837438	203	0.257762	0.988987	-1.19195
Pv2.1_02_13772115	Pv02	13772115	Pv2.1_02_13772115_C/A	C	A	0.141906	0.0837438	203	0.257762	0.988987	-1.19195
Pv2.1_10_5847603	Pv010	5847603	Pv2.1_10_5847603_G/A	G	A	0.141979	0.226601	203	0.257759	0.988987	-0.816145
Pv2.1_10_43819544	Pv010	43819544	Pv2.1_10_43819544_A/C	A	C	0.142217	0.1133	203	0.257749	0.988987	0.939753
Pv2.1_10_43821443	Pv010	43821443	Pv2.1_10_43821443_C/T	C	T	0.142217	0.1133	203	0.257749	0.988987	0.939753
Pv2.1_10_43819776	Pv010	43819776	Pv2.1_10_43819776_C/A	C	A	0.142217	0.1133	203	0.257749	0.988987	-0.939753
Pv2.1_10_43819791	Pv010	43819791	Pv2.1_10_43819791_G/A	G	A	0.142217	0.1133	203	0.257749	0.988987	-0.939753
Pv2.1_10_43821434	Pv010	43821434	Pv2.1_10_43821434_T/C	T	C	0.142217	0.1133	203	0.257749	0.988987	-0.939753
Pv2.1_08_62188632	Pv08	62188632	Pv2.1_08_62188632_G/A	G	A	0.14237	0.29803	203	0.257743	0.988987	-0.830425
Pv2.1_11_4718960	Pv011	4718960	Pv2.1_11_4718960_C/T	C	T	0.142371	0.261084	203	0.257743	0.988987	0.619133
Pv2.1_07_32137873	Pv07	32137873	Pv2.1_07_32137873_G/A	G	A	0.142689	0.431034	203	0.257729	0.988987	0.923174
Pv2.1_04_45343063	Pv04	45343063	Pv2.1_04_45343063_T/G	T	G	0.142712	0.103448	203	0.257728	0.988987	1.02728
Pv2.1_04_45352790	Pv04	45352790	Pv2.1_04_45352790_G/A	G	A	0.142712	0.103448	203	0.257728	0.988987	1.02728
Pv2.1_04_45352945	Pv04	45352945	Pv2.1_04_45352945_G/A	G	A	0.142712	0.103448	203	0.257728	0.988987	1.02728
Pv2.1_04_45355895	Pv04	45355895	Pv2.1_04_45355895_C/A	C	A	0.142712	0.103448	203	0.257728	0.988987	1.02728
Pv2.1_04_45356178	Pv04	45356178	Pv2.1_04_45356178_T/A	T	A	0.142712	0.103448	203	0.257728	0.988987	1.02728
Pv2.1_04_45442241	Pv04	45442241	Pv2.1_04_45442241_C/T	C	T	0.142712	0.103448	203	0.257728	0.988987	1.02728
Pv2.1_04_45445029	Pv04	45445029	Pv2.1_04_45445029_T/C	T	C	0.142712	0.103448	203	0.257728	0.988987	1.02728
Pv2.1_04_45448830	Pv04	45448830	Pv2.1_04_45448830_A/G	A	G	0.142712	0.103448	203	0.257728	0.988987	1.02728
Pv2.1_03_33612055	Pv03	33612055	Pv2.1_03_33612055_G/A	G	A	0.142744	0.246305	203	0.257727	0.988987	0.672482
Pv2.1_04_2356656	Pv04	2356656	Pv2.1_04_2356656_C/T	C	T	0.143159	0.147783	203	0.25771	0.988987	-0.915464
Pv2.1_08_62048209	Pv08	62048209	Pv2.1_08_62048209_A/C	A	C	0.143322	0.389163	203	0.257703	0.988987	-0.761899
Pv2.1_08_62048210	Pv08	62048210	Pv2.1_08_62048210_T/G	T	G	0.143322	0.389163	203	0.257703	0.988987	-0.761899
Pv2.1_09_36859871	Pv09	36859871	Pv2.1_09_36859871_C/A	C	A	0.143736	0.371921	203	0.257686	0.988987	0.671632
Pv2.1_08_60583881	Pv08	60583881	Pv2.1_08_60583881_C/T	C	T	0.143753	0.0320197	203	0.257685	0.988987	2.05025
Pv2.1_09_13419461	Pv09	13419461	Pv2.1_09_13419461_A/T	A	T	0.14392	0.142857	203	0.257678	0.988987	-0.852544
Pv2.1_09_13419593	Pv09	13419593	Pv2.1_09_13419593_T/C	T	C	0.14392	0.142857	203	0.257678	0.988987	-0.852544
Pv2.1_09_13551285	Pv09	13551285	Pv2.1_09_13551285_C/G	C	G	0.14392	0.142857	203	0.257678	0.988987	-0.852544
Pv2.1_09_13559644	Pv09	13559644	Pv2.1_09_13559644_C/G	C	G	0.14392	0.142857	203	0.257678	0.988987	-0.852544
Pv2.1_08_3430102	Pv08	3430102	Pv2.1_08_3430102_C/T	C	T	0.14395	0.142857	203	0.257677	0.988987	0.815139
Pv2.1_07_4245047	Pv07	4245047	Pv2.1_07_4245047_A/G	A	G	0.14405	0.123153	203	0.257673	0.988987	0.909777
Pv2.1_08_3304866	Pv08	3304866	Pv2.1_08_3304866_T/G	T	G	0.144121	0.137931	203	0.25767	0.988987	0.821043
Pv2.1_02_23133217	Pv02	23133217	Pv2.1_02_23133217_A/G	A	G	0.144188	0.310345	203	0.257667	0.988987	0.750949
Pv2.1_05_39679435	Pv05	39679435	Pv2.1_05_39679435_C/G	C	G	0.14437	0.167488	203	0.25766	0.988987	-0.784434
Pv2.1_03_53397898	Pv03	53397898	Pv2.1_03_53397898_A/G	A	G	0.144451	0.187192	203	0.257657	0.988987	-0.771939
Pv2.1_10_39689653	Pv010	39689653	Pv2.1_10_39689653_A/T	A	T	0.144455	0.236453	203	0.257656	0.988987	0.700036
Pv2.1_07_37288828	Pv07	37288828	Pv2.1_07_37288828_G/T	G	T	0.144534	0.08867	203	0.257653	0.988987	-1.07004
Pv2.1_08_61685075	Pv08	61685075	Pv2.1_08_61685075_C/A	C	A	0.144686	0.236453	203	0.257647	0.988987	0.890572
Pv2.1_08_61685123	Pv08	61685123	Pv2.1_08_61685123_A/T	A	T	0.144686	0.236453	203	0.257647	0.988987	0.890572
Pv2.1_11_51869745	Pv011	51869745	Pv2.1_11_51869745_G/C	G	C	0.144951	0.110837	203	0.257636	0.988987	-1.04843
Pv2.1_08_62240567	Pv08	62240567	Pv2.1_08_62240567_C/T	C	T	0.144976	0.283251	203	0.257635	0.988987	0.868026
Pv2.1_03_53066847	Pv03	53066847	Pv2.1_03_53066847_G/T	G	T	0.145112	0.184729	203	0.25763	0.988987	-0.803355
Pv2.1_03_53066863	Pv03	53066863	Pv2.1_03_53066863_C/T	C	T	0.145112	0.184729	203	0.25763	0.988987	-0.803355
Pv2.1_04_63535	Pv04	63535	Pv2.1_04_63535_A/T	A	T	0.145233	0.123153	203	0.257625	0.988987	0.880306
Pv2.1_04_69055	Pv04	69055	Pv2.1_04_69055_G/A	G	A	0.145233	0.123153	203	0.257625	0.988987	0.880306
Pv2.1_09_35808422	Pv09	35808422	Pv2.1_09_35808422_A/G	A	G	0.145239	0.140394	203	0.257624	0.988987	0.930462
Pv2.1_08_60451273	Pv08	60451273	Pv2.1_08_60451273_A/C	A	C	0.14546	0.330049	203	0.257615	0.988987	-0.730305
Pv2.1_08_9700906	Pv08	9700906	Pv2.1_08_9700906_C/G	C	G	0.145528	0.46798	203	0.257613	0.988987	-0.643126
Pv2.1_08_9700930	Pv08	9700930	Pv2.1_08_9700930_G/A	G	A	0.145528	0.46798	203	0.257613	0.988987	-0.643126
Pv2.1_02_39973230	Pv02	39973230	Pv2.1_02_39973230_G/A	G	A	0.145533	0.0862069	203	0.257612	0.988987	-1.06944
Pv2.1_04_45641822	Pv04	45641822	Pv2.1_04_45641822_G/A	G	A	0.145674	0.231527	203	0.257607	0.988987	-0.815298
Pv2.1_04_45641843	Pv04	45641843	Pv2.1_04_45641843_T/A	T	A	0.145674	0.231527	203	0.257607	0.988987	-0.815298
Pv2.1_06_20278149	Pv06	20278149	Pv2.1_06_20278149_G/A	G	A	0.145753	0.229064	203	0.257604	0.988987	-1.21135
Pv2.1_08_61872830	Pv08	61872830	Pv2.1_08_61872830_T/C	T	C	0.145756	0.174877	203	0.257603	0.988987	-0.915865
Pv2.1_06_7068154	Pv06	7068154	Pv2.1_06_7068154_G/A	G	A	0.145811	0.3867	203	0.257601	0.988987	0.67123
Pv2.1_06_7068204	Pv06	7068204	Pv2.1_06_7068204_G/A	G	A	0.145811	0.3867	203	0.257601	0.988987	0.67123
Pv2.1_06_7068210	Pv06	7068210	Pv2.1_06_7068210_C/T	C	T	0.145811	0.3867	203	0.257601	0.988987	0.67123
Pv2.1_04_11936385	Pv04	11936385	Pv2.1_04_11936385_G/C	G	C	0.145943	0.100985	203	0.257596	0.988987	-0.993843
Pv2.1_04_11998940	Pv04	11998940	Pv2.1_04_11998940_C/A	C	A	0.145943	0.100985	203	0.257596	0.988987	-0.993843
Pv2.1_11_53452065	Pv011	53452065	Pv2.1_11_53452065_G/A	G	A	0.14596	0.118227	203	0.257595	0.988987	-1.07077
Pv2.1_11_53452081	Pv011	53452081	Pv2.1_11_53452081_G/A	G	A	0.14596	0.118227	203	0.257595	0.988987	-1.07077
Pv2.1_11_53476651	Pv011	53476651	Pv2.1_11_53476651_C/A	C	A	0.14596	0.118227	203	0.257595	0.988987	-1.07077
Pv2.1_11_53477650	Pv011	53477650	Pv2.1_11_53477650_A/G	A	G	0.14596	0.118227	203	0.257595	0.988987	-1.07077
Pv2.1_11_53480569	Pv011	53480569	Pv2.1_11_53480569_A/G	A	G	0.14596	0.118227	203	0.257595	0.988987	-1.07077
Pv2.1_11_53476650	Pv011	53476650	Pv2.1_11_53476650_A/G	A	G	0.14596	0.118227	203	0.257595	0.988987	1.07077
Pv2.1_11_53477633	Pv011	53477633	Pv2.1_11_53477633_T/C	T	C	0.14596	0.118227	203	0.257595	0.988987	1.07077
Pv2.1_02_23139187	Pv02	23139187	Pv2.1_02_23139187_A/G	A	G	0.146017	0.305419	203	0.257593	0.988987	0.753741
Pv2.1_09_36002031	Pv09	36002031	Pv2.1_09_36002031_A/C	A	C	0.14603	0.0418719	203	0.257592	0.988987	1.19581
Pv2.1_08_62553191	Pv08	62553191	Pv2.1_08_62553191_A/G	A	G	0.146306	0.0862069	203	0.257581	0.988987	1.40438
Pv2.1_08_62956295	Pv08	62956295	Pv2.1_08_62956295_A/G	A	G	0.146306	0.0862069	203	0.257581	0.988987	1.40438
Pv2.1_08_60451817	Pv08	60451817	Pv2.1_08_60451817_G/T	G	T	0.146362	0.0246305	203	0.257579	0.988987	-1.96865
Pv2.1_10_43597221	Pv010	43597221	Pv2.1_10_43597221_G/T	G	T	0.146381	0.403941	203	0.257578	0.988987	-0.577665
Pv2.1_10_43597223	Pv010	43597223	Pv2.1_10_43597223_T/C	T	C	0.146381	0.403941	203	0.257578	0.988987	-0.577665
Pv2.1_10_43597229	Pv010	43597229	Pv2.1_10_43597229_T/A	T	A	0.146381	0.403941	203	0.257578	0.988987	-0.577665
Pv2.1_10_43597348	Pv010	43597348	Pv2.1_10_43597348_G/A	G	A	0.146381	0.403941	203	0.257578	0.988987	-0.577665
Pv2.1_10_43600189	Pv010	43600189	Pv2.1_10_43600189_A/G	A	G	0.146381	0.403941	203	0.257578	0.988987	-0.577665
Pv2.1_03_36476317	Pv03	36476317	Pv2.1_03_36476317_C/G	C	G	0.146408	0.192118	203	0.257577	0.988987	0.827167
Pv2.1_03_37178890	Pv03	37178890	Pv2.1_03_37178890_T/G	T	G	0.146456	0.197044	203	0.257575	0.988987	-0.812135
Pv2.1_03_37133729	Pv03	37133729	Pv2.1_03_37133729_G/T	G	T	0.146456	0.197044	203	0.257575	0.988987	0.812135
Pv2.1_03_37170035	Pv03	37170035	Pv2.1_03_37170035_C/T	C	T	0.146456	0.197044	203	0.257575	0.988987	0.812135
Pv2.1_08_62212374	Pv08	62212374	Pv2.1_08_62212374_C/T	C	T	0.146492	0.169951	203	0.257574	0.988987	-0.941306
Pv2.1_02_44916256	Pv02	44916256	Pv2.1_02_44916256_C/T	C	T	0.146591	0.192118	203	0.25757	0.988987	0.796348
Pv2.1_11_52806866	Pv011	52806866	Pv2.1_11_52806866_T/C	T	C	0.146611	0.115764	203	0.257569	0.988987	-1.09372
Pv2.1_11_52974138	Pv011	52974138	Pv2.1_11_52974138_A/T	A	T	0.146611	0.115764	203	0.257569	0.988987	-1.09372
Pv2.1_11_52974160	Pv011	52974160	Pv2.1_11_52974160_T/G	T	G	0.146611	0.115764	203	0.257569	0.988987	-1.09372
Pv2.1_11_53133746	Pv011	53133746	Pv2.1_11_53133746_C/T	C	T	0.146611	0.115764	203	0.257569	0.988987	-1.09372
Pv2.1_02_23288656	Pv02	23288656	Pv2.1_02_23288656_C/G	C	G	0.146611	0.307882	203	0.257569	0.988987	0.75739
Pv2.1_02_23295338	Pv02	23295338	Pv2.1_02_23295338_A/G	A	G	0.146611	0.307882	203	0.257569	0.988987	0.75739
Pv2.1_09_38190897	Pv09	38190897	Pv2.1_09_38190897_C/T	C	T	0.146626	0.100985	203	0.257568	0.988987	1.2865
Pv2.1_08_62022086	Pv08	62022086	Pv2.1_08_62022086_G/A	G	A	0.146627	0.0689655	203	0.257568	0.988987	-1.35105
Pv2.1_08_62051805	Pv08	62051805	Pv2.1_08_62051805_C/T	C	T	0.146627	0.0689655	203	0.257568	0.988987	1.35105
Pv2.1_02_44916187	Pv02	44916187	Pv2.1_02_44916187_C/T	C	T	0.146672	0.194581	203	0.257566	0.988987	0.798884
Pv2.1_02_44916214	Pv02	44916214	Pv2.1_02_44916214_A/G	A	G	0.146672	0.194581	203	0.257566	0.988987	0.798884
Pv2.1_04_4239283	Pv04	4239283	Pv2.1_04_4239283_C/T	C	T	0.146798	0.216749	203	0.257561	0.988987	0.668233
Pv2.1_08_61248320	Pv08	61248320	Pv2.1_08_61248320_A/G	A	G	0.146826	0.0541872	203	0.25756	0.988987	1.35624
Pv2.1_08_61220819	Pv08	61220819	Pv2.1_08_61220819_G/T	G	T	0.146826	0.0541872	203	0.25756	0.988987	-1.35624
Pv2.1_02_44970269	Pv02	44970269	Pv2.1_02_44970269_C/A	C	A	0.146903	0.187192	203	0.257557	0.988987	0.77564
Pv2.1_02_44970271	Pv02	44970271	Pv2.1_02_44970271_C/A	C	A	0.146903	0.187192	203	0.257557	0.988987	0.77564
Pv2.1_10_10088742	Pv010	10088742	Pv2.1_10_10088742_A/G	A	G	0.147057	0.0862069	203	0.257551	0.988987	-0.975858
Pv2.1_03_36698698	Pv03	36698698	Pv2.1_03_36698698_A/T	A	T	0.147067	0.192118	203	0.257551	0.988987	0.846527
Pv2.1_03_36698712	Pv03	36698712	Pv2.1_03_36698712_C/G	C	G	0.147067	0.192118	203	0.257551	0.988987	0.846527
Pv2.1_03_36700500	Pv03	36700500	Pv2.1_03_36700500_G/A	G	A	0.147067	0.192118	203	0.257551	0.988987	0.846527
Pv2.1_03_36774136	Pv03	36774136	Pv2.1_03_36774136_G/A	G	A	0.147067	0.192118	203	0.257551	0.988987	0.846527
Pv2.1_02_39973281	Pv02	39973281	Pv2.1_02_39973281_C/A	C	A	0.147093	0.091133	203	0.257549	0.988987	-1.02454
Pv2.1_03_2589318	Pv03	2589318	Pv2.1_03_2589318_G/C	G	C	0.147101	0.110837	203	0.257549	0.988987	-0.985857
Pv2.1_03_36213111	Pv03	36213111	Pv2.1_03_36213111_A/C	A	C	0.147119	0.0295567	203	0.257548	0.988987	1.49466
Pv2.1_08_2720416	Pv08	2720416	Pv2.1_08_2720416_T/G	T	G	0.147132	0.35468	203	0.257548	0.988987	0.633244
Pv2.1_08_2726775	Pv08	2726775	Pv2.1_08_2726775_A/T	A	T	0.147132	0.35468	203	0.257548	0.988987	-0.633244
Pv2.1_05_37991577	Pv05	37991577	Pv2.1_05_37991577_A/G	A	G	0.1473	0.347291	203	0.257541	0.988987	0.683145
Pv2.1_10_41403581	Pv010	41403581	Pv2.1_10_41403581_A/T	A	T	0.147503	0.403941	203	0.257533	0.988987	-0.568423
Pv2.1_02_44927856	Pv02	44927856	Pv2.1_02_44927856_C/A	C	A	0.147507	0.192118	203	0.257533	0.988987	0.774182
Pv2.1_07_36691073	Pv07	36691073	Pv2.1_07_36691073_G/A	G	A	0.147525	0.448276	203	0.257532	0.988987	-0.779418
Pv2.1_10_6187495	Pv010	6187495	Pv2.1_10_6187495_A/C	A	C	0.147579	0.44335	203	0.25753	0.988987	0.73733
Pv2.1_02_1650155	Pv02	1650155	Pv2.1_02_1650155_T/C	T	C	0.147632	0.330049	203	0.257528	0.988987	-0.620435
Pv2.1_07_414782	Pv07	414782	Pv2.1_07_414782_A/C	A	C	0.147921	0.1133	203	0.257516	0.988987	1.0242
Pv2.1_07_369486	Pv07	369486	Pv2.1_07_369486_C/T	C	T	0.147921	0.1133	203	0.257516	0.988987	-1.0242
Pv2.1_07_396796	Pv07	396796	Pv2.1_07_396796_A/G	A	G	0.147921	0.1133	203	0.257516	0.988987	-1.0242
Pv2.1_06_19550547	Pv06	19550547	Pv2.1_06_19550547_G/C	G	C	0.147922	0.381773	203	0.257516	0.988987	-1.01137
Pv2.1_04_27704649	Pv04	27704649	Pv2.1_04_27704649_G/A	G	A	0.148251	0.472906	203	0.257503	0.988987	-0.540338
Pv2.1_11_30410409	Pv011	30410409	Pv2.1_11_30410409_G/A	G	A	0.148259	0.399015	203	0.257503	0.988987	-0.626352
Pv2.1_11_30410419	Pv011	30410419	Pv2.1_11_30410419_G/A	G	A	0.148259	0.399015	203	0.257503	0.988987	-0.626352
Pv2.1_06_19553648	Pv06	19553648	Pv2.1_06_19553648_A/T	A	T	0.148348	0.236453	203	0.257499	0.988987	-1.25348
Pv2.1_06_19461468	Pv06	19461468	Pv2.1_06_19461468_T/A	T	A	0.148348	0.236453	203	0.257499	0.988987	1.25348
Pv2.1_06_19542427	Pv06	19542427	Pv2.1_06_19542427_T/A	T	A	0.148348	0.236453	203	0.257499	0.988987	1.25348
Pv2.1_03_1214945	Pv03	1214945	Pv2.1_03_1214945_C/A	C	A	0.148575	0.150246	203	0.25749	0.988987	-0.751565
Pv2.1_03_1214989	Pv03	1214989	Pv2.1_03_1214989_A/G	A	G	0.148575	0.150246	203	0.25749	0.988987	-0.751565
Pv2.1_09_31572883	Pv09	31572883	Pv2.1_09_31572883_A/T	A	T	0.148736	0.35468	203	0.257484	0.988987	0.538087
[truncated: 15,655 more rows]

## Sheet: VEF
Marker	Chromosome	Position	Marker ID	Reference allele	Alternative allele	p value	MAF	n	R2	FDR Adjusted p values	Effect
Pv2.1_03_51024158	Pv03	51024158	Pv2.1_03_51024158_C/A	C	A	3.66311e-07	0.0484848	330	0.19551	0.00345065	-5.24055
Pv2.1_03_51024185	Pv03	51024185	Pv2.1_03_51024185_T/A	T	A	1.11781e-06	0.0469697	330	0.189234	0.00526491	-5.02635
Pv2.1_03_50922819	Pv03	50922819	Pv2.1_03_50922819_A/G	A	G	2.46904e-06	0.0454545	330	0.184813	0.0077528	4.82517
Pv2.1_10_41669244	Pv010	41669244	Pv2.1_10_41669244_A/C	A	C	3.93237e-05	0.201515	330	0.16963	0.0885847	2.79848
Pv2.1_03_46044043	Pv03	46044043	Pv2.1_03_46044043_A/G	A	G	4.70195e-05	0.113636	330	0.168664	0.0885847	3.91349
Pv2.1_03_50253853	Pv03	50253853	Pv2.1_03_50253853_G/C	G	C	0.000108812	0.0606061	330	0.164159	0.170835	-4.04709
Pv2.1_01_48916175	Pv01	48916175	Pv2.1_01_48916175_C/T	C	T	0.00048645	0.130303	330	0.156235	0.550586	-2.61757
Pv2.1_05_11499654	Pv05	11499654	Pv2.1_05_11499654_G/A	G	A	0.000516466	0.133333	330	0.155922	0.550586	3.01915
Pv2.1_03_45802317	Pv03	45802317	Pv2.1_03_45802317_C/T	C	T	0.000592796	0.157576	330	0.155202	0.550586	-2.87061
Pv2.1_03_50950974	Pv03	50950974	Pv2.1_03_50950974_C/G	C	G	0.000687031	0.0484848	330	0.154432	0.550586	3.62661
Pv2.1_07_4323937	Pv07	4323937	Pv2.1_07_4323937_C/G	C	G	0.000745695	0.0484848	330	0.154006	0.550586	3.54981
Pv2.1_03_46079394	Pv03	46079394	Pv2.1_03_46079394_C/G	C	G	0.000793189	0.0515152	330	0.153685	0.550586	3.35234
Pv2.1_02_43593314	Pv02	43593314	Pv2.1_02_43593314_C/G	C	G	0.000818281	0.248485	330	0.153523	0.550586	-2.5423
Pv2.1_02_43593322	Pv02	43593322	Pv2.1_02_43593322_C/T	C	T	0.000818281	0.248485	330	0.153523	0.550586	-2.5423
Pv2.1_03_50511351	Pv03	50511351	Pv2.1_03_50511351_A/C	A	C	0.000949215	0.127273	330	0.152753	0.569582	3.21554
Pv2.1_10_39915977	Pv010	39915977	Pv2.1_10_39915977_A/G	A	G	0.000967443	0.322727	330	0.152655	0.569582	-2.13321
Pv2.1_07_4174943	Pv07	4174943	Pv2.1_07_4174943_T/C	T	C	0.00106808	0.492424	330	0.152143	0.57491	1.78234
Pv2.1_11_1248671	Pv011	1248671	Pv2.1_11_1248671_G/A	G	A	0.00109855	0.110606	330	0.151997	0.57491	2.7527
Pv2.1_03_51055541	Pv03	51055541	Pv2.1_03_51055541_A/G	A	G	0.00125799	0.142424	330	0.151298	0.577526	2.67622
Pv2.1_03_51562550	Pv03	51562550	Pv2.1_03_51562550_T/G	T	G	0.00131937	0.113636	330	0.151052	0.577526	-2.64222
Pv2.1_10_41669263	Pv010	41669263	Pv2.1_10_41669263_T/G	T	G	0.00134388	0.216667	330	0.150958	0.577526	-2.16023
Pv2.1_03_51644134	Pv03	51644134	Pv2.1_03_51644134_A/G	A	G	0.00138446	0.198485	330	0.150804	0.577526	2.09835
Pv2.1_07_3988990	Pv07	3988990	Pv2.1_07_3988990_G/A	G	A	0.00147398	0.472727	330	0.150482	0.577526	1.83662
Pv2.1_03_51055568	Pv03	51055568	Pv2.1_03_51055568_A/G	A	G	0.0015282	0.142424	330	0.150296	0.577526	2.62676
Pv2.1_03_50758415	Pv03	50758415	Pv2.1_03_50758415_G/C	G	C	0.00159175	0.0878788	330	0.150087	0.577526	-2.95682
Pv2.1_03_2637448	Pv03	2637448	Pv2.1_03_2637448_A/C	A	C	0.00159402	0.175758	330	0.15008	0.577526	2.45043
Pv2.1_07_39799922	Pv07	39799922	Pv2.1_07_39799922_G/C	G	C	0.00171191	0.116667	330	0.149714	0.597266	-2.22993
Pv2.1_08_59990672	Pv08	59990672	Pv2.1_08_59990672_G/T	G	T	0.00179994	0.0787879	330	0.149457	0.60555	3.02967
Pv2.1_03_46077301	Pv03	46077301	Pv2.1_03_46077301_A/G	A	G	0.00217217	0.05	330	0.148496	0.65469	3.05341
Pv2.1_07_5387112	Pv07	5387112	Pv2.1_07_5387112_T/A	T	A	0.00220755	0.106061	330	0.148414	0.65469	-2.90928
Pv2.1_10_42966116	Pv010	42966116	Pv2.1_10_42966116_T/C	T	C	0.00223256	0.2	330	0.148356	0.65469	2.48977
Pv2.1_03_50075271	Pv03	50075271	Pv2.1_03_50075271_A/T	A	T	0.00232938	0.0424242	330	0.14814	0.65469	3.47747
Pv2.1_03_41906948	Pv03	41906948	Pv2.1_03_41906948_G/C	G	C	0.00235515	0.315152	330	0.148084	0.65469	-1.74914
Pv2.1_03_51917265	Pv03	51917265	Pv2.1_03_51917265_G/T	G	T	0.002363	0.106061	330	0.148067	0.65469	2.45549
Pv2.1_08_2094560	Pv08	2094560	Pv2.1_08_2094560_T/C	T	C	0.00277752	0.15	330	0.147245	0.714972	2.21851
Pv2.1_03_50347987	Pv03	50347987	Pv2.1_03_50347987_T/C	T	C	0.00301706	0.0606061	330	0.146825	0.714972	-3.25866
Pv2.1_04_43943487	Pv04	43943487	Pv2.1_04_43943487_T/C	T	C	0.00302855	0.240909	330	0.146806	0.714972	2.01806
Pv2.1_03_51614235	Pv03	51614235	Pv2.1_03_51614235_T/C	T	C	0.00325635	0.254545	330	0.146439	0.714972	-1.87978
Pv2.1_07_1175424	Pv07	1175424	Pv2.1_07_1175424_G/C	G	C	0.00337131	0.10303	330	0.146263	0.714972	3.09176
Pv2.1_10_42465992	Pv010	42465992	Pv2.1_10_42465992_G/C	G	C	0.00342794	0.151515	330	0.146179	0.714972	2.23834
Pv2.1_02_43452150	Pv02	43452150	Pv2.1_02_43452150_A/C	A	C	0.00345032	0.307576	330	0.146146	0.714972	-2.20445
Pv2.1_07_3930260	Pv07	3930260	Pv2.1_07_3930260_T/C	T	C	0.00358338	0.474242	330	0.145955	0.714972	1.68755
Pv2.1_03_51614160	Pv03	51614160	Pv2.1_03_51614160_C/A	C	A	0.00362199	0.206061	330	0.145901	0.714972	-1.87784
Pv2.1_02_24908423	Pv02	24908423	Pv2.1_02_24908423_A/T	A	T	0.00380185	0.0954545	330	0.145656	0.714972	2.40271
Pv2.1_02_47600690	Pv02	47600690	Pv2.1_02_47600690_G/A	G	A	0.00390295	0.163636	330	0.145524	0.714972	-2.08668
Pv2.1_08_59632598	Pv08	59632598	Pv2.1_08_59632598_T/A	T	A	0.00400816	0.121212	330	0.14539	0.714972	-2.57525
Pv2.1_03_46079384	Pv03	46079384	Pv2.1_03_46079384_T/C	T	C	0.00400953	0.0560606	330	0.145388	0.714972	-2.86562
Pv2.1_03_53339294	Pv03	53339294	Pv2.1_03_53339294_T/G	T	G	0.00404175	0.175758	330	0.145348	0.714972	2.05091
Pv2.1_01_48981803	Pv01	48981803	Pv2.1_01_48981803_G/T	G	T	0.00418906	0.101515	330	0.145168	0.714972	2.55503
Pv2.1_11_48930355	Pv011	48930355	Pv2.1_11_48930355_A/G	A	G	0.00423262	0.172727	330	0.145116	0.714972	2.3829
Pv2.1_10_43391440	Pv010	43391440	Pv2.1_10_43391440_A/G	A	G	0.00424669	0.0530303	330	0.145099	0.714972	-2.6502
Pv2.1_03_2696917	Pv03	2696917	Pv2.1_03_2696917_A/G	A	G	0.00482521	0.1	330	0.144458	0.714972	2.63753
Pv2.1_03_50652908	Pv03	50652908	Pv2.1_03_50652908_A/C	A	C	0.00483862	0.0378788	330	0.144444	0.714972	3.13099
Pv2.1_08_60032085	Pv08	60032085	Pv2.1_08_60032085_T/C	T	C	0.00487622	0.0833333	330	0.144405	0.714972	-2.81689
Pv2.1_01_6291972	Pv01	6291972	Pv2.1_01_6291972_T/C	T	C	0.0048821	0.128788	330	0.144399	0.714972	-2.37333
Pv2.1_10_41656724	Pv010	41656724	Pv2.1_10_41656724_T/C	T	C	0.00489666	0.240909	330	0.144384	0.714972	-1.97117
Pv2.1_03_50504311	Pv03	50504311	Pv2.1_03_50504311_C/T	C	T	0.00493163	0.0530303	330	0.144348	0.714972	3.08693
Pv2.1_02_43873906	Pv02	43873906	Pv2.1_02_43873906_G/A	G	A	0.00494455	0.186364	330	0.144335	0.714972	2.47931
Pv2.1_02_43371246	Pv02	43371246	Pv2.1_02_43371246_T/A	T	A	0.00504325	0.184848	330	0.144236	0.714972	2.45594
Pv2.1_07_30053416	Pv07	30053416	Pv2.1_07_30053416_C/G	C	G	0.0050501	0.0909091	330	0.144229	0.714972	-2.57868
Pv2.1_07_26125236	Pv07	26125236	Pv2.1_07_26125236_C/G	C	G	0.00509615	0.0454545	330	0.144184	0.714972	-3.24205
Pv2.1_02_47746418	Pv02	47746418	Pv2.1_02_47746418_G/A	G	A	0.00511006	0.207576	330	0.14417	0.714972	-1.67509
Pv2.1_10_39796998	Pv010	39796998	Pv2.1_10_39796998_G/C	G	C	0.00521771	0.301515	330	0.144066	0.714972	1.89228
Pv2.1_04_45285294	Pv04	45285294	Pv2.1_04_45285294_A/G	A	G	0.00524297	0.15	330	0.144042	0.714972	-2.87206
Pv2.1_04_45285347	Pv04	45285347	Pv2.1_04_45285347_C/T	C	T	0.00524297	0.15	330	0.144042	0.714972	-2.87206
Pv2.1_04_44784965	Pv04	44784965	Pv2.1_04_44784965_T/C	T	C	0.00525025	0.265152	330	0.144035	0.714972	-2.00288
Pv2.1_04_42485735	Pv04	42485735	Pv2.1_04_42485735_G/T	G	T	0.00536599	0.263636	330	0.143926	0.714972	2.29419
Pv2.1_03_4864980	Pv03	4864980	Pv2.1_03_4864980_T/C	T	C	0.00543974	0.0969697	330	0.143858	0.714972	2.53024
Pv2.1_05_7576911	Pv05	7576911	Pv2.1_05_7576911_G/C	G	C	0.00544382	0.0590909	330	0.143854	0.714972	3.24918
Pv2.1_03_51679931	Pv03	51679931	Pv2.1_03_51679931_C/A	C	A	0.00550497	0.231818	330	0.143798	0.714972	-1.99429
Pv2.1_06_19995613	Pv06	19995613	Pv2.1_06_19995613_C/G	C	G	0.00561013	0.268182	330	0.143703	0.714972	-1.3136
Pv2.1_10_39781424	Pv010	39781424	Pv2.1_10_39781424_C/G	C	G	0.00564481	0.321212	330	0.143673	0.714972	-1.85956
Pv2.1_05_7576963	Pv05	7576963	Pv2.1_05_7576963_T/C	T	C	0.00565767	0.0621212	330	0.143661	0.714972	3.07814
Pv2.1_03_51024179	Pv03	51024179	Pv2.1_03_51024179_T/G	T	G	0.00568469	0.183333	330	0.143637	0.714972	2.0694
Pv2.1_09_10194115	Pv09	10194115	Pv2.1_09_10194115_A/G	A	G	0.00574503	0.0348485	330	0.143585	0.714972	3.6659
Pv2.1_01_45613557	Pv01	45613557	Pv2.1_01_45613557_A/G	A	G	0.00576835	0.0469697	330	0.143565	0.714972	-3.83289
Pv2.1_02_43624193	Pv02	43624193	Pv2.1_02_43624193_T/C	T	C	0.00594485	0.187879	330	0.143414	0.716425	2.67412
Pv2.1_02_43624173	Pv02	43624173	Pv2.1_02_43624173_G/T	G	T	0.00594485	0.187879	330	0.143414	0.716425	-2.67412
Pv2.1_10_41875901	Pv010	41875901	Pv2.1_10_41875901_C/T	C	T	0.00606175	0.174242	330	0.143317	0.716425	1.96194
Pv2.1_10_43423980	Pv010	43423980	Pv2.1_10_43423980_A/G	A	G	0.00608429	0.0772727	330	0.143299	0.716425	-2.72593
Pv2.1_07_501653	Pv07	501653	Pv2.1_07_501653_G/T	G	T	0.00621869	0.0969697	330	0.14319	0.723211	-2.54728
Pv2.1_04_43467751	Pv04	43467751	Pv2.1_04_43467751_C/G	C	G	0.00640943	0.162121	330	0.143039	0.736303	2.27601
Pv2.1_03_42226387	Pv03	42226387	Pv2.1_03_42226387_A/C	A	C	0.00662305	0.0712121	330	0.142876	0.741367	2.36047
Pv2.1_07_689013	Pv07	689013	Pv2.1_07_689013_T/G	T	G	0.00664883	0.162121	330	0.142857	0.741367	2.52521
Pv2.1_10_43423921	Pv010	43423921	Pv2.1_10_43423921_T/C	T	C	0.00680106	0.0363636	330	0.142744	0.741367	3.29936
Pv2.1_10_43423937	Pv010	43423937	Pv2.1_10_43423937_G/T	G	T	0.00680106	0.0363636	330	0.142744	0.741367	-3.29936
Pv2.1_02_43538900	Pv02	43538900	Pv2.1_02_43538900_A/G	A	G	0.00689061	0.195455	330	0.142679	0.741367	-2.66652
Pv2.1_03_2494267	Pv03	2494267	Pv2.1_03_2494267_A/G	A	G	0.00704145	0.136364	330	0.142572	0.741367	2.17781
Pv2.1_03_50694006	Pv03	50694006	Pv2.1_03_50694006_A/G	A	G	0.0070717	0.0560606	330	0.14255	0.741367	2.78499
Pv2.1_02_43439327	Pv02	43439327	Pv2.1_02_43439327_C/T	C	T	0.00708312	0.207576	330	0.142542	0.741367	-2.33583
Pv2.1_02_43631503	Pv02	43631503	Pv2.1_02_43631503_T/A	T	A	0.00727607	0.198485	330	0.142409	0.749885	2.42085
Pv2.1_02_43631456	Pv02	43631456	Pv2.1_02_43631456_G/A	G	A	0.00732372	0.189394	330	0.142377	0.749885	2.43863
Pv2.1_02_25074133	Pv02	25074133	Pv2.1_02_25074133_C/A	C	A	0.00747414	0.139394	330	0.142276	0.750041	-1.94211
Pv2.1_03_45923669	Pv03	45923669	Pv2.1_03_45923669_C/T	C	T	0.00756411	0.0424242	330	0.142216	0.750041	3.01373
Pv2.1_03_45923661	Pv03	45923661	Pv2.1_03_45923661_G/A	G	A	0.00756411	0.0424242	330	0.142216	0.750041	-3.01373
Pv2.1_03_46474018	Pv03	46474018	Pv2.1_03_46474018_T/G	T	G	0.00773425	0.0333333	330	0.142106	0.755068	-2.93931
Pv2.1_07_4323931	Pv07	4323931	Pv2.1_07_4323931_A/G	A	G	0.00777512	0.119697	330	0.14208	0.755068	2.45842
Pv2.1_03_31498241	Pv03	31498241	Pv2.1_03_31498241_G/A	G	A	0.00789977	0.116667	330	0.142001	0.759346	2.3468
Pv2.1_08_59255852	Pv08	59255852	Pv2.1_08_59255852_A/T	A	T	0.0080864	0.131818	330	0.141886	0.762894	1.8266
Pv2.1_04_4238697	Pv04	4238697	Pv2.1_04_4238697_A/G	A	G	0.00809866	0.115152	330	0.141878	0.762894	2.59659
Pv2.1_01_48981798	Pv01	48981798	Pv2.1_01_48981798_A/G	A	G	0.00841159	0.101515	330	0.141691	0.784526	2.31767
Pv2.1_03_50758404	Pv03	50758404	Pv2.1_03_50758404_A/T	A	T	0.00879237	0.0939394	330	0.141472	0.801817	2.34409
Pv2.1_03_3443426	Pv03	3443426	Pv2.1_03_3443426_A/C	A	C	0.00886428	0.272727	330	0.141432	0.801817	-1.74984
Pv2.1_01_46588061	Pv01	46588061	Pv2.1_01_46588061_T/C	T	C	0.00895107	0.134848	330	0.141384	0.801817	2.33188
Pv2.1_09_37679730	Pv09	37679730	Pv2.1_09_37679730_A/T	A	T	0.00910297	0.139394	330	0.141301	0.801817	-2.21258
Pv2.1_02_2433863	Pv02	2433863	Pv2.1_02_2433863_G/A	G	A	0.00933426	0.163636	330	0.141177	0.801817	-2.57131
Pv2.1_10_41656741	Pv010	41656741	Pv2.1_10_41656741_T/C	T	C	0.00938151	0.239394	330	0.141153	0.801817	-1.82012
Pv2.1_02_19969775	Pv02	19969775	Pv2.1_02_19969775_G/C	G	C	0.00940561	0.0772727	330	0.14114	0.801817	2.60992
Pv2.1_02_24259556	Pv02	24259556	Pv2.1_02_24259556_G/A	G	A	0.00944384	0.0484848	330	0.14112	0.801817	3.24955
Pv2.1_05_4324924	Pv05	4324924	Pv2.1_05_4324924_G/A	G	A	0.00971467	0.0393939	330	0.140981	0.801817	-3.01925
Pv2.1_03_3443430	Pv03	3443430	Pv2.1_03_3443430_A/G	A	G	0.00974783	0.271212	330	0.140964	0.801817	-1.72953
Pv2.1_05_40577065	Pv05	40577065	Pv2.1_05_40577065_A/G	A	G	0.00976468	0.0424242	330	0.140956	0.801817	-2.63662
Pv2.1_02_43893201	Pv02	43893201	Pv2.1_02_43893201_T/C	T	C	0.00985014	0.224242	330	0.140913	0.801817	2.09636
Pv2.1_04_45285331	Pv04	45285331	Pv2.1_04_45285331_A/G	A	G	0.00985475	0.148485	330	0.14091	0.801817	2.64086
Pv2.1_03_50347949	Pv03	50347949	Pv2.1_03_50347949_G/A	G	A	0.00991583	0.0393939	330	0.14088	0.801817	-3.35272
Pv2.1_03_46813584	Pv03	46813584	Pv2.1_03_46813584_A/T	A	T	0.0100038	0.0742424	330	0.140837	0.801817	2.69324
Pv2.1_02_9353520	Pv02	9353520	Pv2.1_02_9353520_T/C	T	C	0.010073	0.206061	330	0.140803	0.801817	-2.09359
Pv2.1_05_28671874	Pv05	28671874	Pv2.1_05_28671874_C/T	C	T	0.0101991	0.069697	330	0.140742	0.801817	2.30471
Pv2.1_07_3930074	Pv07	3930074	Pv2.1_07_3930074_A/G	A	G	0.0102116	0.495455	330	0.140736	0.801817	-1.37009
Pv2.1_01_46599637	Pv01	46599637	Pv2.1_01_46599637_T/A	T	A	0.0102142	0.0621212	330	0.140734	0.801817	2.80403
Pv2.1_11_69203	Pv011	69203	Pv2.1_11_69203_A/C	A	C	0.0104746	0.131818	330	0.140611	0.811494	2.03352
Pv2.1_02_29139352	Pv02	29139352	Pv2.1_02_29139352_T/C	T	C	0.0105098	0.0378788	330	0.140594	0.811494	2.74241
Pv2.1_11_4980891	Pv011	4980891	Pv2.1_11_4980891_G/A	G	A	0.0106489	0.168182	330	0.14053	0.814688	-1.70948
Pv2.1_01_45613553	Pv01	45613553	Pv2.1_01_45613553_C/A	C	A	0.0108153	0.0454545	330	0.140454	0.814688	3.55166
Pv2.1_02_43444154	Pv02	43444154	Pv2.1_02_43444154_C/G	C	G	0.0108442	0.221212	330	0.140441	0.814688	-2.11597
Pv2.1_05_3739633	Pv05	3739633	Pv2.1_05_3739633_T/A	T	A	0.0108971	0.116667	330	0.140417	0.814688	-2.09115
Pv2.1_04_43913245	Pv04	43913245	Pv2.1_04_43913245_C/T	C	T	0.0111567	0.387879	330	0.140301	0.824112	-1.16314
Pv2.1_08_59709783	Pv08	59709783	Pv2.1_08_59709783_G/C	G	C	0.0113874	0.363636	330	0.140201	0.824112	-1.07768
Pv2.1_03_3443427	Pv03	3443427	Pv2.1_03_3443427_A/C	A	C	0.0114141	0.269697	330	0.14019	0.824112	-1.67493
Pv2.1_03_46145431	Pv03	46145431	Pv2.1_03_46145431_A/C	A	C	0.0115597	0.080303	330	0.140128	0.824112	-2.1924
Pv2.1_03_45923615	Pv03	45923615	Pv2.1_03_45923615_G/T	G	T	0.0117028	0.0393939	330	0.140067	0.824112	2.74667
Pv2.1_09_9635167	Pv09	9635167	Pv2.1_09_9635167_A/C	A	C	0.0118608	0.080303	330	0.140002	0.824112	2.53386
Pv2.1_02_43814961	Pv02	43814961	Pv2.1_02_43814961_C/G	C	G	0.0119447	0.190909	330	0.139967	0.824112	-2.36281
Pv2.1_10_40046111	Pv010	40046111	Pv2.1_10_40046111_A/G	A	G	0.0120118	0.298485	330	0.13994	0.824112	-1.60108
Pv2.1_02_43371238	Pv02	43371238	Pv2.1_02_43371238_C/T	C	T	0.0121595	0.15	330	0.13988	0.824112	-2.25131
Pv2.1_10_43150872	Pv010	43150872	Pv2.1_10_43150872_C/T	C	T	0.0122221	0.14697	330	0.139855	0.824112	-1.87507
Pv2.1_02_25058823	Pv02	25058823	Pv2.1_02_25058823_T/C	T	C	0.012234	0.142424	330	0.13985	0.824112	-1.97639
Pv2.1_09_32633784	Pv09	32633784	Pv2.1_09_32633784_G/T	G	T	0.0123719	0.151515	330	0.139796	0.824112	-2.23685
Pv2.1_02_32208160	Pv02	32208160	Pv2.1_02_32208160_T/A	T	A	0.0124267	0.116667	330	0.139774	0.824112	-2.38138
Pv2.1_02_32208152	Pv02	32208152	Pv2.1_02_32208152_G/C	G	C	0.0124553	0.109091	330	0.139763	0.824112	-2.45621
Pv2.1_02_43529895	Pv02	43529895	Pv2.1_02_43529895_C/A	C	A	0.0124643	0.193939	330	0.139759	0.824112	2.32208
Pv2.1_02_45454883	Pv02	45454883	Pv2.1_02_45454883_A/G	A	G	0.0125419	0.0560606	330	0.139729	0.824112	-2.50078
Pv2.1_04_44863463	Pv04	44863463	Pv2.1_04_44863463_C/T	C	T	0.0126054	0.0272727	330	0.139704	0.824112	3.37332
Pv2.1_02_48755405	Pv02	48755405	Pv2.1_02_48755405_T/C	T	C	0.012651	0.319697	330	0.139687	0.824112	1.47709
Pv2.1_02_11491538	Pv02	11491538	Pv2.1_02_11491538_C/T	C	T	0.0127064	0.116667	330	0.139665	0.824112	-2.05283
Pv2.1_03_50916058	Pv03	50916058	Pv2.1_03_50916058_A/G	A	G	0.0127729	0.166667	330	0.13964	0.824112	-1.96933
Pv2.1_03_42575673	Pv03	42575673	Pv2.1_03_42575673_T/C	T	C	0.0130117	0.115152	330	0.13955	0.833813	-1.99215
Pv2.1_03_45773966	Pv03	45773966	Pv2.1_03_45773966_T/A	T	A	0.0131784	0.0575758	330	0.139488	0.838785	-2.30227
Pv2.1_05_1463950	Pv05	1463950	Pv2.1_05_1463950_T/C	T	C	0.0134668	0.190909	330	0.139382	0.848389	1.75222
Pv2.1_11_5002346	Pv011	5002346	Pv2.1_11_5002346_A/T	A	T	0.0135286	0.187879	330	0.13936	0.848389	-1.7372
Pv2.1_04_152399	Pv04	152399	Pv2.1_04_152399_T/C	T	C	0.0136792	0.165152	330	0.139306	0.848389	1.65367
Pv2.1_02_44257830	Pv02	44257830	Pv2.1_02_44257830_T/C	T	C	0.0136895	0.186364	330	0.139302	0.848389	2.05932
Pv2.1_02_38698705	Pv02	38698705	Pv2.1_02_38698705_A/T	A	T	0.0138513	0.371212	330	0.139245	0.852734	-1.23295
Pv2.1_03_40856601	Pv03	40856601	Pv2.1_03_40856601_G/T	G	T	0.0140103	0.163636	330	0.13919	0.852734	-1.67222
Pv2.1_06_19994712	Pv06	19994712	Pv2.1_06_19994712_G/A	G	A	0.0141748	0.271212	330	0.139133	0.852734	1.26323
Pv2.1_03_52015879	Pv03	52015879	Pv2.1_03_52015879_C/T	C	T	0.0141751	0.106061	330	0.139133	0.852734	2.033
Pv2.1_02_49171249	Pv02	49171249	Pv2.1_02_49171249_C/A	C	A	0.0143018	0.257576	330	0.13909	0.852734	-1.63004
Pv2.1_02_43814962	Pv02	43814962	Pv2.1_02_43814962_C/A	C	A	0.0143028	0.189394	330	0.139089	0.852734	2.27301
Pv2.1_02_21012410	Pv02	21012410	Pv2.1_02_21012410_G/A	G	A	0.014486	0.136364	330	0.139027	0.855728	2.0551
Pv2.1_11_1248669	Pv011	1248669	Pv2.1_11_1248669_A/C	A	C	0.0145347	0.145455	330	0.139011	0.855728	-1.79314
Pv2.1_10_43254544	Pv010	43254544	Pv2.1_10_43254544_T/G	T	G	0.0147395	0.0469697	330	0.138943	0.860031	2.44134
Pv2.1_03_36783533	Pv03	36783533	Pv2.1_03_36783533_A/G	A	G	0.0151147	0.05	330	0.138821	0.860031	-2.5676
Pv2.1_04_43299423	Pv04	43299423	Pv2.1_04_43299423_C/T	C	T	0.0151518	0.193939	330	0.138809	0.860031	2.47715
Pv2.1_02_44479431	Pv02	44479431	Pv2.1_02_44479431_T/C	T	C	0.0151626	0.180303	330	0.138806	0.860031	2.26829
Pv2.1_03_4862042	Pv03	4862042	Pv2.1_03_4862042_G/A	G	A	0.0151641	0.0530303	330	0.138805	0.860031	2.62585
Pv2.1_04_152402	Pv04	152402	Pv2.1_04_152402_C/T	C	T	0.0151674	0.165152	330	0.138804	0.860031	-1.63896
Pv2.1_03_41553476	Pv03	41553476	Pv2.1_03_41553476_A/C	A	C	0.0153787	0.127273	330	0.138737	0.860031	-2.07979
Pv2.1_04_46979224	Pv04	46979224	Pv2.1_04_46979224_T/A	T	A	0.0154311	0.219697	330	0.138721	0.860031	-1.51815
Pv2.1_02_21012452	Pv02	21012452	Pv2.1_02_21012452_T/C	T	C	0.0154452	0.137879	330	0.138716	0.860031	2.08029
Pv2.1_04_541489	Pv04	541489	Pv2.1_04_541489_A/G	A	G	0.0155207	0.222727	330	0.138693	0.860031	1.70878
Pv2.1_06_21533326	Pv06	21533326	Pv2.1_06_21533326_A/C	A	C	0.0156284	0.224242	330	0.138659	0.860935	1.13633
Pv2.1_09_7380931	Pv09	7380931	Pv2.1_09_7380931_G/C	G	C	0.015808	0.0909091	330	0.138604	0.865766	1.96913
Pv2.1_10_39859797	Pv010	39859797	Pv2.1_10_39859797_C/T	C	T	0.0160773	0.301515	330	0.138522	0.867919	-1.5802
Pv2.1_10_39965157	Pv010	39965157	Pv2.1_10_39965157_G/T	G	T	0.0160791	0.304545	330	0.138522	0.867919	-1.59473
Pv2.1_02_47302484	Pv02	47302484	Pv2.1_02_47302484_T/C	T	C	0.0163126	0.0590909	330	0.138452	0.867919	-2.45992
Pv2.1_03_42222242	Pv03	42222242	Pv2.1_03_42222242_A/C	A	C	0.016349	0.0893939	330	0.138441	0.867919	1.95852
Pv2.1_02_43814964	Pv02	43814964	Pv2.1_02_43814964_C/T	C	T	0.0163851	0.192424	330	0.13843	0.867919	-2.20097
Pv2.1_07_2458984	Pv07	2458984	Pv2.1_07_2458984_C/A	C	A	0.0164048	0.248485	330	0.138425	0.867919	1.79918
Pv2.1_04_46846465	Pv04	46846465	Pv2.1_04_46846465_T/C	T	C	0.0164923	0.0984848	330	0.138399	0.867919	-1.93254
Pv2.1_02_46291098	Pv02	46291098	Pv2.1_02_46291098_A/C	A	C	0.0166552	0.436364	330	0.138351	0.870305	1.14923
Pv2.1_05_4402547	Pv05	4402547	Pv2.1_05_4402547_C/T	C	T	0.0167224	0.0515152	330	0.138332	0.870305	2.42559
Pv2.1_03_40571103	Pv03	40571103	Pv2.1_03_40571103_A/G	A	G	0.0168462	0.275758	330	0.138296	0.871931	-1.54766
Pv2.1_02_43452027	Pv02	43452027	Pv2.1_02_43452027_A/T	A	T	0.017064	0.190909	330	0.138234	0.877721	-2.16245
Pv2.1_02_24785301	Pv02	24785301	Pv2.1_02_24785301_A/G	A	G	0.0171444	0.0818182	330	0.138211	0.877721	2.31347
Pv2.1_07_1026775	Pv07	1026775	Pv2.1_07_1026775_G/T	G	T	0.0172755	0.0712121	330	0.138175	0.877939	-2.5217
Pv2.1_01_50086333	Pv01	50086333	Pv2.1_01_50086333_A/G	A	G	0.0173351	0.230303	330	0.138158	0.877939	1.67658
Pv2.1_08_60199606	Pv08	60199606	Pv2.1_08_60199606_G/A	G	A	0.0176362	0.119697	330	0.138075	0.8803	-2.10172
Pv2.1_07_689000	Pv07	689000	Pv2.1_07_689000_A/G	A	G	0.0177282	0.163636	330	0.13805	0.8803	-2.31839
Pv2.1_11_42263960	Pv011	42263960	Pv2.1_11_42263960_G/A	G	A	0.0178149	0.069697	330	0.138026	0.8803	2.13782
Pv2.1_07_28996934	Pv07	28996934	Pv2.1_07_28996934_T/C	T	C	0.0181206	0.0484848	330	0.137944	0.8803	-2.75047
Pv2.1_05_1463930	Pv05	1463930	Pv2.1_05_1463930_C/T	C	T	0.0182179	0.189394	330	0.137919	0.8803	-1.69573
Pv2.1_03_50726942	Pv03	50726942	Pv2.1_03_50726942_T/C	T	C	0.018415	0.0333333	330	0.137867	0.8803	-2.70881
Pv2.1_05_11499617	Pv05	11499617	Pv2.1_05_11499617_G/T	G	T	0.0185809	0.0787879	330	0.137824	0.8803	-2.51597
Pv2.1_01_5561979	Pv01	5561979	Pv2.1_01_5561979_C/T	C	T	0.0186917	0.143939	330	0.137795	0.8803	1.38763
Pv2.1_09_37770553	Pv09	37770553	Pv2.1_09_37770553_A/G	A	G	0.0188823	0.0515152	330	0.137746	0.8803	-2.29002
Pv2.1_03_45938773	Pv03	45938773	Pv2.1_03_45938773_G/C	G	C	0.0193362	0.0954545	330	0.137632	0.8803	1.8975
Pv2.1_02_4007896	Pv02	4007896	Pv2.1_02_4007896_C/G	C	G	0.0194317	0.0924242	330	0.137608	0.8803	1.99676
Pv2.1_03_51003698	Pv03	51003698	Pv2.1_03_51003698_T/C	T	C	0.0195946	0.207576	330	0.137568	0.8803	1.6564
Pv2.1_03_51003699	Pv03	51003699	Pv2.1_03_51003699_C/A	C	A	0.0195946	0.207576	330	0.137568	0.8803	1.6564
Pv2.1_01_7162625	Pv01	7162625	Pv2.1_01_7162625_G/T	G	T	0.0195958	0.192424	330	0.137568	0.8803	-1.37312
Pv2.1_02_24370687	Pv02	24370687	Pv2.1_02_24370687_T/C	T	C	0.0196924	0.0712121	330	0.137544	0.8803	2.37036
Pv2.1_04_45326975	Pv04	45326975	Pv2.1_04_45326975_C/T	C	T	0.019717	0.0439394	330	0.137538	0.8803	2.57619
Pv2.1_10_41859037	Pv010	41859037	Pv2.1_10_41859037_C/A	C	A	0.0198091	0.29697	330	0.137516	0.8803	1.44498
Pv2.1_01_45613558	Pv01	45613558	Pv2.1_01_45613558_T/C	T	C	0.0199412	0.0469697	330	0.137484	0.8803	3.11266
Pv2.1_03_3443442	Pv03	3443442	Pv2.1_03_3443442_G/C	G	C	0.0200101	0.290909	330	0.137467	0.8803	1.57653
Pv2.1_03_3443462	Pv03	3443462	Pv2.1_03_3443462_A/G	A	G	0.0200101	0.290909	330	0.137467	0.8803	-1.57653
Pv2.1_03_41652327	Pv03	41652327	Pv2.1_03_41652327_C/T	C	T	0.0200948	0.292424	330	0.137447	0.8803	-1.41435
Pv2.1_06_24989373	Pv06	24989373	Pv2.1_06_24989373_A/C	A	C	0.0201228	0.180303	330	0.137441	0.8803	1.86576
Pv2.1_11_31391560	Pv011	31391560	Pv2.1_11_31391560_G/T	G	T	0.0202236	0.151515	330	0.137417	0.8803	1.4336
Pv2.1_05_11701521	Pv05	11701521	Pv2.1_05_11701521_G/A	G	A	0.0203307	0.183333	330	0.137391	0.8803	1.51406
Pv2.1_08_62807833	Pv08	62807833	Pv2.1_08_62807833_C/T	C	T	0.0204252	0.187879	330	0.137369	0.8803	1.39954
Pv2.1_01_45880732	Pv01	45880732	Pv2.1_01_45880732_A/G	A	G	0.0204943	0.0651515	330	0.137353	0.8803	-2.87511
Pv2.1_04_45526976	Pv04	45526976	Pv2.1_04_45526976_T/C	T	C	0.0205018	0.139394	330	0.137351	0.8803	-1.99467
Pv2.1_02_43436853	Pv02	43436853	Pv2.1_02_43436853_A/G	A	G	0.0206475	0.193939	330	0.137317	0.8803	-2.09914
Pv2.1_07_3497903	Pv07	3497903	Pv2.1_07_3497903_T/C	T	C	0.0207303	0.225758	330	0.137298	0.8803	1.61649
Pv2.1_03_41653200	Pv03	41653200	Pv2.1_03_41653200_G/T	G	T	0.0207446	0.30303	330	0.137295	0.8803	-1.45132
Pv2.1_04_43467711	Pv04	43467711	Pv2.1_04_43467711_T/G	T	G	0.0208617	0.142424	330	0.137268	0.8803	2.24008
Pv2.1_10_39526904	Pv010	39526904	Pv2.1_10_39526904_T/A	T	A	0.0209265	0.359091	330	0.137253	0.8803	1.29399
Pv2.1_04_152387	Pv04	152387	Pv2.1_04_152387_C/G	C	G	0.0210911	0.172727	330	0.137215	0.8803	-1.50739
Pv2.1_08_61844370	Pv08	61844370	Pv2.1_08_61844370_A/T	A	T	0.0210925	0.348485	330	0.137215	0.8803	-1.46285
Pv2.1_10_42767377	Pv010	42767377	Pv2.1_10_42767377_C/T	C	T	0.0211389	0.0969697	330	0.137204	0.8803	-1.97379
Pv2.1_07_4078616	Pv07	4078616	Pv2.1_07_4078616_T/C	T	C	0.0213007	0.154545	330	0.137168	0.8803	-1.86784
Pv2.1_02_44263080	Pv02	44263080	Pv2.1_02_44263080_A/G	A	G	0.0213398	0.178788	330	0.137159	0.8803	-2.03538
Pv2.1_09_36130120	Pv09	36130120	Pv2.1_09_36130120_G/C	G	C	0.0215702	0.418182	330	0.137108	0.8803	-1.37827
Pv2.1_03_41553477	Pv03	41553477	Pv2.1_03_41553477_A/G	A	G	0.0216065	0.124242	330	0.1371	0.8803	-1.97646
Pv2.1_07_27633446	Pv07	27633446	Pv2.1_07_27633446_G/A	G	A	0.0216156	0.377273	330	0.137098	0.8803	-1.10884
Pv2.1_06_28731736	Pv06	28731736	Pv2.1_06_28731736_G/C	G	C	0.0216754	0.0530303	330	0.137084	0.8803	-2.12533
Pv2.1_05_11499593	Pv05	11499593	Pv2.1_05_11499593_T/C	T	C	0.0217381	0.0772727	330	0.137071	0.8803	2.4422
Pv2.1_07_4078970	Pv07	4078970	Pv2.1_07_4078970_G/A	G	A	0.0217518	0.0606061	330	0.137068	0.8803	-2.24758
Pv2.1_05_1463949	Pv05	1463949	Pv2.1_05_1463949_A/C	A	C	0.0218349	0.187879	330	0.137049	0.8803	-1.65391
Pv2.1_05_1463973	Pv05	1463973	Pv2.1_05_1463973_G/A	G	A	0.0218349	0.187879	330	0.137049	0.8803	1.65391
Pv2.1_07_37393459	Pv07	37393459	Pv2.1_07_37393459_G/A	G	A	0.0218662	0.106061	330	0.137043	0.8803	1.59222
Pv2.1_01_46764919	Pv01	46764919	Pv2.1_01_46764919_C/T	C	T	0.0218683	0.0590909	330	0.137042	0.8803	-2.34699
Pv2.1_04_41431586	Pv04	41431586	Pv2.1_04_41431586_T/C	T	C	0.0218812	0.0439394	330	0.137039	0.8803	-2.60615
Pv2.1_03_41092676	Pv03	41092676	Pv2.1_03_41092676_G/C	G	C	0.0221143	0.427273	330	0.136989	0.8803	-1.19007
Pv2.1_03_3443449	Pv03	3443449	Pv2.1_03_3443449_C/G	C	G	0.0221374	0.292424	330	0.136984	0.8803	-1.57102
Pv2.1_02_44424607	Pv02	44424607	Pv2.1_02_44424607_C/G	C	G	0.0223494	0.275758	330	0.136938	0.8803	-1.6897
Pv2.1_08_45457933	Pv08	45457933	Pv2.1_08_45457933_G/T	G	T	0.0223621	0.481818	330	0.136935	0.8803	1.24487
Pv2.1_02_48755406	Pv02	48755406	Pv2.1_02_48755406_A/C	A	C	0.0223867	0.313636	330	0.13693	0.8803	-1.36839
Pv2.1_01_1579769	Pv01	1579769	Pv2.1_01_1579769_T/C	T	C	0.022428	0.168182	330	0.136921	0.8803	1.34779
Pv2.1_03_42674089	Pv03	42674089	Pv2.1_03_42674089_A/C	A	C	0.0225604	0.254545	330	0.136893	0.881357	1.28626
Pv2.1_03_40736348	Pv03	40736348	Pv2.1_03_40736348_G/A	G	A	0.0228273	0.210606	330	0.136837	0.881357	1.42422
Pv2.1_04_8787444	Pv04	8787444	Pv2.1_04_8787444_A/G	A	G	0.0229324	0.216667	330	0.136815	0.881357	-1.69369
Pv2.1_10_43046870	Pv010	43046870	Pv2.1_10_43046870_C/T	C	T	0.0230724	0.05	330	0.136786	0.881357	-2.25599
Pv2.1_02_3781079	Pv02	3781079	Pv2.1_02_3781079_G/C	G	C	0.0231287	0.162121	330	0.136774	0.881357	-1.58171
Pv2.1_02_43786865	Pv02	43786865	Pv2.1_02_43786865_T/C	T	C	0.0232065	0.178788	330	0.136758	0.881357	2.23897
Pv2.1_02_3166880	Pv02	3166880	Pv2.1_02_3166880_A/C	A	C	0.0232114	0.127273	330	0.136757	0.881357	1.78849
Pv2.1_08_45457930	Pv08	45457930	Pv2.1_08_45457930_C/T	C	T	0.0232168	0.483333	330	0.136756	0.881357	1.23192
Pv2.1_11_44568604	Pv011	44568604	Pv2.1_11_44568604_A/C	A	C	0.0232979	0.465152	330	0.13674	0.881357	1.26599
Pv2.1_10_42906616	Pv010	42906616	Pv2.1_10_42906616_T/A	T	A	0.0234767	0.193939	330	0.136703	0.881357	1.60098
Pv2.1_04_126341	Pv04	126341	Pv2.1_04_126341_A/G	A	G	0.02361	0.49697	330	0.136676	0.881357	1.09784
Pv2.1_09_37679762	Pv09	37679762	Pv2.1_09_37679762_T/C	T	C	0.0237379	0.137879	330	0.13665	0.881357	1.8974
Pv2.1_02_44970383	Pv02	44970383	Pv2.1_02_44970383_A/G	A	G	0.0237648	0.14697	330	0.136645	0.881357	-2.07351
Pv2.1_02_44970387	Pv02	44970387	Pv2.1_02_44970387_C/G	C	G	0.0237648	0.14697	330	0.136645	0.881357	-2.07351
Pv2.1_03_45938868	Pv03	45938868	Pv2.1_03_45938868_T/G	T	G	0.023938	0.0848485	330	0.13661	0.884296	-1.84685
Pv2.1_08_62807488	Pv08	62807488	Pv2.1_08_62807488_G/A	G	A	0.024207	0.133333	330	0.136557	0.884364	-1.38869
Pv2.1_03_40571133	Pv03	40571133	Pv2.1_03_40571133_T/C	T	C	0.0242497	0.280303	330	0.136549	0.884364	1.45229
Pv2.1_09_37739833	Pv09	37739833	Pv2.1_09_37739833_C/T	C	T	0.0242504	0.0848485	330	0.136549	0.884364	-2.01205
Pv2.1_05_29904420	Pv05	29904420	Pv2.1_05_29904420_T/C	T	C	0.0243153	0.137879	330	0.136536	0.884364	-1.92518
Pv2.1_04_8787450	Pv04	8787450	Pv2.1_04_8787450_T/C	T	C	0.0246734	0.218182	330	0.136466	0.891152	1.62307
Pv2.1_05_1160824	Pv05	1160824	Pv2.1_05_1160824_G/C	G	C	0.0246912	0.127273	330	0.136463	0.891152	-1.51296
Pv2.1_06_21333878	Pv06	21333878	Pv2.1_06_21333878_A/C	A	C	0.0249181	0.195455	330	0.136419	0.894828	1.19723
Pv2.1_03_2553914	Pv03	2553914	Pv2.1_03_2553914_C/T	C	T	0.0251611	0.15303	330	0.136373	0.894828	1.94823
Pv2.1_02_24852430	Pv02	24852430	Pv2.1_02_24852430_C/G	C	G	0.025173	0.0530303	330	0.136371	0.894828	2.41945
Pv2.1_02_24852446	Pv02	24852446	Pv2.1_02_24852446_C/T	C	T	0.025173	0.0530303	330	0.136371	0.894828	2.41945
Pv2.1_04_46100176	Pv04	46100176	Pv2.1_04_46100176_C/A	C	A	0.0254224	0.309091	330	0.136324	0.900296	-1.37035
Pv2.1_07_2335741	Pv07	2335741	Pv2.1_07_2335741_A/T	A	T	0.0258081	0.139394	330	0.136253	0.905082	-2.43881
Pv2.1_06_22373875	Pv06	22373875	Pv2.1_06_22373875_T/C	T	C	0.0259277	0.140909	330	0.136231	0.905082	1.87855
Pv2.1_03_37428505	Pv03	37428505	Pv2.1_03_37428505_G/A	G	A	0.0259897	0.189394	330	0.136219	0.905082	2.1146
Pv2.1_07_34074399	Pv07	34074399	Pv2.1_07_34074399_C/T	C	T	0.0259988	0.0287879	330	0.136218	0.905082	3.27394
Pv2.1_03_40571428	Pv03	40571428	Pv2.1_03_40571428_A/G	A	G	0.0262895	0.133333	330	0.136165	0.905082	-1.70283
Pv2.1_02_31777883	Pv02	31777883	Pv2.1_02_31777883_A/G	A	G	0.0263835	0.140909	330	0.136148	0.905082	1.88171
Pv2.1_02_22741322	Pv02	22741322	Pv2.1_02_22741322_T/G	T	G	0.0263997	0.0712121	330	0.136145	0.905082	2.26153
Pv2.1_01_49126578	Pv01	49126578	Pv2.1_01_49126578_G/C	G	C	0.0264674	0.109091	330	0.136133	0.905082	-1.79188
Pv2.1_09_300677	Pv09	300677	Pv2.1_09_300677_C/T	C	T	0.0268081	0.171212	330	0.136072	0.905082	-1.70344
Pv2.1_10_39123688	Pv010	39123688	Pv2.1_10_39123688_T/G	T	G	0.027006	0.357576	330	0.136037	0.905082	1.30128
Pv2.1_10_39941883	Pv010	39941883	Pv2.1_10_39941883_G/A	G	A	0.0270627	0.14697	330	0.136028	0.905082	2.28775
Pv2.1_09_10978223	Pv09	10978223	Pv2.1_09_10978223_T/G	T	G	0.0270798	0.0318182	330	0.136025	0.905082	-2.62393
Pv2.1_02_12633813	Pv02	12633813	Pv2.1_02_12633813_C/T	C	T	0.027191	0.05	330	0.136005	0.905082	-2.62993
Pv2.1_04_46540292	Pv04	46540292	Pv2.1_04_46540292_G/A	G	A	0.0275573	0.122727	330	0.135942	0.905082	-1.50383
Pv2.1_03_13606669	Pv03	13606669	Pv2.1_03_13606669_C/G	C	G	0.0277369	0.0681818	330	0.135911	0.905082	2.12498
Pv2.1_01_48958527	Pv01	48958527	Pv2.1_01_48958527_A/G	A	G	0.0277843	0.118182	330	0.135903	0.905082	1.99223
Pv2.1_10_39234740	Pv010	39234740	Pv2.1_10_39234740_T/A	T	A	0.0280163	0.334848	330	0.135864	0.905082	1.29143
Pv2.1_10_41267275	Pv010	41267275	Pv2.1_10_41267275_G/C	G	C	0.0280731	0.416667	330	0.135854	0.905082	1.32825
Pv2.1_11_48934267	Pv011	48934267	Pv2.1_11_48934267_C/G	C	G	0.0281979	0.0681818	330	0.135833	0.905082	2.13971
Pv2.1_08_61671504	Pv08	61671504	Pv2.1_08_61671504_T/C	T	C	0.0282348	0.142424	330	0.135827	0.905082	-1.8676
Pv2.1_02_45179437	Pv02	45179437	Pv2.1_02_45179437_C/T	C	T	0.0282641	0.254545	330	0.135822	0.905082	-1.70362
Pv2.1_05_1463942	Pv05	1463942	Pv2.1_05_1463942_C/T	C	T	0.0282955	0.190909	330	0.135817	0.905082	-1.53936
Pv2.1_05_36585007	Pv05	36585007	Pv2.1_05_36585007_G/A	G	A	0.0285723	0.115152	330	0.135771	0.905082	-1.76274
Pv2.1_09_15650784	Pv09	15650784	Pv2.1_09_15650784_T/C	T	C	0.0285814	0.0590909	330	0.135769	0.905082	-2.03548
Pv2.1_08_62807489	Pv08	62807489	Pv2.1_08_62807489_C/G	C	G	0.02886	0.136364	330	0.135723	0.905082	1.34704
Pv2.1_06_28552968	Pv06	28552968	Pv2.1_06_28552968_G/A	G	A	0.0289801	0.165152	330	0.135704	0.905082	1.41272
Pv2.1_11_5777117	Pv011	5777117	Pv2.1_11_5777117_C/G	C	G	0.0291946	0.163636	330	0.135669	0.905082	-1.91363
Pv2.1_01_45688037	Pv01	45688037	Pv2.1_01_45688037_A/C	A	C	0.0292031	0.0484848	330	0.135668	0.905082	-2.59259
Pv2.1_09_15352616	Pv09	15352616	Pv2.1_09_15352616_C/A	C	A	0.0292821	0.183333	330	0.135655	0.905082	1.52142
Pv2.1_10_8924989	Pv010	8924989	Pv2.1_10_8924989_T/G	T	G	0.0292872	0.140909	330	0.135654	0.905082	-1.64266
Pv2.1_10_2389221	Pv010	2389221	Pv2.1_10_2389221_G/A	G	A	0.029402	0.0378788	330	0.135635	0.905082	-2.47038
Pv2.1_10_41911767	Pv010	41911767	Pv2.1_10_41911767_G/A	G	A	0.029421	0.231818	330	0.135632	0.905082	1.49508
Pv2.1_02_41973231	Pv02	41973231	Pv2.1_02_41973231_A/G	A	G	0.0294438	0.266667	330	0.135629	0.905082	-1.61925
Pv2.1_07_236545	Pv07	236545	Pv2.1_07_236545_T/C	T	C	0.0295447	0.233333	330	0.135613	0.905082	1.31982
Pv2.1_09_37800017	Pv09	37800017	Pv2.1_09_37800017_C/G	C	G	0.0295751	0.0469697	330	0.135608	0.905082	-2.08304
Pv2.1_04_45501831	Pv04	45501831	Pv2.1_04_45501831_A/G	A	G	0.029583	0.101515	330	0.135607	0.905082	1.86278
Pv2.1_10_39689580	Pv010	39689580	Pv2.1_10_39689580_G/C	G	C	0.0296077	0.328788	330	0.135603	0.905082	1.3609
Pv2.1_04_45501632	Pv04	45501632	Pv2.1_04_45501632_C/T	C	T	0.0296259	0.298485	330	0.1356	0.905082	-1.49739
Pv2.1_04_45501641	Pv04	45501641	Pv2.1_04_45501641_C/A	C	A	0.0296259	0.298485	330	0.1356	0.905082	1.49739
Pv2.1_06_26892426	Pv06	26892426	Pv2.1_06_26892426_G/T	G	T	0.0298112	0.121212	330	0.13557	0.905082	1.81109
Pv2.1_01_5319087	Pv01	5319087	Pv2.1_01_5319087_T/C	T	C	0.0301673	0.215152	330	0.135514	0.905082	2.0827
Pv2.1_07_18306471	Pv07	18306471	Pv2.1_07_18306471_T/G	T	G	0.0302183	0.190909	330	0.135506	0.905082	-1.57932
Pv2.1_09_7942875	Pv09	7942875	Pv2.1_09_7942875_G/C	G	C	0.0302857	0.0424242	330	0.135496	0.905082	-2.52077
Pv2.1_04_47116292	Pv04	47116292	Pv2.1_04_47116292_C/T	C	T	0.030374	0.0833333	330	0.135482	0.905082	1.77512
Pv2.1_02_43624206	Pv02	43624206	Pv2.1_02_43624206_A/G	A	G	0.0304093	0.172727	330	0.135477	0.905082	-2.07964
Pv2.1_08_792971	Pv08	792971	Pv2.1_08_792971_A/G	A	G	0.0304733	0.245455	330	0.135467	0.905082	1.15756
Pv2.1_04_47485913	Pv04	47485913	Pv2.1_04_47485913_A/C	A	C	0.0304764	0.25303	330	0.135466	0.905082	1.58064
Pv2.1_10_43376061	Pv010	43376061	Pv2.1_10_43376061_G/A	G	A	0.0304839	0.169697	330	0.135465	0.905082	1.60705
Pv2.1_08_792959	Pv08	792959	Pv2.1_08_792959_T/C	T	C	0.0305131	0.24697	330	0.135461	0.905082	-1.16179
Pv2.1_10_39394402	Pv010	39394402	Pv2.1_10_39394402_T/A	T	A	0.0305859	0.336364	330	0.135449	0.905082	1.39926
Pv2.1_02_49212691	Pv02	49212691	Pv2.1_02_49212691_T/C	T	C	0.030655	0.162121	330	0.135439	0.905082	1.37167
Pv2.1_02_32208182	Pv02	32208182	Pv2.1_02_32208182_C/G	C	G	0.0306794	0.112121	330	0.135435	0.905082	2.0914
Pv2.1_03_30678379	Pv03	30678379	Pv2.1_03_30678379_C/G	C	G	0.0307066	0.189394	330	0.135431	0.905082	1.27327
Pv2.1_05_36126918	Pv05	36126918	Pv2.1_05_36126918_C/T	C	T	0.0307584	0.309091	330	0.135423	0.905082	1.08477
Pv2.1_04_47628200	Pv04	47628200	Pv2.1_04_47628200_C/T	C	T	0.0308821	0.271212	330	0.135404	0.905082	1.32236
Pv2.1_03_42941600	Pv03	42941600	Pv2.1_03_42941600_A/T	A	T	0.030938	0.0378788	330	0.135395	0.905082	2.14259
Pv2.1_03_41653152	Pv03	41653152	Pv2.1_03_41653152_G/C	G	C	0.0313613	0.3	330	0.135331	0.910301	1.36645
Pv2.1_02_43529828	Pv02	43529828	Pv2.1_02_43529828_C/G	C	G	0.031391	0.187879	330	0.135327	0.910301	-2.14021
Pv2.1_07_54250	Pv07	54250	Pv2.1_07_54250_A/G	A	G	0.0315052	0.154545	330	0.13531	0.910301	-1.70934
Pv2.1_02_14889467	Pv02	14889467	Pv2.1_02_14889467_G/T	G	T	0.0315911	0.0878788	330	0.135297	0.910301	-2.08844
Pv2.1_07_3919740	Pv07	3919740	Pv2.1_07_3919740_A/T	A	T	0.0315996	0.45303	330	0.135296	0.910301	-1.17721
Pv2.1_08_50649700	Pv08	50649700	Pv2.1_08_50649700_A/C	A	C	0.0319235	0.143939	330	0.135248	0.915194	1.42361
Pv2.1_03_2580128	Pv03	2580128	Pv2.1_03_2580128_G/A	G	A	0.0319638	0.0393939	330	0.135242	0.915194	-2.71034
Pv2.1_09_38104869	Pv09	38104869	Pv2.1_09_38104869_G/A	G	A	0.0320711	0.20303	330	0.135226	0.915483	-1.56366
Pv2.1_01_49126575	Pv01	49126575	Pv2.1_01_49126575_T/G	T	G	0.0324432	0.113636	330	0.135172	0.91661	-1.71157
Pv2.1_04_43919666	Pv04	43919666	Pv2.1_04_43919666_G/A	G	A	0.0325618	0.24697	330	0.135155	0.91661	1.42689
Pv2.1_02_43893269	Pv02	43893269	Pv2.1_02_43893269_T/C	T	C	0.032566	0.269697	330	0.135154	0.91661	1.5483
Pv2.1_07_18306472	Pv07	18306472	Pv2.1_07_18306472_A/C	A	C	0.0326095	0.187879	330	0.135148	0.91661	1.535
Pv2.1_05_36471232	Pv05	36471232	Pv2.1_05_36471232_T/G	T	G	0.0326987	0.0439394	330	0.135135	0.91661	-2.24855
Pv2.1_04_43299446	Pv04	43299446	Pv2.1_04_43299446_T/C	T	C	0.0327371	0.195455	330	0.13513	0.91661	-2.16124
Pv2.1_02_43371239	Pv02	43371239	Pv2.1_02_43371239_T/C	T	C	0.03319	0.156061	330	0.135065	0.91661	1.87029
Pv2.1_05_26073755	Pv05	26073755	Pv2.1_05_26073755_T/G	T	G	0.0332122	0.0454545	330	0.135062	0.91661	1.86424
Pv2.1_06_22508433	Pv06	22508433	Pv2.1_06_22508433_T/G	T	G	0.0332654	0.080303	330	0.135054	0.91661	-1.92748
Pv2.1_04_46188738	Pv04	46188738	Pv2.1_04_46188738_C/T	C	T	0.0332754	0.354545	330	0.135053	0.91661	1.07949
Pv2.1_08_773434	Pv08	773434	Pv2.1_08_773434_T/C	T	C	0.0333524	0.321212	330	0.135042	0.91661	-1.14307
Pv2.1_05_38815492	Pv05	38815492	Pv2.1_05_38815492_G/A	G	A	0.0334262	0.0484848	330	0.135032	0.91661	2.1476
Pv2.1_10_38747248	Pv010	38747248	Pv2.1_10_38747248_A/C	A	C	0.0335403	0.195455	330	0.135016	0.91661	1.6942
Pv2.1_10_24039075	Pv010	24039075	Pv2.1_10_24039075_G/A	G	A	0.033598	0.0757576	330	0.135008	0.91661	-1.80145
Pv2.1_03_50758399	Pv03	50758399	Pv2.1_03_50758399_T/C	T	C	0.0336892	0.1	330	0.134995	0.91661	-1.83441
Pv2.1_03_45481021	Pv03	45481021	Pv2.1_03_45481021_A/C	A	C	0.0338019	0.163636	330	0.134979	0.91661	1.64253
Pv2.1_04_44784865	Pv04	44784865	Pv2.1_04_44784865_A/T	A	T	0.0338134	0.263636	330	0.134978	0.91661	1.53357
Pv2.1_02_47600680	Pv02	47600680	Pv2.1_02_47600680_C/G	C	G	0.0338957	0.0424242	330	0.134966	0.91661	2.12677
Pv2.1_07_643459	Pv07	643459	Pv2.1_07_643459_G/T	G	T	0.0341845	0.134848	330	0.134927	0.91661	-1.61694
Pv2.1_02_11948793	Pv02	11948793	Pv2.1_02_11948793_T/A	T	A	0.0343191	0.216667	330	0.134908	0.91661	1.53584
Pv2.1_04_44943954	Pv04	44943954	Pv2.1_04_44943954_C/T	C	T	0.0343883	0.0363636	330	0.134899	0.91661	2.42497
Pv2.1_09_10358133	Pv09	10358133	Pv2.1_09_10358133_G/A	G	A	0.0344332	0.0348485	330	0.134893	0.91661	-2.8658
Pv2.1_01_50814736	Pv01	50814736	Pv2.1_01_50814736_C/T	C	T	0.0344842	0.166667	330	0.134886	0.91661	-1.75582
Pv2.1_01_45653685	Pv01	45653685	Pv2.1_01_45653685_G/A	G	A	0.0345215	0.0484848	330	0.134881	0.91661	2.76326
Pv2.1_02_23295142	Pv02	23295142	Pv2.1_02_23295142_T/C	T	C	0.0346508	0.0742424	330	0.134863	0.91661	2.16676
Pv2.1_05_6032773	Pv05	6032773	Pv2.1_05_6032773_T/A	T	A	0.0347363	0.121212	330	0.134852	0.91661	2.10387
Pv2.1_10_39231861	Pv010	39231861	Pv2.1_10_39231861_C/A	C	A	0.0347469	0.321212	330	0.13485	0.91661	1.2724
Pv2.1_01_41866505	Pv01	41866505	Pv2.1_01_41866505_G/A	G	A	0.0348351	0.145455	330	0.134838	0.91661	-1.62347
Pv2.1_07_4877084	Pv07	4877084	Pv2.1_07_4877084_T/C	T	C	0.034978	0.0772727	330	0.134819	0.917808	-2.75651
Pv2.1_01_47745607	Pv01	47745607	Pv2.1_01_47745607_C/G	C	G	0.0353721	0.0530303	330	0.134767	0.920245	-2.80392
Pv2.1_02_48682269	Pv02	48682269	Pv2.1_02_48682269_G/A	G	A	0.0355917	0.0939394	330	0.134738	0.920245	1.60657
Pv2.1_09_17293892	Pv09	17293892	Pv2.1_09_17293892_C/A	C	A	0.0356442	0.162121	330	0.134731	0.920245	1.88153
Pv2.1_07_39620945	Pv07	39620945	Pv2.1_07_39620945_G/A	G	A	0.0356484	0.251515	330	0.13473	0.920245	-1.35063
Pv2.1_07_4323573	Pv07	4323573	Pv2.1_07_4323573_G/C	G	C	0.0357952	0.118182	330	0.134711	0.920245	-1.99914
Pv2.1_11_30441057	Pv011	30441057	Pv2.1_11_30441057_A/G	A	G	0.0359639	0.215152	330	0.134689	0.920245	1.25853
Pv2.1_03_52011156	Pv03	52011156	Pv2.1_03_52011156_G/A	G	A	0.0360775	0.171212	330	0.134674	0.920245	-1.40608
Pv2.1_10_42077866	Pv010	42077866	Pv2.1_10_42077866_G/T	G	T	0.0361278	0.151515	330	0.134668	0.920245	1.53762
Pv2.1_03_42710125	Pv03	42710125	Pv2.1_03_42710125_A/G	A	G	0.0362506	0.0954545	330	0.134652	0.920245	1.638
Pv2.1_06_28731737	Pv06	28731737	Pv2.1_06_28731737_G/T	G	T	0.0362634	0.0545455	330	0.13465	0.920245	1.95753
Pv2.1_02_659628	Pv02	659628	Pv2.1_02_659628_G/A	G	A	0.0363861	0.216667	330	0.134635	0.920245	-1.35267
Pv2.1_09_37800016	Pv09	37800016	Pv2.1_09_37800016_C/G	C	G	0.03645	0.05	330	0.134626	0.920245	-1.92762
Pv2.1_02_44059048	Pv02	44059048	Pv2.1_02_44059048_T/C	T	C	0.0365331	0.210606	330	0.134616	0.920245	1.74539
Pv2.1_03_4864997	Pv03	4864997	Pv2.1_03_4864997_A/C	A	C	0.0366122	0.110606	330	0.134606	0.920245	-1.7345
Pv2.1_02_2739781	Pv02	2739781	Pv2.1_02_2739781_A/G	A	G	0.0368198	0.178788	330	0.134579	0.920245	1.54536
Pv2.1_02_86831	Pv02	86831	Pv2.1_02_86831_C/T	C	T	0.0369054	0.125758	330	0.134569	0.920245	-1.46611
Pv2.1_03_45455073	Pv03	45455073	Pv2.1_03_45455073_A/T	A	T	0.0370713	0.216667	330	0.134548	0.920245	1.57482
Pv2.1_02_2083433	Pv02	2083433	Pv2.1_02_2083433_T/A	T	A	0.0371198	0.210606	330	0.134541	0.920245	-1.21556
Pv2.1_04_32421286	Pv04	32421286	Pv2.1_04_32421286_T/G	T	G	0.0371443	0.116667	330	0.134538	0.920245	-2.28323
Pv2.1_02_41877275	Pv02	41877275	Pv2.1_02_41877275_A/C	A	C	0.037182	0.306061	330	0.134534	0.920245	-1.38374
Pv2.1_02_36931591	Pv02	36931591	Pv2.1_02_36931591_G/A	G	A	0.0371899	0.171212	330	0.134533	0.920245	1.39852
Pv2.1_01_46763749	Pv01	46763749	Pv2.1_01_46763749_C/A	C	A	0.0372201	0.0757576	330	0.134529	0.920245	1.88104
Pv2.1_03_51643214	Pv03	51643214	Pv2.1_03_51643214_G/A	G	A	0.0373989	0.124242	330	0.134507	0.922246	-1.61772
Pv2.1_10_42014584	Pv010	42014584	Pv2.1_10_42014584_A/C	A	C	0.0376786	0.128788	330	0.134472	0.925386	1.55843
Pv2.1_11_9060480	Pv011	9060480	Pv2.1_11_9060480_G/A	G	A	0.0378191	0.2	330	0.134454	0.925386	-1.35438
Pv2.1_11_49117257	Pv011	49117257	Pv2.1_11_49117257_G/A	G	A	0.037821	0.0954545	330	0.134454	0.925386	1.68861
Pv2.1_04_47066275	Pv04	47066275	Pv2.1_04_47066275_C/G	C	G	0.0383825	0.2	330	0.134386	0.92676	-1.78025
Pv2.1_04_11379556	Pv04	11379556	Pv2.1_04_11379556_A/T	A	T	0.0384011	0.418182	330	0.134383	0.92676	-1.76332
Pv2.1_04_11379557	Pv04	11379557	Pv2.1_04_11379557_T/A	T	A	0.0384011	0.418182	330	0.134383	0.92676	1.76332
Pv2.1_03_51934878	Pv03	51934878	Pv2.1_03_51934878_T/C	T	C	0.0384461	0.242424	330	0.134378	0.92676	-1.4527
Pv2.1_02_24370801	Pv02	24370801	Pv2.1_02_24370801_C/T	C	T	0.0385948	0.0863636	330	0.13436	0.92676	-2.0087
Pv2.1_02_43529894	Pv02	43529894	Pv2.1_02_43529894_T/G	T	G	0.0386498	0.118182	330	0.134353	0.92676	2.30397
Pv2.1_03_40602471	Pv03	40602471	Pv2.1_03_40602471_C/G	C	G	0.0386617	0.151515	330	0.134352	0.92676	-1.47849
Pv2.1_02_23980090	Pv02	23980090	Pv2.1_02_23980090_G/T	G	T	0.0391455	0.113636	330	0.134294	0.92676	-1.87266
Pv2.1_01_51081850	Pv01	51081850	Pv2.1_01_51081850_T/C	T	C	0.0393185	0.222727	330	0.134273	0.92676	-1.36896
Pv2.1_09_9381693	Pv09	9381693	Pv2.1_09_9381693_A/C	A	C	0.0393682	0.0484848	330	0.134268	0.92676	2.57223
Pv2.1_03_42944158	Pv03	42944158	Pv2.1_03_42944158_A/T	A	T	0.0394266	0.122727	330	0.134261	0.92676	-1.53893
Pv2.1_05_40841552	Pv05	40841552	Pv2.1_05_40841552_A/T	A	T	0.0394804	0.0575758	330	0.134254	0.92676	-2.25388
Pv2.1_02_43816600	Pv02	43816600	Pv2.1_02_43816600_A/T	A	T	0.0395099	0.20303	330	0.134251	0.92676	-1.86138
Pv2.1_04_2414288	Pv04	2414288	Pv2.1_04_2414288_A/G	A	G	0.0396259	0.263636	330	0.134237	0.92676	1.21948
Pv2.1_05_40463700	Pv05	40463700	Pv2.1_05_40463700_A/G	A	G	0.0397243	0.0787879	330	0.134226	0.92676	-1.65123
Pv2.1_03_51934962	Pv03	51934962	Pv2.1_03_51934962_T/G	T	G	0.0398474	0.239394	330	0.134211	0.92676	-1.37303
Pv2.1_07_528622	Pv07	528622	Pv2.1_07_528622_T/C	T	C	0.0399624	0.0848485	330	0.134198	0.92676	1.97977
Pv2.1_11_1163865	Pv011	1163865	Pv2.1_11_1163865_A/G	A	G	0.040021	0.15303	330	0.134191	0.92676	1.50907
Pv2.1_03_12118897	Pv03	12118897	Pv2.1_03_12118897_G/A	G	A	0.0400782	0.0484848	330	0.134184	0.92676	2.12149
Pv2.1_08_2007815	Pv08	2007815	Pv2.1_08_2007815_G/A	G	A	0.0403405	0.113636	330	0.134154	0.92676	1.42945
Pv2.1_05_6768521	Pv05	6768521	Pv2.1_05_6768521_A/G	A	G	0.0403879	0.0469697	330	0.134149	0.92676	-2.58059
Pv2.1_08_59139004	Pv08	59139004	Pv2.1_08_59139004_G/T	G	T	0.0404591	0.177273	330	0.13414	0.92676	1.68013
Pv2.1_02_44491562	Pv02	44491562	Pv2.1_02_44491562_G/C	G	C	0.0404738	0.236364	330	0.134139	0.92676	1.58819
Pv2.1_05_1463909	Pv05	1463909	Pv2.1_05_1463909_C/G	C	G	0.0406199	0.2	330	0.134122	0.92676	-1.46454
Pv2.1_03_41598107	Pv03	41598107	Pv2.1_03_41598107_A/G	A	G	0.0407029	0.222727	330	0.134113	0.92676	1.37919
Pv2.1_08_792996	Pv08	792996	Pv2.1_08_792996_A/T	A	T	0.0407725	0.245455	330	0.134105	0.92676	1.1327
Pv2.1_07_28871925	Pv07	28871925	Pv2.1_07_28871925_C/G	C	G	0.0408351	0.0484848	330	0.134098	0.92676	2.42073
Pv2.1_01_5474136	Pv01	5474136	Pv2.1_01_5474136_C/A	C	A	0.0408363	0.25303	330	0.134097	0.92676	-1.20727
Pv2.1_01_51135688	Pv01	51135688	Pv2.1_01_51135688_C/G	C	G	0.0408775	0.193939	330	0.134093	0.92676	1.60139
Pv2.1_05_40437504	Pv05	40437504	Pv2.1_05_40437504_T/A	T	A	0.0408792	0.480303	330	0.134093	0.92676	0.957256
Pv2.1_09_11918914	Pv09	11918914	Pv2.1_09_11918914_G/C	G	C	0.040928	0.0954545	330	0.134087	0.92676	-2.06474
Pv2.1_02_518592	Pv02	518592	Pv2.1_02_518592_C/G	C	G	0.0412761	0.187879	330	0.134048	0.92676	-1.37227
Pv2.1_03_50443314	Pv03	50443314	Pv2.1_03_50443314_G/A	G	A	0.0413417	0.0409091	330	0.13404	0.92676	-2.42575
Pv2.1_03_50443318	Pv03	50443318	Pv2.1_03_50443318_G/T	G	T	0.0413417	0.0409091	330	0.13404	0.92676	2.42575
Pv2.1_07_5637927	Pv07	5637927	Pv2.1_07_5637927_A/T	A	T	0.0413788	0.174242	330	0.134036	0.92676	1.68684
Pv2.1_10_3472794	Pv010	3472794	Pv2.1_10_3472794_T/A	T	A	0.0414189	0.172727	330	0.134032	0.92676	-1.25267
Pv2.1_10_3492590	Pv010	3492590	Pv2.1_10_3492590_T/C	T	C	0.0415387	0.195455	330	0.134018	0.927238	-1.34907
Pv2.1_09_32633613	Pv09	32633613	Pv2.1_09_32633613_A/T	A	T	0.0417449	0.186364	330	0.133995	0.929638	-1.85508
Pv2.1_05_4071974	Pv05	4071974	Pv2.1_05_4071974_A/C	A	C	0.0418624	0.0909091	330	0.133982	0.930056	-1.72378
Pv2.1_10_22683285	Pv010	22683285	Pv2.1_10_22683285_A/C	A	C	0.0419709	0.125758	330	0.13397	0.930272	-1.70825
Pv2.1_05_40601331	Pv05	40601331	Pv2.1_05_40601331_T/A	T	A	0.0425918	0.101515	330	0.133902	0.939614	1.96847
Pv2.1_05_40601332	Pv05	40601332	Pv2.1_05_40601332_T/A	T	A	0.0425918	0.101515	330	0.133902	0.939614	1.96847
Pv2.1_02_12351151	Pv02	12351151	Pv2.1_02_12351151_T/C	T	C	0.0427827	0.0378788	330	0.133882	0.941619	2.41693
Pv2.1_02_7275537	Pv02	7275537	Pv2.1_02_7275537_A/C	A	C	0.0430255	0.0924242	330	0.133855	0.942147	-2.03227
Pv2.1_11_50105615	Pv011	50105615	Pv2.1_11_50105615_G/A	G	A	0.0430316	0.225758	330	0.133855	0.942147	-1.3104
Pv2.1_04_47425703	Pv04	47425703	Pv2.1_04_47425703_A/G	A	G	0.043196	0.210606	330	0.133837	0.942147	1.22388
Pv2.1_03_43092849	Pv03	43092849	Pv2.1_03_43092849_G/C	G	C	0.0432997	0.0590909	330	0.133826	0.942147	1.704
Pv2.1_02_1334118	Pv02	1334118	Pv2.1_02_1334118_C/T	C	T	0.0433067	0.221212	330	0.133825	0.942147	1.43673
Pv2.1_05_39161200	Pv05	39161200	Pv2.1_05_39161200_C/T	C	T	0.0434936	0.381818	330	0.133805	0.943824	0.955358
Pv2.1_11_4347999	Pv011	4347999	Pv2.1_11_4347999_G/A	G	A	0.0435983	0.206061	330	0.133794	0.943824	1.31181
Pv2.1_03_44102474	Pv03	44102474	Pv2.1_03_44102474_A/G	A	G	0.0437193	0.262121	330	0.133781	0.943824	-1.39289
Pv2.1_03_2580158	Pv03	2580158	Pv2.1_03_2580158_C/T	C	T	0.0438651	0.0454545	330	0.133766	0.943824	2.405
Pv2.1_01_47598105	Pv01	47598105	Pv2.1_01_47598105_C/G	C	G	0.0438848	0.0772727	330	0.133764	0.943824	-1.98691
Pv2.1_04_4560403	Pv04	4560403	Pv2.1_04_4560403_G/C	G	C	0.0443942	0.0651515	330	0.133711	0.94916	2.07294
Pv2.1_03_40856602	Pv03	40856602	Pv2.1_03_40856602_T/A	T	A	0.0444221	0.0969697	330	0.133708	0.94916	-1.45157
Pv2.1_02_39814197	Pv02	39814197	Pv2.1_02_39814197_A/G	A	G	0.0445914	0.122727	330	0.13369	0.94916	1.57696
Pv2.1_09_38137233	Pv09	38137233	Pv2.1_09_38137233_G/A	G	A	0.0446092	0.0333333	330	0.133688	0.94916	2.73322
Pv2.1_04_47654276	Pv04	47654276	Pv2.1_04_47654276_A/T	A	T	0.0446367	0.2	330	0.133685	0.94916	1.4891
Pv2.1_07_956000	Pv07	956000	Pv2.1_07_956000_C/T	C	T	0.0448971	0.109091	330	0.133659	0.949635	-1.70187
Pv2.1_10_42780520	Pv010	42780520	Pv2.1_10_42780520_C/T	C	T	0.0449927	0.171212	330	0.133649	0.949635	1.41345
Pv2.1_10_42930980	Pv010	42930980	Pv2.1_10_42930980_C/A	C	A	0.045047	0.0575758	330	0.133643	0.949635	1.80346
Pv2.1_07_36711198	Pv07	36711198	Pv2.1_07_36711198_G/T	G	T	0.0452197	0.35303	330	0.133625	0.949635	0.960783
Pv2.1_02_4121793	Pv02	4121793	Pv2.1_02_4121793_A/G	A	G	0.0453045	0.0818182	330	0.133617	0.949635	2.04893
Pv2.1_03_37139	Pv03	37139	Pv2.1_03_37139_T/C	T	C	0.0456031	0.0969697	330	0.133587	0.949635	-1.5964
Pv2.1_02_44059049	Pv02	44059049	Pv2.1_02_44059049_T/A	T	A	0.0458599	0.210606	330	0.133561	0.949635	1.67982
Pv2.1_04_47237015	Pv04	47237015	Pv2.1_04_47237015_C/A	C	A	0.046091	0.207576	330	0.133537	0.949635	-1.38029
Pv2.1_09_10678498	Pv09	10678498	Pv2.1_09_10678498_G/A	G	A	0.0460947	0.030303	330	0.133537	0.949635	-2.9658
Pv2.1_07_25939865	Pv07	25939865	Pv2.1_07_25939865_C/G	C	G	0.046158	0.0606061	330	0.133531	0.949635	-2.30414
Pv2.1_06_23719056	Pv06	23719056	Pv2.1_06_23719056_T/C	T	C	0.0462285	0.195455	330	0.133524	0.949635	1.41917
Pv2.1_07_1514061	Pv07	1514061	Pv2.1_07_1514061_T/C	T	C	0.0463362	0.166667	330	0.133513	0.949635	1.54571
Pv2.1_10_42602250	Pv010	42602250	Pv2.1_10_42602250_C/T	C	T	0.0465634	0.0909091	330	0.13349	0.949635	-1.73229
Pv2.1_05_11706396	Pv05	11706396	Pv2.1_05_11706396_G/T	G	T	0.0466172	0.101515	330	0.133485	0.949635	-1.75804
Pv2.1_01_46157434	Pv01	46157434	Pv2.1_01_46157434_G/C	G	C	0.0466269	0.0363636	330	0.133484	0.949635	2.72448
Pv2.1_07_36558051	Pv07	36558051	Pv2.1_07_36558051_A/G	A	G	0.0467996	0.106061	330	0.133467	0.949635	-1.73423
Pv2.1_10_43424808	Pv010	43424808	Pv2.1_10_43424808_T/C	T	C	0.0468421	0.0575758	330	0.133463	0.949635	1.80701
Pv2.1_04_47087177	Pv04	47087177	Pv2.1_04_47087177_T/C	T	C	0.0468537	0.172727	330	0.133462	0.949635	-1.37085
Pv2.1_03_42381285	Pv03	42381285	Pv2.1_03_42381285_G/T	G	T	0.0473259	0.35	330	0.133416	0.949635	1.0879
Pv2.1_01_51036529	Pv01	51036529	Pv2.1_01_51036529_A/G	A	G	0.0474324	0.0378788	330	0.133405	0.949635	-2.4126
Pv2.1_03_32678313	Pv03	32678313	Pv2.1_03_32678313_A/C	A	C	0.0474549	0.128788	330	0.133403	0.949635	1.59087
Pv2.1_09_32710192	Pv09	32710192	Pv2.1_09_32710192_A/G	A	G	0.0475699	0.187879	330	0.133392	0.949635	-1.65698
Pv2.1_02_2543793	Pv02	2543793	Pv2.1_02_2543793_T/C	T	C	0.047651	0.177273	330	0.133384	0.949635	-1.45478
Pv2.1_07_28534158	Pv07	28534158	Pv2.1_07_28534158_G/A	G	A	0.0477289	0.0348485	330	0.133377	0.949635	-2.40191
Pv2.1_05_8547215	Pv05	8547215	Pv2.1_05_8547215_C/A	C	A	0.0478075	0.0424242	330	0.133369	0.949635	2.26416
Pv2.1_10_43376069	Pv010	43376069	Pv2.1_10_43376069_A/G	A	G	0.0478305	0.180303	330	0.133367	0.949635	-1.44996
Pv2.1_03_2511550	Pv03	2511550	Pv2.1_03_2511550_T/G	T	G	0.047939	0.180303	330	0.133356	0.949635	-1.59422
Pv2.1_11_47186045	Pv011	47186045	Pv2.1_11_47186045_G/T	G	T	0.0479926	0.415152	330	0.133351	0.949635	1.17303
Pv2.1_03_5522910	Pv03	5522910	Pv2.1_03_5522910_A/C	A	C	0.0481254	0.112121	330	0.133339	0.949635	-1.5414
Pv2.1_08_773405	Pv08	773405	Pv2.1_08_773405_G/A	G	A	0.048403	0.322727	330	0.133312	0.949635	-1.04826
Pv2.1_07_5442890	Pv07	5442890	Pv2.1_07_5442890_C/A	C	A	0.0484321	0.0727273	330	0.133309	0.949635	-2.54259
Pv2.1_10_39232025	Pv010	39232025	Pv2.1_10_39232025_G/A	G	A	0.0485302	0.324242	330	0.1333	0.949635	1.24494
Pv2.1_11_32184628	Pv011	32184628	Pv2.1_11_32184628_G/A	G	A	0.0486771	0.207576	330	0.133286	0.949635	-1.14635
Pv2.1_10_39398704	Pv010	39398704	Pv2.1_10_39398704_C/T	C	T	0.0486979	0.378788	330	0.133284	0.949635	-1.28744
Pv2.1_01_46599602	Pv01	46599602	Pv2.1_01_46599602_C/G	C	G	0.0488343	0.0560606	330	0.133271	0.949635	-2.23138
Pv2.1_11_47186006	Pv011	47186006	Pv2.1_11_47186006_C/T	C	T	0.0488549	0.0333333	330	0.133269	0.949635	2.48458
Pv2.1_11_47186015	Pv011	47186015	Pv2.1_11_47186015_C/G	C	G	0.0488549	0.0333333	330	0.133269	0.949635	2.48458
Pv2.1_04_3787284	Pv04	3787284	Pv2.1_04_3787284_G/A	G	A	0.0489605	0.0651515	330	0.13326	0.949635	-2.03621
Pv2.1_04_3975292	Pv04	3975292	Pv2.1_04_3975292_G/A	G	A	0.0490005	0.498485	330	0.133256	0.949635	0.804278
Pv2.1_10_42388034	Pv010	42388034	Pv2.1_10_42388034_G/A	G	A	0.0491979	0.1	330	0.133237	0.949635	-1.69655
Pv2.1_10_42388055	Pv010	42388055	Pv2.1_10_42388055_C/A	C	A	0.0491979	0.1	330	0.133237	0.949635	-1.69655
Pv2.1_11_1248864	Pv011	1248864	Pv2.1_11_1248864_A/G	A	G	0.0494485	0.14697	330	0.133214	0.949635	-1.4926
Pv2.1_07_3961816	Pv07	3961816	Pv2.1_07_3961816_A/G	A	G	0.0496002	0.456061	330	0.1332	0.949635	-1.08587
Pv2.1_07_4174867	Pv07	4174867	Pv2.1_07_4174867_A/C	A	C	0.049607	0.130303	330	0.133199	0.949635	1.71164
Pv2.1_02_49182040	Pv02	49182040	Pv2.1_02_49182040_C/T	C	T	0.0496102	0.25	330	0.133199	0.949635	1.22019
Pv2.1_04_44385346	Pv04	44385346	Pv2.1_04_44385346_C/G	C	G	0.0496433	0.178788	330	0.133196	0.949635	1.39746
Pv2.1_03_2580077	Pv03	2580077	Pv2.1_03_2580077_G/A	G	A	0.049835	0.0590909	330	0.133178	0.949635	-2.06468
Pv2.1_11_49117262	Pv011	49117262	Pv2.1_11_49117262_G/A	G	A	0.0499205	0.101515	330	0.13317	0.949635	1.5701
Pv2.1_10_9012066	Pv010	9012066	Pv2.1_10_9012066_T/C	T	C	0.0499842	0.478788	330	0.133165	0.949635	0.954902
Pv2.1_02_43371237	Pv02	43371237	Pv2.1_02_43371237_T/C	T	C	0.050124	0.160606	330	0.133152	0.949635	1.61247
Pv2.1_10_36803719	Pv010	36803719	Pv2.1_10_36803719_T/A	T	A	0.0501654	0.0878788	330	0.133148	0.949635	-1.89662
Pv2.1_02_43893307	Pv02	43893307	Pv2.1_02_43893307_C/A	C	A	0.05046	0.266667	330	0.133121	0.949635	1.5795
Pv2.1_07_3961740	Pv07	3961740	Pv2.1_07_3961740_A/G	A	G	0.0505027	0.471212	330	0.133117	0.949635	-1.10423
Pv2.1_02_47556093	Pv02	47556093	Pv2.1_02_47556093_A/G	A	G	0.0505452	0.0681818	330	0.133113	0.949635	-1.89027
Pv2.1_01_5848070	Pv01	5848070	Pv2.1_01_5848070_A/T	A	T	0.0505572	0.183333	330	0.133112	0.949635	-1.60019
Pv2.1_05_1142964	Pv05	1142964	Pv2.1_05_1142964_T/G	T	G	0.0505827	0.104545	330	0.13311	0.949635	-1.4447
Pv2.1_03_2504233	Pv03	2504233	Pv2.1_03_2504233_A/G	A	G	0.0506083	0.0757576	330	0.133108	0.949635	1.79525
Pv2.1_03_47089716	Pv03	47089716	Pv2.1_03_47089716_G/A	G	A	0.0509865	0.156061	330	0.133074	0.949635	-1.63079
Pv2.1_02_46089245	Pv02	46089245	Pv2.1_02_46089245_C/A	C	A	0.0510282	0.189394	330	0.13307	0.949635	1.37199
Pv2.1_03_41652525	Pv03	41652525	Pv2.1_03_41652525_A/C	A	C	0.0511068	0.3	330	0.133063	0.949635	-1.21414
Pv2.1_04_5796991	Pv04	5796991	Pv2.1_04_5796991_T/C	T	C	0.0513539	0.0590909	330	0.133041	0.949635	-2.00818
Pv2.1_09_10763996	Pv09	10763996	Pv2.1_09_10763996_C/T	C	T	0.0513741	0.325758	330	0.133039	0.949635	1.05484
Pv2.1_02_25059190	Pv02	25059190	Pv2.1_02_25059190_C/T	C	T	0.051396	0.0666667	330	0.133037	0.949635	2.13708
Pv2.1_01_51135669	Pv01	51135669	Pv2.1_01_51135669_T/A	T	A	0.0515538	0.190909	330	0.133023	0.949635	-1.56243
Pv2.1_11_35946088	Pv011	35946088	Pv2.1_11_35946088_C/G	C	G	0.0516653	0.127273	330	0.133013	0.949635	1.68097
Pv2.1_11_53481447	Pv011	53481447	Pv2.1_11_53481447_T/A	T	A	0.0516757	0.290909	330	0.133012	0.949635	1.09234
Pv2.1_05_40486534	Pv05	40486534	Pv2.1_05_40486534_T/G	T	G	0.0517061	0.131818	330	0.133009	0.949635	1.66243
Pv2.1_01_5619921	Pv01	5619921	Pv2.1_01_5619921_A/G	A	G	0.0519186	0.0681818	330	0.132991	0.949635	-2.03758
Pv2.1_11_42825810	Pv011	42825810	Pv2.1_11_42825810_T/C	T	C	0.0520931	0.186364	330	0.132975	0.949635	1.57956
Pv2.1_10_39231906	Pv010	39231906	Pv2.1_10_39231906_T/G	T	G	0.0521106	0.322727	330	0.132974	0.949635	1.19898
Pv2.1_02_49490549	Pv02	49490549	Pv2.1_02_49490549_T/G	T	G	0.0522501	0.5	330	0.132961	0.949635	1.05219
Pv2.1_09_10359832	Pv09	10359832	Pv2.1_09_10359832_A/G	A	G	0.0525198	0.0363636	330	0.132938	0.949635	2.63024
Pv2.1_10_42931004	Pv010	42931004	Pv2.1_10_42931004_T/A	T	A	0.0525247	0.0575758	330	0.132937	0.949635	1.77607
Pv2.1_10_42931001	Pv010	42931001	Pv2.1_10_42931001_G/T	G	T	0.0525247	0.0575758	330	0.132937	0.949635	-1.77607
Pv2.1_06_21601960	Pv06	21601960	Pv2.1_06_21601960_G/A	G	A	0.052671	0.218182	330	0.132925	0.949635	-0.997481
Pv2.1_10_40111828	Pv010	40111828	Pv2.1_10_40111828_G/C	G	C	0.0526828	0.298485	330	0.132924	0.949635	1.21471
Pv2.1_08_792876	Pv08	792876	Pv2.1_08_792876_T/C	T	C	0.052743	0.256061	330	0.132918	0.949635	-0.983995
Pv2.1_07_29104195	Pv07	29104195	Pv2.1_07_29104195_G/T	G	T	0.0527907	0.0651515	330	0.132914	0.949635	1.8138
Pv2.1_03_45934276	Pv03	45934276	Pv2.1_03_45934276_T/C	T	C	0.0528311	0.0666667	330	0.132911	0.949635	1.81709
Pv2.1_10_39234824	Pv010	39234824	Pv2.1_10_39234824_C/T	C	T	0.0528358	0.322727	330	0.13291	0.949635	-1.17471
Pv2.1_03_1964762	Pv03	1964762	Pv2.1_03_1964762_A/G	A	G	0.0528778	0.0530303	330	0.132907	0.949635	2.18463
Pv2.1_04_4342356	Pv04	4342356	Pv2.1_04_4342356_T/A	T	A	0.0529571	0.178788	330	0.1329	0.949635	-1.07153
Pv2.1_07_956006	Pv07	956006	Pv2.1_07_956006_G/T	G	T	0.0530263	0.109091	330	0.132894	0.949635	-1.59734
Pv2.1_02_2739945	Pv02	2739945	Pv2.1_02_2739945_G/C	G	C	0.0532298	0.154545	330	0.132877	0.950631	-1.72415
Pv2.1_07_1182132	Pv07	1182132	Pv2.1_07_1182132_A/G	A	G	0.0533866	0.0378788	330	0.132863	0.950631	2.33182
Pv2.1_11_38172960	Pv011	38172960	Pv2.1_11_38172960_G/A	G	A	0.0533972	0.0666667	330	0.132862	0.950631	1.89947
Pv2.1_03_44807968	Pv03	44807968	Pv2.1_03_44807968_G/A	G	A	0.0534856	0.172727	330	0.132855	0.950631	1.44338
Pv2.1_02_41978116	Pv02	41978116	Pv2.1_02_41978116_T/A	T	A	0.0537857	0.3	330	0.132829	0.954165	1.3825
Pv2.1_06_21948635	Pv06	21948635	Pv2.1_06_21948635_C/T	C	T	0.0539196	0.0636364	330	0.132818	0.954741	1.8477
Pv2.1_07_5442926	Pv07	5442926	Pv2.1_07_5442926_A/G	A	G	0.0540662	0.0742424	330	0.132805	0.955541	2.4994
Pv2.1_11_1163870	Pv011	1163870	Pv2.1_11_1163870_A/G	A	G	0.0543989	0.14697	330	0.132777	0.958692	1.44122
Pv2.1_06_20364075	Pv06	20364075	Pv2.1_06_20364075_T/C	T	C	0.054448	0.163636	330	0.132773	0.958692	1.46239
Pv2.1_02_31921908	Pv02	31921908	Pv2.1_02_31921908_C/T	C	T	0.0546941	0.160606	330	0.132753	0.960163	-1.30591
Pv2.1_07_4952125	Pv07	4952125	Pv2.1_07_4952125_C/T	C	T	0.0547354	0.0878788	330	0.132749	0.960163	2.20205
Pv2.1_01_51209207	Pv01	51209207	Pv2.1_01_51209207_G/A	G	A	0.0549972	0.0287879	330	0.132727	0.960493	2.522
Pv2.1_08_6230633	Pv08	6230633	Pv2.1_08_6230633_C/T	C	T	0.0551403	0.148485	330	0.132716	0.960493	1.43843
Pv2.1_02_48545931	Pv02	48545931	Pv2.1_02_48545931_T/C	T	C	0.055162	0.498485	330	0.132714	0.960493	-1.10681
Pv2.1_04_46972988	Pv04	46972988	Pv2.1_04_46972988_C/T	C	T	0.0551871	0.125758	330	0.132712	0.960493	1.41771
Pv2.1_09_12105394	Pv09	12105394	Pv2.1_09_12105394_T/A	T	A	0.0553793	0.0621212	330	0.132696	0.960493	-2.06121
Pv2.1_05_38383651	Pv05	38383651	Pv2.1_05_38383651_C/T	C	T	0.0554331	0.472727	330	0.132691	0.960493	1.05806
Pv2.1_05_11311383	Pv05	11311383	Pv2.1_05_11311383_T/A	T	A	0.055468	0.0833333	330	0.132689	0.960493	2.01524
Pv2.1_04_3787280	Pv04	3787280	Pv2.1_04_3787280_A/T	A	T	0.0556514	0.0666667	330	0.132674	0.961901	1.98567
Pv2.1_02_31777826	Pv02	31777826	Pv2.1_02_31777826_G/C	G	C	0.0557667	0.136364	330	0.132664	0.962129	-1.64013
Pv2.1_09_9683717	Pv09	9683717	Pv2.1_09_9683717_T/C	T	C	0.0560339	0.0287879	330	0.132642	0.964971	-2.68287
Pv2.1_02_13735938	Pv02	13735938	Pv2.1_02_13735938_A/G	A	G	0.0561798	0.124242	330	0.13263	0.965718	-1.48831
Pv2.1_02_3562724	Pv02	3562724	Pv2.1_02_3562724_T/C	T	C	0.0563232	0.0939394	330	0.132619	0.96642	-1.68087
Pv2.1_05_152546	Pv05	152546	Pv2.1_05_152546_A/C	A	C	0.0572218	0.201515	330	0.132547	0.967312	-1.19078
Pv2.1_07_643482	Pv07	643482	Pv2.1_07_643482_A/G	A	G	0.0574931	0.125758	330	0.132525	0.967312	-1.89106
Pv2.1_09_37626802	Pv09	37626802	Pv2.1_09_37626802_G/A	G	A	0.0575838	0.080303	330	0.132518	0.967312	1.54189
Pv2.1_05_6768524	Pv05	6768524	Pv2.1_05_6768524_T/G	T	G	0.057641	0.0469697	330	0.132514	0.967312	2.40302
Pv2.1_02_2433893	Pv02	2433893	Pv2.1_02_2433893_A/T	A	T	0.05768	0.251515	330	0.132511	0.967312	1.21421
Pv2.1_03_45934237	Pv03	45934237	Pv2.1_03_45934237_T/C	T	C	0.057719	0.0606061	330	0.132508	0.967312	1.88418
Pv2.1_10_42388033	Pv010	42388033	Pv2.1_10_42388033_A/T	A	T	0.0580125	0.104545	330	0.132484	0.967312	1.66371
Pv2.1_02_2571375	Pv02	2571375	Pv2.1_02_2571375_T/G	T	G	0.0580166	0.145455	330	0.132484	0.967312	-1.52932
Pv2.1_04_5395370	Pv04	5395370	Pv2.1_04_5395370_T/C	T	C	0.0582292	0.178788	330	0.132468	0.967312	-1.54111
Pv2.1_04_5395401	Pv04	5395401	Pv2.1_04_5395401_G/A	G	A	0.0582292	0.178788	330	0.132468	0.967312	-1.54111
Pv2.1_10_42533705	Pv010	42533705	Pv2.1_10_42533705_A/G	A	G	0.0582394	0.134848	330	0.132467	0.967312	-1.39829
Pv2.1_03_41377702	Pv03	41377702	Pv2.1_03_41377702_T/C	T	C	0.0583428	0.228788	330	0.132459	0.967312	-1.20715
Pv2.1_07_4755422	Pv07	4755422	Pv2.1_07_4755422_A/G	A	G	0.0583711	0.218182	330	0.132456	0.967312	1.73346
Pv2.1_01_49329764	Pv01	49329764	Pv2.1_01_49329764_C/G	C	G	0.0584258	0.209091	330	0.132452	0.967312	1.56478
Pv2.1_02_48637179	Pv02	48637179	Pv2.1_02_48637179_C/T	C	T	0.0584581	0.486364	330	0.13245	0.967312	1.03223
Pv2.1_04_46176787	Pv04	46176787	Pv2.1_04_46176787_G/A	G	A	0.0585421	0.19697	330	0.132443	0.967312	-1.26537
Pv2.1_03_40856577	Pv03	40856577	Pv2.1_03_40856577_A/C	A	C	0.0585686	0.0939394	330	0.132441	0.967312	1.40021
Pv2.1_07_28490080	Pv07	28490080	Pv2.1_07_28490080_C/G	C	G	0.0586943	0.139394	330	0.132431	0.967312	1.54076
Pv2.1_09_12073663	Pv09	12073663	Pv2.1_09_12073663_T/C	T	C	0.058769	0.118182	330	0.132426	0.967312	-1.83071
Pv2.1_03_5522907	Pv03	5522907	Pv2.1_03_5522907_G/A	G	A	0.0588552	0.109091	330	0.132419	0.967312	1.4632
Pv2.1_04_2409563	Pv04	2409563	Pv2.1_04_2409563_T/A	T	A	0.0589519	0.337879	330	0.132412	0.967312	-0.962213
Pv2.1_01_46355138	Pv01	46355138	Pv2.1_01_46355138_T/C	T	C	0.058952	0.0681818	330	0.132412	0.967312	2.94202
Pv2.1_09_15961251	Pv09	15961251	Pv2.1_09_15961251_G/A	G	A	0.0590519	0.0424242	330	0.132404	0.967312	-1.93382
Pv2.1_10_1562923	Pv010	1562923	Pv2.1_10_1562923_C/G	C	G	0.0591181	0.154545	330	0.132399	0.967312	1.34213
Pv2.1_06_19949381	Pv06	19949381	Pv2.1_06_19949381_A/T	A	T	0.059444	0.0681818	330	0.132374	0.967312	-1.49932
Pv2.1_05_3025982	Pv05	3025982	Pv2.1_05_3025982_G/C	G	C	0.0595682	0.0469697	330	0.132364	0.967312	-1.80238
Pv2.1_02_3650401	Pv02	3650401	Pv2.1_02_3650401_G/A	G	A	0.0596134	0.0833333	330	0.132361	0.967312	-1.57896
Pv2.1_05_1062441	Pv05	1062441	Pv2.1_05_1062441_C/A	C	A	0.0596498	0.186364	330	0.132358	0.967312	-1.1781
Pv2.1_07_39936412	Pv07	39936412	Pv2.1_07_39936412_T/C	T	C	0.0597978	0.183333	330	0.132347	0.967312	-1.65565
Pv2.1_02_30952145	Pv02	30952145	Pv2.1_02_30952145_C/T	C	T	0.0600207	0.110606	330	0.13233	0.967312	-1.21137
Pv2.1_03_52320829	Pv03	52320829	Pv2.1_03_52320829_C/T	C	T	0.0602519	0.107576	330	0.132313	0.967312	1.57286
Pv2.1_02_24609549	Pv02	24609549	Pv2.1_02_24609549_T/C	T	C	0.0603341	0.128788	330	0.132306	0.967312	1.575
Pv2.1_03_51355666	Pv03	51355666	Pv2.1_03_51355666_C/T	C	T	0.0603379	0.266667	330	0.132306	0.967312	-1.14259
Pv2.1_11_1163864	Pv011	1163864	Pv2.1_11_1163864_A/G	A	G	0.0603753	0.145455	330	0.132303	0.967312	1.44601
Pv2.1_07_2401444	Pv07	2401444	Pv2.1_07_2401444_C/T	C	T	0.0605592	0.106061	330	0.13229	0.967312	-1.99009
Pv2.1_02_24370930	Pv02	24370930	Pv2.1_02_24370930_T/G	T	G	0.0605882	0.0666667	330	0.132287	0.967312	1.95639
Pv2.1_02_2433890	Pv02	2433890	Pv2.1_02_2433890_T/C	T	C	0.0606757	0.25303	330	0.132281	0.967312	-1.18567
Pv2.1_07_3048201	Pv07	3048201	Pv2.1_07_3048201_A/G	A	G	0.0607713	0.225758	330	0.132274	0.967312	-1.68864
Pv2.1_03_3166170	Pv03	3166170	Pv2.1_03_3166170_T/C	T	C	0.0608599	0.107576	330	0.132267	0.967312	-1.66766
Pv2.1_08_61266513	Pv08	61266513	Pv2.1_08_61266513_T/C	T	C	0.0608652	0.206061	330	0.132267	0.967312	-1.37947
Pv2.1_08_59752403	Pv08	59752403	Pv2.1_08_59752403_A/C	A	C	0.060868	0.178788	330	0.132267	0.967312	1.54102
Pv2.1_04_32421298	Pv04	32421298	Pv2.1_04_32421298_C/G	C	G	0.0609566	0.113636	330	0.13226	0.967312	2.03276
Pv2.1_02_30738330	Pv02	30738330	Pv2.1_02_30738330_A/G	A	G	0.0610496	0.0621212	330	0.132253	0.967312	-1.96226
Pv2.1_03_42523445	Pv03	42523445	Pv2.1_03_42523445_A/G	A	G	0.0612341	0.175758	330	0.132239	0.967312	1.33433
Pv2.1_07_3919560	Pv07	3919560	Pv2.1_07_3919560_C/G	C	G	0.0616632	0.480303	330	0.132208	0.967312	-1.06614
Pv2.1_10_42039002	Pv010	42039002	Pv2.1_10_42039002_T/C	T	C	0.0616749	0.128788	330	0.132207	0.967312	-1.40948
Pv2.1_10_4811712	Pv010	4811712	Pv2.1_10_4811712_A/C	A	C	0.0618129	0.248485	330	0.132197	0.967312	-1.15317
Pv2.1_03_52663203	Pv03	52663203	Pv2.1_03_52663203_A/G	A	G	0.0618878	0.10303	330	0.132191	0.967312	1.52752
Pv2.1_02_3953716	Pv02	3953716	Pv2.1_02_3953716_C/T	C	T	0.0619119	0.0878788	330	0.13219	0.967312	1.58999
Pv2.1_03_41092800	Pv03	41092800	Pv2.1_03_41092800_T/G	T	G	0.0620807	0.416667	330	0.132177	0.967312	-0.893053
Pv2.1_02_47965288	Pv02	47965288	Pv2.1_02_47965288_A/G	A	G	0.0621684	0.130303	330	0.132171	0.967312	1.48483
Pv2.1_02_23938990	Pv02	23938990	Pv2.1_02_23938990_T/C	T	C	0.0621915	0.0606061	330	0.132169	0.967312	2.01176
Pv2.1_02_43442391	Pv02	43442391	Pv2.1_02_43442391_C/T	C	T	0.0623616	0.240909	330	0.132157	0.967312	-1.5385
Pv2.1_02_46033982	Pv02	46033982	Pv2.1_02_46033982_T/C	T	C	0.0624142	0.127273	330	0.132153	0.967312	1.8175
Pv2.1_07_4141488	Pv07	4141488	Pv2.1_07_4141488_G/A	G	A	0.0624911	0.486364	330	0.132147	0.967312	1.0269
Pv2.1_08_2030014	Pv08	2030014	Pv2.1_08_2030014_T/C	T	C	0.0625066	0.0848485	330	0.132146	0.967312	1.4051
Pv2.1_08_59115660	Pv08	59115660	Pv2.1_08_59115660_A/C	A	C	0.0625258	0.151515	330	0.132145	0.967312	1.46675
Pv2.1_07_35568680	Pv07	35568680	Pv2.1_07_35568680_A/G	A	G	0.0625418	0.184848	330	0.132144	0.967312	-1.84177
Pv2.1_08_62053672	Pv08	62053672	Pv2.1_08_62053672_A/G	A	G	0.063137	0.439394	330	0.132101	0.967312	-1.10089
Pv2.1_10_40054869	Pv010	40054869	Pv2.1_10_40054869_T/A	T	A	0.063325	0.298485	330	0.132088	0.967312	1.2722
Pv2.1_10_39753264	Pv010	39753264	Pv2.1_10_39753264_G/T	G	T	0.0633253	0.318182	330	0.132088	0.967312	-1.23358
Pv2.1_02_2887051	Pv02	2887051	Pv2.1_02_2887051_A/T	A	T	0.0633315	0.210606	330	0.132087	0.967312	1.38477
Pv2.1_05_33436448	Pv05	33436448	Pv2.1_05_33436448_G/A	G	A	0.0633342	0.354545	330	0.132087	0.967312	1.06128
Pv2.1_02_11948747	Pv02	11948747	Pv2.1_02_11948747_T/C	T	C	0.0633905	0.218182	330	0.132083	0.967312	1.329
Pv2.1_02_45042803	Pv02	45042803	Pv2.1_02_45042803_G/A	G	A	0.0634808	0.221212	330	0.132076	0.967312	1.23347
Pv2.1_04_43411148	Pv04	43411148	Pv2.1_04_43411148_T/G	T	G	0.0636446	0.142424	330	0.132065	0.967312	1.84181
Pv2.1_03_41652582	Pv03	41652582	Pv2.1_03_41652582_C/T	C	T	0.0638889	0.3	330	0.132048	0.967312	-1.15375
Pv2.1_05_7209788	Pv05	7209788	Pv2.1_05_7209788_A/G	A	G	0.0639565	0.0530303	330	0.132043	0.967312	-2.32752
Pv2.1_10_3050708	Pv010	3050708	Pv2.1_10_3050708_T/C	T	C	0.0640817	0.254545	330	0.132034	0.967312	-0.878445
Pv2.1_05_16716372	Pv05	16716372	Pv2.1_05_16716372_A/T	A	T	0.0642197	0.174242	330	0.132024	0.967312	1.50215
Pv2.1_01_50878660	Pv01	50878660	Pv2.1_01_50878660_T/C	T	C	0.0646265	0.0590909	330	0.131996	0.967312	2.11495
Pv2.1_10_36446806	Pv010	36446806	Pv2.1_10_36446806_C/G	C	G	0.0646325	0.0621212	330	0.131995	0.967312	-1.87836
Pv2.1_10_2866336	Pv010	2866336	Pv2.1_10_2866336_G/C	G	C	0.0648369	0.286364	330	0.131981	0.967312	-0.947741
Pv2.1_10_42388062	Pv010	42388062	Pv2.1_10_42388062_C/A	C	A	0.0649372	0.101515	330	0.131974	0.967312	-1.55679
Pv2.1_10_41922512	Pv010	41922512	Pv2.1_10_41922512_C/T	C	T	0.0649607	0.134848	330	0.131972	0.967312	1.45325
Pv2.1_10_42515121	Pv010	42515121	Pv2.1_10_42515121_G/T	G	T	0.0650406	0.15	330	0.131967	0.967312	-1.46762
Pv2.1_01_46237887	Pv01	46237887	Pv2.1_01_46237887_T/A	T	A	0.0652152	0.0439394	330	0.131955	0.967312	2.58786
Pv2.1_07_3919674	Pv07	3919674	Pv2.1_07_3919674_A/G	A	G	0.0652196	0.375758	330	0.131955	0.967312	0.918338
Pv2.1_07_5314441	Pv07	5314441	Pv2.1_07_5314441_T/C	T	C	0.0655159	0.080303	330	0.131934	0.967312	-2.31637
Pv2.1_08_60583858	Pv08	60583858	Pv2.1_08_60583858_C/A	C	A	0.0656907	0.165152	330	0.131922	0.967312	-1.28507
Pv2.1_04_44385343	Pv04	44385343	Pv2.1_04_44385343_T/A	T	A	0.0656959	0.181818	330	0.131922	0.967312	-1.30093
Pv2.1_07_1881175	Pv07	1881175	Pv2.1_07_1881175_A/G	A	G	0.065794	0.119697	330	0.131915	0.967312	2.08704
Pv2.1_09_29311106	Pv09	29311106	Pv2.1_09_29311106_T/C	T	C	0.0659726	0.124242	330	0.131903	0.967312	-1.18171
Pv2.1_07_1860309	Pv07	1860309	Pv2.1_07_1860309_G/A	G	A	0.0660341	0.119697	330	0.131899	0.967312	-1.79413
Pv2.1_09_12846261	Pv09	12846261	Pv2.1_09_12846261_T/A	T	A	0.0660491	0.137879	330	0.131898	0.967312	-1.62224
Pv2.1_10_41264777	Pv010	41264777	Pv2.1_10_41264777_T/C	T	C	0.0661427	0.210606	330	0.131891	0.967312	1.11679
Pv2.1_02_24738138	Pv02	24738138	Pv2.1_02_24738138_C/A	C	A	0.0661557	0.0984848	330	0.13189	0.967312	-1.72673
Pv2.1_04_45501783	Pv04	45501783	Pv2.1_04_45501783_C/G	C	G	0.0663147	0.145455	330	0.13188	0.967312	1.50869
Pv2.1_03_2929498	Pv03	2929498	Pv2.1_03_2929498_A/G	A	G	0.0665029	0.0363636	330	0.131867	0.967312	2.31974
Pv2.1_10_42270697	Pv010	42270697	Pv2.1_10_42270697_G/A	G	A	0.0665813	0.20303	330	0.131862	0.967312	-1.40662
Pv2.1_07_5830879	Pv07	5830879	Pv2.1_07_5830879_C/A	C	A	0.0666212	0.137879	330	0.131859	0.967312	-1.65575
Pv2.1_07_36141039	Pv07	36141039	Pv2.1_07_36141039_G/A	G	A	0.0666523	0.168182	330	0.131857	0.967312	1.72453
Pv2.1_11_29949065	Pv011	29949065	Pv2.1_11_29949065_T/C	T	C	0.0666987	0.069697	330	0.131854	0.967312	1.8372
Pv2.1_07_36385041	Pv07	36385041	Pv2.1_07_36385041_G/A	G	A	0.0668649	0.486364	330	0.131842	0.967312	0.880078
Pv2.1_03_51355574	Pv03	51355574	Pv2.1_03_51355574_G/A	G	A	0.0669298	0.166667	330	0.131838	0.967312	-1.41794
Pv2.1_10_42388029	Pv010	42388029	Pv2.1_10_42388029_C/T	C	T	0.0669887	0.10303	330	0.131834	0.967312	1.56178
Pv2.1_02_49026329	Pv02	49026329	Pv2.1_02_49026329_A/G	A	G	0.0671556	0.233333	330	0.131823	0.967312	-1.15039
Pv2.1_05_36652653	Pv05	36652653	Pv2.1_05_36652653_A/T	A	T	0.0672121	0.416667	330	0.131819	0.967312	1.04027
Pv2.1_08_2154504	Pv08	2154504	Pv2.1_08_2154504_T/C	T	C	0.0673061	0.101515	330	0.131813	0.967312	1.40591
Pv2.1_04_2390776	Pv04	2390776	Pv2.1_04_2390776_A/G	A	G	0.0675167	0.190909	330	0.131799	0.967312	-1.5788
Pv2.1_04_45977613	Pv04	45977613	Pv2.1_04_45977613_T/C	T	C	0.0675205	0.277273	330	0.131799	0.967312	-1.01072
Pv2.1_02_3943688	Pv02	3943688	Pv2.1_02_3943688_G/A	G	A	0.0676289	0.0878788	330	0.131791	0.967312	-1.66098
Pv2.1_05_7376184	Pv05	7376184	Pv2.1_05_7376184_T/A	T	A	0.0676571	0.157576	330	0.131789	0.967312	1.48989
Pv2.1_02_49095492	Pv02	49095492	Pv2.1_02_49095492_C/T	C	T	0.0676632	0.301515	330	0.131789	0.967312	-1.16456
Pv2.1_02_12114572	Pv02	12114572	Pv2.1_02_12114572_C/A	C	A	0.0677533	0.0590909	330	0.131783	0.967312	2.33173
Pv2.1_02_43564492	Pv02	43564492	Pv2.1_02_43564492_C/T	C	T	0.0678388	0.201515	330	0.131777	0.967312	-1.70932
Pv2.1_02_49017671	Pv02	49017671	Pv2.1_02_49017671_G/A	G	A	0.0678489	0.0666667	330	0.131777	0.967312	1.92221
Pv2.1_10_41198837	Pv010	41198837	Pv2.1_10_41198837_G/A	G	A	0.0678875	0.142424	330	0.131774	0.967312	1.18544
Pv2.1_02_44324140	Pv02	44324140	Pv2.1_02_44324140_A/T	A	T	0.0681001	0.166667	330	0.13176	0.967312	-1.73595
Pv2.1_04_45501837	Pv04	45501837	Pv2.1_04_45501837_T/C	T	C	0.0681219	0.304545	330	0.131759	0.967312	1.28535
Pv2.1_02_48577502	Pv02	48577502	Pv2.1_02_48577502_G/A	G	A	0.0681564	0.478788	330	0.131756	0.967312	-0.988024
Pv2.1_04_152546	Pv04	152546	Pv2.1_04_152546_G/C	G	C	0.0681626	0.431818	330	0.131756	0.967312	-0.875925
Pv2.1_08_59882091	Pv08	59882091	Pv2.1_08_59882091_G/A	G	A	0.0681773	0.0727273	330	0.131755	0.967312	-2.10922
Pv2.1_04_45482223	Pv04	45482223	Pv2.1_04_45482223_C/T	C	T	0.0683732	0.459091	330	0.131742	0.967312	-0.943284
Pv2.1_01_50086031	Pv01	50086031	Pv2.1_01_50086031_A/G	A	G	0.0685589	0.109091	330	0.13173	0.967312	1.45254
Pv2.1_07_38986906	Pv07	38986906	Pv2.1_07_38986906_G/T	G	T	0.068567	0.265152	330	0.131729	0.967312	0.99891
Pv2.1_08_62753903	Pv08	62753903	Pv2.1_08_62753903_A/T	A	T	0.0688193	0.268182	330	0.131713	0.967312	-1.09267
Pv2.1_04_41855345	Pv04	41855345	Pv2.1_04_41855345_A/G	A	G	0.0689182	0.181818	330	0.131706	0.967312	-1.53453
Pv2.1_07_5705257	Pv07	5705257	Pv2.1_07_5705257_T/C	T	C	0.0689818	0.0833333	330	0.131702	0.967312	-2.17102
Pv2.1_03_39816172	Pv03	39816172	Pv2.1_03_39816172_A/T	A	T	0.0691566	0.19697	330	0.131691	0.967312	-1.31424
Pv2.1_07_2893233	Pv07	2893233	Pv2.1_07_2893233_C/T	C	T	0.0691991	0.137879	330	0.131688	0.967312	-1.24785
Pv2.1_06_19584566	Pv06	19584566	Pv2.1_06_19584566_C/A	C	A	0.0697597	0.169697	330	0.131652	0.967312	-0.997011
Pv2.1_04_44385377	Pv04	44385377	Pv2.1_04_44385377_T/A	T	A	0.0697629	0.175758	330	0.131652	0.967312	-1.2168
Pv2.1_06_27111950	Pv06	27111950	Pv2.1_06_27111950_C/T	C	T	0.069837	0.1	330	0.131647	0.967312	-1.35996
Pv2.1_11_48904300	Pv011	48904300	Pv2.1_11_48904300_G/A	G	A	0.069846	0.0787879	330	0.131647	0.967312	-1.67937
Pv2.1_10_41908893	Pv010	41908893	Pv2.1_10_41908893_G/A	G	A	0.06994	0.242424	330	0.13164	0.967312	1.28519
Pv2.1_08_62276162	Pv08	62276162	Pv2.1_08_62276162_T/C	T	C	0.070003	0.165152	330	0.131636	0.967312	-1.35413
Pv2.1_04_45482225	Pv04	45482225	Pv2.1_04_45482225_A/T	A	T	0.0700432	0.459091	330	0.131634	0.967312	-0.956957
Pv2.1_02_3577183	Pv02	3577183	Pv2.1_02_3577183_A/G	A	G	0.0702056	0.113636	330	0.131623	0.967312	1.27666
Pv2.1_09_37626794	Pv09	37626794	Pv2.1_09_37626794_T/C	T	C	0.0702379	0.0833333	330	0.131621	0.967312	1.4859
Pv2.1_09_37626799	Pv09	37626799	Pv2.1_09_37626799_G/A	G	A	0.0702379	0.0833333	330	0.131621	0.967312	1.4859
Pv2.1_10_41922485	Pv010	41922485	Pv2.1_10_41922485_C/A	C	A	0.070374	0.133333	330	0.131613	0.967312	-1.44273
Pv2.1_03_50075315	Pv03	50075315	Pv2.1_03_50075315_T/G	T	G	0.0704654	0.407576	330	0.131607	0.967312	-0.85681
Pv2.1_07_4952028	Pv07	4952028	Pv2.1_07_4952028_C/T	C	T	0.0706925	0.0984848	330	0.131593	0.967312	2.17167
Pv2.1_10_39278678	Pv010	39278678	Pv2.1_10_39278678_C/G	C	G	0.0707164	0.342424	330	0.131591	0.967312	-1.08189
Pv2.1_02_12312631	Pv02	12312631	Pv2.1_02_12312631_C/A	C	A	0.0707685	0.0424242	330	0.131588	0.967312	2.43616
Pv2.1_03_3166161	Pv03	3166161	Pv2.1_03_3166161_A/G	A	G	0.0708407	0.109091	330	0.131583	0.967312	1.61427
Pv2.1_09_12073661	Pv09	12073661	Pv2.1_09_12073661_T/G	T	G	0.0710346	0.116667	330	0.131571	0.967312	-1.75501
Pv2.1_02_47302524	Pv02	47302524	Pv2.1_02_47302524_A/C	A	C	0.0711405	0.0575758	330	0.131564	0.967312	1.74222
Pv2.1_04_146608	Pv04	146608	Pv2.1_04_146608_A/G	A	G	0.0712122	0.159091	330	0.13156	0.967312	1.53432
Pv2.1_03_4012482	Pv03	4012482	Pv2.1_03_4012482_T/A	T	A	0.0712862	0.168182	330	0.131555	0.967312	-1.47151
Pv2.1_02_3797506	Pv02	3797506	Pv2.1_02_3797506_A/T	A	T	0.0714701	0.0969697	330	0.131544	0.967312	1.42264
Pv2.1_03_51884878	Pv03	51884878	Pv2.1_03_51884878_T/C	T	C	0.0717038	0.204545	330	0.131529	0.967312	-1.20079
Pv2.1_03_45924803	Pv03	45924803	Pv2.1_03_45924803_T/C	T	C	0.0719177	0.190909	330	0.131516	0.967312	-1.50827
Pv2.1_04_46100264	Pv04	46100264	Pv2.1_04_46100264_G/C	G	C	0.0721163	0.315152	330	0.131503	0.967312	-1.11308
Pv2.1_10_42270330	Pv010	42270330	Pv2.1_10_42270330_C/T	C	T	0.0721707	0.19697	330	0.1315	0.967312	1.37228
Pv2.1_01_49363070	Pv01	49363070	Pv2.1_01_49363070_A/T	A	T	0.0722658	0.118182	330	0.131494	0.967312	1.59468
Pv2.1_03_45105069	Pv03	45105069	Pv2.1_03_45105069_C/T	C	T	0.0725154	0.10303	330	0.131479	0.967312	-1.62348
Pv2.1_03_3443508	Pv03	3443508	Pv2.1_03_3443508_T/C	T	C	0.0725216	0.268182	330	0.131478	0.967312	1.14524
Pv2.1_03_1002794	Pv03	1002794	Pv2.1_03_1002794_G/T	G	T	0.0725273	0.175758	330	0.131478	0.967312	-1.70867
Pv2.1_02_49026312	Pv02	49026312	Pv2.1_02_49026312_G/C	G	C	0.0726203	0.243939	330	0.131472	0.967312	1.09902
Pv2.1_02_49514911	Pv02	49514911	Pv2.1_02_49514911_G/A	G	A	0.0727261	0.492424	330	0.131466	0.967312	0.947104
Pv2.1_10_42791961	Pv010	42791961	Pv2.1_10_42791961_T/C	T	C	0.072777	0.0863636	330	0.131462	0.967312	1.72509
Pv2.1_08_792879	Pv08	792879	Pv2.1_08_792879_A/T	A	T	0.0730377	0.245455	330	0.131447	0.967312	0.924845
Pv2.1_10_4811721	Pv010	4811721	Pv2.1_10_4811721_G/C	G	C	0.0730821	0.24697	330	0.131444	0.967312	1.13571
Pv2.1_10_4811709	Pv010	4811709	Pv2.1_10_4811709_C/G	C	G	0.0730821	0.24697	330	0.131444	0.967312	-1.13571
Pv2.1_07_645538	Pv07	645538	Pv2.1_07_645538_G/A	G	A	0.0731374	0.0393939	330	0.13144	0.967312	2.35093
Pv2.1_02_2514866	Pv02	2514866	Pv2.1_02_2514866_T/C	T	C	0.073319	0.159091	330	0.131429	0.967312	-1.52838
Pv2.1_11_384559	Pv011	384559	Pv2.1_11_384559_C/G	C	G	0.0734584	0.110606	330	0.131421	0.967312	1.49506
Pv2.1_11_384563	Pv011	384563	Pv2.1_11_384563_C/G	C	G	0.0734584	0.110606	330	0.131421	0.967312	1.49506
Pv2.1_03_46074945	Pv03	46074945	Pv2.1_03_46074945_C/A	C	A	0.0735142	0.0575758	330	0.131417	0.967312	-1.7146
Pv2.1_06_24415236	Pv06	24415236	Pv2.1_06_24415236_A/T	A	T	0.0737676	0.0621212	330	0.131402	0.967312	1.93238
Pv2.1_04_8324966	Pv04	8324966	Pv2.1_04_8324966_A/T	A	T	0.0737813	0.4	330	0.131401	0.967312	1.23959
Pv2.1_01_47260200	Pv01	47260200	Pv2.1_01_47260200_A/G	A	G	0.073847	0.104545	330	0.131397	0.967312	-1.81308
Pv2.1_08_59268224	Pv08	59268224	Pv2.1_08_59268224_T/C	T	C	0.0739235	0.201515	330	0.131393	0.967312	-1.15689
Pv2.1_04_45451468	Pv04	45451468	Pv2.1_04_45451468_T/A	T	A	0.0739699	0.0439394	330	0.13139	0.967312	-2.01531
Pv2.1_08_1091251	Pv08	1091251	Pv2.1_08_1091251_C/T	C	T	0.0740004	0.195455	330	0.131388	0.967312	-1.05622
Pv2.1_02_3626868	Pv02	3626868	Pv2.1_02_3626868_C/G	C	G	0.0741721	0.0848485	330	0.131378	0.967312	1.60958
Pv2.1_11_53133538	Pv011	53133538	Pv2.1_11_53133538_T/C	T	C	0.0742225	0.19697	330	0.131375	0.967312	1.23236
Pv2.1_02_40842994	Pv02	40842994	Pv2.1_02_40842994_G/C	G	C	0.0742926	0.475758	330	0.13137	0.967312	-0.879896
Pv2.1_02_49017734	Pv02	49017734	Pv2.1_02_49017734_A/T	A	T	0.0744147	0.0757576	330	0.131363	0.967312	-1.81174
Pv2.1_02_24954294	Pv02	24954294	Pv2.1_02_24954294_A/G	A	G	0.0745821	0.0909091	330	0.131353	0.967312	1.55433
Pv2.1_11_46186715	Pv011	46186715	Pv2.1_11_46186715_A/G	A	G	0.0745861	0.439394	330	0.131353	0.967312	1.05458
Pv2.1_02_44860249	Pv02	44860249	Pv2.1_02_44860249_T/C	T	C	0.0749753	0.287879	330	0.13133	0.967312	1.21583
Pv2.1_02_43893276	Pv02	43893276	Pv2.1_02_43893276_C/T	C	T	0.0749774	0.265152	330	0.13133	0.967312	-1.36574
Pv2.1_04_30830228	Pv04	30830228	Pv2.1_04_30830228_C/A	C	A	0.0749776	0.0287879	330	0.131329	0.967312	2.79
Pv2.1_02_13736023	Pv02	13736023	Pv2.1_02_13736023_C/T	C	T	0.0751229	0.125758	330	0.131321	0.967312	-1.60498
Pv2.1_04_5395414	Pv04	5395414	Pv2.1_04_5395414_T/C	T	C	0.0751798	0.195455	330	0.131317	0.967312	-1.35675
Pv2.1_02_47302501	Pv02	47302501	Pv2.1_02_47302501_C/T	C	T	0.0751841	0.0575758	330	0.131317	0.967312	1.79316
Pv2.1_08_59981982	Pv08	59981982	Pv2.1_08_59981982_T/C	T	C	0.0754364	0.178788	330	0.131302	0.967312	-1.45281
Pv2.1_07_27258611	Pv07	27258611	Pv2.1_07_27258611_C/T	C	T	0.0756043	0.0439394	330	0.131292	0.967312	-2.29722
Pv2.1_05_40623452	Pv05	40623452	Pv2.1_05_40623452_G/A	G	A	0.0756945	0.0378788	330	0.131287	0.967312	1.8761
Pv2.1_06_28493119	Pv06	28493119	Pv2.1_06_28493119_C/A	C	A	0.0758903	0.0439394	330	0.131276	0.967312	2.08642
Pv2.1_07_24711225	Pv07	24711225	Pv2.1_07_24711225_G/A	G	A	0.0759389	0.219697	330	0.131273	0.967312	-1.07082
Pv2.1_02_44689964	Pv02	44689964	Pv2.1_02_44689964_C/T	C	T	0.0761659	0.213636	330	0.131259	0.967312	-1.49619
Pv2.1_02_24738147	Pv02	24738147	Pv2.1_02_24738147_A/T	A	T	0.0763182	0.101515	330	0.131251	0.967312	1.68587
Pv2.1_03_3462491	Pv03	3462491	Pv2.1_03_3462491_C/T	C	T	0.0763236	0.190909	330	0.13125	0.967312	-1.0751
Pv2.1_05_36094930	Pv05	36094930	Pv2.1_05_36094930_T/A	T	A	0.0763333	0.313636	330	0.13125	0.967312	-0.963357
Pv2.1_02_47571692	Pv02	47571692	Pv2.1_02_47571692_C/T	C	T	0.0763348	0.0727273	330	0.13125	0.967312	-1.79061
Pv2.1_05_7576984	Pv05	7576984	Pv2.1_05_7576984_C/T	C	T	0.0763378	0.104545	330	0.131249	0.967312	1.34716
Pv2.1_08_59981981	Pv08	59981981	Pv2.1_08_59981981_G/T	G	T	0.076403	0.175758	330	0.131246	0.967312	1.45178
Pv2.1_08_59981977	Pv08	59981977	Pv2.1_08_59981977_T/A	T	A	0.076403	0.175758	330	0.131246	0.967312	-1.45178
Pv2.1_04_47575738	Pv04	47575738	Pv2.1_04_47575738_C/T	C	T	0.0764902	0.130303	330	0.13124	0.967312	1.12697
Pv2.1_11_384568	Pv011	384568	Pv2.1_11_384568_T/G	T	G	0.0765879	0.110606	330	0.131235	0.967312	-1.53557
Pv2.1_04_46001791	Pv04	46001791	Pv2.1_04_46001791_C/A	C	A	0.076599	0.415152	330	0.131234	0.967312	0.940868
Pv2.1_09_9062887	Pv09	9062887	Pv2.1_09_9062887_T/C	T	C	0.0766737	0.0424242	330	0.13123	0.967312	-2.27057
Pv2.1_02_288202	Pv02	288202	Pv2.1_02_288202_C/G	C	G	0.0767091	0.145455	330	0.131228	0.967312	-1.28847
Pv2.1_08_2007789	Pv08	2007789	Pv2.1_08_2007789_T/C	T	C	0.0767311	0.107576	330	0.131227	0.967312	1.24096
Pv2.1_11_46186748	Pv011	46186748	Pv2.1_11_46186748_T/G	T	G	0.0768099	0.434848	330	0.131222	0.967312	-1.07754
Pv2.1_08_62753875	Pv08	62753875	Pv2.1_08_62753875_A/G	A	G	0.0769412	0.268182	330	0.131214	0.967672	-1.07308
Pv2.1_02_4180546	Pv02	4180546	Pv2.1_02_4180546_G/A	G	A	0.077074	0.15303	330	0.131207	0.96805	-1.36545
Pv2.1_10_4628002	Pv010	4628002	Pv2.1_10_4628002_T/G	T	G	0.0773953	0.262121	330	0.131188	0.97079	1.182
Pv2.1_09_12073675	Pv09	12073675	Pv2.1_09_12073675_C/G	C	G	0.077586	0.115152	330	0.131177	0.971509	1.76649
Pv2.1_01_51131314	Pv01	51131314	Pv2.1_01_51131314_A/G	A	G	0.0776588	0.116667	330	0.131173	0.971509	1.28166
Pv2.1_02_13846242	Pv02	13846242	Pv2.1_02_13846242_A/G	A	G	0.0778875	0.119697	330	0.13116	0.973078	-1.63112
Pv2.1_07_25720053	Pv07	25720053	Pv2.1_07_25720053_T/C	T	C	0.0780968	0.0681818	330	0.131148	0.974186	2.12272
Pv2.1_08_61186503	Pv08	61186503	Pv2.1_08_61186503_T/A	T	A	0.0782758	0.412121	330	0.131138	0.974186	0.921556
Pv2.1_04_50980	Pv04	50980	Pv2.1_04_50980_T/A	T	A	0.0784101	0.392424	330	0.13113	0.974186	-0.958413
Pv2.1_07_1148853	Pv07	1148853	Pv2.1_07_1148853_T/C	T	C	0.0785078	0.0621212	330	0.131125	0.974186	-1.70303
Pv2.1_07_1881205	Pv07	1881205	Pv2.1_07_1881205_G/A	G	A	0.0785467	0.121212	330	0.131123	0.974186	1.89363
Pv2.1_02_3836975	Pv02	3836975	Pv2.1_02_3836975_C/T	C	T	0.078601	0.0818182	330	0.131119	0.974186	1.53187
Pv2.1_04_4342353	Pv04	4342353	Pv2.1_04_4342353_T/C	T	C	0.0787907	0.178788	330	0.131109	0.974186	-0.957825
Pv2.1_07_774147	Pv07	774147	Pv2.1_07_774147_C/T	C	T	0.0788036	0.0469697	330	0.131108	0.974186	-2.18404
Pv2.1_04_3787260	Pv04	3787260	Pv2.1_04_3787260_C/T	C	T	0.0789321	0.0727273	330	0.131101	0.974395	1.72626
Pv2.1_04_43299977	Pv04	43299977	Pv2.1_04_43299977_A/T	A	T	0.0793631	0.113636	330	0.131077	0.974395	1.87461
Pv2.1_09_8397269	Pv09	8397269	Pv2.1_09_8397269_C/T	C	T	0.0794063	0.0712121	330	0.131074	0.974395	1.92071
Pv2.1_09_11545045	Pv09	11545045	Pv2.1_09_11545045_A/T	A	T	0.0794531	0.0590909	330	0.131072	0.974395	1.6809
Pv2.1_10_4753654	Pv010	4753654	Pv2.1_10_4753654_C/T	C	T	0.0795206	0.2	330	0.131068	0.974395	-1.14379
Pv2.1_04_46032185	Pv04	46032185	Pv2.1_04_46032185_A/G	A	G	0.0795372	0.278788	330	0.131067	0.974395	1.17183
Pv2.1_10_42186131	Pv010	42186131	Pv2.1_10_42186131_C/A	C	A	0.0795445	0.143939	330	0.131066	0.974395	-1.35651
Pv2.1_03_53397898	Pv03	53397898	Pv2.1_03_53397898_A/G	A	G	0.0799881	0.0712121	330	0.131042	0.978174	-1.83351
Pv2.1_04_43299403	Pv04	43299403	Pv2.1_04_43299403_A/T	A	T	0.0800989	0.181818	330	0.131036	0.978174	1.85413
Pv2.1_04_41855347	Pv04	41855347	Pv2.1_04_41855347_G/A	G	A	0.0801646	0.180303	330	0.131032	0.978174	1.47918
Pv2.1_08_60121254	Pv08	60121254	Pv2.1_08_60121254_T/C	T	C	0.0806082	0.0984848	330	0.131008	0.980241	-1.58801
Pv2.1_01_49931355	Pv01	49931355	Pv2.1_01_49931355_T/C	T	C	0.0806146	0.156061	330	0.131007	0.980241	-1.59751
Pv2.1_07_38056131	Pv07	38056131	Pv2.1_07_38056131_C/A	C	A	0.0806462	0.112121	330	0.131005	0.980241	1.40454
Pv2.1_03_41422014	Pv03	41422014	Pv2.1_03_41422014_T/A	T	A	0.0811708	0.20303	330	0.130977	0.980813	1.03997
Pv2.1_07_39892288	Pv07	39892288	Pv2.1_07_39892288_C/G	C	G	0.0815618	0.148485	330	0.130955	0.980813	-1.19408
Pv2.1_03_40990038	Pv03	40990038	Pv2.1_03_40990038_G/A	G	A	0.0815878	0.230303	330	0.130954	0.980813	1.14511
Pv2.1_03_3462500	Pv03	3462500	Pv2.1_03_3462500_A/G	A	G	0.0816976	0.189394	330	0.130948	0.980813	-1.06949
Pv2.1_03_38735322	Pv03	38735322	Pv2.1_03_38735322_A/C	A	C	0.0819608	0.0954545	330	0.130934	0.980813	-1.53951
Pv2.1_03_41674075	Pv03	41674075	Pv2.1_03_41674075_G/C	G	C	0.0820104	0.29697	330	0.130931	0.980813	1.15628
Pv2.1_03_41674092	Pv03	41674092	Pv2.1_03_41674092_C/T	C	T	0.0820104	0.29697	330	0.130931	0.980813	-1.15628
Pv2.1_02_3626890	Pv02	3626890	Pv2.1_02_3626890_G/C	G	C	0.0822885	0.0863636	330	0.130916	0.980813	-1.56159
Pv2.1_02_44263170	Pv02	44263170	Pv2.1_02_44263170_G/A	G	A	0.0824107	0.171212	330	0.13091	0.980813	1.54513
Pv2.1_03_50951058	Pv03	50951058	Pv2.1_03_50951058_A/T	A	T	0.0824163	0.295455	330	0.130909	0.980813	-1.25318
Pv2.1_02_4371801	Pv02	4371801	Pv2.1_02_4371801_C/T	C	T	0.0824432	0.069697	330	0.130908	0.980813	1.77316
Pv2.1_08_62053794	Pv08	62053794	Pv2.1_08_62053794_G/C	G	C	0.0827021	0.437879	330	0.130894	0.980813	1.01536
Pv2.1_10_22669990	Pv010	22669990	Pv2.1_10_22669990_A/G	A	G	0.0827629	0.189394	330	0.130891	0.980813	-1.35358
Pv2.1_01_48803162	Pv01	48803162	Pv2.1_01_48803162_T/C	T	C	0.0833448	0.330303	330	0.13086	0.980813	-0.766446
Pv2.1_05_40656739	Pv05	40656739	Pv2.1_05_40656739_A/G	A	G	0.0833548	0.0818182	330	0.130859	0.980813	-1.553
Pv2.1_10_4906722	Pv010	4906722	Pv2.1_10_4906722_G/T	G	T	0.0833971	0.278788	330	0.130857	0.980813	-0.940066
Pv2.1_03_2589301	Pv03	2589301	Pv2.1_03_2589301_T/G	T	G	0.0834648	0.0560606	330	0.130853	0.980813	-1.83968
Pv2.1_07_39816199	Pv07	39816199	Pv2.1_07_39816199_A/G	A	G	0.0835522	0.301515	330	0.130849	0.980813	1.1168
Pv2.1_11_45478956	Pv011	45478956	Pv2.1_11_45478956_C/T	C	T	0.0836826	0.101515	330	0.130842	0.980813	1.56424
Pv2.1_02_48416853	Pv02	48416853	Pv2.1_02_48416853_G/C	G	C	0.08386	0.422727	330	0.130833	0.980813	-1.08637
Pv2.1_07_39372440	Pv07	39372440	Pv2.1_07_39372440_G/A	G	A	0.0838909	0.477273	330	0.130831	0.980813	-0.988845
Pv2.1_06_20364033	Pv06	20364033	Pv2.1_06_20364033_G/C	G	C	0.083959	0.162121	330	0.130827	0.980813	1.3243
Pv2.1_01_51029053	Pv01	51029053	Pv2.1_01_51029053_T/A	T	A	0.0842089	0.0636364	330	0.130814	0.980813	-1.74283
Pv2.1_08_706932	Pv08	706932	Pv2.1_08_706932_G/A	G	A	0.0842902	0.301515	330	0.13081	0.980813	-1.00299
Pv2.1_07_39131187	Pv07	39131187	Pv2.1_07_39131187_T/G	T	G	0.0843095	0.2	330	0.130809	0.980813	-1.28648
Pv2.1_05_34850823	Pv05	34850823	Pv2.1_05_34850823_C/T	C	T	0.0844352	0.318182	330	0.130802	0.980813	-1.05056
Pv2.1_03_51914965	Pv03	51914965	Pv2.1_03_51914965_C/G	C	G	0.0844791	0.219697	330	0.1308	0.980813	1.36412
Pv2.1_03_42120363	Pv03	42120363	Pv2.1_03_42120363_C/T	C	T	0.0844792	0.306061	330	0.1308	0.980813	0.961574
Pv2.1_11_1173912	Pv011	1173912	Pv2.1_11_1173912_A/G	A	G	0.0847307	0.0530303	330	0.130787	0.980813	1.84615
Pv2.1_08_5534905	Pv08	5534905	Pv2.1_08_5534905_G/A	G	A	0.0847752	0.218182	330	0.130785	0.980813	0.961186
Pv2.1_04_44878732	Pv04	44878732	Pv2.1_04_44878732_A/G	A	G	0.0847836	0.259091	330	0.130784	0.980813	1.2843
Pv2.1_11_50054854	Pv011	50054854	Pv2.1_11_50054854_G/A	G	A	0.0848065	0.234848	330	0.130783	0.980813	-1.19574
Pv2.1_03_53397894	Pv03	53397894	Pv2.1_03_53397894_C/T	C	T	0.0849538	0.069697	330	0.130775	0.980813	-1.785
Pv2.1_03_45924785	Pv03	45924785	Pv2.1_03_45924785_C/T	C	T	0.0849824	0.187879	330	0.130774	0.980813	1.45979
Pv2.1_05_36094939	Pv05	36094939	Pv2.1_05_36094939_C/T	C	T	0.0851143	0.313636	330	0.130767	0.980813	0.938173
Pv2.1_04_5395345	Pv04	5395345	Pv2.1_04_5395345_T/A	T	A	0.0852272	0.212121	330	0.130761	0.980813	-1.24864
Pv2.1_03_4936091	Pv03	4936091	Pv2.1_03_4936091_G/A	G	A	0.0854204	0.0909091	330	0.130751	0.980813	1.76025
Pv2.1_03_51493628	Pv03	51493628	Pv2.1_03_51493628_C/T	C	T	0.0857389	0.322727	330	0.130735	0.980813	-0.928194
Pv2.1_07_29491225	Pv07	29491225	Pv2.1_07_29491225_C/T	C	T	0.0857898	0.181818	330	0.130732	0.980813	1.30589
Pv2.1_03_51643222	Pv03	51643222	Pv2.1_03_51643222_C/T	C	T	0.0859649	0.124242	330	0.130723	0.980813	1.36346
Pv2.1_03_44441461	Pv03	44441461	Pv2.1_03_44441461_A/G	A	G	0.0860442	0.0712121	330	0.130719	0.980813	1.75141
Pv2.1_01_46599636	Pv01	46599636	Pv2.1_01_46599636_A/G	A	G	0.0860638	0.0590909	330	0.130718	0.980813	-2.00632
Pv2.1_02_49095090	Pv02	49095090	Pv2.1_02_49095090_A/G	A	G	0.0860776	0.206061	330	0.130717	0.980813	-1.03408
Pv2.1_08_60779846	Pv08	60779846	Pv2.1_08_60779846_G/A	G	A	0.0861333	0.189394	330	0.130714	0.980813	-1.51905
Pv2.1_11_48879032	Pv011	48879032	Pv2.1_11_48879032_G/A	G	A	0.0861813	0.080303	330	0.130712	0.980813	-1.77128
Pv2.1_07_39936414	Pv07	39936414	Pv2.1_07_39936414_G/T	G	T	0.0862179	0.181818	330	0.13071	0.980813	1.50032
Pv2.1_03_2029848	Pv03	2029848	Pv2.1_03_2029848_C/A	C	A	0.0863731	0.412121	330	0.130702	0.980813	-0.971408
Pv2.1_04_47400990	Pv04	47400990	Pv2.1_04_47400990_C/G	C	G	0.0864034	0.0818182	330	0.130701	0.980813	1.27042
Pv2.1_02_43443956	Pv02	43443956	Pv2.1_02_43443956_A/G	A	G	0.0865889	0.210606	330	0.130691	0.980813	-1.63549
Pv2.1_05_36907479	Pv05	36907479	Pv2.1_05_36907479_G/A	G	A	0.0867387	0.386364	330	0.130684	0.980813	-0.9609
Pv2.1_08_60340373	Pv08	60340373	Pv2.1_08_60340373_C/A	C	A	0.0868682	0.0924242	330	0.130677	0.980813	-1.80196
Pv2.1_08_53783566	Pv08	53783566	Pv2.1_08_53783566_T/G	T	G	0.0870218	0.0348485	330	0.130669	0.980813	-1.87692
Pv2.1_02_26957310	Pv02	26957310	Pv2.1_02_26957310_C/T	C	T	0.0871068	0.243939	330	0.130665	0.980813	-0.903476
Pv2.1_02_28004018	Pv02	28004018	Pv2.1_02_28004018_A/G	A	G	0.0872192	0.172727	330	0.130659	0.980813	1.37928
Pv2.1_01_46254411	Pv01	46254411	Pv2.1_01_46254411_C/G	C	G	0.0872379	0.14697	330	0.130658	0.980813	-1.59063
Pv2.1_07_30945502	Pv07	30945502	Pv2.1_07_30945502_G/T	G	T	0.0872944	0.183333	330	0.130655	0.980813	-1.22431
Pv2.1_04_43411258	Pv04	43411258	Pv2.1_04_43411258_G/T	G	T	0.0873518	0.119697	330	0.130653	0.980813	-1.66043
Pv2.1_04_47833944	Pv04	47833944	Pv2.1_04_47833944_G/C	G	C	0.0873784	0.140909	330	0.130651	0.980813	-1.25074
Pv2.1_11_48937852	Pv011	48937852	Pv2.1_11_48937852_T/C	T	C	0.0875073	0.0636364	330	0.130645	0.980813	-1.70884
Pv2.1_07_30155436	Pv07	30155436	Pv2.1_07_30155436_T/A	T	A	0.0875166	0.0651515	330	0.130644	0.980813	2.08756
Pv2.1_11_17258426	Pv011	17258426	Pv2.1_11_17258426_T/G	T	G	0.0875188	0.175758	330	0.130644	0.980813	-1.4173
Pv2.1_11_1173941	Pv011	1173941	Pv2.1_11_1173941_T/G	T	G	0.0875328	0.0575758	330	0.130643	0.980813	-1.79605
Pv2.1_03_44056005	Pv03	44056005	Pv2.1_03_44056005_A/T	A	T	0.0878548	0.29697	330	0.130627	0.980813	-1.16065
Pv2.1_03_36338051	Pv03	36338051	Pv2.1_03_36338051_C/G	C	G	0.0878824	0.187879	330	0.130626	0.980813	-1.48301
Pv2.1_01_46599593	Pv01	46599593	Pv2.1_01_46599593_A/G	A	G	0.0879273	0.0636364	330	0.130624	0.980813	-1.94483
Pv2.1_11_45234144	Pv011	45234144	Pv2.1_11_45234144_A/G	A	G	0.0880204	0.0515152	330	0.130619	0.980813	-2.11738
Pv2.1_04_47654314	Pv04	47654314	Pv2.1_04_47654314_T/C	T	C	0.0881606	0.190909	330	0.130612	0.980813	-1.29648
Pv2.1_09_8453803	Pv09	8453803	Pv2.1_09_8453803_G/A	G	A	0.0884661	0.0575758	330	0.130597	0.980813	-1.74596
Pv2.1_10_44025101	Pv010	44025101	Pv2.1_10_44025101_A/T	A	T	0.0884896	0.0393939	330	0.130596	0.980813	1.95593
Pv2.1_02_44492809	Pv02	44492809	Pv2.1_02_44492809_C/T	C	T	0.0887686	0.213636	330	0.130582	0.980813	-1.39064
Pv2.1_02_4745225	Pv02	4745225	Pv2.1_02_4745225_A/T	A	T	0.0888056	0.118182	330	0.13058	0.980813	-1.28438
Pv2.1_10_32127701	Pv010	32127701	Pv2.1_10_32127701_C/G	C	G	0.0890462	0.0878788	330	0.130568	0.980813	-1.8088
Pv2.1_04_152555	Pv04	152555	Pv2.1_04_152555_G/C	G	C	0.0891685	0.169697	330	0.130562	0.980813	1.04279
Pv2.1_07_28532637	Pv07	28532637	Pv2.1_07_28532637_T/C	T	C	0.0891893	0.0454545	330	0.130561	0.980813	-2.06181
Pv2.1_08_59981993	Pv08	59981993	Pv2.1_08_59981993_A/G	A	G	0.0895353	0.177273	330	0.130544	0.980813	1.3692
Pv2.1_07_39116608	Pv07	39116608	Pv2.1_07_39116608_G/A	G	A	0.0895878	0.462121	330	0.130541	0.980813	-0.916135
Pv2.1_07_2937308	Pv07	2937308	Pv2.1_07_2937308_T/A	T	A	0.0896162	0.231818	330	0.13054	0.980813	1.33489
Pv2.1_01_49931348	Pv01	49931348	Pv2.1_01_49931348_G/A	G	A	0.0896596	0.156061	330	0.130538	0.980813	-1.49735
Pv2.1_02_43578732	Pv02	43578732	Pv2.1_02_43578732_G/A	G	A	0.0898489	0.30303	330	0.130529	0.980813	1.27354
Pv2.1_06_13814695	Pv06	13814695	Pv2.1_06_13814695_A/G	A	G	0.0899146	0.113636	330	0.130525	0.980813	1.69545
Pv2.1_01_49617626	Pv01	49617626	Pv2.1_01_49617626_C/G	C	G	0.0899358	0.151515	330	0.130524	0.980813	-1.05273
Pv2.1_05_36907438	Pv05	36907438	Pv2.1_05_36907438_G/A	G	A	0.0899523	0.389394	330	0.130524	0.980813	-0.940914
Pv2.1_08_62276157	Pv08	62276157	Pv2.1_08_62276157_T/G	T	G	0.0900144	0.166667	330	0.130521	0.980813	-1.2448
Pv2.1_02_43857418	Pv02	43857418	Pv2.1_02_43857418_T/G	T	G	0.0901503	0.204545	330	0.130514	0.980813	1.45744
Pv2.1_03_46931788	Pv03	46931788	Pv2.1_03_46931788_C/G	C	G	0.0902257	0.0621212	330	0.13051	0.980813	1.78092
Pv2.1_02_46566153	Pv02	46566153	Pv2.1_02_46566153_T/A	T	A	0.0902818	0.183333	330	0.130508	0.980813	1.41396
Pv2.1_07_39131183	Pv07	39131183	Pv2.1_07_39131183_A/T	A	T	0.0905492	0.19697	330	0.130495	0.980813	1.23406
Pv2.1_05_38267054	Pv05	38267054	Pv2.1_05_38267054_A/G	A	G	0.0905796	0.451515	330	0.130493	0.980813	0.881628
Pv2.1_05_573320	Pv05	573320	Pv2.1_05_573320_T/C	T	C	0.0906886	0.0893939	330	0.130488	0.980813	-1.36376
Pv2.1_01_45326251	Pv01	45326251	Pv2.1_01_45326251_G/A	G	A	0.0907756	0.163636	330	0.130484	0.980813	1.6417
Pv2.1_10_4352958	Pv010	4352958	Pv2.1_10_4352958_G/A	G	A	0.0907882	0.133333	330	0.130483	0.980813	-1.26658
Pv2.1_10_2866305	Pv010	2866305	Pv2.1_10_2866305_T/C	T	C	0.0908286	0.290909	330	0.130481	0.980813	-0.831029
Pv2.1_03_51884848	Pv03	51884848	Pv2.1_03_51884848_C/A	C	A	0.0908789	0.206061	330	0.130479	0.980813	-1.11001
Pv2.1_08_60239432	Pv08	60239432	Pv2.1_08_60239432_C/A	C	A	0.0909686	0.265152	330	0.130474	0.980813	-1.01798
Pv2.1_02_48378567	Pv02	48378567	Pv2.1_02_48378567_A/G	A	G	0.0910241	0.480303	330	0.130472	0.980813	0.988982
Pv2.1_02_45978694	Pv02	45978694	Pv2.1_02_45978694_A/T	A	T	0.0911757	0.0545455	330	0.130464	0.980813	-2.00485
Pv2.1_02_45978700	Pv02	45978700	Pv2.1_02_45978700_G/A	G	A	0.0911757	0.0545455	330	0.130464	0.980813	2.00485
Pv2.1_08_59879026	Pv08	59879026	Pv2.1_08_59879026_G/T	G	T	0.091343	0.0712121	330	0.130456	0.980813	1.94884
Pv2.1_10_42187754	Pv010	42187754	Pv2.1_10_42187754_T/G	T	G	0.0913642	0.137879	330	0.130455	0.980813	-1.27356
Pv2.1_07_37292903	Pv07	37292903	Pv2.1_07_37292903_C/T	C	T	0.0913689	0.206061	330	0.130455	0.980813	1.27427
Pv2.1_05_38677400	Pv05	38677400	Pv2.1_05_38677400_C/A	C	A	0.091693	0.469697	330	0.13044	0.980813	-0.871944
Pv2.1_11_48501666	Pv011	48501666	Pv2.1_11_48501666_T/C	T	C	0.0918743	0.204545	330	0.130431	0.980813	-1.42931
Pv2.1_02_670503	Pv02	670503	Pv2.1_02_670503_C/A	C	A	0.0918939	0.169697	330	0.13043	0.980813	-1.15301
Pv2.1_02_44135109	Pv02	44135109	Pv2.1_02_44135109_T/C	T	C	0.0919862	0.177273	330	0.130426	0.980813	1.64743
Pv2.1_11_1091125	Pv011	1091125	Pv2.1_11_1091125_G/A	G	A	0.0920228	0.139394	330	0.130424	0.980813	-1.46096
Pv2.1_02_46566204	Pv02	46566204	Pv2.1_02_46566204_A/C	A	C	0.0920513	0.310606	330	0.130422	0.980813	0.896535
Pv2.1_02_30231431	Pv02	30231431	Pv2.1_02_30231431_G/T	G	T	0.0920566	0.260606	330	0.130422	0.980813	0.900472
Pv2.1_06_9560203	Pv06	9560203	Pv2.1_06_9560203_G/T	G	T	0.09207	0.1	330	0.130422	0.980813	1.49432
Pv2.1_04_46981373	Pv04	46981373	Pv2.1_04_46981373_A/G	A	G	0.0924132	0.215152	330	0.130405	0.980813	0.979724
Pv2.1_06_20380367	Pv06	20380367	Pv2.1_06_20380367_T/G	T	G	0.0926667	0.0545455	330	0.130393	0.980813	1.70257
Pv2.1_07_39071801	Pv07	39071801	Pv2.1_07_39071801_A/G	A	G	0.0930456	0.369697	330	0.130375	0.980813	-0.908609
Pv2.1_02_39814212	Pv02	39814212	Pv2.1_02_39814212_A/G	A	G	0.09309	0.0893939	330	0.130373	0.980813	1.53501
Pv2.1_01_50973159	Pv01	50973159	Pv2.1_01_50973159_A/G	A	G	0.0932457	0.0606061	330	0.130366	0.980813	1.8777
Pv2.1_05_36604398	Pv05	36604398	Pv2.1_05_36604398_T/C	T	C	0.0934221	0.0939394	330	0.130358	0.980813	-1.37065
Pv2.1_11_48937838	Pv011	48937838	Pv2.1_11_48937838_A/C	A	C	0.0937332	0.0621212	330	0.130343	0.980813	1.71232
Pv2.1_07_2401392	Pv07	2401392	Pv2.1_07_2401392_T/A	T	A	0.0938166	0.136364	330	0.130339	0.980813	1.33082
Pv2.1_03_51422658	Pv03	51422658	Pv2.1_03_51422658_A/G	A	G	0.0938852	0.268182	330	0.130336	0.980813	-1.01349
Pv2.1_01_51193012	Pv01	51193012	Pv2.1_01_51193012_T/A	T	A	0.0940919	0.0515152	330	0.130326	0.980813	-1.65212
Pv2.1_03_46895203	Pv03	46895203	Pv2.1_03_46895203_A/G	A	G	0.0941724	0.0560606	330	0.130323	0.980813	1.59171
Pv2.1_02_12351198	Pv02	12351198	Pv2.1_02_12351198_A/T	A	T	0.0944875	0.030303	330	0.130308	0.980813	-2.2256
Pv2.1_02_20048031	Pv02	20048031	Pv2.1_02_20048031_G/A	G	A	0.0946144	0.14697	330	0.130302	0.980813	1.30041
Pv2.1_03_51355718	Pv03	51355718	Pv2.1_03_51355718_C/T	C	T	0.0947262	0.269697	330	0.130297	0.980813	-1.02027
Pv2.1_07_37780499	Pv07	37780499	Pv2.1_07_37780499_T/C	T	C	0.0947449	0.137879	330	0.130296	0.980813	-1.37978
Pv2.1_01_51166379	Pv01	51166379	Pv2.1_01_51166379_T/G	T	G	0.0948023	0.0939394	330	0.130294	0.980813	-1.54005
Pv2.1_05_11706393	Pv05	11706393	Pv2.1_05_11706393_A/T	A	T	0.0948826	0.0984848	330	0.13029	0.980813	-1.49876
Pv2.1_09_12445441	Pv09	12445441	Pv2.1_09_12445441_A/C	A	C	0.0950294	0.193939	330	0.130283	0.980813	-1.5163
Pv2.1_11_48373478	Pv011	48373478	Pv2.1_11_48373478_A/G	A	G	0.0950361	0.0727273	330	0.130283	0.980813	1.7515
Pv2.1_11_47186133	Pv011	47186133	Pv2.1_11_47186133_A/T	A	T	0.09506	0.0757576	330	0.130282	0.980813	1.83528
Pv2.1_04_43899945	Pv04	43899945	Pv2.1_04_43899945_C/T	C	T	0.0950886	0.321212	330	0.13028	0.980813	0.784205
Pv2.1_11_1087271	Pv011	1087271	Pv2.1_11_1087271_T/C	T	C	0.0951063	0.206061	330	0.13028	0.980813	-1.03431
Pv2.1_07_39372527	Pv07	39372527	Pv2.1_07_39372527_C/T	C	T	0.0955345	0.383333	330	0.13026	0.980813	0.870971
Pv2.1_07_3889647	Pv07	3889647	Pv2.1_07_3889647_A/T	A	T	0.0956693	0.372727	330	0.130254	0.980813	0.809217
Pv2.1_01_48613484	Pv01	48613484	Pv2.1_01_48613484_G/A	G	A	0.0957017	0.151515	330	0.130252	0.980813	-1.47407
Pv2.1_09_12105403	Pv09	12105403	Pv2.1_09_12105403_A/G	A	G	0.095732	0.0590909	330	0.130251	0.980813	1.88621
Pv2.1_07_3359118	Pv07	3359118	Pv2.1_07_3359118_A/G	A	G	0.0957569	0.121212	330	0.13025	0.980813	-1.51882
Pv2.1_03_6247275	Pv03	6247275	Pv2.1_03_6247275_T/C	T	C	0.095904	0.242424	330	0.130243	0.980813	-0.858665
Pv2.1_05_11873943	Pv05	11873943	Pv2.1_05_11873943_A/C	A	C	0.0959767	0.189394	330	0.13024	0.980813	-1.45995
Pv2.1_05_1034784	Pv05	1034784	Pv2.1_05_1034784_G/A	G	A	0.0960592	0.337879	330	0.130236	0.980813	-0.942578
Pv2.1_01_45579659	Pv01	45579659	Pv2.1_01_45579659_T/C	T	C	0.0961455	0.139394	330	0.130232	0.980813	1.31505
Pv2.1_05_11216974	Pv05	11216974	Pv2.1_05_11216974_A/T	A	T	0.0962477	0.069697	330	0.130227	0.980813	-1.82407
Pv2.1_07_33784573	Pv07	33784573	Pv2.1_07_33784573_A/C	A	C	0.0963475	0.0530303	330	0.130223	0.980813	1.3265
Pv2.1_11_40964524	Pv011	40964524	Pv2.1_11_40964524_C/T	C	T	0.0964642	0.422727	330	0.130218	0.980813	-0.829922
Pv2.1_11_3831717	Pv011	3831717	Pv2.1_11_3831717_A/G	A	G	0.0964701	0.142424	330	0.130217	0.980813	0.946375
Pv2.1_02_44599153	Pv02	44599153	Pv2.1_02_44599153_T/A	T	A	0.0964827	0.186364	330	0.130217	0.980813	1.43639
Pv2.1_06_27776021	Pv06	27776021	Pv2.1_06_27776021_G/A	G	A	0.0965838	0.169697	330	0.130212	0.980813	1.2911
Pv2.1_03_44118874	Pv03	44118874	Pv2.1_03_44118874_A/G	A	G	0.0967	0.210606	330	0.130207	0.980813	-1.23691
Pv2.1_01_4306849	Pv01	4306849	Pv2.1_01_4306849_T/A	T	A	0.0970182	0.0409091	330	0.130193	0.980813	2.21529
Pv2.1_05_38444090	Pv05	38444090	Pv2.1_05_38444090_A/G	A	G	0.0970492	0.0863636	330	0.130191	0.980813	-1.38608
Pv2.1_07_4598047	Pv07	4598047	Pv2.1_07_4598047_A/T	A	T	0.0971234	0.130303	330	0.130188	0.980813	1.53262
Pv2.1_02_43806158	Pv02	43806158	Pv2.1_02_43806158_A/G	A	G	0.0971371	0.224242	330	0.130187	0.980813	-1.26713
Pv2.1_10_42544512	Pv010	42544512	Pv2.1_10_42544512_A/T	A	T	0.0972113	0.115152	330	0.130184	0.980813	-1.28231
Pv2.1_02_3562332	Pv02	3562332	Pv2.1_02_3562332_C/T	C	T	0.0973285	0.227273	330	0.130179	0.980813	1.07186
Pv2.1_03_52011267	Pv03	52011267	Pv2.1_03_52011267_G/C	G	C	0.0974131	0.159091	330	0.130175	0.980813	-1.28384
Pv2.1_03_52011272	Pv03	52011272	Pv2.1_03_52011272_G/C	G	C	0.0974131	0.159091	330	0.130175	0.980813	-1.28384
Pv2.1_02_45719006	Pv02	45719006	Pv2.1_02_45719006_G/C	G	C	0.0974754	0.233333	330	0.130172	0.980813	-1.15971
Pv2.1_10_42930964	Pv010	42930964	Pv2.1_10_42930964_C/A	C	A	0.0976396	0.0530303	330	0.130165	0.980813	1.50902
Pv2.1_03_44053254	Pv03	44053254	Pv2.1_03_44053254_C/T	C	T	0.0978574	0.212121	330	0.130155	0.980813	-1.11868
Pv2.1_03_2553788	Pv03	2553788	Pv2.1_03_2553788_T/C	T	C	0.0979323	0.030303	330	0.130152	0.980813	-1.98081
Pv2.1_07_4116712	Pv07	4116712	Pv2.1_07_4116712_G/A	G	A	0.0980863	0.14697	330	0.130145	0.980813	-1.47812
Pv2.1_11_6933851	Pv011	6933851	Pv2.1_11_6933851_A/T	A	T	0.0981225	0.101515	330	0.130143	0.980813	1.53867
Pv2.1_05_6768520	Pv05	6768520	Pv2.1_05_6768520_G/A	G	A	0.098124	0.0424242	330	0.130143	0.980813	2.25622
Pv2.1_02_1152176	Pv02	1152176	Pv2.1_02_1152176_G/T	G	T	0.0981611	0.112121	330	0.130142	0.980813	1.33892
Pv2.1_11_40566820	Pv011	40566820	Pv2.1_11_40566820_G/A	G	A	0.0981611	0.189394	330	0.130142	0.980813	-1.02667
Pv2.1_07_27774103	Pv07	27774103	Pv2.1_07_27774103_C/T	C	T	0.0981935	0.221212	330	0.13014	0.980813	1.15019
Pv2.1_05_5572080	Pv05	5572080	Pv2.1_05_5572080_G/A	G	A	0.0983337	0.0893939	330	0.130134	0.980813	1.62822
Pv2.1_04_46477969	Pv04	46477969	Pv2.1_04_46477969_G/A	G	A	0.0983506	0.227273	330	0.130133	0.980813	1.16788
Pv2.1_05_531323	Pv05	531323	Pv2.1_05_531323_T/A	T	A	0.0984713	0.15303	330	0.130128	0.980813	-1.34003
Pv2.1_05_38777549	Pv05	38777549	Pv2.1_05_38777549_T/C	T	C	0.0986421	0.0454545	330	0.13012	0.980813	1.75506
Pv2.1_08_59994978	Pv08	59994978	Pv2.1_08_59994978_G/A	G	A	0.099105	0.269697	330	0.1301	0.980813	-0.809335
Pv2.1_09_7561791	Pv09	7561791	Pv2.1_09_7561791_G/A	G	A	0.0992914	0.195455	330	0.130092	0.980813	-1.24894
Pv2.1_09_36684701	Pv09	36684701	Pv2.1_09_36684701_G/A	G	A	0.0993173	0.0893939	330	0.130091	0.980813	1.33532
Pv2.1_01_45739281	Pv01	45739281	Pv2.1_01_45739281_G/A	G	A	0.0995613	0.0484848	330	0.13008	0.980813	2.08288
Pv2.1_07_236587	Pv07	236587	Pv2.1_07_236587_T/G	T	G	0.0995703	0.209091	330	0.13008	0.980813	0.956386
Pv2.1_08_60442700	Pv08	60442700	Pv2.1_08_60442700_G/T	G	T	0.0995839	0.0560606	330	0.130079	0.980813	1.91945
Pv2.1_08_60442695	Pv08	60442695	Pv2.1_08_60442695_G/C	G	C	0.0995839	0.0560606	330	0.130079	0.980813	-1.91945
Pv2.1_08_60442696	Pv08	60442696	Pv2.1_08_60442696_G/A	G	A	0.0995839	0.0560606	330	0.130079	0.980813	-1.91945
Pv2.1_10_38134465	Pv010	38134465	Pv2.1_10_38134465_T/C	T	C	0.0996067	0.0863636	330	0.130078	0.980813	-1.72467
Pv2.1_01_50364990	Pv01	50364990	Pv2.1_01_50364990_G/T	G	T	0.099779	0.139394	330	0.130071	0.980813	1.60047
Pv2.1_01_50364992	Pv01	50364992	Pv2.1_01_50364992_G/T	G	T	0.099779	0.139394	330	0.130071	0.980813	1.60047
Pv2.1_10_33297236	Pv010	33297236	Pv2.1_10_33297236_C/T	C	T	0.0998325	0.0515152	330	0.130068	0.980813	1.8697
Pv2.1_08_60277839	Pv08	60277839	Pv2.1_08_60277839_C/T	C	T	0.099953	0.186364	330	0.130063	0.980813	-1.28693
Pv2.1_03_41421963	Pv03	41421963	Pv2.1_03_41421963_G/C	G	C	0.100382	0.204545	330	0.130044	0.980813	1.03384
Pv2.1_03_45906	Pv03	45906	Pv2.1_03_45906_C/T	C	T	0.100386	0.109091	330	0.130044	0.980813	1.30989
Pv2.1_09_32923269	Pv09	32923269	Pv2.1_09_32923269_G/C	G	C	0.10086	0.207576	330	0.130024	0.980813	1.25968
Pv2.1_04_45482233	Pv04	45482233	Pv2.1_04_45482233_C/G	C	G	0.10089	0.295455	330	0.130022	0.980813	-1.1513
Pv2.1_03_52715172	Pv03	52715172	Pv2.1_03_52715172_T/C	T	C	0.100901	0.125758	330	0.130022	0.980813	-1.31719
Pv2.1_04_47575748	Pv04	47575748	Pv2.1_04_47575748_A/G	A	G	0.101202	0.137879	330	0.130009	0.980813	0.99496
Pv2.1_04_47086900	Pv04	47086900	Pv2.1_04_47086900_C/G	C	G	0.101227	0.207576	330	0.130008	0.980813	-1.22309
Pv2.1_02_216829	Pv02	216829	Pv2.1_02_216829_T/C	T	C	0.101338	0.251515	330	0.130003	0.980813	1.06003
Pv2.1_10_41264804	Pv010	41264804	Pv2.1_10_41264804_A/T	A	T	0.101393	0.210606	330	0.130001	0.980813	-1.01099
Pv2.1_03_50910154	Pv03	50910154	Pv2.1_03_50910154_G/T	G	T	0.101405	0.160606	330	0.13	0.980813	1.065
Pv2.1_02_47302532	Pv02	47302532	Pv2.1_02_47302532_T/C	T	C	0.101667	0.0590909	330	0.129989	0.980813	-1.72835
Pv2.1_07_39844718	Pv07	39844718	Pv2.1_07_39844718_A/G	A	G	0.101751	0.30303	330	0.129986	0.980813	-0.892553
Pv2.1_07_3961769	Pv07	3961769	Pv2.1_07_3961769_A/G	A	G	0.101762	0.457576	330	0.129985	0.980813	-0.936843
Pv2.1_02_238928	Pv02	238928	Pv2.1_02_238928_G/A	G	A	0.101806	0.0787879	330	0.129983	0.980813	1.16558
Pv2.1_07_37288828	Pv07	37288828	Pv2.1_07_37288828_G/T	G	T	0.101965	0.0727273	330	0.129976	0.980813	1.63818
Pv2.1_08_7377355	Pv08	7377355	Pv2.1_08_7377355_C/A	C	A	0.102018	0.145455	330	0.129974	0.980813	-1.03392
Pv2.1_06_22262551	Pv06	22262551	Pv2.1_06_22262551_C/T	C	T	0.102093	0.180303	330	0.129971	0.980813	-1.49775
Pv2.1_03_39684240	Pv03	39684240	Pv2.1_03_39684240_T/C	T	C	0.102104	0.110606	330	0.12997	0.980813	1.7647
Pv2.1_07_3919503	Pv07	3919503	Pv2.1_07_3919503_C/T	C	T	0.102152	0.378788	330	0.129968	0.980813	0.776044
Pv2.1_03_52855522	Pv03	52855522	Pv2.1_03_52855522_T/G	T	G	0.102252	0.130303	330	0.129964	0.980813	-1.47608
Pv2.1_07_23591893	Pv07	23591893	Pv2.1_07_23591893_T/A	T	A	0.102284	0.219697	330	0.129963	0.980813	-0.973467
Pv2.1_05_39463851	Pv05	39463851	Pv2.1_05_39463851_T/C	T	C	0.102364	0.0378788	330	0.129959	0.980813	1.52186
Pv2.1_05_39463859	Pv05	39463859	Pv2.1_05_39463859_A/G	A	G	0.102364	0.0378788	330	0.129959	0.980813	-1.52186
Pv2.1_10_38134451	Pv010	38134451	Pv2.1_10_38134451_G/A	G	A	0.10247	0.0818182	330	0.129955	0.980813	-1.8003
Pv2.1_10_4352923	Pv010	4352923	Pv2.1_10_4352923_G/T	G	T	0.102529	0.133333	330	0.129952	0.980813	1.17347
Pv2.1_02_9118504	Pv02	9118504	Pv2.1_02_9118504_G/C	G	C	0.102543	0.0772727	330	0.129952	0.980813	1.68534
Pv2.1_05_11435725	Pv05	11435725	Pv2.1_05_11435725_C/T	C	T	0.102577	0.0969697	330	0.12995	0.980813	1.44016
Pv2.1_02_49587893	Pv02	49587893	Pv2.1_02_49587893_A/G	A	G	0.102651	0.377273	330	0.129947	0.980813	0.941947
Pv2.1_06_12444378	Pv06	12444378	Pv2.1_06_12444378_G/A	G	A	0.102762	0.2	330	0.129943	0.980813	-1.38582
Pv2.1_07_727246	Pv07	727246	Pv2.1_07_727246_C/T	C	T	0.10295	0.315152	330	0.129935	0.980813	1.02365
Pv2.1_04_33747331	Pv04	33747331	Pv2.1_04_33747331_T/A	T	A	0.103119	0.222727	330	0.129928	0.980813	1.45551
Pv2.1_03_41422080	Pv03	41422080	Pv2.1_03_41422080_T/C	T	C	0.103159	0.331818	330	0.129926	0.980813	0.905244
Pv2.1_04_42947439	Pv04	42947439	Pv2.1_04_42947439_A/T	A	T	0.103169	0.143939	330	0.129925	0.980813	1.50532
Pv2.1_10_43172249	Pv010	43172249	Pv2.1_10_43172249_C/A	C	A	0.103307	0.0727273	330	0.12992	0.980813	1.24619
Pv2.1_10_42388079	Pv010	42388079	Pv2.1_10_42388079_C/A	C	A	0.103442	0.0939394	330	0.129914	0.980813	-1.44387
Pv2.1_07_36708090	Pv07	36708090	Pv2.1_07_36708090_T/C	T	C	0.103726	0.189394	330	0.129902	0.980813	-0.999225
Pv2.1_04_25600642	Pv04	25600642	Pv2.1_04_25600642_C/T	C	T	0.103749	0.293939	330	0.129901	0.980813	1.45111
Pv2.1_11_46991424	Pv011	46991424	Pv2.1_11_46991424_C/T	C	T	0.104352	0.45	330	0.129876	0.980813	1.18762
Pv2.1_07_5609975	Pv07	5609975	Pv2.1_07_5609975_G/C	G	C	0.104365	0.0909091	330	0.129876	0.980813	-1.97938
Pv2.1_11_2383219	Pv011	2383219	Pv2.1_11_2383219_G/T	G	T	0.10464	0.40303	330	0.129864	0.980813	-0.844107
Pv2.1_02_4264761	Pv02	4264761	Pv2.1_02_4264761_G/C	G	C	0.104849	0.148485	330	0.129855	0.980813	-1.22531
Pv2.1_01_51076758	Pv01	51076758	Pv2.1_01_51076758_C/T	C	T	0.104991	0.159091	330	0.12985	0.980813	1.20383
Pv2.1_11_1342966	Pv011	1342966	Pv2.1_11_1342966_C/T	C	T	0.105065	0.0651515	330	0.129847	0.980813	-1.43624
Pv2.1_02_49122908	Pv02	49122908	Pv2.1_02_49122908_A/T	A	T	0.105076	0.310606	330	0.129846	0.980813	-0.943926
Pv2.1_11_1155946	Pv011	1155946	Pv2.1_11_1155946_C/T	C	T	0.10517	0.245455	330	0.129842	0.980813	0.996685
Pv2.1_06_2930764	Pv06	2930764	Pv2.1_06_2930764_G/T	G	T	0.105263	0.174242	330	0.129838	0.980813	1.21122
Pv2.1_02_49026180	Pv02	49026180	Pv2.1_02_49026180_T/C	T	C	0.105326	0.316667	330	0.129836	0.980813	1.05966
Pv2.1_10_43017460	Pv010	43017460	Pv2.1_10_43017460_A/G	A	G	0.105366	0.104545	330	0.129834	0.980813	-1.45685
Pv2.1_04_5395410	Pv04	5395410	Pv2.1_04_5395410_C/T	C	T	0.10541	0.193939	330	0.129832	0.980813	1.27049
Pv2.1_08_2030020	Pv08	2030020	Pv2.1_08_2030020_C/G	C	G	0.105707	0.0848485	330	0.12982	0.980813	-1.22989
Pv2.1_04_43220037	Pv04	43220037	Pv2.1_04_43220037_G/A	G	A	0.106127	0.163636	330	0.129803	0.980813	1.48357
Pv2.1_04_43220009	Pv04	43220009	Pv2.1_04_43220009_C/T	C	T	0.106127	0.163636	330	0.129803	0.980813	-1.48357
Pv2.1_06_13861419	Pv06	13861419	Pv2.1_06_13861419_C/T	C	T	0.106145	0.133333	330	0.129802	0.980813	-0.984227
Pv2.1_07_3582356	Pv07	3582356	Pv2.1_07_3582356_G/A	G	A	0.106404	0.289394	330	0.129792	0.980813	-0.903645
Pv2.1_11_1581093	Pv011	1581093	Pv2.1_11_1581093_G/A	G	A	0.106569	0.39697	330	0.129785	0.980813	0.796835
Pv2.1_04_47457791	Pv04	47457791	Pv2.1_04_47457791_C/T	C	T	0.106634	0.107576	330	0.129783	0.980813	1.14576
Pv2.1_07_12777820	Pv07	12777820	Pv2.1_07_12777820_T/C	T	C	0.106655	0.340909	330	0.129782	0.980813	-0.936838
Pv2.1_08_773289	Pv08	773289	Pv2.1_08_773289_T/G	T	G	0.106671	0.327273	330	0.129781	0.980813	-0.910492
Pv2.1_02_30021241	Pv02	30021241	Pv2.1_02_30021241_T/G	T	G	0.106751	0.195455	330	0.129778	0.980813	-1.23155
Pv2.1_09_13103709	Pv09	13103709	Pv2.1_09_13103709_G/A	G	A	0.106758	0.145455	330	0.129778	0.980813	-1.42859
Pv2.1_03_14515948	Pv03	14515948	Pv2.1_03_14515948_A/C	A	C	0.106834	0.278788	330	0.129774	0.980813	0.897398
Pv2.1_03_37210404	Pv03	37210404	Pv2.1_03_37210404_C/T	C	T	0.106856	0.0636364	330	0.129774	0.980813	-1.62563
Pv2.1_08_11689315	Pv08	11689315	Pv2.1_08_11689315_T/G	T	G	0.106948	0.0924242	330	0.12977	0.980813	-1.27794
Pv2.1_04_45526919	Pv04	45526919	Pv2.1_04_45526919_A/T	A	T	0.106997	0.0454545	330	0.129768	0.980813	1.63224
Pv2.1_04_45526928	Pv04	45526928	Pv2.1_04_45526928_C/T	C	T	0.106997	0.0454545	330	0.129768	0.980813	1.63224
Pv2.1_04_45501871	Pv04	45501871	Pv2.1_04_45501871_A/C	A	C	0.107114	0.124242	330	0.129763	0.980813	1.28347
Pv2.1_02_1437712	Pv02	1437712	Pv2.1_02_1437712_C/A	C	A	0.10712	0.118182	330	0.129763	0.980813	-1.36241
Pv2.1_11_47185843	Pv011	47185843	Pv2.1_11_47185843_T/C	T	C	0.107263	0.45	330	0.129757	0.980813	-1.10637
Pv2.1_02_48467130	Pv02	48467130	Pv2.1_02_48467130_T/C	T	C	0.107507	0.187879	330	0.129747	0.980813	-1.21881
Pv2.1_05_1992170	Pv05	1992170	Pv2.1_05_1992170_T/C	T	C	0.107642	0.0969697	330	0.129742	0.980813	-1.51694
Pv2.1_02_46818830	Pv02	46818830	Pv2.1_02_46818830_G/A	G	A	0.10767	0.0454545	330	0.129741	0.980813	1.90001
Pv2.1_09_14549017	Pv09	14549017	Pv2.1_09_14549017_T/G	T	G	0.107676	0.148485	330	0.129741	0.980813	1.49921
Pv2.1_02_48376372	Pv02	48376372	Pv2.1_02_48376372_T/C	T	C	0.107717	0.45303	330	0.129739	0.980813	-0.978147
Pv2.1_02_49121624	Pv02	49121624	Pv2.1_02_49121624_A/T	A	T	0.107723	0.315152	330	0.129739	0.980813	-0.991444
Pv2.1_08_61206855	Pv08	61206855	Pv2.1_08_61206855_A/G	A	G	0.107948	0.119697	330	0.12973	0.980813	1.46782
Pv2.1_04_41740003	Pv04	41740003	Pv2.1_04_41740003_C/G	C	G	0.108043	0.216667	330	0.129726	0.980813	-1.27774
Pv2.1_08_61266523	Pv08	61266523	Pv2.1_08_61266523_C/T	C	T	0.108174	0.201515	330	0.129721	0.980813	1.21859
Pv2.1_02_48546729	Pv02	48546729	Pv2.1_02_48546729_A/G	A	G	0.108324	0.0363636	330	0.129715	0.980813	2.12757
Pv2.1_01_46826932	Pv01	46826932	Pv2.1_01_46826932_C/A	C	A	0.108361	0.0742424	330	0.129713	0.980813	1.56783
Pv2.1_10_42544494	Pv010	42544494	Pv2.1_10_42544494_G/A	G	A	0.108373	0.116667	330	0.129713	0.980813	1.22729
Pv2.1_02_43440257	Pv02	43440257	Pv2.1_02_43440257_G/A	G	A	0.108407	0.184848	330	0.129711	0.980813	1.55826
Pv2.1_07_1842933	Pv07	1842933	Pv2.1_07_1842933_A/C	A	C	0.10841	0.163636	330	0.129711	0.980813	-1.31661
Pv2.1_03_45563339	Pv03	45563339	Pv2.1_03_45563339_T/A	T	A	0.108457	0.0666667	330	0.129709	0.980813	-1.2991
Pv2.1_02_49098312	Pv02	49098312	Pv2.1_02_49098312_A/T	A	T	0.108458	0.316667	330	0.129709	0.980813	-1.01719
Pv2.1_01_51131315	Pv01	51131315	Pv2.1_01_51131315_C/G	C	G	0.108539	0.118182	330	0.129706	0.980813	1.14827
Pv2.1_03_52202396	Pv03	52202396	Pv2.1_03_52202396_C/G	C	G	0.108635	0.107576	330	0.129702	0.980813	1.30495
Pv2.1_01_3200655	Pv01	3200655	Pv2.1_01_3200655_G/A	G	A	0.108833	0.487879	330	0.129694	0.980813	0.53974
Pv2.1_07_3320567	Pv07	3320567	Pv2.1_07_3320567_G/A	G	A	0.10893	0.219697	330	0.129691	0.980813	-1.15304
Pv2.1_11_1342925	Pv011	1342925	Pv2.1_11_1342925_C/A	C	A	0.108955	0.069697	330	0.12969	0.980813	1.27366
Pv2.1_11_48517272	Pv011	48517272	Pv2.1_11_48517272_C/A	C	A	0.10908	0.0712121	330	0.129685	0.980813	-1.71064
Pv2.1_02_21020280	Pv02	21020280	Pv2.1_02_21020280_C/T	C	T	0.109093	0.080303	330	0.129684	0.980813	-1.82175
Pv2.1_02_43442363	Pv02	43442363	Pv2.1_02_43442363_G/A	G	A	0.109266	0.25303	330	0.129677	0.980813	1.25926
Pv2.1_05_9252173	Pv05	9252173	Pv2.1_05_9252173_G/A	G	A	0.109597	0.110606	330	0.129664	0.980813	-1.27009
Pv2.1_08_706890	Pv08	706890	Pv2.1_08_706890_G/T	G	T	0.109729	0.301515	330	0.129659	0.980813	0.926158
Pv2.1_04_43899875	Pv04	43899875	Pv2.1_04_43899875_T/A	T	A	0.109766	0.331818	330	0.129658	0.980813	-0.732577
Pv2.1_02_3166912	Pv02	3166912	Pv2.1_02_3166912_G/C	G	C	0.109977	0.1	330	0.129649	0.980813	-1.32016
Pv2.1_09_2133051	Pv09	2133051	Pv2.1_09_2133051_C/A	C	A	0.110367	0.165152	330	0.129634	0.980813	-1.03731
Pv2.1_03_42007067	Pv03	42007067	Pv2.1_03_42007067_C/T	C	T	0.110459	0.0742424	330	0.129631	0.980813	-1.50762
Pv2.1_05_37923698	Pv05	37923698	Pv2.1_05_37923698_A/G	A	G	0.110472	0.0454545	330	0.12963	0.980813	-1.70496
Pv2.1_05_7190835	Pv05	7190835	Pv2.1_05_7190835_T/C	T	C	0.110711	0.0818182	330	0.129621	0.980813	-1.44702
Pv2.1_04_45436183	Pv04	45436183	Pv2.1_04_45436183_T/G	T	G	0.110827	0.280303	330	0.129616	0.980813	1.17353
Pv2.1_04_45436184	Pv04	45436184	Pv2.1_04_45436184_T/A	T	A	0.110827	0.280303	330	0.129616	0.980813	1.17353
Pv2.1_02_45072672	Pv02	45072672	Pv2.1_02_45072672_C/T	C	T	0.110837	0.266667	330	0.129616	0.980813	1.09168
Pv2.1_11_48934227	Pv011	48934227	Pv2.1_11_48934227_A/T	A	T	0.111125	0.0636364	330	0.129605	0.980813	1.64403
Pv2.1_02_48035755	Pv02	48035755	Pv2.1_02_48035755_T/C	T	C	0.111358	0.183333	330	0.129596	0.980813	-1.23697
Pv2.1_03_51763562	Pv03	51763562	Pv2.1_03_51763562_C/G	C	G	0.111594	0.186364	330	0.129587	0.980813	1.17869
Pv2.1_10_42038798	Pv010	42038798	Pv2.1_10_42038798_C/T	C	T	0.111614	0.251515	330	0.129586	0.980813	1.02
Pv2.1_04_43247115	Pv04	43247115	Pv2.1_04_43247115_C/T	C	T	0.111626	0.101515	330	0.129585	0.980813	1.66949
Pv2.1_11_47092384	Pv011	47092384	Pv2.1_11_47092384_G/A	G	A	0.11164	0.466667	330	0.129585	0.980813	-1.07479
Pv2.1_03_51763641	Pv03	51763641	Pv2.1_03_51763641_T/A	T	A	0.111709	0.198485	330	0.129582	0.980813	-1.13751
Pv2.1_02_9352567	Pv02	9352567	Pv2.1_02_9352567_G/T	G	T	0.111793	0.213636	330	0.129579	0.980813	1.16243
Pv2.1_08_62372911	Pv08	62372911	Pv2.1_08_62372911_A/G	A	G	0.111834	0.348485	330	0.129577	0.980813	0.985516
Pv2.1_10_42650632	Pv010	42650632	Pv2.1_10_42650632_A/C	A	C	0.11185	0.112121	330	0.129577	0.980813	-1.3233
Pv2.1_11_323800	Pv011	323800	Pv2.1_11_323800_C/G	C	G	0.112027	0.0666667	330	0.12957	0.980813	1.39975
Pv2.1_03_47044019	Pv03	47044019	Pv2.1_03_47044019_G/T	G	T	0.112104	0.0560606	330	0.129567	0.980813	1.78875
Pv2.1_02_4371780	Pv02	4371780	Pv2.1_02_4371780_G/C	G	C	0.112507	0.0651515	330	0.129552	0.980813	-1.6777
Pv2.1_04_8787228	Pv04	8787228	Pv2.1_04_8787228_A/G	A	G	0.11261	0.231818	330	0.129548	0.980813	-1.06004
Pv2.1_09_327732	Pv09	327732	Pv2.1_09_327732_T/C	T	C	0.112624	0.139394	330	0.129547	0.980813	1.2637
Pv2.1_06_28248937	Pv06	28248937	Pv2.1_06_28248937_G/A	G	A	0.11273	0.124242	330	0.129543	0.980813	-1.42257
Pv2.1_01_48454962	Pv01	48454962	Pv2.1_01_48454962_T/A	T	A	0.112736	0.145455	330	0.129543	0.980813	-1.1383
Pv2.1_02_49205018	Pv02	49205018	Pv2.1_02_49205018_G/A	G	A	0.112817	0.272727	330	0.12954	0.980813	1.02988
Pv2.1_05_7094882	Pv05	7094882	Pv2.1_05_7094882_C/T	C	T	0.112841	0.0424242	330	0.129539	0.980813	-2.01557
Pv2.1_08_62240543	Pv08	62240543	Pv2.1_08_62240543_C/T	C	T	0.112877	0.142424	330	0.129537	0.980813	1.47956
Pv2.1_04_2418719	Pv04	2418719	Pv2.1_04_2418719_A/G	A	G	0.112903	0.298485	330	0.129536	0.980813	0.868712
Pv2.1_10_43498595	Pv010	43498595	Pv2.1_10_43498595_T/A	T	A	0.112938	0.177273	330	0.129535	0.980813	0.695183
Pv2.1_07_35220152	Pv07	35220152	Pv2.1_07_35220152_A/C	A	C	0.112965	0.15	330	0.129534	0.980813	1.50413
Pv2.1_04_45663240	Pv04	45663240	Pv2.1_04_45663240_G/A	G	A	0.112996	0.171212	330	0.129533	0.980813	-1.2034
Pv2.1_05_11216965	Pv05	11216965	Pv2.1_05_11216965_T/C	T	C	0.113188	0.0727273	330	0.129526	0.980813	1.59977
Pv2.1_05_25543036	Pv05	25543036	Pv2.1_05_25543036_A/G	A	G	0.11321	0.0818182	330	0.129525	0.980813	-1.64563
Pv2.1_05_38947228	Pv05	38947228	Pv2.1_05_38947228_A/G	A	G	0.11326	0.331818	330	0.129523	0.980813	0.958419
Pv2.1_02_49098359	Pv02	49098359	Pv2.1_02_49098359_T/A	T	A	0.113359	0.339394	330	0.129519	0.980813	1.02753
Pv2.1_03_42856778	Pv03	42856778	Pv2.1_03_42856778_G/A	G	A	0.113643	0.0969697	330	0.129508	0.980813	-1.24697
Pv2.1_04_43299415	Pv04	43299415	Pv2.1_04_43299415_T/A	T	A	0.113701	0.183333	330	0.129506	0.980813	-1.69408
Pv2.1_10_4811743	Pv010	4811743	Pv2.1_10_4811743_A/G	A	G	0.113746	0.248485	330	0.129505	0.980813	-1.02133
Pv2.1_07_37600915	Pv07	37600915	Pv2.1_07_37600915_T/A	T	A	0.113908	0.210606	330	0.129498	0.980813	1.22195
Pv2.1_09_32634348	Pv09	32634348	Pv2.1_09_32634348_T/C	T	C	0.113959	0.0590909	330	0.129496	0.980813	1.61512
Pv2.1_03_47194385	Pv03	47194385	Pv2.1_03_47194385_T/A	T	A	0.114045	0.145455	330	0.129493	0.980813	-1.28325
Pv2.1_02_47965261	Pv02	47965261	Pv2.1_02_47965261_T/C	T	C	0.114057	0.127273	330	0.129493	0.980813	-1.3075
Pv2.1_07_4325062	Pv07	4325062	Pv2.1_07_4325062_A/G	A	G	0.114137	0.193939	330	0.12949	0.980813	1.30199
Pv2.1_11_53419932	Pv011	53419932	Pv2.1_11_53419932_A/T	A	T	0.114255	0.272727	330	0.129485	0.980813	-0.910778
Pv2.1_09_7738339	Pv09	7738339	Pv2.1_09_7738339_T/A	T	A	0.11426	0.0530303	330	0.129485	0.980813	-1.79653
Pv2.1_07_3582357	Pv07	3582357	Pv2.1_07_3582357_A/C	A	C	0.114324	0.290909	330	0.129483	0.980813	0.871909
Pv2.1_07_37986095	Pv07	37986095	Pv2.1_07_37986095_T/A	T	A	0.114539	0.289394	330	0.129475	0.981766	1.06614
Pv2.1_02_10520084	Pv02	10520084	Pv2.1_02_10520084_C/G	C	G	0.114712	0.0939394	330	0.129468	0.982349	-1.44101
Pv2.1_07_444014	Pv07	444014	Pv2.1_07_444014_C/T	C	T	0.114957	0.121212	330	0.129459	0.982917	1.44687
Pv2.1_07_3961697	Pv07	3961697	Pv2.1_07_3961697_A/T	A	T	0.115006	0.45	330	0.129457	0.982917	0.8962
Pv2.1_05_38222152	Pv05	38222152	Pv2.1_05_38222152_G/A	G	A	0.115284	0.0439394	330	0.129447	0.982917	1.96665
Pv2.1_05_8316569	Pv05	8316569	Pv2.1_05_8316569_G/A	G	A	0.115339	0.0590909	330	0.129445	0.982917	1.93098
Pv2.1_04_47687116	Pv04	47687116	Pv2.1_04_47687116_G/T	G	T	0.115382	0.0878788	330	0.129443	0.982917	1.0577
Pv2.1_07_431860	Pv07	431860	Pv2.1_07_431860_T/A	T	A	0.115404	0.0545455	330	0.129442	0.982917	2.09363
Pv2.1_02_2568990	Pv02	2568990	Pv2.1_02_2568990_T/C	T	C	0.11567	0.115152	330	0.129433	0.983626	-1.40617
Pv2.1_04_46477981	Pv04	46477981	Pv2.1_04_46477981_T/C	T	C	0.115727	0.151515	330	0.12943	0.983626	1.44545
Pv2.1_09_8636368	Pv09	8636368	Pv2.1_09_8636368_A/G	A	G	0.116045	0.424242	330	0.129419	0.983626	0.896438
Pv2.1_01_47393094	Pv01	47393094	Pv2.1_01_47393094_A/G	A	G	0.116114	0.154545	330	0.129416	0.983626	-1.4082
Pv2.1_01_47393099	Pv01	47393099	Pv2.1_01_47393099_C/G	C	G	0.116114	0.154545	330	0.129416	0.983626	-1.4082
Pv2.1_01_47393116	Pv01	47393116	Pv2.1_01_47393116_C/G	C	G	0.116114	0.154545	330	0.129416	0.983626	-1.4082
Pv2.1_02_29726006	Pv02	29726006	Pv2.1_02_29726006_G/A	G	A	0.116237	0.107576	330	0.129412	0.983783	1.31645
Pv2.1_02_46566123	Pv02	46566123	Pv2.1_02_46566123_T/C	T	C	0.11649	0.295455	330	0.129402	0.983842	-0.834801
Pv2.1_07_39413116	Pv07	39413116	Pv2.1_07_39413116_T/C	T	C	0.116564	0.474242	330	0.1294	0.983842	-0.837506
Pv2.1_09_18222054	Pv09	18222054	Pv2.1_09_18222054_A/G	A	G	0.116623	0.0969697	330	0.129397	0.983842	-0.980205
Pv2.1_04_4342472	Pv04	4342472	Pv2.1_04_4342472_C/T	C	T	0.116662	0.0848485	330	0.129396	0.983842	1.01597
Pv2.1_10_36734169	Pv010	36734169	Pv2.1_10_36734169_G/C	G	C	0.117029	0.0590909	330	0.129383	0.984438	-1.74194
Pv2.1_06_21423502	Pv06	21423502	Pv2.1_06_21423502_G/A	G	A	0.117057	0.274242	330	0.129382	0.984438	-0.827642
Pv2.1_03_37735340	Pv03	37735340	Pv2.1_03_37735340_G/A	G	A	0.117194	0.145455	330	0.129377	0.984438	1.37909
Pv2.1_02_48315210	Pv02	48315210	Pv2.1_02_48315210_C/T	C	T	0.117268	0.477273	330	0.129374	0.984438	-0.854702
Pv2.1_11_12052171	Pv011	12052171	Pv2.1_11_12052171_T/C	T	C	0.117596	0.398485	330	0.129362	0.984438	-0.85544
Pv2.1_08_61525701	Pv08	61525701	Pv2.1_08_61525701_A/T	A	T	0.117661	0.0924242	330	0.12936	0.984438	1.5444
Pv2.1_07_35443199	Pv07	35443199	Pv2.1_07_35443199_A/T	A	T	0.117682	0.131818	330	0.129359	0.984438	-1.51832
Pv2.1_03_43931440	Pv03	43931440	Pv2.1_03_43931440_T/C	T	C	0.117869	0.322727	330	0.129352	0.984438	-0.831768
Pv2.1_08_59865316	Pv08	59865316	Pv2.1_08_59865316_A/G	A	G	0.118057	0.169697	330	0.129345	0.984438	1.41456
Pv2.1_07_39116609	Pv07	39116609	Pv2.1_07_39116609_T/A	T	A	0.118328	0.463636	330	0.129335	0.984438	-0.818942
Pv2.1_02_38758464	Pv02	38758464	Pv2.1_02_38758464_A/T	A	T	0.118397	0.0712121	330	0.129333	0.984438	-1.4027
Pv2.1_07_41532	Pv07	41532	Pv2.1_07_41532_G/T	G	T	0.118439	0.212121	330	0.129331	0.984438	-1.26027
Pv2.1_04_2418454	Pv04	2418454	Pv2.1_04_2418454_A/G	A	G	0.11854	0.0393939	330	0.129328	0.984438	1.87394
Pv2.1_03_51297886	Pv03	51297886	Pv2.1_03_51297886_C/A	C	A	0.118603	0.233333	330	0.129325	0.984438	-1.21885
Pv2.1_05_38443847	Pv05	38443847	Pv2.1_05_38443847_G/C	G	C	0.118888	0.193939	330	0.129315	0.984438	-1.16602
Pv2.1_07_3001195	Pv07	3001195	Pv2.1_07_3001195_C/G	C	G	0.118964	0.159091	330	0.129313	0.984438	-1.31972
Pv2.1_06_3348438	Pv06	3348438	Pv2.1_06_3348438_A/C	A	C	0.119098	0.148485	330	0.129308	0.984438	-1.26888
Pv2.1_03_3533378	Pv03	3533378	Pv2.1_03_3533378_C/T	C	T	0.119228	0.131818	330	0.129303	0.984438	-1.3698
Pv2.1_02_3818366	Pv02	3818366	Pv2.1_02_3818366_A/G	A	G	0.119297	0.0924242	330	0.129301	0.984438	1.28501
Pv2.1_02_9118496	Pv02	9118496	Pv2.1_02_9118496_C/T	C	T	0.119375	0.0742424	330	0.129298	0.984438	-1.6809
Pv2.1_01_5619923	Pv01	5619923	Pv2.1_01_5619923_A/G	A	G	0.119421	0.0712121	330	0.129296	0.984438	-1.57469
Pv2.1_04_30764123	Pv04	30764123	Pv2.1_04_30764123_A/G	A	G	0.119433	0.0909091	330	0.129296	0.984438	-1.48297
Pv2.1_02_49209518	Pv02	49209518	Pv2.1_02_49209518_T/C	T	C	0.119502	0.3	330	0.129293	0.984438	0.972782
Pv2.1_02_49209519	Pv02	49209519	Pv2.1_02_49209519_C/T	C	T	0.119502	0.3	330	0.129293	0.984438	-0.972782
Pv2.1_07_39420986	Pv07	39420986	Pv2.1_07_39420986_G/T	G	T	0.119612	0.298485	330	0.129289	0.984438	-0.884615
Pv2.1_10_41917845	Pv010	41917845	Pv2.1_10_41917845_A/C	A	C	0.119757	0.292424	330	0.129284	0.984438	-1.00054
Pv2.1_02_504284	Pv02	504284	Pv2.1_02_504284_A/G	A	G	0.119783	0.175758	330	0.129283	0.984438	1.01788
Pv2.1_05_38267022	Pv05	38267022	Pv2.1_05_38267022_T/A	T	A	0.120157	0.454545	330	0.12927	0.984438	-0.8104
Pv2.1_04_47087052	Pv04	47087052	Pv2.1_04_47087052_C/G	C	G	0.120162	0.175758	330	0.12927	0.984438	1.00412
Pv2.1_02_9118451	Pv02	9118451	Pv2.1_02_9118451_C/T	C	T	0.120374	0.0666667	330	0.129262	0.984438	-1.68944
Pv2.1_07_4078598	Pv07	4078598	Pv2.1_07_4078598_G/A	G	A	0.120431	0.0712121	330	0.12926	0.984438	-1.58452
Pv2.1_02_22731142	Pv02	22731142	Pv2.1_02_22731142_A/T	A	T	0.120533	0.110606	330	0.129257	0.984438	-1.6237
Pv2.1_04_8787305	Pv04	8787305	Pv2.1_04_8787305_A/C	A	C	0.120554	0.218182	330	0.129256	0.984438	-1.16049
Pv2.1_08_60779897	Pv08	60779897	Pv2.1_08_60779897_C/A	C	A	0.120883	0.186364	330	0.129244	0.984438	-1.46627
Pv2.1_02_16044541	Pv02	16044541	Pv2.1_02_16044541_A/G	A	G	0.120969	0.080303	330	0.129241	0.984438	-1.47768
Pv2.1_03_37060058	Pv03	37060058	Pv2.1_03_37060058_G/T	G	T	0.121188	0.0984848	330	0.129233	0.984438	-1.1708
Pv2.1_11_48931479	Pv011	48931479	Pv2.1_11_48931479_T/C	T	C	0.121227	0.142424	330	0.129232	0.984438	-1.51515
Pv2.1_04_541447	Pv04	541447	Pv2.1_04_541447_G/A	G	A	0.121439	0.186364	330	0.129225	0.984438	-1.31919
Pv2.1_02_47012013	Pv02	47012013	Pv2.1_02_47012013_C/A	C	A	0.121477	0.181818	330	0.129223	0.984438	-1.01089
Pv2.1_03_45563378	Pv03	45563378	Pv2.1_03_45563378_G/A	G	A	0.121559	0.0636364	330	0.12922	0.984438	-1.27299
Pv2.1_02_3197041	Pv02	3197041	Pv2.1_02_3197041_G/A	G	A	0.121561	0.216667	330	0.12922	0.984438	-0.973594
Pv2.1_05_172777	Pv05	172777	Pv2.1_05_172777_A/G	A	G	0.1216	0.140909	330	0.129219	0.984438	1.50524
Pv2.1_04_45445118	Pv04	45445118	Pv2.1_04_45445118_T/G	T	G	0.121698	0.316667	330	0.129216	0.984438	0.995992
Pv2.1_02_914618	Pv02	914618	Pv2.1_02_914618_C/A	C	A	0.121986	0.0636364	330	0.129206	0.984438	1.46858
Pv2.1_03_47209063	Pv03	47209063	Pv2.1_03_47209063_A/G	A	G	0.122468	0.19697	330	0.129189	0.984438	0.945982
Pv2.1_07_694646	Pv07	694646	Pv2.1_07_694646_G/A	G	A	0.122534	0.230303	330	0.129186	0.984438	1.29057
Pv2.1_02_43593461	Pv02	43593461	Pv2.1_02_43593461_C/T	C	T	0.122705	0.20303	330	0.129181	0.984438	-1.4196
Pv2.1_02_4585172	Pv02	4585172	Pv2.1_02_4585172_G/A	G	A	0.122715	0.228788	330	0.12918	0.984438	-1.14131
Pv2.1_09_13298989	Pv09	13298989	Pv2.1_09_13298989_T/C	T	C	0.122727	0.213636	330	0.12918	0.984438	-1.20986
Pv2.1_05_7449003	Pv05	7449003	Pv2.1_05_7449003_T/C	T	C	0.122729	0.0818182	330	0.12918	0.984438	1.39235
Pv2.1_06_24421394	Pv06	24421394	Pv2.1_06_24421394_A/G	A	G	0.12275	0.213636	330	0.129179	0.984438	-1.3503
Pv2.1_07_35524454	Pv07	35524454	Pv2.1_07_35524454_C/T	C	T	0.123023	0.0469697	330	0.12917	0.984438	-1.95181
Pv2.1_01_46338641	Pv01	46338641	Pv2.1_01_46338641_A/G	A	G	0.123067	0.198485	330	0.129168	0.984438	-1.42252
Pv2.1_03_44319494	Pv03	44319494	Pv2.1_03_44319494_T/C	T	C	0.123093	0.0984848	330	0.129167	0.984438	-1.4811
Pv2.1_11_9030681	Pv011	9030681	Pv2.1_11_9030681_A/G	A	G	0.123123	0.186364	330	0.129166	0.984438	1.02835
Pv2.1_04_45494244	Pv04	45494244	Pv2.1_04_45494244_G/A	G	A	0.12317	0.374242	330	0.129164	0.984438	0.994853
Pv2.1_07_28765295	Pv07	28765295	Pv2.1_07_28765295_G/A	G	A	0.123228	0.45303	330	0.129162	0.984438	0.813402
Pv2.1_02_2234953	Pv02	2234953	Pv2.1_02_2234953_T/G	T	G	0.12323	0.168182	330	0.129162	0.984438	-1.18056
Pv2.1_07_31558057	Pv07	31558057	Pv2.1_07_31558057_T/G	T	G	0.123274	0.157576	330	0.129161	0.984438	-1.05317
Pv2.1_03_40108557	Pv03	40108557	Pv2.1_03_40108557_A/T	A	T	0.123366	0.0469697	330	0.129158	0.984438	-1.61084
Pv2.1_11_48904271	Pv011	48904271	Pv2.1_11_48904271_C/G	C	G	0.123528	0.0636364	330	0.129152	0.984438	1.65914
Pv2.1_05_2788230	Pv05	2788230	Pv2.1_05_2788230_A/G	A	G	0.123609	0.131818	330	0.129149	0.984438	1.04862
Pv2.1_02_13946392	Pv02	13946392	Pv2.1_02_13946392_G/A	G	A	0.123828	0.0560606	330	0.129142	0.984438	1.73444
Pv2.1_08_60638729	Pv08	60638729	Pv2.1_08_60638729_A/G	A	G	0.12387	0.101515	330	0.12914	0.984438	1.22092
Pv2.1_04_47983772	Pv04	47983772	Pv2.1_04_47983772_A/G	A	G	0.123876	0.39697	330	0.12914	0.984438	-0.819563
Pv2.1_02_3254193	Pv02	3254193	Pv2.1_02_3254193_C/A	C	A	0.12388	0.133333	330	0.12914	0.984438	1.29985
Pv2.1_10_1805698	Pv010	1805698	Pv2.1_10_1805698_A/C	A	C	0.124153	0.0454545	330	0.129131	0.984438	-1.69072
Pv2.1_04_47982734	Pv04	47982734	Pv2.1_04_47982734_C/T	C	T	0.124303	0.401515	330	0.129126	0.984438	-0.824645
Pv2.1_01_47406032	Pv01	47406032	Pv2.1_01_47406032_T/A	T	A	0.124448	0.0742424	330	0.129121	0.984438	1.48469
Pv2.1_01_47405991	Pv01	47405991	Pv2.1_01_47405991_C/T	C	T	0.124448	0.0742424	330	0.129121	0.984438	-1.48469
Pv2.1_05_1647306	Pv05	1647306	Pv2.1_05_1647306_C/G	C	G	0.124574	0.187879	330	0.129116	0.984438	-0.883661
Pv2.1_07_38778044	Pv07	38778044	Pv2.1_07_38778044_A/G	A	G	0.124588	0.175758	330	0.129116	0.984438	-1.36829
Pv2.1_01_46289541	Pv01	46289541	Pv2.1_01_46289541_G/A	G	A	0.124768	0.0515152	330	0.12911	0.984438	1.65674
Pv2.1_09_13322314	Pv09	13322314	Pv2.1_09_13322314_C/T	C	T	0.125032	0.0742424	330	0.129101	0.984438	1.37329
Pv2.1_01_47406632	Pv01	47406632	Pv2.1_01_47406632_G/T	G	T	0.125085	0.168182	330	0.129099	0.984438	1.523
Pv2.1_02_47169208	Pv02	47169208	Pv2.1_02_47169208_A/G	A	G	0.125208	0.116667	330	0.129095	0.984438	1.39491
Pv2.1_02_44302213	Pv02	44302213	Pv2.1_02_44302213_T/C	T	C	0.125353	0.277273	330	0.12909	0.984438	1.02512
Pv2.1_03_42007027	Pv03	42007027	Pv2.1_03_42007027_G/A	G	A	0.125354	0.0727273	330	0.12909	0.984438	1.43682
Pv2.1_07_34547095	Pv07	34547095	Pv2.1_07_34547095_C/A	C	A	0.12543	0.2	330	0.129087	0.984438	-1.31466
Pv2.1_08_60076762	Pv08	60076762	Pv2.1_08_60076762_A/C	A	C	0.125461	0.0636364	330	0.129086	0.984438	1.77559
Pv2.1_04_150355	Pv04	150355	Pv2.1_04_150355_A/T	A	T	0.12578	0.413636	330	0.129075	0.984438	0.772044
Pv2.1_07_28343320	Pv07	28343320	Pv2.1_07_28343320_C/A	C	A	0.125885	0.0272727	330	0.129072	0.984438	2.23818
Pv2.1_07_28343336	Pv07	28343336	Pv2.1_07_28343336_T/C	T	C	0.125885	0.0272727	330	0.129072	0.984438	2.23818
Pv2.1_02_46287738	Pv02	46287738	Pv2.1_02_46287738_G/T	G	T	0.125949	0.14697	330	0.12907	0.984438	1.18647
Pv2.1_11_53419997	Pv011	53419997	Pv2.1_11_53419997_T/C	T	C	0.126096	0.271212	330	0.129065	0.984438	0.919192
Pv2.1_08_60442718	Pv08	60442718	Pv2.1_08_60442718_T/C	T	C	0.126922	0.0590909	330	0.129037	0.984438	-1.8398
Pv2.1_03_44160851	Pv03	44160851	Pv2.1_03_44160851_G/A	G	A	0.126934	0.298485	330	0.129037	0.984438	1.02456
Pv2.1_11_11643010	Pv011	11643010	Pv2.1_11_11643010_C/T	C	T	0.126968	0.433333	330	0.129035	0.984438	0.873042
Pv2.1_02_42035591	Pv02	42035591	Pv2.1_02_42035591_G/C	G	C	0.127108	0.322727	330	0.129031	0.984438	1.07561
Pv2.1_10_41922443	Pv010	41922443	Pv2.1_10_41922443_C/T	C	T	0.127193	0.137879	330	0.129028	0.984438	1.33578
Pv2.1_10_42388084	Pv010	42388084	Pv2.1_10_42388084_T/C	T	C	0.127195	0.0954545	330	0.129028	0.984438	-1.36168
Pv2.1_11_1248735	Pv011	1248735	Pv2.1_11_1248735_C/T	C	T	0.127319	0.131818	330	0.129024	0.984438	1.31505
Pv2.1_01_47114093	Pv01	47114093	Pv2.1_01_47114093_A/G	A	G	0.127355	0.0727273	330	0.129023	0.984438	-1.41769
Pv2.1_02_43593453	Pv02	43593453	Pv2.1_02_43593453_A/G	A	G	0.127482	0.204545	330	0.129018	0.984438	-1.39806
Pv2.1_02_1335901	Pv02	1335901	Pv2.1_02_1335901_C/G	C	G	0.127519	0.137879	330	0.129017	0.984438	1.08196
Pv2.1_04_43128368	Pv04	43128368	Pv2.1_04_43128368_T/G	T	G	0.127538	0.434848	330	0.129016	0.984438	0.797254
Pv2.1_02_44614831	Pv02	44614831	Pv2.1_02_44614831_A/C	A	C	0.127546	0.171212	330	0.129016	0.984438	-1.61443
Pv2.1_01_46129744	Pv01	46129744	Pv2.1_01_46129744_T/C	T	C	0.127753	0.0530303	330	0.129009	0.984438	2.0311
Pv2.1_02_40047250	Pv02	40047250	Pv2.1_02_40047250_A/T	A	T	0.12779	0.14697	330	0.129008	0.984438	1.21999
Pv2.1_09_7580835	Pv09	7580835	Pv2.1_09_7580835_G/C	G	C	0.127976	0.181818	330	0.129002	0.984438	-1.32791
Pv2.1_03_42523365	Pv03	42523365	Pv2.1_03_42523365_T/C	T	C	0.127991	0.3	330	0.129001	0.984438	0.725972
Pv2.1_04_2110777	Pv04	2110777	Pv2.1_04_2110777_C/T	C	T	0.128008	0.192424	330	0.129001	0.984438	-1.13959
Pv2.1_08_27115121	Pv08	27115121	Pv2.1_08_27115121_C/T	C	T	0.128172	0.148485	330	0.128995	0.984438	-1.10653
Pv2.1_10_22669991	Pv010	22669991	Pv2.1_10_22669991_T/C	T	C	0.128184	0.187879	330	0.128995	0.984438	1.17629
Pv2.1_04_541085	Pv04	541085	Pv2.1_04_541085_T/C	T	C	0.128362	0.136364	330	0.128989	0.984438	-1.07437
Pv2.1_10_42570017	Pv010	42570017	Pv2.1_10_42570017_G/A	G	A	0.128507	0.128788	330	0.128984	0.984438	1.18431
Pv2.1_02_3254056	Pv02	3254056	Pv2.1_02_3254056_A/G	A	G	0.128507	0.0575758	330	0.128984	0.984438	-1.84664
Pv2.1_09_10194016	Pv09	10194016	Pv2.1_09_10194016_G/A	G	A	0.128801	0.0318182	330	0.128975	0.984438	-2.22401
Pv2.1_08_61891712	Pv08	61891712	Pv2.1_08_61891712_T/G	T	G	0.128877	0.321212	330	0.128972	0.984438	0.946268
Pv2.1_10_39020691	Pv010	39020691	Pv2.1_10_39020691_T/C	T	C	0.128936	0.360606	330	0.12897	0.984438	0.823256
Pv2.1_03_45612106	Pv03	45612106	Pv2.1_03_45612106_C/A	C	A	0.128961	0.122727	330	0.12897	0.984438	1.2632
Pv2.1_10_42159496	Pv010	42159496	Pv2.1_10_42159496_G/C	G	C	0.128982	0.312121	330	0.128969	0.984438	-0.901345
Pv2.1_05_40443863	Pv05	40443863	Pv2.1_05_40443863_G/C	G	C	0.129235	0.483333	330	0.128961	0.984438	0.638302
Pv2.1_05_22406424	Pv05	22406424	Pv2.1_05_22406424_A/G	A	G	0.129431	0.172727	330	0.128954	0.984438	1.18242
Pv2.1_04_39643811	Pv04	39643811	Pv2.1_04_39643811_T/C	T	C	0.129563	0.418182	330	0.12895	0.984438	0.993322
Pv2.1_09_8946438	Pv09	8946438	Pv2.1_09_8946438_A/C	A	C	0.129569	0.4	330	0.12895	0.984438	0.801878
Pv2.1_09_38003385	Pv09	38003385	Pv2.1_09_38003385_A/G	A	G	0.129597	0.0742424	330	0.128949	0.984438	-1.75433
Pv2.1_07_3919518	Pv07	3919518	Pv2.1_07_3919518_G/A	G	A	0.129792	0.377273	330	0.128942	0.984438	-0.714072
Pv2.1_03_50652721	Pv03	50652721	Pv2.1_03_50652721_A/G	A	G	0.13001	0.257576	330	0.128935	0.984438	-0.951667
Pv2.1_02_48755228	Pv02	48755228	Pv2.1_02_48755228_G/A	G	A	0.130018	0.193939	330	0.128935	0.984438	0.920862
Pv2.1_06_2925087	Pv06	2925087	Pv2.1_06_2925087_G/A	G	A	0.130169	0.080303	330	0.12893	0.984438	1.35559
Pv2.1_03_52335925	Pv03	52335925	Pv2.1_03_52335925_C/T	C	T	0.130218	0.310606	330	0.128929	0.984438	0.778745
Pv2.1_10_44067565	Pv010	44067565	Pv2.1_10_44067565_T/G	T	G	0.130339	0.0439394	330	0.128925	0.984438	1.6724
Pv2.1_09_13240797	Pv09	13240797	Pv2.1_09_13240797_T/C	T	C	0.130523	0.0590909	330	0.128919	0.984438	-1.44499
Pv2.1_09_37619349	Pv09	37619349	Pv2.1_09_37619349_T/C	T	C	0.130553	0.116667	330	0.128918	0.984438	1.28451
Pv2.1_02_2041056	Pv02	2041056	Pv2.1_02_2041056_C/T	C	T	0.130657	0.280303	330	0.128914	0.984438	0.803865
Pv2.1_09_11985563	Pv09	11985563	Pv2.1_09_11985563_C/T	C	T	0.130822	0.0757576	330	0.128909	0.984438	-1.21586
Pv2.1_08_61266490	Pv08	61266490	Pv2.1_08_61266490_T/A	T	A	0.130889	0.2	330	0.128907	0.984438	-1.11658
Pv2.1_02_39417365	Pv02	39417365	Pv2.1_02_39417365_T/C	T	C	0.130944	0.0439394	330	0.128905	0.984438	1.37437
Pv2.1_04_47396128	Pv04	47396128	Pv2.1_04_47396128_C/A	C	A	0.130971	0.0666667	330	0.128904	0.984438	-1.14736
Pv2.1_07_5544490	Pv07	5544490	Pv2.1_07_5544490_G/A	G	A	0.131007	0.0742424	330	0.128903	0.984438	-1.97434
Pv2.1_02_959140	Pv02	959140	Pv2.1_02_959140_C/T	C	T	0.131058	0.193939	330	0.128901	0.984438	1.11196
Pv2.1_05_36639587	Pv05	36639587	Pv2.1_05_36639587_C/G	C	G	0.13118	0.45303	330	0.128897	0.984438	0.847483
Pv2.1_02_22731245	Pv02	22731245	Pv2.1_02_22731245_G/A	G	A	0.131188	0.0681818	330	0.128897	0.984438	1.61924
Pv2.1_02_34667949	Pv02	34667949	Pv2.1_02_34667949_T/G	T	G	0.131254	0.177273	330	0.128895	0.984438	1.0258
Pv2.1_02_3573635	Pv02	3573635	Pv2.1_02_3573635_G/A	G	A	0.131339	0.0893939	330	0.128892	0.984438	-1.21326
Pv2.1_08_60442686	Pv08	60442686	Pv2.1_08_60442686_C/T	C	T	0.131365	0.0590909	330	0.128891	0.984438	1.76103
Pv2.1_03_45925934	Pv03	45925934	Pv2.1_03_45925934_C/G	C	G	0.131367	0.134848	330	0.128891	0.984438	-1.0749
Pv2.1_07_36725690	Pv07	36725690	Pv2.1_07_36725690_C/G	C	G	0.131395	0.34697	330	0.128891	0.984438	0.691889
Pv2.1_02_3573540	Pv02	3573540	Pv2.1_02_3573540_A/G	A	G	0.131483	0.0863636	330	0.128888	0.984438	1.26268
Pv2.1_02_47286112	Pv02	47286112	Pv2.1_02_47286112_C/T	C	T	0.131765	0.107576	330	0.128879	0.984438	1.2365
Pv2.1_08_60277797	Pv08	60277797	Pv2.1_08_60277797_G/A	G	A	0.131944	0.259091	330	0.128873	0.984438	0.900153
Pv2.1_02_871566	Pv02	871566	Pv2.1_02_871566_G/C	G	C	0.132034	0.0757576	330	0.12887	0.984438	1.40172
Pv2.1_06_21423592	Pv06	21423592	Pv2.1_06_21423592_T/C	T	C	0.132076	0.251515	330	0.128869	0.984438	-0.767569
Pv2.1_04_43913185	Pv04	43913185	Pv2.1_04_43913185_C/A	C	A	0.132229	0.268182	330	0.128864	0.984438	0.704979
Pv2.1_04_45494567	Pv04	45494567	Pv2.1_04_45494567_G/T	G	T	0.132396	0.312121	330	0.128858	0.984438	-0.950561
Pv2.1_07_1912976	Pv07	1912976	Pv2.1_07_1912976_T/C	T	C	0.132414	0.107576	330	0.128858	0.984438	-1.48179
Pv2.1_05_7234907	Pv05	7234907	Pv2.1_05_7234907_G/A	G	A	0.132427	0.030303	330	0.128857	0.984438	2.45922
Pv2.1_05_7234906	Pv05	7234906	Pv2.1_05_7234906_A/G	A	G	0.132427	0.030303	330	0.128857	0.984438	-2.45922
Pv2.1_05_7094784	Pv05	7094784	Pv2.1_05_7094784_C/T	C	T	0.132493	0.0515152	330	0.128855	0.984438	-1.92085
Pv2.1_05_39440526	Pv05	39440526	Pv2.1_05_39440526_C/T	C	T	0.132567	0.134848	330	0.128853	0.984438	-1.52575
Pv2.1_11_41583351	Pv011	41583351	Pv2.1_11_41583351_A/G	A	G	0.13276	0.193939	330	0.128847	0.984438	-1.39476
Pv2.1_07_5907266	Pv07	5907266	Pv2.1_07_5907266_G/A	G	A	0.132802	0.24697	330	0.128846	0.984438	-0.636341
Pv2.1_02_27075353	Pv02	27075353	Pv2.1_02_27075353_A/T	A	T	0.132826	0.0939394	330	0.128845	0.984438	-1.56373
Pv2.1_11_1686430	Pv011	1686430	Pv2.1_11_1686430_G/A	G	A	0.13304	0.0393939	330	0.128838	0.985247	1.56316
Pv2.1_02_49099076	Pv02	49099076	Pv2.1_02_49099076_C/T	C	T	0.133225	0.266667	330	0.128832	0.985751	-0.971156
Pv2.1_04_43913149	Pv04	43913149	Pv2.1_04_43913149_C/G	C	G	0.133317	0.407576	330	0.128829	0.985751	-0.660642
Pv2.1_07_3518929	Pv07	3518929	Pv2.1_07_3518929_T/C	T	C	0.133444	0.187879	330	0.128825	0.985791	1.17624
Pv2.1_10_38137023	Pv010	38137023	Pv2.1_10_38137023_T/C	T	C	0.133595	0.0469697	330	0.12882	0.985791	-1.71708
Pv2.1_03_38235279	Pv03	38235279	Pv2.1_03_38235279_A/G	A	G	0.133702	0.137879	330	0.128817	0.985791	-1.42189
Pv2.1_09_9952833	Pv09	9952833	Pv2.1_09_9952833_T/C	T	C	0.133828	0.101515	330	0.128813	0.985791	-1.4503
Pv2.1_07_39363646	Pv07	39363646	Pv2.1_07_39363646_A/G	A	G	0.133871	0.393939	330	0.128812	0.985791	0.699785
Pv2.1_03_40971984	Pv03	40971984	Pv2.1_03_40971984_T/G	T	G	0.134297	0.177273	330	0.128798	0.985791	1.05224
Pv2.1_05_5652515	Pv05	5652515	Pv2.1_05_5652515_G/A	G	A	0.13431	0.0530303	330	0.128798	0.985791	1.8781
Pv2.1_08_61176576	Pv08	61176576	Pv2.1_08_61176576_T/A	T	A	0.134366	0.201515	330	0.128796	0.985791	-1.45929
Pv2.1_05_402774	Pv05	402774	Pv2.1_05_402774_G/A	G	A	0.134466	0.133333	330	0.128793	0.985791	-1.10799
Pv2.1_09_10480443	Pv09	10480443	Pv2.1_09_10480443_T/C	T	C	0.134478	0.233333	330	0.128793	0.985791	1.00718
Pv2.1_02_45719395	Pv02	45719395	Pv2.1_02_45719395_A/G	A	G	0.13464	0.401515	330	0.128788	0.985791	0.828747
Pv2.1_04_46880213	Pv04	46880213	Pv2.1_04_46880213_A/G	A	G	0.134987	0.0424242	330	0.128777	0.985791	1.4586
Pv2.1_07_184363	Pv07	184363	Pv2.1_07_184363_G/A	G	A	0.135146	0.243939	330	0.128772	0.985791	1.07245
Pv2.1_04_4571471	Pv04	4571471	Pv2.1_04_4571471_C/T	C	T	0.135263	0.0545455	330	0.128768	0.985791	1.71392
Pv2.1_05_9250689	Pv05	9250689	Pv2.1_05_9250689_A/C	A	C	0.135428	0.121212	330	0.128763	0.985791	-1.47525
Pv2.1_01_46338666	Pv01	46338666	Pv2.1_01_46338666_T/A	T	A	0.135525	0.171212	330	0.12876	0.985791	-1.13527
Pv2.1_07_36237607	Pv07	36237607	Pv2.1_07_36237607_T/C	T	C	0.135599	0.483333	330	0.128758	0.985791	0.691745
Pv2.1_07_4174317	Pv07	4174317	Pv2.1_07_4174317_T/G	T	G	0.135633	0.216667	330	0.128757	0.985791	-1.17274
Pv2.1_06_28554279	Pv06	28554279	Pv2.1_06_28554279_A/G	A	G	0.135664	0.0651515	330	0.128756	0.985791	-1.16049
Pv2.1_04_150354	Pv04	150354	Pv2.1_04_150354_T/G	T	G	0.135818	0.412121	330	0.128751	0.985791	-0.736334
Pv2.1_02_25196963	Pv02	25196963	Pv2.1_02_25196963_A/G	A	G	0.135936	0.0469697	330	0.128747	0.985791	1.9282
Pv2.1_03_39819948	Pv03	39819948	Pv2.1_03_39819948_G/A	G	A	0.136123	0.0424242	330	0.128742	0.985791	1.5522
Pv2.1_11_4787936	Pv011	4787936	Pv2.1_11_4787936_G/C	G	C	0.136235	0.0545455	330	0.128738	0.985791	1.65826
Pv2.1_04_506308	Pv04	506308	Pv2.1_04_506308_A/G	A	G	0.136339	0.301515	330	0.128735	0.985791	-0.894331
Pv2.1_04_2418560	Pv04	2418560	Pv2.1_04_2418560_A/C	A	C	0.136375	0.29697	330	0.128734	0.985791	0.793139
Pv2.1_02_169288	Pv02	169288	Pv2.1_02_169288_C/T	C	T	0.136412	0.15	330	0.128733	0.985791	-0.916314
Pv2.1_02_4070251	Pv02	4070251	Pv2.1_02_4070251_C/T	C	T	0.136464	0.115152	330	0.128731	0.985791	1.09029
Pv2.1_09_12098887	Pv09	12098887	Pv2.1_09_12098887_G/C	G	C	0.136814	0.0378788	330	0.12872	0.985791	-1.83678
Pv2.1_02_47116552	Pv02	47116552	Pv2.1_02_47116552_C/G	C	G	0.13687	0.206061	330	0.128719	0.985791	1.29378
Pv2.1_10_42159446	Pv010	42159446	Pv2.1_10_42159446_A/G	A	G	0.136906	0.30303	330	0.128717	0.985791	0.911235
Pv2.1_04_7718517	Pv04	7718517	Pv2.1_04_7718517_A/C	A	C	0.137358	0.293939	330	0.128704	0.985791	1.02656
Pv2.1_09_11367690	Pv09	11367690	Pv2.1_09_11367690_C/T	C	T	0.137363	0.030303	330	0.128704	0.985791	1.97825
Pv2.1_08_29844172	Pv08	29844172	Pv2.1_08_29844172_T/A	T	A	0.137392	0.113636	330	0.128703	0.985791	-1.20034
Pv2.1_04_45289110	Pv04	45289110	Pv2.1_04_45289110_T/C	T	C	0.137519	0.306061	330	0.128699	0.985791	1.03114
Pv2.1_02_29725880	Pv02	29725880	Pv2.1_02_29725880_T/C	T	C	0.137556	0.168182	330	0.128698	0.985791	1.05728
Pv2.1_05_37923697	Pv05	37923697	Pv2.1_05_37923697_A/T	A	T	0.137631	0.0454545	330	0.128695	0.985791	-1.60275
Pv2.1_07_4824001	Pv07	4824001	Pv2.1_07_4824001_C/G	C	G	0.137963	0.436364	330	0.128685	0.985791	-0.878378
Pv2.1_11_53429316	Pv011	53429316	Pv2.1_11_53429316_T/C	T	C	0.138054	0.301515	330	0.128682	0.985791	0.972919
Pv2.1_07_37473665	Pv07	37473665	Pv2.1_07_37473665_C/G	C	G	0.138234	0.24697	330	0.128677	0.985791	1.1464
Pv2.1_02_24578193	Pv02	24578193	Pv2.1_02_24578193_C/G	C	G	0.138568	0.0742424	330	0.128667	0.985791	-1.44074
Pv2.1_10_43615443	Pv010	43615443	Pv2.1_10_43615443_T/A	T	A	0.138613	0.139394	330	0.128665	0.985791	1.34136
Pv2.1_04_45088492	Pv04	45088492	Pv2.1_04_45088492_G/A	G	A	0.138902	0.236364	330	0.128657	0.985791	-1.13665
Pv2.1_09_13211762	Pv09	13211762	Pv2.1_09_13211762_A/G	A	G	0.138995	0.113636	330	0.128654	0.985791	1.00323
Pv2.1_09_7216775	Pv09	7216775	Pv2.1_09_7216775_G/A	G	A	0.139061	0.190909	330	0.128652	0.985791	-1.21565
Pv2.1_02_49204987	Pv02	49204987	Pv2.1_02_49204987_T/G	T	G	0.1391	0.272727	330	0.128651	0.985791	0.990354
Pv2.1_02_44965340	Pv02	44965340	Pv2.1_02_44965340_A/T	A	T	0.139153	0.0787879	330	0.128649	0.985791	-1.34174
Pv2.1_08_29986004	Pv08	29986004	Pv2.1_08_29986004_G/C	G	C	0.139155	0.175758	330	0.128649	0.985791	-1.17322
Pv2.1_08_62939661	Pv08	62939661	Pv2.1_08_62939661_C/G	C	G	0.139613	0.271212	330	0.128635	0.985791	0.851088
Pv2.1_06_27657075	Pv06	27657075	Pv2.1_06_27657075_G/A	G	A	0.139625	0.190909	330	0.128635	0.985791	-1.3737
Pv2.1_02_48662193	Pv02	48662193	Pv2.1_02_48662193_G/A	G	A	0.139938	0.486364	330	0.128626	0.985791	-0.840147
Pv2.1_02_23980073	Pv02	23980073	Pv2.1_02_23980073_G/A	G	A	0.140226	0.115152	330	0.128617	0.985791	1.32238
Pv2.1_04_46804683	Pv04	46804683	Pv2.1_04_46804683_C/T	C	T	0.140233	0.15	330	0.128617	0.985791	0.753265
Pv2.1_10_1258809	Pv010	1258809	Pv2.1_10_1258809_C/G	C	G	0.140559	0.0787879	330	0.128607	0.985791	-1.32948
Pv2.1_07_4201607	Pv07	4201607	Pv2.1_07_4201607_C/A	C	A	0.140667	0.119697	330	0.128604	0.985791	-1.41392
Pv2.1_10_42780532	Pv010	42780532	Pv2.1_10_42780532_C/T	C	T	0.140673	0.180303	330	0.128604	0.985791	-1.10216
Pv2.1_11_47282439	Pv011	47282439	Pv2.1_11_47282439_C/A	C	A	0.140709	0.0454545	330	0.128603	0.985791	-1.59849
Pv2.1_08_114379	Pv08	114379	Pv2.1_08_114379_C/G	C	G	0.141039	0.271212	330	0.128593	0.985791	0.772215
Pv2.1_07_38986950	Pv07	38986950	Pv2.1_07_38986950_A/G	A	G	0.141042	0.475758	330	0.128593	0.985791	0.72011
Pv2.1_06_20251984	Pv06	20251984	Pv2.1_06_20251984_T/C	T	C	0.141053	0.189394	330	0.128592	0.985791	-1.23129
Pv2.1_07_25739607	Pv07	25739607	Pv2.1_07_25739607_T/C	T	C	0.141112	0.0484848	330	0.128591	0.985791	1.74248
Pv2.1_03_37210374	Pv03	37210374	Pv2.1_03_37210374_T/C	T	C	0.141193	0.0439394	330	0.128588	0.985791	1.81038
Pv2.1_01_4818952	Pv01	4818952	Pv2.1_01_4818952_T/C	T	C	0.141465	0.0530303	330	0.12858	0.985791	1.83399
Pv2.1_02_3958286	Pv02	3958286	Pv2.1_02_3958286_A/T	A	T	0.141606	0.0909091	330	0.128576	0.985791	1.24764
Pv2.1_02_42818940	Pv02	42818940	Pv2.1_02_42818940_A/C	A	C	0.141806	0.221212	330	0.12857	0.985791	-1.11689
Pv2.1_04_47982718	Pv04	47982718	Pv2.1_04_47982718_A/C	A	C	0.142126	0.406061	330	0.128561	0.985791	-0.777934
Pv2.1_11_17152795	Pv011	17152795	Pv2.1_11_17152795_G/C	G	C	0.142292	0.0878788	330	0.128556	0.985791	-1.56035
Pv2.1_10_42843591	Pv010	42843591	Pv2.1_10_42843591_G/T	G	T	0.142341	0.140909	330	0.128554	0.985791	-1.48583
Pv2.1_07_39978063	Pv07	39978063	Pv2.1_07_39978063_T/G	T	G	0.142415	0.121212	330	0.128552	0.985791	1.11159
Pv2.1_09_15648185	Pv09	15648185	Pv2.1_09_15648185_C/G	C	G	0.142448	0.154545	330	0.128551	0.985791	1.15475
Pv2.1_05_6597219	Pv05	6597219	Pv2.1_05_6597219_C/G	C	G	0.142457	0.181818	330	0.128551	0.985791	1.31009
Pv2.1_07_39730789	Pv07	39730789	Pv2.1_07_39730789_A/G	A	G	0.142591	0.284848	330	0.128547	0.985791	0.787744
Pv2.1_07_2401389	Pv07	2401389	Pv2.1_07_2401389_A/G	A	G	0.142823	0.136364	330	0.12854	0.985791	-1.16901
Pv2.1_11_3833859	Pv011	3833859	Pv2.1_11_3833859_T/A	T	A	0.14292	0.184848	330	0.128537	0.985791	-1.0033
Pv2.1_02_22242558	Pv02	22242558	Pv2.1_02_22242558_C/T	C	T	0.14305	0.192424	330	0.128534	0.985791	-1.10688
Pv2.1_03_42854544	Pv03	42854544	Pv2.1_03_42854544_T/A	T	A	0.143134	0.10303	330	0.128531	0.985791	-1.06515
Pv2.1_01_49613701	Pv01	49613701	Pv2.1_01_49613701_T/G	T	G	0.143193	0.20303	330	0.128529	0.985791	-1.22138
Pv2.1_04_47380525	Pv04	47380525	Pv2.1_04_47380525_C/T	C	T	0.143368	0.157576	330	0.128524	0.985791	0.969719
Pv2.1_06_28033052	Pv06	28033052	Pv2.1_06_28033052_A/G	A	G	0.143518	0.0954545	330	0.12852	0.985791	-1.09572
Pv2.1_03_52508253	Pv03	52508253	Pv2.1_03_52508253_T/C	T	C	0.143537	0.113636	330	0.128519	0.985791	-1.2706
Pv2.1_09_7738333	Pv09	7738333	Pv2.1_09_7738333_G/T	G	T	0.143663	0.0742424	330	0.128516	0.985791	1.56198
Pv2.1_07_1248803	Pv07	1248803	Pv2.1_07_1248803_A/G	A	G	0.14368	0.0666667	330	0.128515	0.985791	-1.52536
Pv2.1_01_51167055	Pv01	51167055	Pv2.1_01_51167055_A/C	A	C	0.143721	0.124242	330	0.128514	0.985791	1.32709
Pv2.1_08_1994898	Pv08	1994898	Pv2.1_08_1994898_A/G	A	G	0.143727	0.190909	330	0.128514	0.985791	1.04263
Pv2.1_10_4664220	Pv010	4664220	Pv2.1_10_4664220_T/G	T	G	0.143819	0.163636	330	0.128511	0.985791	1.03223
Pv2.1_07_3919587	Pv07	3919587	Pv2.1_07_3919587_C/G	C	G	0.143887	0.475758	330	0.128509	0.985791	-0.890165
Pv2.1_03_42773297	Pv03	42773297	Pv2.1_03_42773297_G/A	G	A	0.143987	0.0863636	330	0.128506	0.985791	-1.20421
Pv2.1_10_42578186	Pv010	42578186	Pv2.1_10_42578186_A/T	A	T	0.144036	0.0757576	330	0.128505	0.985791	-1.33727
Pv2.1_09_32200489	Pv09	32200489	Pv2.1_09_32200489_A/G	A	G	0.144058	0.116667	330	0.128504	0.985791	0.849137
Pv2.1_10_43150845	Pv010	43150845	Pv2.1_10_43150845_A/T	A	T	0.14426	0.133333	330	0.128498	0.985791	-1.18038
Pv2.1_06_14965076	Pv06	14965076	Pv2.1_06_14965076_A/C	A	C	0.144475	0.457576	330	0.128492	0.985791	-0.617004
Pv2.1_05_36639586	Pv05	36639586	Pv2.1_05_36639586_T/A	T	A	0.144556	0.45	330	0.12849	0.985791	-0.824929
Pv2.1_08_61089243	Pv08	61089243	Pv2.1_08_61089243_T/C	T	C	0.144642	0.0666667	330	0.128487	0.985791	1.26397
Pv2.1_02_41973149	Pv02	41973149	Pv2.1_02_41973149_G/A	G	A	0.144781	0.262121	330	0.128483	0.985791	1.14316
Pv2.1_02_2868584	Pv02	2868584	Pv2.1_02_2868584_T/G	T	G	0.144823	0.106061	330	0.128482	0.985791	-1.28407
Pv2.1_03_38448106	Pv03	38448106	Pv2.1_03_38448106_C/T	C	T	0.144946	0.110606	330	0.128479	0.985791	-1.40874
Pv2.1_07_4819001	Pv07	4819001	Pv2.1_07_4819001_A/G	A	G	0.145051	0.234848	330	0.128476	0.985791	1.17603
Pv2.1_08_59115611	Pv08	59115611	Pv2.1_08_59115611_T/C	T	C	0.145096	0.157576	330	0.128474	0.985791	-1.16376
Pv2.1_11_3840187	Pv011	3840187	Pv2.1_11_3840187_G/A	G	A	0.145233	0.265152	330	0.12847	0.985791	-0.859646
Pv2.1_11_1210763	Pv011	1210763	Pv2.1_11_1210763_A/C	A	C	0.145308	0.0560606	330	0.128468	0.985791	1.61446
Pv2.1_02_43436990	Pv02	43436990	Pv2.1_02_43436990_T/C	T	C	0.145528	0.263636	330	0.128462	0.985791	0.857234
Pv2.1_02_43667614	Pv02	43667614	Pv2.1_02_43667614_A/T	A	T	0.145648	0.215152	330	0.128459	0.985791	-1.34735
Pv2.1_08_2509305	Pv08	2509305	Pv2.1_08_2509305_T/G	T	G	0.145654	0.0515152	330	0.128458	0.985791	1.55517
Pv2.1_05_40457313	Pv05	40457313	Pv2.1_05_40457313_G/A	G	A	0.14575	0.389394	330	0.128456	0.985791	0.67394
Pv2.1_08_61176580	Pv08	61176580	Pv2.1_08_61176580_G/A	G	A	0.145798	0.2	330	0.128454	0.985791	-1.4611
Pv2.1_08_2156958	Pv08	2156958	Pv2.1_08_2156958_C/T	C	T	0.146095	0.0666667	330	0.128446	0.985791	-1.18204
Pv2.1_05_40061041	Pv05	40061041	Pv2.1_05_40061041_A/G	A	G	0.146219	0.0454545	330	0.128442	0.985791	-1.47716
Pv2.1_09_11919230	Pv09	11919230	Pv2.1_09_11919230_G/C	G	C	0.14643	0.142424	330	0.128436	0.985791	-1.28051
Pv2.1_01_36018509	Pv01	36018509	Pv2.1_01_36018509_T/C	T	C	0.146679	0.230303	330	0.128429	0.985791	1.06265
Pv2.1_03_42523338	Pv03	42523338	Pv2.1_03_42523338_A/G	A	G	0.147557	0.195455	330	0.128404	0.985791	1.00782
Pv2.1_08_60638710	Pv08	60638710	Pv2.1_08_60638710_G/T	G	T	0.147744	0.0818182	330	0.128399	0.985791	-1.2629
Pv2.1_09_6248457	Pv09	6248457	Pv2.1_09_6248457_C/A	C	A	0.14807	0.0712121	330	0.12839	0.985791	-1.40142
Pv2.1_11_48617253	Pv011	48617253	Pv2.1_11_48617253_T/C	T	C	0.148137	0.0712121	330	0.128388	0.985791	-1.52796
Pv2.1_08_62972268	Pv08	62972268	Pv2.1_08_62972268_A/G	A	G	0.148182	0.177273	330	0.128387	0.985791	0.994653
Pv2.1_07_1218084	Pv07	1218084	Pv2.1_07_1218084_A/T	A	T	0.148273	0.0863636	330	0.128384	0.985791	-1.50045
Pv2.1_05_7792111	Pv05	7792111	Pv2.1_05_7792111_G/A	G	A	0.148519	0.175758	330	0.128377	0.985791	-1.33481
Pv2.1_10_41988807	Pv010	41988807	Pv2.1_10_41988807_C/A	C	A	0.148583	0.130303	330	0.128376	0.985791	-1.09136
Pv2.1_08_706882	Pv08	706882	Pv2.1_08_706882_A/G	A	G	0.148618	0.3	330	0.128375	0.985791	0.828678
Pv2.1_03_37060012	Pv03	37060012	Pv2.1_03_37060012_A/G	A	G	0.148645	0.101515	330	0.128374	0.985791	-1.29468
Pv2.1_11_46991382	Pv011	46991382	Pv2.1_11_46991382_C/T	C	T	0.148706	0.448485	330	0.128372	0.985791	1.07885
Pv2.1_10_43496866	Pv010	43496866	Pv2.1_10_43496866_C/T	C	T	0.14873	0.19697	330	0.128371	0.985791	-1.26778
Pv2.1_04_33747303	Pv04	33747303	Pv2.1_04_33747303_A/G	A	G	0.148999	0.222727	330	0.128364	0.985791	-1.19391
Pv2.1_07_39621091	Pv07	39621091	Pv2.1_07_39621091_C/T	C	T	0.149009	0.243939	330	0.128364	0.985791	0.966557
Pv2.1_08_61728874	Pv08	61728874	Pv2.1_08_61728874_T/A	T	A	0.149079	0.343939	330	0.128362	0.985791	-0.747646
Pv2.1_02_48290470	Pv02	48290470	Pv2.1_02_48290470_T/G	T	G	0.149295	0.437879	330	0.128356	0.985791	0.684629
Pv2.1_03_47089801	Pv03	47089801	Pv2.1_03_47089801_G/T	G	T	0.149319	0.106061	330	0.128355	0.985791	1.09543
Pv2.1_04_47605546	Pv04	47605546	Pv2.1_04_47605546_A/G	A	G	0.149327	0.125758	330	0.128355	0.985791	0.933344
Pv2.1_11_1349773	Pv011	1349773	Pv2.1_11_1349773_A/G	A	G	0.149341	0.0575758	330	0.128354	0.985791	-1.2934
Pv2.1_11_47215098	Pv011	47215098	Pv2.1_11_47215098_A/G	A	G	0.149389	0.468182	330	0.128353	0.985791	0.781919
Pv2.1_03_45538556	Pv03	45538556	Pv2.1_03_45538556_C/G	C	G	0.14943	0.165152	330	0.128352	0.985791	0.934585
Pv2.1_03_45538554	Pv03	45538554	Pv2.1_03_45538554_T/C	T	C	0.14943	0.165152	330	0.128352	0.985791	-0.934585
Pv2.1_03_47868731	Pv03	47868731	Pv2.1_03_47868731_A/G	A	G	0.14946	0.0424242	330	0.128351	0.985791	-1.58784
Pv2.1_06_27399070	Pv06	27399070	Pv2.1_06_27399070_G/A	G	A	0.149533	0.163636	330	0.128349	0.985791	-1.4217
Pv2.1_01_44604072	Pv01	44604072	Pv2.1_01_44604072_A/C	A	C	0.149643	0.287879	330	0.128346	0.985791	-0.791164
Pv2.1_11_49117884	Pv011	49117884	Pv2.1_11_49117884_G/A	G	A	0.149878	0.130303	330	0.128339	0.985791	1.13365
Pv2.1_01_47248327	Pv01	47248327	Pv2.1_01_47248327_G/C	G	C	0.150142	0.0651515	330	0.128332	0.985791	1.40986
Pv2.1_02_1039915	Pv02	1039915	Pv2.1_02_1039915_T/A	T	A	0.150244	0.113636	330	0.128329	0.985791	-1.25499
Pv2.1_03_41421993	Pv03	41421993	Pv2.1_03_41421993_A/G	A	G	0.150474	0.198485	330	0.128323	0.985791	-0.916134
Pv2.1_08_3329720	Pv08	3329720	Pv2.1_08_3329720_C/A	C	A	0.1506	0.0787879	330	0.12832	0.985791	1.14294
Pv2.1_01_47260168	Pv01	47260168	Pv2.1_01_47260168_G/A	G	A	0.150682	0.106061	330	0.128317	0.985791	1.45905
Pv2.1_02_31764350	Pv02	31764350	Pv2.1_02_31764350_T/C	T	C	0.150766	0.406061	330	0.128315	0.985791	-0.831851
Pv2.1_07_38947370	Pv07	38947370	Pv2.1_07_38947370_A/G	A	G	0.150873	0.175758	330	0.128312	0.985791	-1.03693
Pv2.1_07_4182164	Pv07	4182164	Pv2.1_07_4182164_A/T	A	T	0.151017	0.222727	330	0.128308	0.985791	1.13223
Pv2.1_07_4182165	Pv07	4182165	Pv2.1_07_4182165_T/C	T	C	0.151017	0.222727	330	0.128308	0.985791	-1.13223
Pv2.1_08_6172623	Pv08	6172623	Pv2.1_08_6172623_T/C	T	C	0.151043	0.125758	330	0.128307	0.985791	0.902619
Pv2.1_08_2007782	Pv08	2007782	Pv2.1_08_2007782_T/C	T	C	0.151126	0.106061	330	0.128305	0.985791	0.990543
Pv2.1_02_22729104	Pv02	22729104	Pv2.1_02_22729104_G/T	G	T	0.151204	0.0636364	330	0.128303	0.985791	-1.71143
Pv2.1_10_1821736	Pv010	1821736	Pv2.1_10_1821736_C/T	C	T	0.151246	0.0621212	330	0.128302	0.985791	-1.50955
Pv2.1_02_24411174	Pv02	24411174	Pv2.1_02_24411174_G/C	G	C	0.151308	0.0621212	330	0.1283	0.985791	1.58718
Pv2.1_08_61526760	Pv08	61526760	Pv2.1_08_61526760_G/T	G	T	0.151382	0.190909	330	0.128298	0.985791	1.10746
Pv2.1_09_29311037	Pv09	29311037	Pv2.1_09_29311037_G/T	G	T	0.151385	0.231818	330	0.128298	0.985791	0.948034
Pv2.1_05_39742359	Pv05	39742359	Pv2.1_05_39742359_T/A	T	A	0.151548	0.0242424	330	0.128294	0.985791	-1.69645
Pv2.1_02_504182	Pv02	504182	Pv2.1_02_504182_T/A	T	A	0.151556	0.121212	330	0.128293	0.985791	-1.05808
Pv2.1_02_21008555	Pv02	21008555	Pv2.1_02_21008555_G/A	G	A	0.151654	0.0863636	330	0.128291	0.985791	1.49357
Pv2.1_02_21008557	Pv02	21008557	Pv2.1_02_21008557_T/C	T	C	0.151654	0.0863636	330	0.128291	0.985791	1.49357
Pv2.1_04_45971750	Pv04	45971750	Pv2.1_04_45971750_T/C	T	C	0.152042	0.227273	330	0.12828	0.985791	-0.82517
Pv2.1_10_43366868	Pv010	43366868	Pv2.1_10_43366868_T/C	T	C	0.152047	0.193939	330	0.12828	0.985791	1.13612
Pv2.1_04_43220117	Pv04	43220117	Pv2.1_04_43220117_T/C	T	C	0.152154	0.0969697	330	0.128277	0.985791	-1.27766
Pv2.1_02_49544066	Pv02	49544066	Pv2.1_02_49544066_G/T	G	T	0.152172	0.457576	330	0.128277	0.985791	-0.698867
Pv2.1_05_36127029	Pv05	36127029	Pv2.1_05_36127029_T/C	T	C	0.152209	0.342424	330	0.128275	0.985791	-0.78767
Pv2.1_03_44976984	Pv03	44976984	Pv2.1_03_44976984_A/C	A	C	0.152224	0.0833333	330	0.128275	0.985791	-1.20536
Pv2.1_09_37752663	Pv09	37752663	Pv2.1_09_37752663_G/T	G	T	0.1524	0.0424242	330	0.12827	0.985791	-1.42654
Pv2.1_08_56138129	Pv08	56138129	Pv2.1_08_56138129_G/A	G	A	0.152476	0.113636	330	0.128268	0.985791	-0.829615
Pv2.1_11_48889909	Pv011	48889909	Pv2.1_11_48889909_G/A	G	A	0.152477	0.190909	330	0.128268	0.985791	-1.19725
Pv2.1_02_46437999	Pv02	46437999	Pv2.1_02_46437999_G/C	G	C	0.152644	0.324242	330	0.128264	0.985791	-0.869597
Pv2.1_03_47475238	Pv03	47475238	Pv2.1_03_47475238_C/T	C	T	0.152698	0.266667	330	0.128262	0.985791	-0.846998
Pv2.1_04_156715	Pv04	156715	Pv2.1_04_156715_A/G	A	G	0.152916	0.495455	330	0.128256	0.985791	0.711319
Pv2.1_04_4574788	Pv04	4574788	Pv2.1_04_4574788_A/G	A	G	0.152933	0.177273	330	0.128256	0.985791	1.04255
Pv2.1_07_2335713	Pv07	2335713	Pv2.1_07_2335713_T/C	T	C	0.153002	0.156061	330	0.128254	0.985791	1.54559
Pv2.1_04_46032147	Pv04	46032147	Pv2.1_04_46032147_T/C	T	C	0.153132	0.280303	330	0.12825	0.985791	-0.935356
Pv2.1_08_62240567	Pv08	62240567	Pv2.1_08_62240567_C/T	C	T	0.15318	0.151515	330	0.128249	0.985791	1.10746
Pv2.1_05_8547216	Pv05	8547216	Pv2.1_05_8547216_T/A	T	A	0.153353	0.0439394	330	0.128244	0.985791	1.63914
Pv2.1_02_38244055	Pv02	38244055	Pv2.1_02_38244055_G/A	G	A	0.153526	0.274242	330	0.12824	0.985791	0.94409
Pv2.1_04_46975156	Pv04	46975156	Pv2.1_04_46975156_A/T	A	T	0.153629	0.128788	330	0.128237	0.985791	1.09912
Pv2.1_06_28670815	Pv06	28670815	Pv2.1_06_28670815_T/C	T	C	0.153796	0.0681818	330	0.128233	0.985791	1.15376
Pv2.1_08_3071613	Pv08	3071613	Pv2.1_08_3071613_C/T	C	T	0.153842	0.0424242	330	0.128231	0.985791	-1.36235
Pv2.1_10_43229235	Pv010	43229235	Pv2.1_10_43229235_C/G	C	G	0.154	0.0727273	330	0.128227	0.985791	-1.24398
Pv2.1_08_44354061	Pv08	44354061	Pv2.1_08_44354061_G/A	G	A	0.15406	0.231818	330	0.128225	0.985791	-0.736342
Pv2.1_02_46587980	Pv02	46587980	Pv2.1_02_46587980_G/C	G	C	0.154233	0.337879	330	0.128221	0.985791	-0.791723
Pv2.1_02_518649	Pv02	518649	Pv2.1_02_518649_T/C	T	C	0.154263	0.118182	330	0.12822	0.985791	-0.996811
Pv2.1_02_518646	Pv02	518646	Pv2.1_02_518646_C/T	C	T	0.154263	0.118182	330	0.12822	0.985791	0.996811
Pv2.1_02_27981441	Pv02	27981441	Pv2.1_02_27981441_T/C	T	C	0.15433	0.0984848	330	0.128218	0.985791	1.39561
Pv2.1_07_35511684	Pv07	35511684	Pv2.1_07_35511684_C/T	C	T	0.154534	0.139394	330	0.128213	0.985791	-1.26504
Pv2.1_09_11156383	Pv09	11156383	Pv2.1_09_11156383_G/A	G	A	0.154749	0.0924242	330	0.128207	0.985791	1.0911
Pv2.1_03_51024259	Pv03	51024259	Pv2.1_03_51024259_T/G	T	G	0.154973	0.272727	330	0.128201	0.985791	-0.683141
Pv2.1_11_48786366	Pv011	48786366	Pv2.1_11_48786366_C/T	C	T	0.155249	0.0636364	330	0.128194	0.985791	1.44745
Pv2.1_06_27296952	Pv06	27296952	Pv2.1_06_27296952_T/A	T	A	0.155313	0.171212	330	0.128192	0.985791	-1.14239
Pv2.1_02_2551329	Pv02	2551329	Pv2.1_02_2551329_A/G	A	G	0.155729	0.124242	330	0.128181	0.985791	1.1614
Pv2.1_06_24415238	Pv06	24415238	Pv2.1_06_24415238_G/A	G	A	0.155908	0.0484848	330	0.128176	0.985791	1.6504
Pv2.1_04_4238666	Pv04	4238666	Pv2.1_04_4238666_C/T	C	T	0.155936	0.145455	330	0.128175	0.985791	1.35459
Pv2.1_11_1463408	Pv011	1463408	Pv2.1_11_1463408_A/G	A	G	0.155999	0.0484848	330	0.128174	0.985791	-1.45678
Pv2.1_08_61266468	Pv08	61266468	Pv2.1_08_61266468_C/T	C	T	0.156019	0.201515	330	0.128173	0.985791	1.04599
Pv2.1_03_53347824	Pv03	53347824	Pv2.1_03_53347824_C/T	C	T	0.156165	0.14697	330	0.128169	0.985791	-1.0581
Pv2.1_04_170098	Pv04	170098	Pv2.1_04_170098_C/A	C	A	0.156425	0.1	330	0.128163	0.985791	1.05176
Pv2.1_04_170119	Pv04	170119	Pv2.1_04_170119_A/G	A	G	0.156425	0.1	330	0.128163	0.985791	-1.05176
Pv2.1_05_1783007	Pv05	1783007	Pv2.1_05_1783007_T/C	T	C	0.156439	0.259091	330	0.128162	0.985791	-0.712333
Pv2.1_03_41799896	Pv03	41799896	Pv2.1_03_41799896_C/A	C	A	0.156713	0.259091	330	0.128155	0.985791	0.941036
Pv2.1_03_39290151	Pv03	39290151	Pv2.1_03_39290151_G/A	G	A	0.156953	0.119697	330	0.128149	0.985791	1.23369
Pv2.1_07_295394	Pv07	295394	Pv2.1_07_295394_G/C	G	C	0.156999	0.312121	330	0.128147	0.985791	-0.789296
Pv2.1_02_48664737	Pv02	48664737	Pv2.1_02_48664737_C/T	C	T	0.157089	0.465152	330	0.128145	0.985791	0.746343
Pv2.1_04_40885851	Pv04	40885851	Pv2.1_04_40885851_A/G	A	G	0.157412	0.262121	330	0.128137	0.985791	1.15557
Pv2.1_06_26972369	Pv06	26972369	Pv2.1_06_26972369_T/C	T	C	0.157518	0.139394	330	0.128134	0.985791	1.03803
Pv2.1_05_4324181	Pv05	4324181	Pv2.1_05_4324181_T/G	T	G	0.157642	0.0575758	330	0.128131	0.985791	-1.31835
Pv2.1_07_1149330	Pv07	1149330	Pv2.1_07_1149330_C/A	C	A	0.157681	0.142424	330	0.12813	0.985791	-1.3691
Pv2.1_03_36774155	Pv03	36774155	Pv2.1_03_36774155_T/C	T	C	0.157865	0.0651515	330	0.128125	0.985791	1.43614
Pv2.1_01_47629516	Pv01	47629516	Pv2.1_01_47629516_T/A	T	A	0.157898	0.0833333	330	0.128124	0.985791	1.34375
Pv2.1_07_28435332	Pv07	28435332	Pv2.1_07_28435332_A/C	A	C	0.157962	0.131818	330	0.128122	0.985791	0.844938
Pv2.1_01_49487561	Pv01	49487561	Pv2.1_01_49487561_T/C	T	C	0.158007	0.110606	330	0.128121	0.985791	-1.22449
Pv2.1_07_28532714	Pv07	28532714	Pv2.1_07_28532714_T/G	T	G	0.158089	0.0848485	330	0.128119	0.985791	-1.38565
Pv2.1_04_45948051	Pv04	45948051	Pv2.1_04_45948051_A/G	A	G	0.158153	0.198485	330	0.128117	0.985791	-0.775687
Pv2.1_03_41819859	Pv03	41819859	Pv2.1_03_41819859_T/C	T	C	0.158203	0.281818	330	0.128116	0.985791	-0.793425
Pv2.1_04_150352	Pv04	150352	Pv2.1_04_150352_T/G	T	G	0.158317	0.124242	330	0.128113	0.985791	0.918171
Pv2.1_04_30407008	Pv04	30407008	Pv2.1_04_30407008_A/G	A	G	0.158341	0.0939394	330	0.128112	0.985791	-1.41426
Pv2.1_05_6768486	Pv05	6768486	Pv2.1_05_6768486_A/T	A	T	0.158396	0.0318182	330	0.128111	0.985791	-2.25779
Pv2.1_03_43815608	Pv03	43815608	Pv2.1_03_43815608_G/A	G	A	0.158404	0.365152	330	0.128111	0.985791	-0.731594
Pv2.1_04_46498040	Pv04	46498040	Pv2.1_04_46498040_A/G	A	G	0.158467	0.198485	330	0.128109	0.985791	-1.00398
Pv2.1_03_37735310	Pv03	37735310	Pv2.1_03_37735310_A/G	A	G	0.158756	0.148485	330	0.128102	0.985791	-1.17971
Pv2.1_03_39587975	Pv03	39587975	Pv2.1_03_39587975_A/G	A	G	0.1588	0.124242	330	0.1281	0.985791	-1.22667
Pv2.1_03_47089812	Pv03	47089812	Pv2.1_03_47089812_G/A	G	A	0.158853	0.104545	330	0.128099	0.985791	-1.07031
Pv2.1_08_2007779	Pv08	2007779	Pv2.1_08_2007779_C/G	C	G	0.158936	0.106061	330	0.128097	0.985791	-0.972001
Pv2.1_05_40060848	Pv05	40060848	Pv2.1_05_40060848_T/C	T	C	0.158984	0.0787879	330	0.128096	0.985791	1.05411
Pv2.1_02_40701541	Pv02	40701541	Pv2.1_02_40701541_A/G	A	G	0.159222	0.133333	330	0.128089	0.985791	-1.01431
Pv2.1_02_23956478	Pv02	23956478	Pv2.1_02_23956478_G/A	G	A	0.159276	0.10303	330	0.128088	0.985791	1.27195
Pv2.1_02_48755243	Pv02	48755243	Pv2.1_02_48755243_T/C	T	C	0.159378	0.198485	330	0.128085	0.985791	0.841013
Pv2.1_01_5335920	Pv01	5335920	Pv2.1_01_5335920_T/C	T	C	0.159552	0.0606061	330	0.128081	0.985791	1.73876
Pv2.1_10_6210446	Pv010	6210446	Pv2.1_10_6210446_T/C	T	C	0.159817	0.0984848	330	0.128074	0.985791	1.23481
Pv2.1_10_6210444	Pv010	6210444	Pv2.1_10_6210444_C/G	C	G	0.159817	0.0984848	330	0.128074	0.985791	-1.23481
Pv2.1_08_53271543	Pv08	53271543	Pv2.1_08_53271543_C/T	C	T	0.159933	0.169697	330	0.128071	0.985791	0.980911
Pv2.1_11_49117898	Pv011	49117898	Pv2.1_11_49117898_T/A	T	A	0.159944	0.131818	330	0.128071	0.985791	1.10741
Pv2.1_08_2868082	Pv08	2868082	Pv2.1_08_2868082_A/G	A	G	0.15998	0.139394	330	0.12807	0.985791	-1.11861
Pv2.1_03_41873850	Pv03	41873850	Pv2.1_03_41873850_G/T	G	T	0.160324	0.331818	330	0.128061	0.985791	0.911825
Pv2.1_03_2929467	Pv03	2929467	Pv2.1_03_2929467_G/A	G	A	0.160438	0.0484848	330	0.128058	0.985791	-1.63268
Pv2.1_01_49992491	Pv01	49992491	Pv2.1_01_49992491_T/C	T	C	0.160445	0.0969697	330	0.128058	0.985791	-1.18236
Pv2.1_04_8339950	Pv04	8339950	Pv2.1_04_8339950_A/G	A	G	0.160542	0.392424	330	0.128056	0.985791	0.974537
Pv2.1_01_44485536	Pv01	44485536	Pv2.1_01_44485536_T/C	T	C	0.160656	0.112121	330	0.128053	0.985791	0.864764
Pv2.1_05_38993890	Pv05	38993890	Pv2.1_05_38993890_A/C	A	C	0.160752	0.431818	330	0.12805	0.985791	0.715187
Pv2.1_02_48285548	Pv02	48285548	Pv2.1_02_48285548_C/G	C	G	0.160802	0.109091	330	0.128049	0.985791	1.28429
Pv2.1_01_47261903	Pv01	47261903	Pv2.1_01_47261903_C/T	C	T	0.161057	0.156061	330	0.128042	0.985791	1.17978
Pv2.1_07_33272094	Pv07	33272094	Pv2.1_07_33272094_T/C	T	C	0.161312	0.1	330	0.128036	0.985791	-1.21563
Pv2.1_04_8787245	Pv04	8787245	Pv2.1_04_8787245_G/T	G	T	0.16136	0.215152	330	0.128035	0.985791	-1.04336
Pv2.1_11_1248701	Pv011	1248701	Pv2.1_11_1248701_A/G	A	G	0.161399	0.130303	330	0.128034	0.985791	1.24009
Pv2.1_02_49490530	Pv02	49490530	Pv2.1_02_49490530_A/G	A	G	0.161637	0.39697	330	0.128028	0.985791	-0.771751
Pv2.1_05_18531701	Pv05	18531701	Pv2.1_05_18531701_A/T	A	T	0.161677	0.151515	330	0.128027	0.985791	1.25556
Pv2.1_04_150375	Pv04	150375	Pv2.1_04_150375_T/C	T	C	0.16182	0.418182	330	0.128023	0.985791	-0.679749
Pv2.1_04_44784976	Pv04	44784976	Pv2.1_04_44784976_G/A	G	A	0.161827	0.242424	330	0.128023	0.985791	-1.04722
Pv2.1_02_44059258	Pv02	44059258	Pv2.1_02_44059258_C/G	C	G	0.161829	0.172727	330	0.128023	0.985791	-1.33384
Pv2.1_04_2395745	Pv04	2395745	Pv2.1_04_2395745_T/C	T	C	0.161916	0.195455	330	0.128021	0.985791	1.07506
Pv2.1_07_5294455	Pv07	5294455	Pv2.1_07_5294455_C/T	C	T	0.16194	0.124242	330	0.12802	0.985791	1.52081
Pv2.1_04_3957256	Pv04	3957256	Pv2.1_04_3957256_C/G	C	G	0.162094	0.412121	330	0.128016	0.985791	-0.721322
Pv2.1_07_616817	Pv07	616817	Pv2.1_07_616817_C/T	C	T	0.162149	0.0393939	330	0.128015	0.985791	-1.89641
Pv2.1_04_45326924	Pv04	45326924	Pv2.1_04_45326924_A/T	A	T	0.162304	0.0484848	330	0.128011	0.985791	1.46906
Pv2.1_04_43299502	Pv04	43299502	Pv2.1_04_43299502_C/T	C	T	0.162315	0.177273	330	0.12801	0.985791	1.40149
Pv2.1_10_42277946	Pv010	42277946	Pv2.1_10_42277946_G/A	G	A	0.162359	0.0984848	330	0.128009	0.985791	-1.16754
Pv2.1_03_2580170	Pv03	2580170	Pv2.1_03_2580170_A/G	A	G	0.162432	0.0681818	330	0.128007	0.985791	1.49294
Pv2.1_02_48936819	Pv02	48936819	Pv2.1_02_48936819_C/T	C	T	0.162724	0.254545	330	0.128	0.985791	0.849323
Pv2.1_04_46100256	Pv04	46100256	Pv2.1_04_46100256_C/A	C	A	0.162732	0.3	330	0.128	0.985791	-0.814048
Pv2.1_11_2132639	Pv011	2132639	Pv2.1_11_2132639_G/A	G	A	0.162883	0.0878788	330	0.127996	0.985791	0.847237
Pv2.1_07_5826452	Pv07	5826452	Pv2.1_07_5826452_T/A	T	A	0.162993	0.107576	330	0.127993	0.985791	-1.65197
Pv2.1_05_7576701	Pv05	7576701	Pv2.1_05_7576701_C/T	C	T	0.163075	0.0530303	330	0.127991	0.985791	-1.91106
Pv2.1_02_46455507	Pv02	46455507	Pv2.1_02_46455507_G/C	G	C	0.163175	0.315152	330	0.127989	0.985791	-0.844867
Pv2.1_02_542087	Pv02	542087	Pv2.1_02_542087_G/T	G	T	0.163348	0.24697	330	0.127984	0.985791	-0.817153
Pv2.1_05_38217229	Pv05	38217229	Pv2.1_05_38217229_T/A	T	A	0.163373	0.0287879	330	0.127984	0.985791	1.6374
Pv2.1_07_425424	Pv07	425424	Pv2.1_07_425424_A/T	A	T	0.163508	0.187879	330	0.12798	0.985791	-0.98453
Pv2.1_09_37115520	Pv09	37115520	Pv2.1_09_37115520_C/A	C	A	0.163528	0.163636	330	0.12798	0.985791	1.1986
Pv2.1_01_49333544	Pv01	49333544	Pv2.1_01_49333544_G/T	G	T	0.163652	0.0727273	330	0.127977	0.985791	1.47505
Pv2.1_07_2893234	Pv07	2893234	Pv2.1_07_2893234_G/A	G	A	0.163696	0.115152	330	0.127976	0.985791	1.58757
Pv2.1_11_451596	Pv011	451596	Pv2.1_11_451596_G/A	G	A	0.163777	0.186364	330	0.127974	0.985791	1.05504
Pv2.1_07_594367	Pv07	594367	Pv2.1_07_594367_T/C	T	C	0.16378	0.127273	330	0.127974	0.985791	0.990184
Pv2.1_07_38987037	Pv07	38987037	Pv2.1_07_38987037_A/G	A	G	0.163904	0.495455	330	0.12797	0.985791	0.712865
Pv2.1_05_419160	Pv05	419160	Pv2.1_05_419160_G/A	G	A	0.164069	0.109091	330	0.127966	0.985791	-1.04901
Pv2.1_07_2893222	Pv07	2893222	Pv2.1_07_2893222_T/G	T	G	0.164254	0.118182	330	0.127962	0.985791	1.4958
Pv2.1_07_36965348	Pv07	36965348	Pv2.1_07_36965348_A/G	A	G	0.164739	0.195455	330	0.12795	0.985791	-0.92922
Pv2.1_09_15648201	Pv09	15648201	Pv2.1_09_15648201_A/T	A	T	0.16474	0.154545	330	0.12795	0.985791	1.09514
Pv2.1_10_42388125	Pv010	42388125	Pv2.1_10_42388125_C/T	C	T	0.164748	0.0772727	330	0.127949	0.985791	1.50284
Pv2.1_10_4946801	Pv010	4946801	Pv2.1_10_4946801_T/C	T	C	0.164784	0.15	330	0.127949	0.985791	1.043
Pv2.1_05_7576943	Pv05	7576943	Pv2.1_05_7576943_C/T	C	T	0.164853	0.0651515	330	0.127947	0.985791	-1.44098
Pv2.1_05_40676776	Pv05	40676776	Pv2.1_05_40676776_T/C	T	C	0.165016	0.140909	330	0.127943	0.985791	-1.14
Pv2.1_02_2683596	Pv02	2683596	Pv2.1_02_2683596_G/A	G	A	0.16532	0.183333	330	0.127935	0.985791	-1.06962
Pv2.1_03_37464971	Pv03	37464971	Pv2.1_03_37464971_G/T	G	T	0.165393	0.0606061	330	0.127933	0.985791	-1.64131
Pv2.1_02_667681	Pv02	667681	Pv2.1_02_667681_C/T	C	T	0.16558	0.219697	330	0.127929	0.985791	0.877399
Pv2.1_02_49453445	Pv02	49453445	Pv2.1_02_49453445_A/C	A	C	0.166216	0.225758	330	0.127913	0.985791	-1.00271
Pv2.1_03_51372397	Pv03	51372397	Pv2.1_03_51372397_C/T	C	T	0.166278	0.148485	330	0.127912	0.985791	0.97532
Pv2.1_09_37603730	Pv09	37603730	Pv2.1_09_37603730_G/A	G	A	0.166337	0.154545	330	0.12791	0.985791	1.01286
Pv2.1_01_48367969	Pv01	48367969	Pv2.1_01_48367969_C/T	C	T	0.166463	0.0984848	330	0.127907	0.985791	-1.24272
Pv2.1_09_38120967	Pv09	38120967	Pv2.1_09_38120967_A/G	A	G	0.166472	0.109091	330	0.127907	0.985791	-1.10671
Pv2.1_10_40936076	Pv010	40936076	Pv2.1_10_40936076_G/A	G	A	0.166566	0.180303	330	0.127904	0.985791	1.18454
Pv2.1_04_47055225	Pv04	47055225	Pv2.1_04_47055225_A/C	A	C	0.166594	0.245455	330	0.127904	0.985791	1.04791
Pv2.1_06_28554255	Pv06	28554255	Pv2.1_06_28554255_C/T	C	T	0.166623	0.0636364	330	0.127903	0.985791	-1.07946
Pv2.1_08_59267972	Pv08	59267972	Pv2.1_08_59267972_C/A	C	A	0.167077	0.216667	330	0.127892	0.985791	-0.916502
Pv2.1_04_3975264	Pv04	3975264	Pv2.1_04_3975264_C/T	C	T	0.167179	0.0424242	330	0.127889	0.985791	1.54017
Pv2.1_03_44160843	Pv03	44160843	Pv2.1_03_44160843_A/T	A	T	0.16729	0.278788	330	0.127887	0.985791	-0.982524
Pv2.1_01_46129773	Pv01	46129773	Pv2.1_01_46129773_C/A	C	A	0.167313	0.0545455	330	0.127886	0.985791	1.87487
Pv2.1_10_5039243	Pv010	5039243	Pv2.1_10_5039243_C/G	C	G	0.167326	0.177273	330	0.127886	0.985791	-0.859304
Pv2.1_01_46498415	Pv01	46498415	Pv2.1_01_46498415_T/G	T	G	0.167476	0.0530303	330	0.127882	0.985791	1.52527
Pv2.1_01_47582262	Pv01	47582262	Pv2.1_01_47582262_T/G	T	G	0.167593	0.160606	330	0.127879	0.985791	-1.07239
Pv2.1_04_44964469	Pv04	44964469	Pv2.1_04_44964469_C/T	C	T	0.167651	0.157576	330	0.127878	0.985791	1.05374
Pv2.1_01_50066623	Pv01	50066623	Pv2.1_01_50066623_T/G	T	G	0.167819	0.069697	330	0.127874	0.985791	-1.32671
Pv2.1_10_43151015	Pv010	43151015	Pv2.1_10_43151015_G/C	G	C	0.16783	0.131818	330	0.127874	0.985791	1.04247
Pv2.1_10_43151022	Pv010	43151022	Pv2.1_10_43151022_C/G	C	G	0.16783	0.131818	330	0.127874	0.985791	-1.04247
Pv2.1_02_44263008	Pv02	44263008	Pv2.1_02_44263008_C/T	C	T	0.167867	0.171212	330	0.127873	0.985791	-1.28379
Pv2.1_08_18668983	Pv08	18668983	Pv2.1_08_18668983_C/T	C	T	0.168154	0.080303	330	0.127866	0.985791	1.4666
Pv2.1_08_2233502	Pv08	2233502	Pv2.1_08_2233502_T/C	T	C	0.168263	0.157576	330	0.127863	0.985791	1.02106
Pv2.1_08_60442712	Pv08	60442712	Pv2.1_08_60442712_T/G	T	G	0.168344	0.0560606	330	0.127861	0.985791	-1.81075
Pv2.1_03_46837379	Pv03	46837379	Pv2.1_03_46837379_C/T	C	T	0.168505	0.0515152	330	0.127857	0.985791	1.33683
Pv2.1_10_42486871	Pv010	42486871	Pv2.1_10_42486871_A/G	A	G	0.168574	0.05	330	0.127856	0.985791	-1.41919
Pv2.1_02_48416861	Pv02	48416861	Pv2.1_02_48416861_A/G	A	G	0.16866	0.424242	330	0.127853	0.985791	0.849715
Pv2.1_06_24415263	Pv06	24415263	Pv2.1_06_24415263_G/A	G	A	0.168682	0.0515152	330	0.127853	0.985791	1.56663
Pv2.1_07_4078595	Pv07	4078595	Pv2.1_07_4078595_C/T	C	T	0.168877	0.0727273	330	0.127848	0.985791	1.36232
Pv2.1_03_51740416	Pv03	51740416	Pv2.1_03_51740416_T/A	T	A	0.169168	0.104545	330	0.127841	0.985791	-1.27136
Pv2.1_08_484735	Pv08	484735	Pv2.1_08_484735_C/T	C	T	0.169373	0.0636364	330	0.127836	0.985791	-1.40814
Pv2.1_07_4672333	Pv07	4672333	Pv2.1_07_4672333_T/C	T	C	0.169523	0.116667	330	0.127833	0.985791	-1.17805
Pv2.1_02_13946375	Pv02	13946375	Pv2.1_02_13946375_T/G	T	G	0.169601	0.0727273	330	0.127831	0.985791	1.42264
Pv2.1_03_43821527	Pv03	43821527	Pv2.1_03_43821527_C/T	C	T	0.16986	0.224242	330	0.127825	0.985791	-0.916187
Pv2.1_05_40588613	Pv05	40588613	Pv2.1_05_40588613_C/A	C	A	0.169881	0.0757576	330	0.127824	0.985791	1.12355
Pv2.1_05_778746	Pv05	778746	Pv2.1_05_778746_A/T	A	T	0.169909	0.330303	330	0.127823	0.985791	-0.873315
Pv2.1_08_61889751	Pv08	61889751	Pv2.1_08_61889751_C/G	C	G	0.169936	0.213636	330	0.127823	0.985791	0.907324
Pv2.1_05_36577850	Pv05	36577850	Pv2.1_05_36577850_T/C	T	C	0.170027	0.0545455	330	0.127821	0.985791	-1.39582
Pv2.1_09_18517396	Pv09	18517396	Pv2.1_09_18517396_C/A	C	A	0.170251	0.109091	330	0.127815	0.985791	-1.24927
Pv2.1_10_39289559	Pv010	39289559	Pv2.1_10_39289559_G/T	G	T	0.170412	0.390909	330	0.127811	0.985791	-0.813637
Pv2.1_03_47544402	Pv03	47544402	Pv2.1_03_47544402_C/A	C	A	0.170428	0.0833333	330	0.127811	0.985791	0.972456
Pv2.1_03_42140988	Pv03	42140988	Pv2.1_03_42140988_A/C	A	C	0.170597	0.115152	330	0.127807	0.985791	0.843177
Pv2.1_01_3930337	Pv01	3930337	Pv2.1_01_3930337_G/A	G	A	0.17065	0.122727	330	0.127806	0.985791	1.07559
Pv2.1_02_43806152	Pv02	43806152	Pv2.1_02_43806152_T/A	T	A	0.170805	0.221212	330	0.127802	0.985791	1.0588
Pv2.1_08_59268070	Pv08	59268070	Pv2.1_08_59268070_G/A	G	A	0.170888	0.240909	330	0.1278	0.985791	-1.04259
Pv2.1_03_51763568	Pv03	51763568	Pv2.1_03_51763568_T/G	T	G	0.170902	0.187879	330	0.1278	0.985791	-1.05172
Pv2.1_08_62895179	Pv08	62895179	Pv2.1_08_62895179_A/T	A	T	0.17092	0.295455	330	0.127799	0.985791	-0.848127
Pv2.1_08_773308	Pv08	773308	Pv2.1_08_773308_G/A	G	A	0.171063	0.324242	330	0.127796	0.985791	-0.776433
Pv2.1_07_28996873	Pv07	28996873	Pv2.1_07_28996873_T/G	T	G	0.171075	0.398485	330	0.127795	0.985791	-0.60038
Pv2.1_05_1031821	Pv05	1031821	Pv2.1_05_1031821_A/C	A	C	0.171237	0.298485	330	0.127792	0.985791	0.757643
Pv2.1_02_216579	Pv02	216579	Pv2.1_02_216579_C/G	C	G	0.171414	0.0818182	330	0.127787	0.985791	-1.328
Pv2.1_01_48364135	Pv01	48364135	Pv2.1_01_48364135_G/T	G	T	0.171444	0.162121	330	0.127787	0.985791	-1.17764
Pv2.1_04_45670868	Pv04	45670868	Pv2.1_04_45670868_C/A	C	A	0.171476	0.187879	330	0.127786	0.985791	-1.08743
Pv2.1_09_29311036	Pv09	29311036	Pv2.1_09_29311036_C/G	C	G	0.171482	0.227273	330	0.127786	0.985791	0.90388
Pv2.1_02_41815237	Pv02	41815237	Pv2.1_02_41815237_G/T	G	T	0.171632	0.0484848	330	0.127782	0.985791	-1.07054
Pv2.1_01_47261884	Pv01	47261884	Pv2.1_01_47261884_C/T	C	T	0.171711	0.157576	330	0.12778	0.985791	1.13861
Pv2.1_04_43896176	Pv04	43896176	Pv2.1_04_43896176_T/G	T	G	0.171732	0.393939	330	0.12778	0.985791	-0.747651
Pv2.1_07_3054767	Pv07	3054767	Pv2.1_07_3054767_C/G	C	G	0.171751	0.0848485	330	0.127779	0.985791	1.52078
Pv2.1_04_8044549	Pv04	8044549	Pv2.1_04_8044549_A/G	A	G	0.171785	0.169697	330	0.127779	0.985791	-1.0547
Pv2.1_06_27578573	Pv06	27578573	Pv2.1_06_27578573_C/G	C	G	0.171826	0.124242	330	0.127778	0.985791	-1.0494
Pv2.1_06_13990972	Pv06	13990972	Pv2.1_06_13990972_A/G	A	G	0.171941	0.3	330	0.127775	0.985791	0.897381
Pv2.1_07_362696	Pv07	362696	Pv2.1_07_362696_C/T	C	T	0.171963	0.0515152	330	0.127774	0.985791	-1.71995
Pv2.1_11_41682210	Pv011	41682210	Pv2.1_11_41682210_T/C	T	C	0.172426	0.0712121	330	0.127763	0.985791	0.973234
Pv2.1_03_43931475	Pv03	43931475	Pv2.1_03_43931475_T/C	T	C	0.17249	0.307576	330	0.127762	0.985791	-0.726022
Pv2.1_10_39064498	Pv010	39064498	Pv2.1_10_39064498_G/A	G	A	0.172608	0.339394	330	0.127759	0.985791	0.83974
Pv2.1_06_10948058	Pv06	10948058	Pv2.1_06_10948058_G/C	G	C	0.17272	0.148485	330	0.127757	0.985791	-1.06452
Pv2.1_05_39242027	Pv05	39242027	Pv2.1_05_39242027_T/C	T	C	0.17274	0.137879	330	0.127756	0.985791	0.889841
Pv2.1_10_3834489	Pv010	3834489	Pv2.1_10_3834489_A/G	A	G	0.173067	0.234848	330	0.127748	0.985791	0.806735
Pv2.1_06_26972341	Pv06	26972341	Pv2.1_06_26972341_C/A	C	A	0.17318	0.143939	330	0.127746	0.985791	1.05072
Pv2.1_07_1141565	Pv07	1141565	Pv2.1_07_1141565_G/A	G	A	0.173525	0.215152	330	0.127738	0.985791	0.934308
Pv2.1_11_45615110	Pv011	45615110	Pv2.1_11_45615110_A/G	A	G	0.173647	0.0575758	330	0.127735	0.985791	1.5087
Pv2.1_09_36112020	Pv09	36112020	Pv2.1_09_36112020_A/G	A	G	0.173804	0.110606	330	0.127731	0.985791	-0.840947
Pv2.1_08_59203266	Pv08	59203266	Pv2.1_08_59203266_T/A	T	A	0.173997	0.080303	330	0.127727	0.985791	-1.436
Pv2.1_10_4813678	Pv010	4813678	Pv2.1_10_4813678_A/C	A	C	0.17411	0.181818	330	0.127724	0.985791	-0.924591
Pv2.1_04_43247086	Pv04	43247086	Pv2.1_04_43247086_G/A	G	A	0.174244	0.121212	330	0.127721	0.985791	-1.28053
Pv2.1_11_5777172	Pv011	5777172	Pv2.1_11_5777172_A/G	A	G	0.174285	0.413636	330	0.12772	0.985791	0.681199
Pv2.1_02_3687278	Pv02	3687278	Pv2.1_02_3687278_A/G	A	G	0.174384	0.163636	330	0.127718	0.985791	0.864042
Pv2.1_02_34769213	Pv02	34769213	Pv2.1_02_34769213_T/A	T	A	0.17442	0.219697	330	0.127717	0.985791	0.830988
Pv2.1_07_34822098	Pv07	34822098	Pv2.1_07_34822098_G/T	G	T	0.174513	0.0742424	330	0.127715	0.985791	-1.33452
Pv2.1_11_1248848	Pv011	1248848	Pv2.1_11_1248848_T/C	T	C	0.174751	0.136364	330	0.127709	0.985791	1.08849
Pv2.1_04_43910017	Pv04	43910017	Pv2.1_04_43910017_T/A	T	A	0.17479	0.283333	330	0.127708	0.985791	0.871541
Pv2.1_04_47502110	Pv04	47502110	Pv2.1_04_47502110_A/G	A	G	0.174875	0.0863636	330	0.127706	0.985791	1.00225
Pv2.1_10_42844904	Pv010	42844904	Pv2.1_10_42844904_T/C	T	C	0.17508	0.206061	330	0.127701	0.985791	1.1429
Pv2.1_08_1994880	Pv08	1994880	Pv2.1_08_1994880_C/T	C	T	0.175158	0.190909	330	0.1277	0.985791	0.960382
Pv2.1_04_47236994	Pv04	47236994	Pv2.1_04_47236994_T/A	T	A	0.17524	0.110606	330	0.127698	0.985791	1.46605
Pv2.1_11_5992745	Pv011	5992745	Pv2.1_11_5992745_T/C	T	C	0.175421	0.0924242	330	0.127694	0.985791	-1.12066
Pv2.1_10_42602234	Pv010	42602234	Pv2.1_10_42602234_G/A	G	A	0.175514	0.0787879	330	0.127691	0.985791	1.32978
Pv2.1_07_4182152	Pv07	4182152	Pv2.1_07_4182152_T/A	T	A	0.175588	0.224242	330	0.12769	0.985791	-1.04602
Pv2.1_07_3919344	Pv07	3919344	Pv2.1_07_3919344_G/A	G	A	0.175652	0.463636	330	0.127688	0.985791	0.673659
Pv2.1_03_38226797	Pv03	38226797	Pv2.1_03_38226797_T/A	T	A	0.175789	0.0393939	330	0.127685	0.985791	1.5391
Pv2.1_04_46934061	Pv04	46934061	Pv2.1_04_46934061_C/T	C	T	0.175831	0.183333	330	0.127684	0.985791	0.851889
Pv2.1_07_28716768	Pv07	28716768	Pv2.1_07_28716768_A/G	A	G	0.175874	0.0409091	330	0.127683	0.985791	1.6069
Pv2.1_08_2022756	Pv08	2022756	Pv2.1_08_2022756_C/A	C	A	0.175874	0.157576	330	0.127683	0.985791	0.872486
Pv2.1_11_45016467	Pv011	45016467	Pv2.1_11_45016467_C/T	C	T	0.17589	0.0363636	330	0.127683	0.985791	1.7105
Pv2.1_06_27578532	Pv06	27578532	Pv2.1_06_27578532_A/T	A	T	0.1759	0.118182	330	0.127682	0.985791	-1.10952
Pv2.1_06_27578544	Pv06	27578544	Pv2.1_06_27578544_C/T	C	T	0.1759	0.118182	330	0.127682	0.985791	-1.10952
Pv2.1_09_36684513	Pv09	36684513	Pv2.1_09_36684513_T/C	T	C	0.175958	0.0924242	330	0.127681	0.985791	1.16752
Pv2.1_05_7534037	Pv05	7534037	Pv2.1_05_7534037_C/T	C	T	0.175987	0.0333333	330	0.12768	0.985791	-2.19002
Pv2.1_07_3582438	Pv07	3582438	Pv2.1_07_3582438_T/A	T	A	0.176135	0.165152	330	0.127677	0.985791	-0.80591
Pv2.1_01_51289615	Pv01	51289615	Pv2.1_01_51289615_T/C	T	C	0.176155	0.210606	330	0.127677	0.985791	-1.19447
Pv2.1_01_46169474	Pv01	46169474	Pv2.1_01_46169474_G/C	G	C	0.176213	0.0545455	330	0.127675	0.985791	1.66902
Pv2.1_02_3577186	Pv02	3577186	Pv2.1_02_3577186_G/T	G	T	0.176403	0.116667	330	0.127671	0.985791	0.949707
Pv2.1_02_47169178	Pv02	47169178	Pv2.1_02_47169178_A/G	A	G	0.176427	0.119697	330	0.12767	0.985791	1.11308
Pv2.1_02_23212465	Pv02	23212465	Pv2.1_02_23212465_T/A	T	A	0.176428	0.0560606	330	0.12767	0.985791	1.67965
Pv2.1_07_39793760	Pv07	39793760	Pv2.1_07_39793760_T/C	T	C	0.176477	0.274242	330	0.127669	0.985791	0.826024
Pv2.1_06_27578567	Pv06	27578567	Pv2.1_06_27578567_A/G	A	G	0.176504	0.119697	330	0.127669	0.985791	-1.06972
Pv2.1_01_45613507	Pv01	45613507	Pv2.1_01_45613507_C/T	C	T	0.176523	0.0893939	330	0.127668	0.985791	-1.57062
Pv2.1_07_29486421	Pv07	29486421	Pv2.1_07_29486421_T/G	T	G	0.176663	0.0333333	330	0.127665	0.985791	-1.71491
Pv2.1_10_42164255	Pv010	42164255	Pv2.1_10_42164255_A/T	A	T	0.176671	0.271212	330	0.127665	0.985791	0.87733
Pv2.1_08_7377249	Pv08	7377249	Pv2.1_08_7377249_C/T	C	T	0.176709	0.14697	330	0.127664	0.985791	-0.823426
Pv2.1_06_24415232	Pv06	24415232	Pv2.1_06_24415232_T/A	T	A	0.176756	0.05	330	0.127663	0.985791	1.57038
Pv2.1_02_2987296	Pv02	2987296	Pv2.1_02_2987296_C/T	C	T	0.176914	0.162121	330	0.127659	0.985791	0.966379
Pv2.1_04_2418542	Pv04	2418542	Pv2.1_04_2418542_C/T	C	T	0.176979	0.0454545	330	0.127658	0.985791	1.57119
Pv2.1_02_43593468	Pv02	43593468	Pv2.1_02_43593468_A/G	A	G	0.177112	0.209091	330	0.127655	0.985791	-1.26953
Pv2.1_02_1335868	Pv02	1335868	Pv2.1_02_1335868_C/T	C	T	0.177135	0.201515	330	0.127654	0.985791	0.914219
Pv2.1_09_36967251	Pv09	36967251	Pv2.1_09_36967251_G/T	G	T	0.177185	0.372727	330	0.127653	0.985791	0.678781
Pv2.1_02_42009915	Pv02	42009915	Pv2.1_02_42009915_A/C	A	C	0.177195	0.301515	330	0.127653	0.985791	-1.03693
Pv2.1_02_49506969	Pv02	49506969	Pv2.1_02_49506969_T/C	T	C	0.177365	0.498485	330	0.127649	0.985791	0.702522
Pv2.1_07_941928	Pv07	941928	Pv2.1_07_941928_T/G	T	G	0.177583	0.242424	330	0.127644	0.985791	-1.1444
Pv2.1_06_23551584	Pv06	23551584	Pv2.1_06_23551584_C/T	C	T	0.177652	0.0924242	330	0.127642	0.985791	1.1002
Pv2.1_11_2133612	Pv011	2133612	Pv2.1_11_2133612_G/A	G	A	0.177823	0.0969697	330	0.127638	0.985791	-1.19582
Pv2.1_08_62212556	Pv08	62212556	Pv2.1_08_62212556_C/T	C	T	0.178183	0.080303	330	0.12763	0.985791	1.32439
Pv2.1_07_184372	Pv07	184372	Pv2.1_07_184372_T/A	T	A	0.178281	0.240909	330	0.127628	0.985791	0.912752
Pv2.1_04_7272375	Pv04	7272375	Pv2.1_04_7272375_G/A	G	A	0.178286	0.178788	330	0.127628	0.985791	-1.02647
Pv2.1_03_41670406	Pv03	41670406	Pv2.1_03_41670406_A/G	A	G	0.178325	0.339394	330	0.127627	0.985791	-0.795156
Pv2.1_02_807252	Pv02	807252	Pv2.1_02_807252_C/G	C	G	0.178328	0.210606	330	0.127627	0.985791	-0.864434
Pv2.1_08_62327623	Pv08	62327623	Pv2.1_08_62327623_T/C	T	C	0.178345	0.343939	330	0.127627	0.985791	-0.786245
Pv2.1_05_36604341	Pv05	36604341	Pv2.1_05_36604341_T/C	T	C	0.178501	0.0833333	330	0.127623	0.985791	-1.18152
Pv2.1_05_5572047	Pv05	5572047	Pv2.1_05_5572047_C/T	C	T	0.178523	0.10303	330	0.127623	0.985791	-1.42028
Pv2.1_06_21738243	Pv06	21738243	Pv2.1_06_21738243_T/C	T	C	0.17856	0.069697	330	0.127622	0.985791	-1.4226
Pv2.1_01_50085251	Pv01	50085251	Pv2.1_01_50085251_T/C	T	C	0.178561	0.069697	330	0.127622	0.985791	-1.28097
Pv2.1_09_12097708	Pv09	12097708	Pv2.1_09_12097708_A/T	A	T	0.17899	0.0515152	330	0.127612	0.985791	1.47648
Pv2.1_09_29273869	Pv09	29273869	Pv2.1_09_29273869_C/A	C	A	0.179048	0.228788	330	0.127611	0.985791	-0.825619
Pv2.1_05_40640572	Pv05	40640572	Pv2.1_05_40640572_A/G	A	G	0.179062	0.0575758	330	0.12761	0.985791	-1.26862
Pv2.1_10_42544483	Pv010	42544483	Pv2.1_10_42544483_C/T	C	T	0.179264	0.0924242	330	0.127606	0.985791	-1.07041
Pv2.1_07_37462257	Pv07	37462257	Pv2.1_07_37462257_A/G	A	G	0.179319	0.215152	330	0.127605	0.985791	1.05422
Pv2.1_02_34792310	Pv02	34792310	Pv2.1_02_34792310_G/T	G	T	0.179338	0.172727	330	0.127604	0.985791	-0.994754
Pv2.1_05_4487165	Pv05	4487165	Pv2.1_05_4487165_G/A	G	A	0.179345	0.156061	330	0.127604	0.985791	-0.981294
Pv2.1_04_46176755	Pv04	46176755	Pv2.1_04_46176755_T/C	T	C	0.179442	0.19697	330	0.127602	0.985791	-0.837899
Pv2.1_10_41670338	Pv010	41670338	Pv2.1_10_41670338_C/T	C	T	0.179881	0.237879	330	0.127592	0.985791	0.986011
Pv2.1_07_37288523	Pv07	37288523	Pv2.1_07_37288523_C/T	C	T	0.179953	0.204545	330	0.12759	0.985791	1.10751
Pv2.1_04_506245	Pv04	506245	Pv2.1_04_506245_C/T	C	T	0.179985	0.192424	330	0.12759	0.985791	1.19865
Pv2.1_07_4550338	Pv07	4550338	Pv2.1_07_4550338_C/G	C	G	0.179989	0.112121	330	0.127589	0.985791	1.27919
Pv2.1_02_48705048	Pv02	48705048	Pv2.1_02_48705048_A/G	A	G	0.180044	0.490909	330	0.127588	0.985791	0.681483
Pv2.1_05_8547251	Pv05	8547251	Pv2.1_05_8547251_C/T	C	T	0.180093	0.0484848	330	0.127587	0.985791	-1.52672
Pv2.1_02_46600516	Pv02	46600516	Pv2.1_02_46600516_C/G	C	G	0.180137	0.339394	330	0.127586	0.985791	0.804904
Pv2.1_04_47087107	Pv04	47087107	Pv2.1_04_47087107_C/T	C	T	0.180195	0.198485	330	0.127585	0.985791	0.825218
Pv2.1_05_5744371	Pv05	5744371	Pv2.1_05_5744371_T/A	T	A	0.180253	0.069697	330	0.127584	0.985791	1.69419
Pv2.1_04_46887331	Pv04	46887331	Pv2.1_04_46887331_A/G	A	G	0.180518	0.165152	330	0.127578	0.985791	-1.06439
Pv2.1_02_43919018	Pv02	43919018	Pv2.1_02_43919018_C/G	C	G	0.180767	0.0969697	330	0.127572	0.985791	-1.1312
Pv2.1_10_42270358	Pv010	42270358	Pv2.1_10_42270358_A/G	A	G	0.18113	0.19697	330	0.127564	0.985791	1.00293
Pv2.1_02_1039961	Pv02	1039961	Pv2.1_02_1039961_C/G	C	G	0.181198	0.109091	330	0.127562	0.985791	1.16004
Pv2.1_09_11792573	Pv09	11792573	Pv2.1_09_11792573_G/T	G	T	0.181218	0.221212	330	0.127562	0.985791	-0.972836
Pv2.1_01_48107179	Pv01	48107179	Pv2.1_01_48107179_A/G	A	G	0.181436	0.0590909	330	0.127557	0.985791	-1.1426
Pv2.1_01_48981910	Pv01	48981910	Pv2.1_01_48981910_G/A	G	A	0.181506	0.0681818	330	0.127556	0.985791	-1.38788
Pv2.1_04_43712462	Pv04	43712462	Pv2.1_04_43712462_T/C	T	C	0.181518	0.0439394	330	0.127555	0.985791	1.28469
Pv2.1_04_43712442	Pv04	43712442	Pv2.1_04_43712442_A/T	A	T	0.181518	0.0439394	330	0.127555	0.985791	-1.28469
Pv2.1_11_1218435	Pv011	1218435	Pv2.1_11_1218435_A/C	A	C	0.181528	0.201515	330	0.127555	0.985791	0.929408
Pv2.1_08_60340343	Pv08	60340343	Pv2.1_08_60340343_G/T	G	T	0.182063	0.0833333	330	0.127543	0.985791	1.56325
Pv2.1_11_6490950	Pv011	6490950	Pv2.1_11_6490950_T/C	T	C	0.182116	0.0515152	330	0.127542	0.985791	1.21026
Pv2.1_02_44929444	Pv02	44929444	Pv2.1_02_44929444_C/T	C	T	0.182376	0.256061	330	0.127536	0.985791	-0.799036
Pv2.1_01_47261904	Pv01	47261904	Pv2.1_01_47261904_G/A	G	A	0.182477	0.157576	330	0.127534	0.985791	-1.12688
Pv2.1_04_46215617	Pv04	46215617	Pv2.1_04_46215617_T/A	T	A	0.182539	0.231818	330	0.127533	0.985791	-0.664157
Pv2.1_07_39289620	Pv07	39289620	Pv2.1_07_39289620_G/A	G	A	0.182638	0.242424	330	0.12753	0.985791	-0.728466
Pv2.1_02_22971307	Pv02	22971307	Pv2.1_02_22971307_A/G	A	G	0.182654	0.0969697	330	0.12753	0.985791	-1.25712
Pv2.1_07_36240789	Pv07	36240789	Pv2.1_07_36240789_T/A	T	A	0.182781	0.0954545	330	0.127527	0.985791	1.23143
Pv2.1_05_4487238	Pv05	4487238	Pv2.1_05_4487238_G/T	G	T	0.183233	0.139394	330	0.127517	0.985791	-0.864844
Pv2.1_03_922089	Pv03	922089	Pv2.1_03_922089_T/C	T	C	0.183235	0.0530303	330	0.127517	0.985791	1.2965
Pv2.1_03_42729360	Pv03	42729360	Pv2.1_03_42729360_A/G	A	G	0.183282	0.337879	330	0.127516	0.985791	0.81607
Pv2.1_03_45722483	Pv03	45722483	Pv2.1_03_45722483_T/G	T	G	0.183418	0.131818	330	0.127513	0.985791	1.07404
Pv2.1_02_39814232	Pv02	39814232	Pv2.1_02_39814232_C/T	C	T	0.183533	0.0878788	330	0.127511	0.985791	1.22314
Pv2.1_11_49889732	Pv011	49889732	Pv2.1_11_49889732_A/C	A	C	0.183645	0.224242	330	0.127508	0.985791	0.855939
Pv2.1_11_48890706	Pv011	48890706	Pv2.1_11_48890706_C/G	C	G	0.183741	0.0727273	330	0.127506	0.985791	1.25736
Pv2.1_08_62191464	Pv08	62191464	Pv2.1_08_62191464_T/C	T	C	0.183761	0.122727	330	0.127506	0.985791	-1.17831
Pv2.1_01_49992490	Pv01	49992490	Pv2.1_01_49992490_T/C	T	C	0.183886	0.0939394	330	0.127503	0.985791	-1.14407
Pv2.1_01_36016901	Pv01	36016901	Pv2.1_01_36016901_A/T	A	T	0.183892	0.1	330	0.127503	0.985791	-0.899721
Pv2.1_08_16674322	Pv08	16674322	Pv2.1_08_16674322_G/A	G	A	0.184179	0.157576	330	0.127497	0.985791	0.992377
Pv2.1_10_4755261	Pv010	4755261	Pv2.1_10_4755261_C/A	C	A	0.184289	0.175758	330	0.127494	0.985791	1.03758
Pv2.1_04_22568	Pv04	22568	Pv2.1_04_22568_G/T	G	T	0.184405	0.395455	330	0.127492	0.985791	0.69712
Pv2.1_10_7557510	Pv010	7557510	Pv2.1_10_7557510_T/A	T	A	0.184531	0.0454545	330	0.127489	0.985791	1.39537
Pv2.1_03_2587753	Pv03	2587753	Pv2.1_03_2587753_C/T	C	T	0.184682	0.10303	330	0.127486	0.985791	1.14575
Pv2.1_11_50116398	Pv011	50116398	Pv2.1_11_50116398_T/C	T	C	0.184877	0.181818	330	0.127481	0.985791	-0.996584
Pv2.1_01_44449495	Pv01	44449495	Pv2.1_01_44449495_G/A	G	A	0.184889	0.157576	330	0.127481	0.985791	-0.893978
[truncated: 7,685 more rows]

## Sheet: MIP
Marker	Chromosome	Position	Marker ID	Reference allele	Alternative allele	p value	MAF	n	R2	FDR Adjusted p values	Effect
[truncated: 26,500 more rows]
